# Supplementary material for: Genomic and immunological profiles of small-cell lung cancer between East Asians and Caucasian
Source: Springer Nature journal article supplement (doi:10.1186/s12935-022-02588-w), 2022-04-29

### East Asian

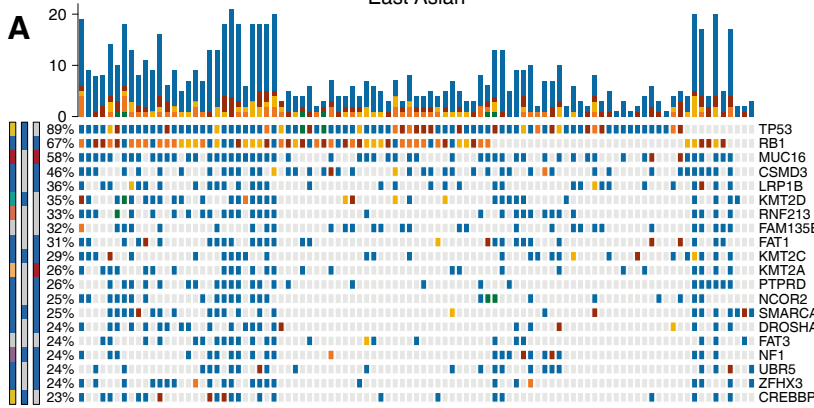

**CGC annotation**

- fusion
- oncogene
- oncogene, fusion
- oncogene, TSG
- oncogene, TSG, fusion
- TSG
- TSG, fusion
- Unknown

**Vogelstein annotation**

- oncogene
- TSG
- Unknown

**NCG6 annotation**

- oncogene
- TSG
- Unknown

**Alterations**

- Splice Site
- Missense
- Frameshift
- Inframe ins/del
- Nonsense

### Caucasian

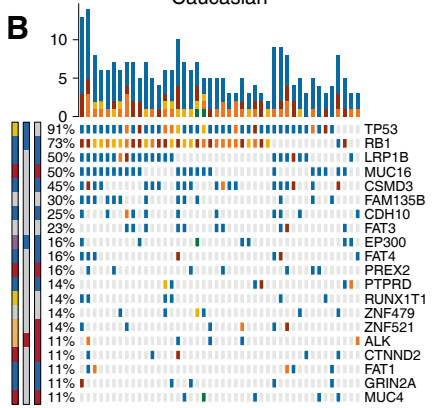

**TP53 Status**

- TP53-MT
- TP53-WT

**RB1 Status**

- RB1-MT
- RB1-WT

### C

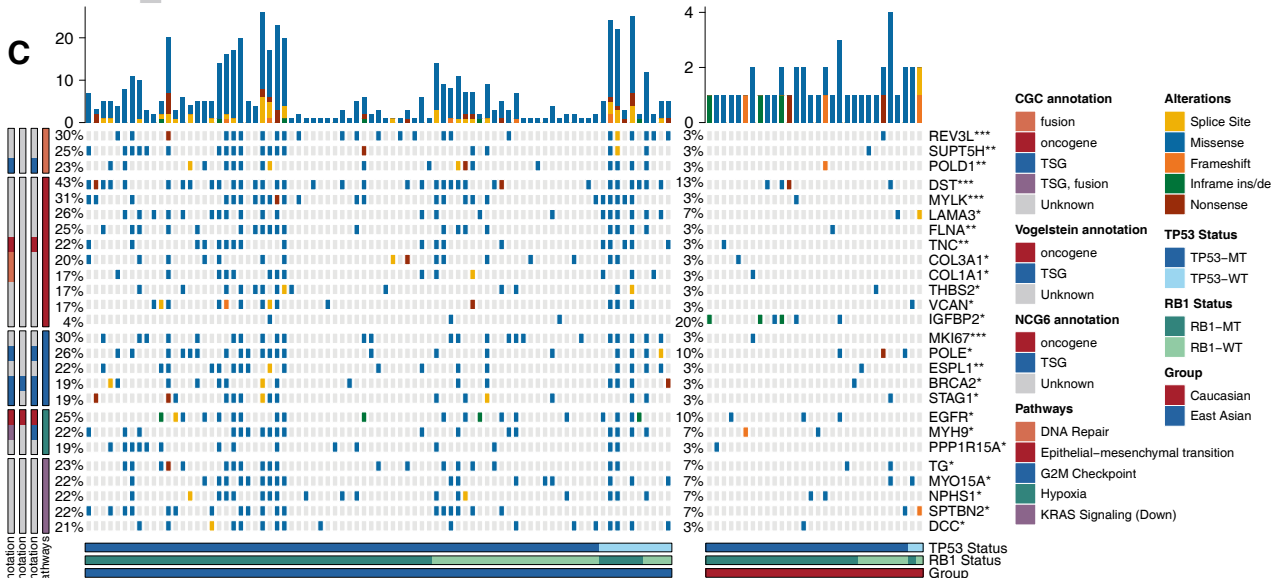

### East Asian

### Caucasian

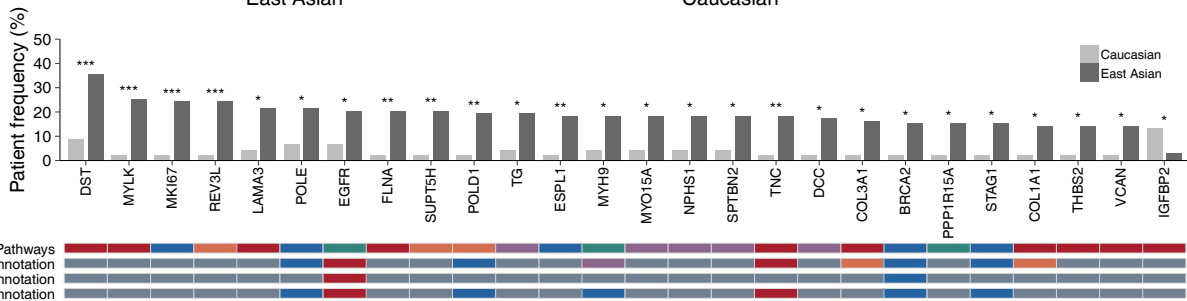

Supplement: MOESM4 [file 20359852]
