# Supplementary material for: Genomic and immunological profiles of small-cell lung cancer between East Asians and Caucasian
Source: Springer Nature journal article supplement (doi:10.1186/s12935-022-02588-w), 2022-04-29

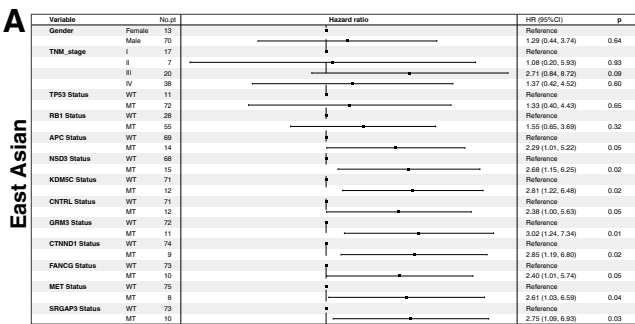

East Asian

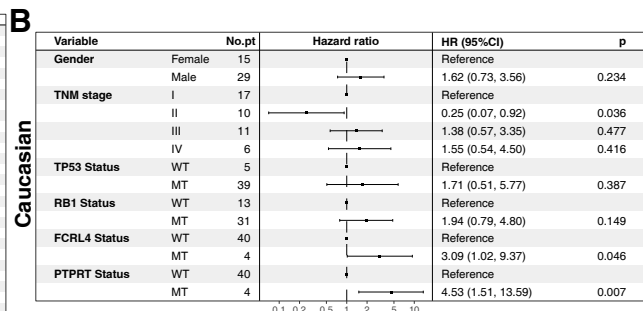

Caucasian

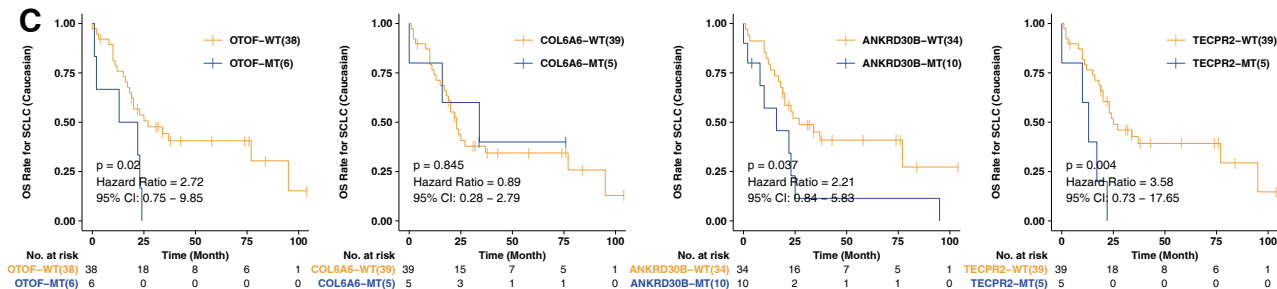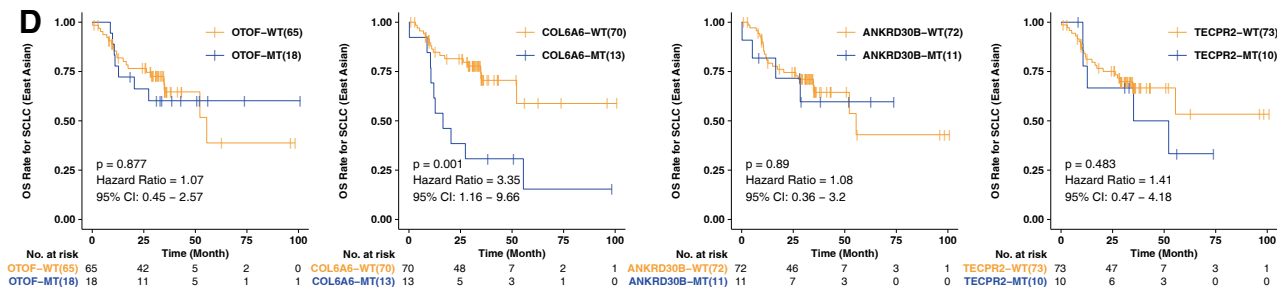

Supplement: MOESM5 [file 20359852]
