# Supplementary material for: Genomic and immunological profiles of small-cell lung cancer between East Asians and Caucasian
Source: Springer Nature journal article supplement (doi:10.1186/s12935-022-02588-w), 2022-04-29
Supplement: MOESM6 [file 20359852]

**A**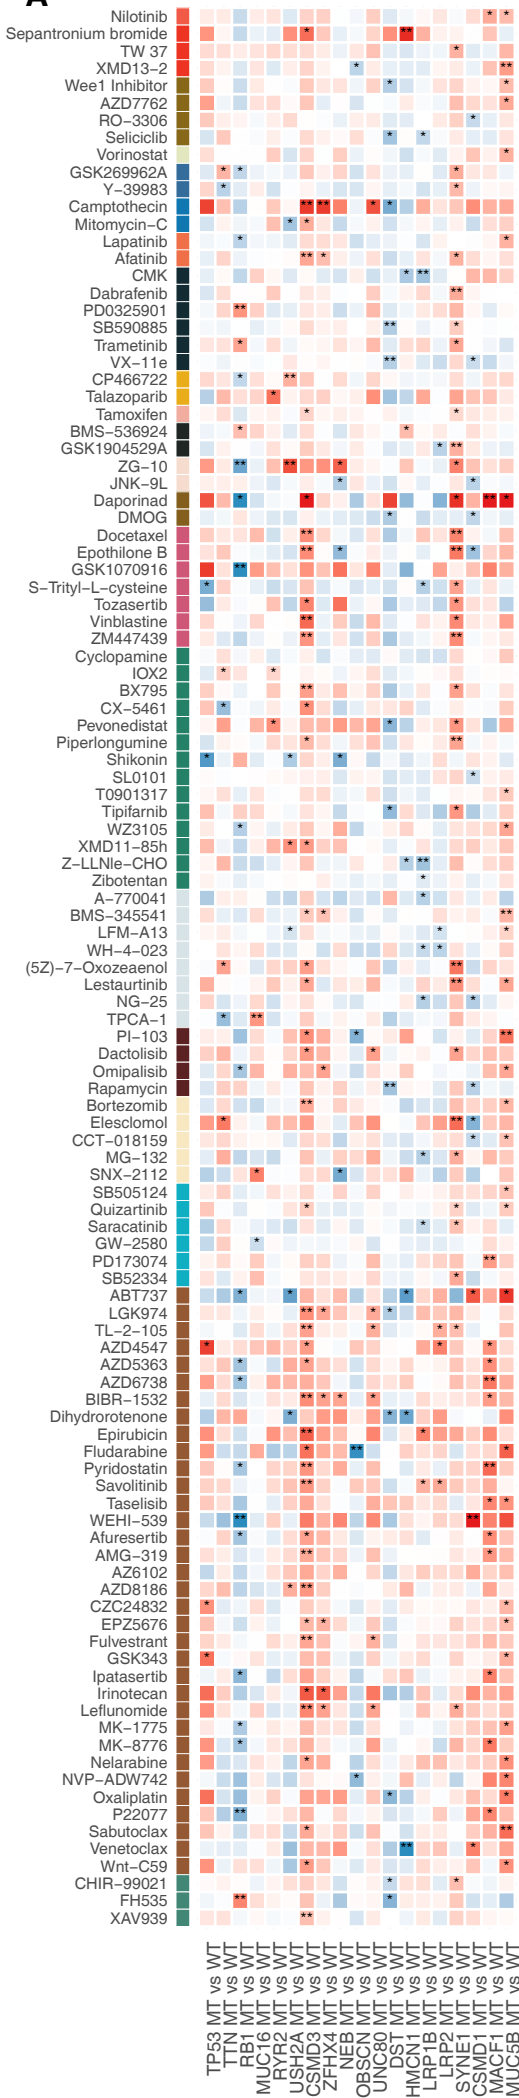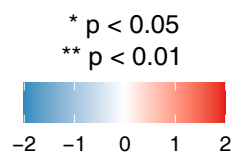

- ABL signaling
- Apoptosis regulation
- Cell cycle
- Chromatin histone acetylation
- Cytoskeleton
- DNA replication
- EGFR signaling
- ERK MAPK signaling
- Genome integrity
- Hormone-related
- IGF1R signaling
- JNK and p38 signaling
- Metabolism
- Mitosis
- Other
- Other, kinases
- PI3K/MTOR signaling
- Protein stability and degradation
- RTK signaling
- Unclassified
- WNT signaling

**B**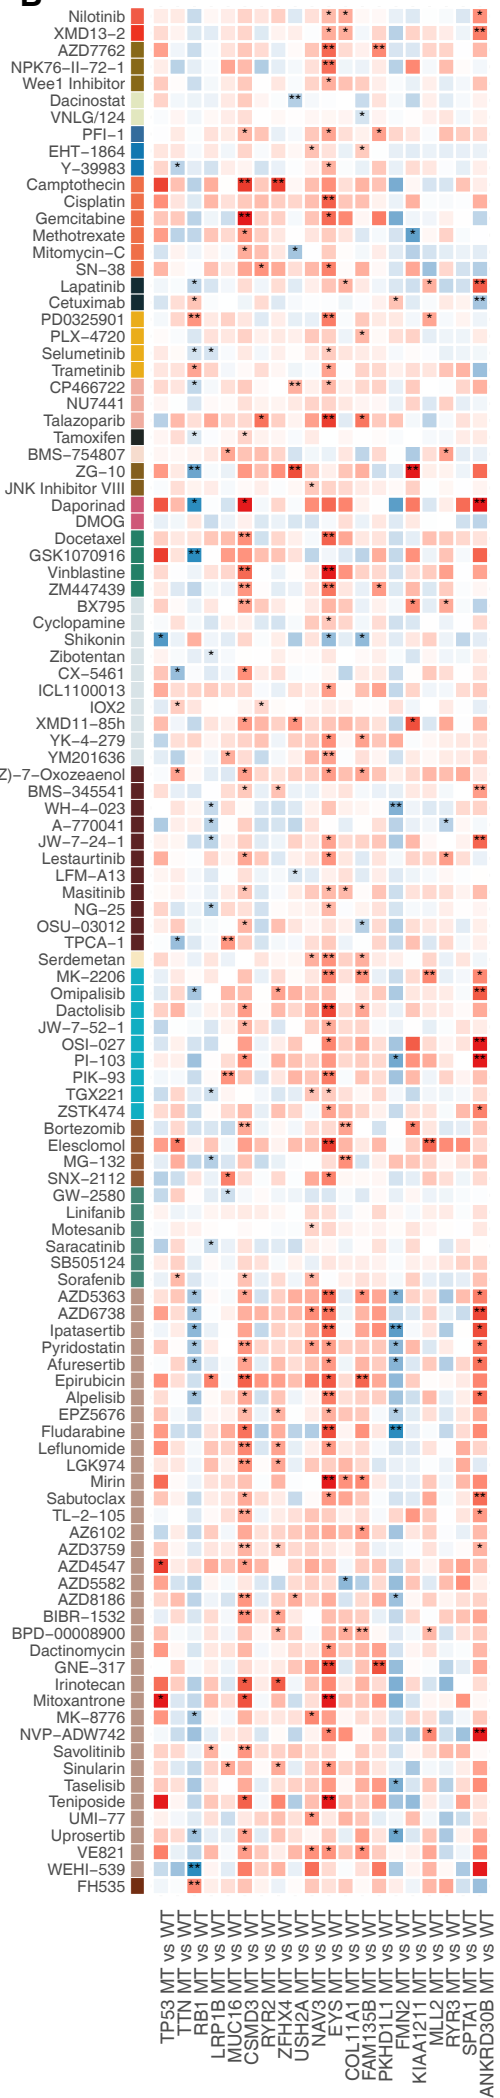

- ABL signaling
- Apoptosis regulation
- Cell cycle
- Chromatin histone acetylation
- Chromatin other
- Cytoskeleton
- DNA replication
- EGFR signaling
- ERK MAPK signaling
- Genome integrity
- Hormone-related
- IGF1R signaling
- JNK and p38 signaling
- Metabolism
- Mitosis
- Other
- Other, kinases
- p53 pathway
- PI3K/MTOR signaling
- Protein stability and degradation
- RTK signaling
- Unclassified
- WNT signaling

TP53 MT vs WT  
 TTN MT vs WT  
 RB1 MT vs WT  
 RYR2 MT vs WT  
 MUC16 MT vs WT  
 U5MD3 MT vs WT  
 ZFH4 MT vs WT  
 NEB MT vs WT  
 UNCG MT vs WT  
 DST MT vs WT  
 HMCN1 MT vs WT  
 LRP2 MT vs WT  
 SYNE1 MT vs WT  
 CSMD1 MT vs WT  
 MACH1 MT vs WT  
 MUC5B MT vs WT

TP53 MT vs WT  
 TTN MT vs WT  
 RB1 MT vs WT  
 LRP1B MT vs WT  
 MUC16 MT vs WT  
 C5MB3 MT vs WT  
 RYR2 MT vs WT  
 ZFH4 MT vs WT  
 U5MD3 MT vs WT  
 NAV3 MT vs WT  
 EYS MT vs WT  
 COL11A1 MT vs WT  
 FAM135B MT vs WT  
 PKHD1L1 MT vs WT  
 FNM2 MT vs WT  
 KIAA1211 MT vs WT  
 MLL2 MT vs WT  
 RYR3 MT vs WT  
 SPTA1 MT vs WT  
 ANKRD30B MT vs WT
