# Supplementary material for: Genomic and immunological profiles of small-cell lung cancer between East Asians and Caucasian
Source: Springer Nature journal article supplement (doi:10.1186/s12935-022-02588-w), 2022-04-29
Supplement: MOESM10 [file 20359852]

Supplementary Table.1 Related to Supplementary Fig. 1a The results of co-occurrence/mutual exclusivity of oncogenes/TSGs in the EA cohort (Top20 mutated genes).

| gene1 | gene2 | pValue      | oddsRatio   | 00 | 11 | 01 | 10 | Event        | pair         | event_ratio |
|-------|-------|-------------|-------------|----|----|----|----|--------------|--------------|-------------|
| KMT2D | OBSCN | 8.49876E-07 | 9.824415208 | 51 | 25 | 14 | 9  | Co Occurence | KMT2D, OBSCN | 25/23       |
| CSMD1 | MACF1 | 3.40775E-06 | 8.749043912 | 54 | 22 | 11 | 12 | Co Occurence | CSMD1, MACF1 | 22/23       |
| OBSCN | MACF1 | 2.24193E-05 | 7.019181728 | 50 | 23 | 10 | 16 | Co Occurence | MACF1, OBSCN | 23/26       |
| NEB   | MUC16 | 2.59751E-05 | 7.218846114 | 36 | 33 | 23 | 7  | Co Occurence | MUC16, NEB   | 33/30       |
| KMT2D | DST   | 4.92594E-05 | 6.526540499 | 51 | 22 | 14 | 12 | Co Occurence | DST, KMT2D   | 22/26       |
| MACF1 | SYNE1 | 5.05413E-05 | 6.353913251 | 52 | 21 | 14 | 12 | Co Occurence | MACF1, SYNE1 | 21/26       |
| MACF1 | NEB   | 6.3288E-05  | 6.482421706 | 49 | 23 | 17 | 10 | Co Occurence | MACF1, NEB   | 23/27       |
| MUC5B | MACF1 | 8.77076E-05 | 6.133634101 | 53 | 20 | 13 | 13 | Co Occurence | MACF1, MUC5B | 20/26       |
| SYNE1 | OBSCN | 0.000102677 | 5.633472909 | 48 | 23 | 16 | 12 | Co Occurence | OBSCN, SYNE1 | 23/28       |
| MUC16 | SYNE1 | 0.000108784 | 6.494174412 | 37 | 29 | 6  | 27 | Co Occurence | MUC16, SYNE1 | 29/33       |
| USH2A | OBSCN | 0.000179285 | 5.152420636 | 42 | 27 | 12 | 18 | Co Occurence | OBSCN, USH2A | 27/30       |
| KMT2D | MACF1 | 0.000238958 | 5.59645448  | 52 | 20 | 13 | 14 | Co Occurence | KMT2D, MACF1 | 20/27       |
| ZFHX4 | CSMD1 | 0.000243138 | 5.298160256 | 45 | 24 | 10 | 20 | Co Occurence | CSMD1, ZFHX4 | 24/30       |
| ZFHX4 | KMT2D | 0.000243138 | 5.298160256 | 45 | 24 | 10 | 20 | Co Occurence | KMT2D, ZFHX4 | 24/30       |
| DST   | OBSCN | 0.000245895 | 5.099216017 | 47 | 23 | 16 | 13 | Co Occurence | DST, OBSCN   | 23/29       |
| HMCN1 | OBSCN | 0.000245895 | 5.099216017 | 47 | 23 | 16 | 13 | Co Occurence | HMCN1, OBSCN | 23/29       |
| KMT2D | CSMD1 | 0.000326424 | 5.104098851 | 51 | 20 | 14 | 14 | Co Occurence | CSMD1, KMT2D | 20/28       |
| HMCN1 | KMT2D | 0.000333629 | 5.27919529  | 50 | 21 | 13 | 15 | Co Occurence | HMCN1, KMT2D | 21/28       |
| OBSCN | MUC16 | 0.000352812 | 5.328042497 | 35 | 31 | 25 | 8  | Co Occurence | MUC16, OBSCN | 31/33       |
| HMCN1 | LRP2  | 0.000443974 | 4.810713579 | 49 | 21 | 14 | 15 | Co Occurence | HMCN1, LRP2  | 21/29       |
| UNC80 | HMCN1 | 0.000448758 | 4.935572407 | 48 | 22 | 14 | 15 | Co Occurence | HMCN1, UNC80 | 22/29       |
| MUC16 | RYR2  | 0.00050561  | 4.572447289 | 31 | 36 | 12 | 20 | Co Occurence | MUC16, RYR2  | 36/32       |
| KMT2D | NEB   | 0.000524876 | 4.702527013 | 47 | 22 | 18 | 12 | Co Occurence | KMT2D, NEB   | 22/30       |
| MACF1 | ZFHX4 | 0.000525139 | 4.842280411 | 45 | 23 | 21 | 10 | Co Occurence | MACF1, ZFHX4 | 23/31       |
| NEB   | DST   | 0.000561546 | 4.702806222 | 46 | 23 | 13 | 17 | Co Occurence | DST, NEB     | 23/30       |
| LRP1B | OBSCN | 0.000568698 | 4.597234625 | 47 | 22 | 17 | 13 | Co Occurence | LRP1B, OBSCN | 22/30       |
| LRP2  | OBSCN | 0.000568698 | 4.597234625 | 47 | 22 | 17 | 13 | Co Occurence | LRP2, OBSCN  | 22/30       |
| MACF1 | HMCN1 | 0.000737023 | 4.721057333 | 50 | 20 | 16 | 13 | Co Occurence | HMCN1, MACF1 | 20/29       |
| KMT2D | SYNE1 | 0.000754216 | 4.676580227 | 50 | 20 | 15 | 14 | Co Occurence | KMT2D, SYNE1 | 20/29       |
| OBSCN | NEB   | 0.000768944 | 4.327409029 | 44 | 24 | 16 | 15 | Co Occurence | NEB, OBSCN   | 24/31       |
| NEB   | ZFHX4 | 0.000951    | 4.163172368 | 41 | 26 | 18 | 14 | Co Occurence | NEB, ZFHX4   | 26/32       |
| HMCN1 | DST   | 0.000992524 | 4.403991927 | 48 | 21 | 15 | 15 | Co Occurence | DST, HMCN1   | 21/30       |
| UNC80 | MACF1 | 0.000994495 | 4.359635512 | 49 | 20 | 13 | 17 | Co Occurence | MACF1, UNC80 | 20/30       |
| TTN   | MUC16 | 0.000994624 | 5.928778372 | 16 | 51 | 5  | 27 | Co Occurence | MUC16, TTN   | 51/32       |
| SYNE1 | LRP1B | 0.001064586 | 4.282955851 | 49 | 20 | 15 | 15 | Co Occurence | LRP1B, SYNE1 | 20/30       |
| NEB   | LRP1B | 0.001194325 | 4.254206697 | 46 | 22 | 13 | 18 | Co Occurence | LRP1B, NEB   | 22/31       |

|       |       |             |             |    |    |    |    |              |              |       |
|-------|-------|-------------|-------------|----|----|----|----|--------------|--------------|-------|
| TTN   | CSMD3 | 0.001219582 | 6.875534159 | 18 | 42 | 3  | 36 | Co Occurence | CSMD3, TTN   | 42/39 |
| MACF1 | TTN   | 0.001347827 | 13.65701646 | 20 | 32 | 46 | 1  | Co Occurence | MACF1, TTN   | 32/47 |
| ZFHX4 | DST   | 0.001434495 | 4.231728445 | 43 | 24 | 12 | 20 | Co Occurence | DST, ZFHX4   | 24/32 |
| USH2A | KMT2D | 0.001591614 | 4.02431747  | 43 | 23 | 11 | 22 | Co Occurence | KMT2D, USH2A | 23/33 |
| MACF1 | LRP1B | 0.001672682 | 4.171584839 | 50 | 19 | 16 | 14 | Co Occurence | LRP1B, MACF1 | 19/30 |
| MUC5B | SYNE1 | 0.001672682 | 4.171584839 | 50 | 19 | 16 | 14 | Co Occurence | MUC5B, SYNE1 | 19/30 |
| OBSCN | TTN   | 0.001970431 | 8.421811731 | 19 | 37 | 41 | 2  | Co Occurence | OBSCN, TTN   | 37/43 |
| UNC80 | TTN   | 0.002405048 | 7.604334084 | 19 | 35 | 43 | 2  | Co Occurence | TTN, UNC80   | 35/45 |
| ZFHX4 | RYR2  | 0.002450695 | 3.611835418 | 36 | 29 | 19 | 15 | Co Occurence | RYR2, ZFHX4  | 29/34 |
| NEB   | HMCN1 | 0.002624296 | 3.869505595 | 45 | 22 | 14 | 18 | Co Occurence | HMCN1, NEB   | 22/32 |
| MUC5B | DST   | 0.003566591 | 3.852033413 | 49 | 19 | 17 | 14 | Co Occurence | DST, MUC5B   | 19/31 |
| TTN   | HMCN1 | 0.004284665 | 7.222939503 | 19 | 34 | 2  | 44 | Co Occurence | HMCN1, TTN   | 34/46 |
| UNC80 | LRP1B | 0.004399389 | 3.633250797 | 47 | 20 | 15 | 17 | Co Occurence | LRP1B, UNC80 | 20/32 |
| ZFHX4 | MUC16 | 0.004478273 | 3.399721954 | 31 | 32 | 24 | 12 | Co Occurence | MUC16, ZFHX4 | 32/36 |
| CSMD1 | DST   | 0.004533183 | 3.526276965 | 48 | 19 | 17 | 15 | Co Occurence | CSMD1, DST   | 19/32 |
| SYNE1 | LRP2  | 0.00459002  | 3.512413674 | 48 | 19 | 16 | 16 | Co Occurence | LRP2, SYNE1  | 19/32 |
| CSMD1 | OBSCN | 0.005268683 | 3.411620818 | 46 | 20 | 19 | 14 | Co Occurence | CSMD1, OBSCN | 20/33 |
| ZFHX4 | HMCN1 | 0.005885121 | 3.490266363 | 42 | 23 | 13 | 21 | Co Occurence | HMCN1, ZFHX4 | 23/34 |
| MUC16 | HMCN1 | 0.006265379 | 3.472087846 | 34 | 27 | 9  | 29 | Co Occurence | HMCN1, MUC16 | 27/38 |
| MACF1 | LRP2  | 0.007178128 | 3.411612461 | 49 | 18 | 17 | 15 | Co Occurence | LRP2, MACF1  | 18/32 |
| NEB   | USH2A | 0.007324993 | 3.209093481 | 39 | 25 | 20 | 15 | Co Occurence | NEB, USH2A   | 25/35 |
| OBSCN | ZFHX4 | 0.007363283 | 3.160228276 | 40 | 24 | 20 | 15 | Co Occurence | OBSCN, ZFHX4 | 24/35 |
| MACF1 | MUC16 | 0.009426667 | 3.483114653 | 35 | 25 | 31 | 8  | Co Occurence | MACF1, MUC16 | 25/39 |
| CSMD1 | NEB   | 0.009602547 | 3.173679581 | 45 | 20 | 20 | 14 | Co Occurence | CSMD1, NEB   | 20/34 |
| MUC5B | ZFHX4 | 0.0097334   | 3.230369769 | 43 | 21 | 23 | 12 | Co Occurence | MUC5B, ZFHX4 | 21/35 |
| UNC80 | OBSCN | 0.010281703 | 3.167811425 | 44 | 21 | 18 | 16 | Co Occurence | OBSCN, UNC80 | 21/34 |
| ZFHX4 | LRP1B | 0.010639653 | 3.190321628 | 42 | 22 | 13 | 22 | Co Occurence | LRP1B, ZFHX4 | 22/35 |
| ZFHX4 | SYNE1 | 0.010639653 | 3.190321628 | 42 | 22 | 13 | 22 | Co Occurence | SYNE1, ZFHX4 | 22/35 |
| LRP2  | MUC16 | 0.010939547 | 3.234676116 | 34 | 26 | 30 | 9  | Co Occurence | LRP2, MUC16  | 26/39 |
| MUC16 | UNC80 | 0.012669574 | 3.037229926 | 33 | 27 | 10 | 29 | Co Occurence | MUC16, UNC80 | 27/39 |
| RYR2  | TTN   | 0.013778491 | 3.878588548 | 16 | 43 | 35 | 5  | Co Occurence | RYR2, TTN    | 43/40 |
| MACF1 | DST   | 0.014008706 | 3.159147565 | 48 | 18 | 18 | 15 | Co Occurence | DST, MACF1   | 18/33 |
| CSMD1 | LRP1B | 0.014141934 | 3.136126457 | 48 | 18 | 17 | 16 | Co Occurence | CSMD1, LRP1B | 18/33 |
| CSMD1 | SYNE1 | 0.014141934 | 3.136126457 | 48 | 18 | 17 | 16 | Co Occurence | CSMD1, SYNE1 | 18/33 |
| MUC5B | OBSCN | 0.015660141 | 3.082954867 | 46 | 19 | 20 | 14 | Co Occurence | MUC5B, OBSCN | 19/34 |
| USH2A | RYR2  | 0.015808869 | 2.769673541 | 34 | 28 | 20 | 17 | Co Occurence | RYR2, USH2A  | 28/37 |
| UNC80 | LRP2  | 0.016242905 | 2.998193519 | 46 | 19 | 16 | 18 | Co Occurence | LRP2, UNC80  | 19/34 |
| UNC80 | SYNE1 | 0.016242905 | 2.998193519 | 46 | 19 | 16 | 18 | Co Occurence | SYNE1, UNC80 | 19/34 |
| MUC5B | NEB   | 0.017501109 | 2.874743603 | 45 | 19 | 21 | 14 | Co Occurence | MUC5B, NEB   | 19/35 |

|       |       |             |             |    |    |    |    |              |              |       |
|-------|-------|-------------|-------------|----|----|----|----|--------------|--------------|-------|
| USH2A | MACF1 | 0.01782905  | 3.026248188 | 42 | 21 | 12 | 24 | Co Occurence | MACF1, USH2A | 21/36 |
| LRP2  | NEB   | 0.018051779 | 2.899529707 | 44 | 20 | 20 | 15 | Co Occurence | LRP2, NEB    | 20/35 |
| SYNE1 | NEB   | 0.018051779 | 2.899529707 | 44 | 20 | 20 | 15 | Co Occurence | NEB, SYNE1   | 20/35 |
| MUC16 | CSMD1 | 0.018661561 | 3.012341933 | 34 | 25 | 9  | 31 | Co Occurence | CSMD1, MUC16 | 25/40 |
| RB1   | USH2A | 0.019640525 | 2.983198094 | 25 | 35 | 10 | 29 | Co Occurence | RB1, USH2A   | 35/39 |
| CSMD3 | CSMD1 | 0.021134316 | 2.730186607 | 41 | 21 | 13 | 24 | Co Occurence | CSMD1, CSMD3 | 21/37 |
| MUC16 | DST   | 0.021161988 | 2.829504318 | 33 | 26 | 10 | 30 | Co Occurence | DST, MUC16   | 26/40 |
| TTN   | DST   | 0.021291442 | 4.344005861 | 18 | 33 | 3  | 45 | Co Occurence | DST, TTN     | 33/48 |
| RZR2  | KMT2D | 0.021862379 | 2.721081613 | 39 | 22 | 12 | 26 | Co Occurence | KMT2D, RZR2  | 22/38 |
| RB1   | TTN   | 0.023031256 | 3.147473143 | 12 | 55 | 23 | 9  | Co Occurence | RB1, TTN     | 55/32 |
| DST   | RZR2  | 0.023284566 | 2.661542057 | 38 | 23 | 25 | 13 | Co Occurence | DST, RZR2    | 23/38 |
| MUC5B | LRP1B | 0.025365324 | 2.801307355 | 48 | 17 | 18 | 16 | Co Occurence | LRP1B, MUC5B | 17/34 |
| MUC5B | LRP2  | 0.025365324 | 2.801307355 | 48 | 17 | 18 | 16 | Co Occurence | LRP2, MUC5B  | 17/34 |
| NEB   | RZR2  | 0.025520724 | 2.582621173 | 36 | 25 | 23 | 15 | Co Occurence | NEB, RZR2    | 25/38 |
| USH2A | MUC16 | 0.027049454 | 2.543545068 | 29 | 31 | 25 | 14 | Co Occurence | MUC16, USH2A | 31/39 |
| USH2A | CSMD3 | 0.02782803  | 2.496443057 | 35 | 26 | 19 | 19 | Co Occurence | CSMD3, USH2A | 26/38 |
| USH2A | TTN   | 0.028342306 | 3.329002376 | 16 | 40 | 38 | 5  | Co Occurence | TTN, USH2A   | 40/43 |
| UNC80 | CSMD1 | 0.028630055 | 2.694331402 | 46 | 18 | 16 | 19 | Co Occurence | CSMD1, UNC80 | 18/35 |
| UNC80 | KMT2D | 0.028630055 | 2.694331402 | 46 | 18 | 16 | 19 | Co Occurence | KMT2D, UNC80 | 18/35 |
| HMCN1 | LRP1B | 0.028953118 | 2.676816383 | 46 | 18 | 17 | 18 | Co Occurence | HMCN1, LRP1B | 18/35 |
| DST   | SYNE1 | 0.028953118 | 2.676816383 | 46 | 18 | 17 | 18 | Co Occurence | DST, SYNE1   | 18/35 |
| HMCN1 | SYNE1 | 0.028953118 | 2.676816383 | 46 | 18 | 17 | 18 | Co Occurence | HMCN1, SYNE1 | 18/35 |
| MUC5B | MUC16 | 0.031059573 | 2.803688497 | 34 | 24 | 32 | 9  | Co Occurence | MUC16, MUC5B | 24/41 |
| LRP1B | MUC16 | 0.034534776 | 2.634982416 | 33 | 25 | 31 | 10 | Co Occurence | LRP1B, MUC16 | 25/41 |
| LRP2  | CSMD3 | 0.036846242 | 2.476079148 | 40 | 21 | 24 | 14 | Co Occurence | CSMD3, LRP2  | 21/38 |
| SYNE1 | USH2A | 0.036846242 | 2.476079148 | 40 | 21 | 24 | 14 | Co Occurence | SYNE1, USH2A | 21/38 |
| SYNE1 | TTN   | 0.037645176 | 4.122861496 | 18 | 32 | 46 | 3  | Co Occurence | SYNE1, TTN   | 32/49 |
| CSMD1 | TTN   | 0.037877562 | 3.910035155 | 18 | 31 | 47 | 3  | Co Occurence | CSMD1, TTN   | 31/50 |
| KMT2D | TTN   | 0.037877562 | 3.910035155 | 18 | 31 | 47 | 3  | Co Occurence | KMT2D, TTN   | 31/50 |
| OBSCN | CSMD3 | 0.039126914 | 2.459366077 | 38 | 23 | 22 | 16 | Co Occurence | CSMD3, OBSCN | 23/38 |
| KMT2D | MUC5B | 0.044860055 | 2.485034574 | 48 | 16 | 17 | 18 | Co Occurence | KMT2D, MUC5B | 16/35 |
| LRP2  | KMT2D | 0.045326487 | 2.584172642 | 47 | 17 | 17 | 18 | Co Occurence | KMT2D, LRP2  | 17/35 |
| MACF1 | RB1   | 0.045853104 | 2.710176001 | 28 | 26 | 38 | 7  | Co Occurence | MACF1, RB1   | 26/45 |
| ZFHx4 | TTN   | 0.046790166 | 3.164308025 | 16 | 39 | 39 | 5  | Co Occurence | TTN, ZFHx4   | 39/44 |
| LRP2  | LRP1B | 0.050079833 | 2.390921076 | 46 | 17 | 18 | 18 | Co Occurence | LRP1B, LRP2  | 17/36 |
| RB1   | OBSCN | 0.052904822 | 2.525310421 | 26 | 30 | 9  | 34 | Co Occurence | OBSCN, RB1   | 30/43 |
| MACF1 | RZR2  | 0.054078949 | 2.50354998  | 39 | 21 | 27 | 12 | Co Occurence | MACF1, RZR2  | 21/39 |
| MUC16 | KMT2D | 0.054995633 | 2.452439472 | 33 | 24 | 10 | 32 | Co Occurence | KMT2D, MUC16 | 24/42 |
| MUC16 | RB1   | 0.056468568 | 2.355285632 | 20 | 41 | 23 | 15 | Co Occurence | MUC16, RB1   | 41/38 |

|       |       |             |             |    |    |    |    |              |              |       |
|-------|-------|-------------|-------------|----|----|----|----|--------------|--------------|-------|
| CSMD3 | RB1   | 0.056848992 | 2.449997645 | 24 | 34 | 30 | 11 | Co Occurence | CSMD3, RB1   | 34/41 |
| CSMD3 | KMT2D | 0.059650309 | 2.2661015   | 40 | 20 | 14 | 25 | Co Occurence | CSMD3, KMT2D | 20/39 |
| DST   | USH2A | 0.061277533 | 2.255585724 | 39 | 21 | 24 | 15 | Co Occurence | DST, USH2A   | 21/39 |
| ZFHX4 | UNC80 | 0.063710022 | 2.207046148 | 39 | 21 | 16 | 23 | Co Occurence | UNC80, ZFHX4 | 21/39 |
| USH2A | ZFHX4 | 0.066988631 | 2.282696504 | 35 | 25 | 19 | 20 | Co Occurence | USH2A, ZFHX4 | 25/39 |
| CSMD3 | MUC16 | 0.070991345 | 2.136938879 | 28 | 30 | 26 | 15 | Co Occurence | CSMD3, MUC16 | 30/41 |
| RB1   | TP53  | 0.077534762 | 2.831135377 | 8  | 58 | 27 | 6  | Co Occurence | RB1, TP53    | 58/33 |
| RB1   | SYNE1 | 0.078074316 | 2.44110263  | 27 | 27 | 8  | 37 | Co Occurence | RB1, SYNE1   | 27/45 |
| LRP2  | DST   | 0.081029651 | 2.217811608 | 45 | 17 | 19 | 18 | Co Occurence | DST, LRP2    | 17/37 |
| MACF1 | CSMD3 | 0.093245346 | 2.072050405 | 40 | 19 | 26 | 14 | Co Occurence | CSMD3, MACF1 | 19/40 |
| MUC5B | USH2A | 0.093245346 | 2.072050405 | 40 | 19 | 26 | 14 | Co Occurence | MUC5B, USH2A | 19/40 |
| LRP1B | CSMD3 | 0.095389798 | 2.064276867 | 39 | 20 | 25 | 15 | Co Occurence | CSMD3, LRP1B | 20/40 |
| SYNE1 | CSMD3 | 0.095389798 | 2.064276867 | 39 | 20 | 25 | 15 | Co Occurence | CSMD3, SYNE1 | 20/40 |
| LRP1B | USH2A | 0.095389798 | 2.064276867 | 39 | 20 | 25 | 15 | Co Occurence | LRP1B, USH2A | 20/40 |
| LRP2  | USH2A | 0.095389798 | 2.064276867 | 39 | 20 | 25 | 15 | Co Occurence | LRP2, USH2A  | 20/40 |
| NEB   | UNC80 | 0.095482424 | 2.04534027  | 41 | 19 | 18 | 21 | Co Occurence | NEB, UNC80   | 19/39 |
| UNC80 | CSMD3 | 0.097427659 | 2.062433349 | 38 | 21 | 24 | 16 | Co Occurence | CSMD3, UNC80 | 21/40 |
| UNC80 | USH2A | 0.097427659 | 2.062433349 | 38 | 21 | 24 | 16 | Co Occurence | UNC80, USH2A | 21/40 |
| SYNE1 | RYR2  | 0.098164788 | 2.040379913 | 37 | 21 | 27 | 14 | Co Occurence | RYR2, SYNE1  | 21/41 |
| CSMD3 | RYR2  | 0.108625304 | 1.976373365 | 32 | 26 | 22 | 19 | Co Occurence | CSMD3, RYR2  | 26/41 |
| MUC5B | CSMD1 | 0.118998914 | 2.045647294 | 47 | 15 | 19 | 18 | Co Occurence | CSMD1, MUC5B | 15/37 |
| KMT2D | LRP1B | 0.120418445 | 2.134614194 | 46 | 16 | 19 | 18 | Co Occurence | KMT2D, LRP1B | 16/37 |
| LRP1B | TTN   | 0.121599161 | 2.776674084 | 17 | 31 | 47 | 4  | Co Occurence | LRP1B, TTN   | 31/51 |
| RB1   | MUC5B | 0.122021142 | 2.147168552 | 27 | 25 | 8  | 39 | Co Occurence | MUC5B, RB1   | 25/47 |
| RYR2  | RB1   | 0.14046878  | 2.027603381 | 22 | 35 | 29 | 13 | Co Occurence | RB1, RYR2    | 35/42 |
| USH2A | CSMD1 | 0.143468317 | 1.887485127 | 39 | 19 | 15 | 26 | Co Occurence | CSMD1, USH2A | 19/41 |
| ZFHX4 | RB1   | 0.145264386 | 1.904124084 | 23 | 32 | 32 | 12 | Co Occurence | RB1, ZFHX4   | 32/44 |
| HMCN1 | USH2A | 0.145999974 | 1.887483511 | 38 | 20 | 25 | 16 | Co Occurence | HMCN1, USH2A | 20/41 |
| HMCN1 | RYR2  | 0.150134067 | 1.854784252 | 36 | 21 | 27 | 15 | Co Occurence | HMCN1, RYR2  | 21/42 |
| MUC5B | TTN   | 0.19113188  | 2.494077153 | 17 | 29 | 49 | 4  | Co Occurence | MUC5B, TTN   | 29/53 |
| MUC5B | HMCN1 | 0.193012292 | 1.774959967 | 45 | 15 | 21 | 18 | Co Occurence | HMCN1, MUC5B | 15/39 |
| KMT2D | RB1   | 0.194298623 | 1.840595109 | 26 | 25 | 39 | 9  | Co Occurence | KMT2D, RB1   | 25/48 |
| NEB   | RB1   | 0.204024629 | 1.797073846 | 24 | 29 | 35 | 11 | Co Occurence | NEB, RB1     | 29/46 |
| MUC5B | RYR2  | 0.210400715 | 1.721880499 | 37 | 19 | 29 | 14 | Co Occurence | MUC5B, RYR2  | 19/43 |
| OBSCN | RYR2  | 0.223179145 | 1.68326971  | 34 | 22 | 26 | 17 | Co Occurence | OBSCN, RYR2  | 22/43 |
| CSMD1 | LRP2  | 0.26819277  | 1.765715592 | 45 | 15 | 20 | 19 | Co Occurence | CSMD1, LRP2  | 15/39 |
| UNC80 | MUC5B | 0.274804761 | 1.657896314 | 44 | 15 | 18 | 22 | Co Occurence | MUC5B, UNC80 | 15/40 |
| CSMD1 | HMCN1 | 0.276445341 | 1.645561346 | 44 | 15 | 21 | 19 | Co Occurence | CSMD1, HMCN1 | 15/40 |
| DST   | CSMD3 | 0.299512634 | 1.582918537 | 37 | 19 | 26 | 17 | Co Occurence | CSMD3, DST   | 19/43 |

|       |       |             |             |    |    |    |    |                   |              |       |
|-------|-------|-------------|-------------|----|----|----|----|-------------------|--------------|-------|
| CSMD1 | RYR2  | 0.299645943 | 1.565144834 | 36 | 19 | 29 | 15 | Co Occurence      | CSMD1, RYR2  | 19/44 |
| LRP2  | TTN   | 0.30454419  | 1.98689183  | 16 | 30 | 48 | 5  | Co Occurence      | LRP2, TTN    | 30/53 |
| CSMD3 | NEB   | 0.305063235 | 1.603942226 | 35 | 21 | 19 | 24 | Co Occurence      | CSMD3, NEB   | 21/43 |
| TP53  | DST   | 0.368578399 | 0.521495459 | 7  | 29 | 7  | 56 | Mutually Exclusiv | DST, TP53    | 29/63 |
| TP53  | HMCN1 | 0.368578399 | 0.521495459 | 7  | 29 | 7  | 56 | Mutually Exclusiv | HMCN1, TP53  | 29/63 |
| TP53  | UNC80 | 0.373584388 | 0.548950033 | 7  | 30 | 7  | 55 | Mutually Exclusiv | TP53, UNC80  | 30/62 |
| LRP2  | RB1   | 0.380441063 | 1.595055387 | 25 | 25 | 39 | 10 | Co Occurence      | LRP2, RB1    | 25/49 |
| LRP1B | DST   | 0.384001305 | 1.528864869 | 43 | 15 | 21 | 20 | Co Occurence      | DST, LRP1B   | 15/41 |
| TP53  | OBSCN | 0.393155801 | 0.606987319 | 7  | 32 | 7  | 53 | Mutually Exclusiv | OBSCN, TP53  | 32/60 |
| LRP1B | RYR2  | 0.409334151 | 1.427933442 | 35 | 19 | 29 | 16 | Co Occurence      | LRP1B, RYR2  | 19/45 |
| LRP2  | RYR2  | 0.409334151 | 1.427933442 | 35 | 19 | 29 | 16 | Co Occurence      | LRP2, RYR2   | 19/45 |
| ZFHX4 | CSMD3 | 0.426083991 | 1.386615304 | 32 | 22 | 23 | 22 | Co Occurence      | CSMD3, ZFHX4 | 22/45 |
| TP53  | TTN   | 0.487743338 | 1.591679935 | 4  | 68 | 10 | 17 | Co Occurence      | TP53, TTN    | 68/27 |
| CSMD1 | RB1   | 0.50700651  | 1.493954397 | 25 | 24 | 40 | 10 | Co Occurence      | CSMD1, RB1   | 24/50 |
| DST   | RB1   | 0.516230033 | 1.393913867 | 24 | 25 | 39 | 11 | Co Occurence      | DST, RB1     | 25/50 |
| HMCN1 | RB1   | 0.516230033 | 1.393913867 | 24 | 25 | 39 | 11 | Co Occurence      | HMCN1, RB1   | 25/50 |
| DST   | UNC80 | 0.524410553 | 1.327252201 | 41 | 15 | 22 | 21 | Co Occurence      | DST, UNC80   | 15/43 |
| HMCN1 | CSMD3 | 0.533870912 | 1.32942055  | 36 | 18 | 27 | 18 | Co Occurence      | CSMD3, HMCN1 | 18/45 |
| MUC5B | TP53  | 0.541637981 | 0.623832867 | 8  | 27 | 58 | 6  | Mutually Exclusiv | MUC5B, TP53  | 27/64 |
| CSMD1 | TP53  | 0.547459602 | 0.657880973 | 8  | 28 | 57 | 6  | Mutually Exclusiv | CSMD1, TP53  | 28/63 |
| TP53  | LRP2  | 0.556017095 | 0.693130698 | 8  | 29 | 6  | 56 | Mutually Exclusiv | LRP2, TP53   | 29/62 |
| TP53  | SYNE1 | 0.556017095 | 0.693130698 | 8  | 29 | 6  | 56 | Mutually Exclusiv | SYNE1, TP53  | 29/62 |
| TP53  | NEB   | 0.558435006 | 0.637638895 | 7  | 33 | 7  | 52 | Mutually Exclusiv | NEB, TP53    | 33/59 |
| USH2A | TP53  | 0.56549796  | 1.592568224 | 9  | 40 | 45 | 5  | Co Occurence      | TP53, USH2A  | 40/50 |
| NEB   | TTN   | 0.61726438  | 1.461120265 | 14 | 33 | 45 | 7  | Co Occurence      | NEB, TTN     | 33/52 |
| LRP1B | RB1   | 0.661345764 | 1.305565465 | 24 | 24 | 40 | 11 | Co Occurence      | LRP1B, RB1   | 24/51 |
| LRP2  | ZFHX4 | 0.672609854 | 1.29083407  | 37 | 17 | 27 | 18 | Co Occurence      | LRP2, ZFHX4  | 17/45 |
| MUC5B | CSMD3 | 0.675489393 | 1.19857917  | 37 | 16 | 29 | 17 | Co Occurence      | CSMD3, MUC5B | 16/46 |
| RYR2  | UNC80 | 0.682856762 | 1.198918026 | 33 | 19 | 18 | 29 | Co Occurence      | RYR2, UNC80  | 19/47 |
| MUC16 | TP53  | 0.772110496 | 1.356806345 | 7  | 49 | 36 | 7  | Co Occurence      | MUC16, TP53  | 49/43 |
| ZFHX4 | TP53  | 0.773823951 | 0.772888025 | 7  | 37 | 48 | 7  | Mutually Exclusiv | TP53, ZFHX4  | 37/55 |
| CSMD3 | TP53  | 0.776987252 | 0.81026322  | 7  | 38 | 47 | 7  | Mutually Exclusiv | CSMD3, TP53  | 38/54 |
| UNC80 | RB1   | 0.828256033 | 0.842948639 | 21 | 23 | 41 | 14 | Mutually Exclusiv | RB1, UNC80   | 23/55 |
| TP53  | RYR2  | 1           | 0.932502131 | 7  | 41 | 7  | 44 | Mutually Exclusiv | RYR2, TP53   | 41/51 |
| LRP1B | TP53  | 1           | 0.981992187 | 9  | 30 | 55 | 5  | Mutually Exclusiv | LRP1B, TP53  | 30/60 |
| KMT2D | TP53  | 1           | 0.932810928 | 9  | 29 | 56 | 5  | Mutually Exclusiv | KMT2D, TP53  | 29/61 |
| MACF1 | TP53  | 1           | 0.885331096 | 9  | 28 | 57 | 5  | Mutually Exclusiv | MACF1, TP53  | 28/62 |
