# Supplementary material for: Genomic and immunological profiles of small-cell lung cancer between East Asians and Caucasian
Source: Springer Nature journal article supplement (doi:10.1186/s12935-022-02588-w), 2022-04-29
Supplement: MOESM11 [file 20359852]

Supplementary Table.2 Related to Supplementary Fig. 1b The results of the co-occurrence/mutual exclusivity of oncogenes/TSGs in the Caucasian cohort (Top20 mutated genes).

| gene1    | gene2   | pValue      | oddsRatio   | 00 | 11 | 01 | 10 | Event              | pair             | event ratio |
|----------|---------|-------------|-------------|----|----|----|----|--------------------|------------------|-------------|
| NAV3     | RYR2    | 0.010204325 | 6.122955167 | 21 | 11 | 9  | 4  | Co Occurrence      | NAV3, RYR2       | 11/13       |
| MLL2     | USH2A   | 0.014003912 | 5.953635673 | 25 | 8  | 8  | 4  | Co Occurrence      | MLL2, USH2A      | 8/12        |
| FMN2     | RYR2    | 0.018790252 | 5.745656248 | 22 | 9  | 11 | 3  | Co Occurrence      | FMN2, RYR2       | 9/14        |
| MUC16    | FAM135B | 0.023042895 | 5.337533788 | 20 | 10 | 3  | 12 | Co Occurrence      | FAM135B, MUC16   | 10/15       |
| SPTA1    | EYS     | 0.028797624 | 4.975872919 | 26 | 7  | 7  | 5  | Co Occurrence      | EYS, SPTA1       | 7/12        |
| KIAA1211 | USH2A   | 0.033251346 | 0.113584343 | 18 | 1  | 15 | 11 | Mutually Exclusive | KIAA1211, USH2A  | 1/26        |
| RYR3     | ZFH4    | 0.040975951 | 4.429558567 | 23 | 8  | 10 | 4  | Co Occurrence      | RYR3, ZFH4       | 8/14        |
| ZFH4     | EYS     | 0.046944668 | 4.241930041 | 22 | 9  | 5  | 9  | Co Occurrence      | EYS, ZFH4        | 9/14        |
| FMN2     | TTN     | 0.055204104 | 0.231356236 | 6  | 6  | 27 | 6  | Mutually Exclusive | FMN2, TTN        | 6/33        |
| USH2A    | MUC16   | 0.065387177 | 3.49360658  | 18 | 11 | 11 | 5  | Co Occurrence      | MUC16, USH2A     | 11/16       |
| TTN      | EYS     | 0.070014993 | 6.904254633 | 11 | 13 | 1  | 20 | Co Occurrence      | EYS, TTN         | 13/21       |
| COL11A1  | EYS     | 0.072415266 | 4.016187181 | 25 | 7  | 7  | 6  | Co Occurrence      | COL11A1, EYS     | 7/13        |
| RYR3     | COL11A1 | 0.075672781 | 3.590673798 | 26 | 6  | 7  | 6  | Co Occurrence      | COL11A1, RYR3    | 6/13        |
| SPTA1    | FAM135B | 0.075672781 | 3.590673798 | 26 | 6  | 7  | 6  | Co Occurrence      | FAM135B, SPTA1   | 6/13        |
| FAM135B  | ZFH4    | 0.093872868 | 3.414487703 | 22 | 8  | 10 | 5  | Co Occurrence      | FAM135B, ZFH4    | 8/15        |
| COL11A1  | RYR2    | 0.099796255 | 0.272529404 | 15 | 3  | 17 | 10 | Mutually Exclusive | COL11A1, RYR2    | 3/27        |
| CSMD3    | EYS     | 0.107057994 | 3.182512788 | 20 | 9  | 5  | 11 | Co Occurrence      | CSMD3, EYS       | 9/16        |
| TP53     | RB1     | 0.135888502 | 4.322464009 | 3  | 30 | 2  | 10 | Co Occurrence      | RB1, TP53        | 30/12       |
| SPTA1    | TTN     | 0.135956499 | 5.337192976 | 11 | 11 | 22 | 1  | Co Occurrence      | SPTA1, TTN       | 11/23       |
| FAM135B  | COL11A1 | 0.149300382 | 2.97675975  | 25 | 6  | 7  | 7  | Co Occurrence      | COL11A1, FAM135B | 6/14        |
| MLL2     | NAV3    | 0.173601812 | 2.603998848 | 24 | 6  | 9  | 6  | Co Occurrence      | MLL2, NAV3       | 6/15        |
| KIAA1211 | ZFH4    | 0.175186667 | 2.732541136 | 22 | 7  | 11 | 5  | Co Occurrence      | KIAA1211, ZFH4   | 7/16        |
| SPTA1    | ZFH4    | 0.175186667 | 2.732541136 | 22 | 7  | 11 | 5  | Co Occurrence      | SPTA1, ZFH4      | 7/16        |
| CSMD3    | SI      | 0.175707094 | 2.759894916 | 21 | 7  | 4  | 13 | Co Occurrence      | CSMD3, SI        | 7/17        |
| RYR2     | SI      | 0.175707094 | 2.759894916 | 21 | 7  | 4  | 13 | Co Occurrence      | RYR2, SI         | 7/17        |
| TTN      | CSMD3   | 0.176772623 | 3.108188933 | 9  | 17 | 3  | 16 | Co Occurrence      | CSMD3, TTN       | 17/19       |
| MUC16    | RB1     | 0.189388481 | 2.824531981 | 9  | 18 | 14 | 4  | Co Occurrence      | MUC16, RB1       | 18/18       |
| KIAA1211 | LRP1B   | 0.189388481 | 2.653712697 | 19 | 8  | 14 | 4  | Co Occurrence      | KIAA1211, LRP1B  | 8/18        |
| FMN2     | MUC16   | 0.189388481 | 2.653712697 | 19 | 8  | 14 | 4  | Co Occurrence      | FMN2, MUC16      | 8/18        |
| RYR3     | MUC16   | 0.189388481 | 2.653712697 | 19 | 8  | 14 | 4  | Co Occurrence      | MUC16, RYR3      | 8/18        |
| FAM135B  | CSMD3   | 0.191470459 | 2.606771382 | 20 | 8  | 12 | 5  | Co Occurrence      | CSMD3, FAM135B   | 8/17        |
| RYR2     | EYS     | 0.201964301 | 0.383227557 | 15 | 4  | 10 | 16 | Mutually Exclusive | EYS, RYR2        | 4/26        |
| NAV3     | LRP1B   | 0.20781147  | 0.390775243 | 13 | 5  | 17 | 10 | Mutually Exclusive | LRP1B, NAV3      | 5/27        |
| EYS      | MUC16   | 0.20781147  | 2.441123209 | 18 | 9  | 13 | 5  | Co Occurrence      | EYS, MUC16       | 9/18        |
| NAV3     | ZFH4    | 0.217566187 | 2.242172714 | 20 | 8  | 10 | 7  | Co Occurrence      | NAV3, ZFH4       | 8/17        |
| SI       | RYR3    | 0.239984849 | 0.214951297 | 23 | 1  | 11 | 10 | Mutually Exclusive | RYR3, SI         | 1/21        |

|          |          |             |             |    |    |    |    |                    |                   |       |
|----------|----------|-------------|-------------|----|----|----|----|--------------------|-------------------|-------|
| ZFH4     | CSMD3    | 0.241204721 | 2.088682498 | 17 | 10 | 10 | 8  | Co Occurrence      | CSMD3, ZFH4       | 10/18 |
| SI       | RB1      | 0.251016659 | 0.378517584 | 8  | 6  | 26 | 5  | Mutually Exclusive | RB1, SI           | 6/31  |
| MLL2     | FMN2     | 0.253601126 | 2.58946096  | 26 | 5  | 7  | 7  | Co Occurrence      | FMN2, MLL2        | 5/14  |
| SPTA1    | RYR3     | 0.253601126 | 2.58946096  | 26 | 5  | 7  | 7  | Co Occurrence      | RYR3, SPTA1       | 5/14  |
| PKHD1L1  | TTN      | 0.284614727 | 0.456788486 | 7  | 8  | 25 | 5  | Mutually Exclusive | PKHD1L1, TTN      | 8/30  |
| SPTA1    | COL11A1  | 0.284614727 | 2.189197037 | 25 | 5  | 8  | 7  | Co Occurrence      | COL11A1, SPTA1    | 5/15  |
| FMN2     | FAM135B  | 0.284614727 | 2.189197037 | 25 | 5  | 8  | 7  | Co Occurrence      | FAM135B, FMN2     | 5/15  |
| KIAA1211 | FAM135B  | 0.284614727 | 2.189197037 | 25 | 5  | 8  | 7  | Co Occurrence      | FAM135B, KIAA1211 | 5/15  |
| RYR3     | FAM135B  | 0.284614727 | 2.189197037 | 25 | 5  | 8  | 7  | Co Occurrence      | FAM135B, RYR3     | 5/15  |
| FMN2     | PKHD1L1  | 0.284614727 | 2.189197037 | 25 | 5  | 8  | 7  | Co Occurrence      | FMN2, PKHD1L1     | 5/15  |
| PKHD1L1  | RB1      | 0.28715043  | 2.82024253  | 11 | 11 | 21 | 2  | Co Occurrence      | PKHD1L1, RB1      | 11/23 |
| EYS      | FMN2     | 0.287229671 | 0.357485248 | 21 | 2  | 10 | 12 | Mutually Exclusive | EYS, FMN2         | 2/22  |
| EYS      | MLL2     | 0.287229671 | 0.357485248 | 21 | 2  | 10 | 12 | Mutually Exclusive | EYS, MLL2         | 2/22  |
| USH2A    | RYR3     | 0.296328983 | 2.254988641 | 23 | 6  | 6  | 10 | Co Occurrence      | RYR3, USH2A       | 6/16  |
| TP53     | FAM135B  | 0.300713152 | Inf         | 5  | 13 | 0  | 27 | Co Occurrence      | FAM135B, TP53     | 13/27 |
| KIAA1211 | TP53     | 0.30335197  | Inf         | 5  | 12 | 28 | 0  | Co Occurrence      | KIAA1211, TP53    | 12/28 |
| MLL2     | TP53     | 0.30335197  | Inf         | 5  | 12 | 28 | 0  | Co Occurrence      | MLL2, TP53        | 12/28 |
| SI       | LRP1B    | 0.314097945 | 2.177476326 | 19 | 7  | 15 | 4  | Co Occurrence      | LRP1B, SI         | 7/19  |
| RYR2     | TTN      | 0.319979663 | 0.472496742 | 5  | 13 | 20 | 7  | Mutually Exclusive | RYR2, TTN         | 13/27 |
| SPTA1    | CSMD3    | 0.319979663 | 2.116416708 | 20 | 7  | 13 | 5  | Co Occurrence      | CSMD3, SPTA1      | 7/18  |
| KIAA1211 | RYR2     | 0.319979663 | 2.116416708 | 20 | 7  | 13 | 5  | Co Occurrence      | KIAA1211, RYR2    | 7/18  |
| MLL2     | RYR2     | 0.319979663 | 2.116416708 | 20 | 7  | 13 | 5  | Co Occurrence      | MLL2, RYR2        | 7/18  |
| TP53     | USH2A    | 0.33006755  | 0.329946106 | 2  | 13 | 3  | 27 | Mutually Exclusive | TP53, USH2A       | 13/30 |
| FAM135B  | LRP1B    | 0.336772393 | 2.024036807 | 18 | 8  | 14 | 5  | Co Occurrence      | FAM135B, LRP1B    | 8/19  |
| LRP1B    | TP53     | 0.34625323  | 4.29064138  | 4  | 21 | 19 | 1  | Co Occurrence      | LRP1B, TP53       | 21/20 |
| CSMD3    | TP53     | 0.362394711 | 3.528706701 | 4  | 19 | 21 | 1  | Co Occurrence      | CSMD3, TP53       | 19/22 |
| SI       | KIAA1211 | 0.448313875 | 1.829850474 | 26 | 4  | 8  | 7  | Co Occurrence      | KIAA1211, SI      | 4/15  |
| COL11A1  | TTN      | 0.459578249 | 2.454210311 | 10 | 11 | 22 | 2  | Co Occurrence      | COL11A1, TTN      | 11/24 |
| FMN2     | COL11A1  | 0.459578249 | 0.407463042 | 22 | 2  | 11 | 10 | Mutually Exclusive | COL11A1, FMN2     | 2/21  |
| RYR3     | PKHD1L1  | 0.459578249 | 0.407463042 | 22 | 2  | 11 | 10 | Mutually Exclusive | PKHD1L1, RYR3     | 2/21  |
| SPTA1    | PKHD1L1  | 0.459578249 | 0.407463042 | 22 | 2  | 11 | 10 | Mutually Exclusive | PKHD1L1, SPTA1    | 2/21  |
| RB1      | FMN2     | 0.459578249 | 2.454210311 | 11 | 10 | 2  | 22 | Co Occurrence      | FMN2, RB1         | 10/24 |
| RB1      | RYR3     | 0.459578249 | 2.454210311 | 11 | 10 | 2  | 22 | Co Occurrence      | RB1, RYR3         | 10/24 |
| KIAA1211 | TTN      | 0.466015034 | 2.139932101 | 10 | 10 | 23 | 2  | Co Occurrence      | KIAA1211, TTN     | 10/25 |
| MLL2     | TTN      | 0.466015034 | 2.139932101 | 10 | 10 | 23 | 2  | Co Occurrence      | MLL2, TTN         | 10/25 |
| MLL2     | KIAA1211 | 0.466015034 | 0.467304547 | 23 | 2  | 10 | 10 | Mutually Exclusive | KIAA1211, MLL2    | 2/20  |
| RYR3     | KIAA1211 | 0.466015034 | 0.467304547 | 23 | 2  | 10 | 10 | Mutually Exclusive | KIAA1211, RYR3    | 2/20  |
| EYS      | KIAA1211 | 0.470275747 | 1.876019598 | 24 | 5  | 7  | 9  | Co Occurrence      | EYS, KIAA1211     | 5/16  |
| EYS      | RYR3     | 0.470275747 | 1.876019598 | 24 | 5  | 7  | 9  | Co Occurrence      | EYS, RYR3         | 5/16  |

|          |          |             |             |    |    |    |    |                    |                   |       |
|----------|----------|-------------|-------------|----|----|----|----|--------------------|-------------------|-------|
| PKHD1L1  | COL11A1  | 0.472573728 | 1.847410393 | 24 | 5  | 8  | 8  | Co Occurrence      | COL11A1, PKHD1L1  | 5/16  |
| COL11A1  | NAV3     | 0.491747428 | 0.507395814 | 20 | 3  | 12 | 10 | Mutually Exclusive | COL11A1, NAV3     | 3/22  |
| NAV3     | FMN2     | 0.495862833 | 1.624142884 | 23 | 5  | 7  | 10 | Co Occurrence      | FMN2, NAV3        | 5/17  |
| NAV3     | KIAA1211 | 0.495862833 | 1.624142884 | 23 | 5  | 7  | 10 | Co Occurrence      | KIAA1211, NAV3    | 5/17  |
| NAV3     | RYR3     | 0.495862833 | 1.624142884 | 23 | 5  | 7  | 10 | Co Occurrence      | NAV3, RYR3        | 5/17  |
| NAV3     | SPTA1    | 0.495862833 | 1.624142884 | 23 | 5  | 7  | 10 | Co Occurrence      | NAV3, SPTA1       | 5/17  |
| FMN2     | CSMD3    | 0.50218505  | 0.538679975 | 17 | 4  | 16 | 8  | Mutually Exclusive | CSMD3, FMN2       | 4/24  |
| RYR3     | RYR2     | 0.50218505  | 0.538679975 | 17 | 4  | 16 | 8  | Mutually Exclusive | RYR2, RYR3        | 4/24  |
| SPTA1    | RYR2     | 0.50218505  | 0.538679975 | 17 | 4  | 16 | 8  | Mutually Exclusive | RYR2, SPTA1       | 4/24  |
| FAM135B  | EYS      | 0.502447482 | 1.580062406 | 23 | 5  | 9  | 8  | Co Occurrence      | EYS, FAM135B      | 5/17  |
| KIAA1211 | MUC16    | 0.513633089 | 1.660587072 | 18 | 7  | 15 | 5  | Co Occurrence      | KIAA1211, MUC16   | 7/20  |
| SPTA1    | MUC16    | 0.513633089 | 1.660587072 | 18 | 7  | 15 | 5  | Co Occurrence      | MUC16, SPTA1      | 7/20  |
| ZFHx4    | RB1      | 0.513644223 | 1.728791413 | 9  | 14 | 18 | 4  | Co Occurrence      | RB1, ZFHx4        | 14/22 |
| PKHD1L1  | ZFHx4    | 0.513644223 | 0.578438783 | 18 | 4  | 14 | 9  | Mutually Exclusive | PKHD1L1, ZFHx4    | 4/23  |
| FAM135B  | RYR2     | 0.515100547 | 1.684610069 | 19 | 7  | 13 | 6  | Co Occurrence      | FAM135B, RYR2     | 7/19  |
| USH2A    | ZFHx4    | 0.527138541 | 0.566649372 | 16 | 5  | 13 | 11 | Mutually Exclusive | USH2A, ZFHx4      | 5/24  |
| LRP1B    | ZFHx4    | 0.549897072 | 1.54691413  | 15 | 10 | 8  | 12 | Co Occurrence      | LRP1B, ZFHx4      | 10/20 |
| CSMD3    | LRP1B    | 0.554443567 | 1.540189285 | 14 | 11 | 11 | 9  | Co Occurrence      | CSMD3, LRP1B      | 11/20 |
| ZFHx4    | RYR2     | 0.558651327 | 1.442337818 | 16 | 9  | 11 | 9  | Co Occurrence      | RYR2, ZFHx4       | 9/20  |
| TTN      | TP53     | 0.598087675 | 1.965821187 | 2  | 30 | 10 | 3  | Co Occurrence      | TP53, TTN         | 30/13 |
| TP53     | ZFHx4    | 0.633704356 | 2.894430592 | 4  | 17 | 1  | 23 | Co Occurrence      | TP53, ZFHx4       | 17/24 |
| RYR2     | TP53     | 0.642318984 | 0.500658309 | 2  | 17 | 23 | 3  | Mutually Exclusive | RYR2, TP53        | 17/26 |
| NAV3     | TP53     | 0.651076849 | 2.12157277  | 4  | 14 | 26 | 1  | Co Occurrence      | NAV3, TP53        | 14/27 |
| TTN      | SI       | 0.699080296 | 1.850990731 | 10 | 9  | 2  | 24 | Co Occurrence      | SI, TTN           | 9/26  |
| SI       | COL11A1  | 0.703639685 | 1.570266153 | 25 | 4  | 9  | 7  | Co Occurrence      | COL11A1, SI       | 4/16  |
| SI       | FAM135B  | 0.703639685 | 1.570266153 | 25 | 4  | 9  | 7  | Co Occurrence      | FAM135B, SI       | 4/16  |
| RYR3     | FMN2     | 0.704980682 | 1.546312141 | 25 | 4  | 8  | 8  | Co Occurrence      | FMN2, RYR3        | 4/16  |
| SPTA1    | FMN2     | 0.704980682 | 1.546312141 | 25 | 4  | 8  | 8  | Co Occurrence      | FMN2, SPTA1       | 4/16  |
| SPTA1    | KIAA1211 | 0.704980682 | 1.546312141 | 25 | 4  | 8  | 8  | Co Occurrence      | KIAA1211, SPTA1   | 4/16  |
| SPTA1    | MLL2     | 0.704980682 | 1.546312141 | 25 | 4  | 8  | 8  | Co Occurrence      | MLL2, SPTA1       | 4/16  |
| EYS      | SI       | 0.717110609 | 1.361583867 | 24 | 4  | 7  | 10 | Co Occurrence      | EYS, SI           | 4/17  |
| KIAA1211 | RB1      | 0.721072645 | 0.754923996 | 9  | 8  | 24 | 4  | Mutually Exclusive | KIAA1211, RB1     | 8/28  |
| MLL2     | RB1      | 0.721072645 | 0.754923996 | 9  | 8  | 24 | 4  | Mutually Exclusive | MLL2, RB1         | 8/28  |
| SPTA1    | RB1      | 0.721072645 | 0.754923996 | 9  | 8  | 24 | 4  | Mutually Exclusive | RB1, SPTA1        | 8/28  |
| KIAA1211 | COL11A1  | 0.721072645 | 1.324636659 | 24 | 4  | 9  | 8  | Co Occurrence      | COL11A1, KIAA1211 | 4/17  |
| MLL2     | COL11A1  | 0.721072645 | 1.324636659 | 24 | 4  | 9  | 8  | Co Occurrence      | COL11A1, MLL2     | 4/17  |
| MLL2     | FAM135B  | 0.721072645 | 1.324636659 | 24 | 4  | 9  | 8  | Co Occurrence      | FAM135B, MLL2     | 4/17  |
| KIAA1211 | PKHD1L1  | 0.721072645 | 1.324636659 | 24 | 4  | 9  | 8  | Co Occurrence      | KIAA1211, PKHD1L1 | 4/17  |
| FAM135B  | RB1      | 0.725298817 | 1.50173756  | 10 | 10 | 22 | 3  | Co Occurrence      | FAM135B, RB1      | 10/25 |

|         |         |             |             |    |    |    |    |                    |                |       |
|---------|---------|-------------|-------------|----|----|----|----|--------------------|----------------|-------|
| SI      | NAV3    | 0.726236073 | 0.693062698 | 22 | 3  | 12 | 8  | Mutually Exclusive | NAV3, SI       | 3/20  |
| FMN2    | USH2A   | 0.728383241 | 1.416944804 | 22 | 5  | 11 | 7  | Co Occurence       | FMN2, USH2A    | 5/18  |
| SPTA1   | USH2A   | 0.728383241 | 1.416944804 | 22 | 5  | 11 | 7  | Co Occurence       | SPTA1, USH2A   | 5/18  |
| SI      | ZFHX4   | 0.732294357 | 1.337120048 | 21 | 5  | 13 | 6  | Co Occurence       | SI, ZFHX4      | 5/19  |
| FMN2    | ZFHX4   | 0.735443836 | 0.684346635 | 19 | 4  | 14 | 8  | Mutually Exclusive | FMN2, ZFHX4    | 4/22  |
| EYS     | USH2A   | 0.737848673 | 0.63965099  | 19 | 4  | 12 | 10 | Mutually Exclusive | EYS, USH2A     | 4/22  |
| TTN     | LRP1B   | 0.738110125 | 1.474413036 | 7  | 17 | 5  | 16 | Co Occurence       | LRP1B, TTN     | 17/21 |
| FMN2    | LRP1B   | 0.738110125 | 0.678236    | 16 | 5  | 17 | 7  | Mutually Exclusive | FMN2, LRP1B    | 5/24  |
| TTN     | MUC16   | 0.738110125 | 1.474413036 | 7  | 17 | 5  | 16 | Co Occurence       | MUC16, TTN     | 17/21 |
| COL11A1 | ZFHX4   | 0.739452262 | 1.41705457  | 20 | 6  | 12 | 7  | Co Occurence       | COL11A1, ZFHX4 | 6/19  |
| CSMD3   | RYR3    | 0.74086345  | 1.347857809 | 19 | 6  | 6  | 14 | Co Occurence       | CSMD3, RYR3    | 6/20  |
| EYS     | NAV3    | 0.742529947 | 0.732339931 | 20 | 4  | 11 | 10 | Mutually Exclusive | EYS, NAV3      | 4/21  |
| USH2A   | FAM135B | 0.7431987   | 0.745611077 | 20 | 4  | 9  | 12 | Mutually Exclusive | FAM135B, USH2A | 4/21  |
| CSMD3   | RB1     | 0.744789762 | 1.401044309 | 8  | 15 | 17 | 5  | Co Occurence       | CSMD3, RB1     | 15/22 |
| COL11A1 | CSMD3   | 0.744789762 | 0.713753301 | 17 | 5  | 15 | 8  | Mutually Exclusive | COL11A1, CSMD3 | 5/23  |
| NAV3    | USH2A   | 0.746305168 | 1.32466856  | 20 | 6  | 10 | 9  | Co Occurence       | NAV3, USH2A    | 6/19  |
| LRP1B   | RB1     | 0.749447349 | 0.761031766 | 6  | 15 | 17 | 7  | Mutually Exclusive | LRP1B, RB1     | 15/24 |
| COL11A1 | LRP1B   | 0.749447349 | 1.314005597 | 17 | 7  | 15 | 6  | Co Occurence       | COL11A1, LRP1B | 7/21  |
| PKHD1L1 | LRP1B   | 0.749447349 | 1.314005597 | 17 | 7  | 15 | 6  | Co Occurence       | LRP1B, PKHD1L1 | 7/21  |
| COL11A1 | MUC16   | 0.749447349 | 1.314005597 | 17 | 7  | 15 | 6  | Co Occurence       | COL11A1, MUC16 | 7/21  |
| PKHD1L1 | MUC16   | 0.749447349 | 1.314005597 | 17 | 7  | 15 | 6  | Co Occurence       | MUC16, PKHD1L1 | 7/21  |
| NAV3    | CSMD3   | 0.756881376 | 0.766512423 | 16 | 6  | 14 | 9  | Mutually Exclusive | CSMD3, NAV3    | 6/23  |
| NAV3    | MUC16   | 0.757529692 | 1.298358735 | 16 | 8  | 14 | 7  | Co Occurence       | MUC16, NAV3    | 8/21  |
| RYR2    | LRP1B   | 0.766613297 | 0.759993281 | 12 | 9  | 13 | 11 | Mutually Exclusive | LRP1B, RYR2    | 9/24  |
| MUC16   | TP53    | 1           | 1.486664985 | 3  | 20 | 20 | 2  | Co Occurence       | MUC16, TP53    | 20/22 |
| FMN2    | TP53    | 1           | 1.504356001 | 4  | 11 | 29 | 1  | Co Occurence       | FMN2, TP53     | 11/30 |
| RYR3    | TP53    | 1           | 1.504356001 | 4  | 11 | 29 | 1  | Co Occurence       | RYR3, TP53     | 11/30 |
| SPTA1   | TP53    | 1           | 1.504356001 | 4  | 11 | 29 | 1  | Co Occurence       | SPTA1, TP53    | 11/30 |
| NAV3    | RB1     | 1           | 1.174324964 | 9  | 11 | 21 | 4  | Co Occurence       | NAV3, RB1      | 11/25 |
| EYS     | RB1     | 1           | 1.022219448 | 9  | 10 | 22 | 4  | Co Occurence       | EYS, RB1       | 10/26 |
| COL11A1 | RB1     | 1           | 0.882964572 | 9  | 9  | 23 | 4  | Mutually Exclusive | COL11A1, RB1   | 9/27  |
| ZFHX4   | MUC16   | 1           | 1.075149903 | 14 | 9  | 13 | 9  | Co Occurence       | MUC16, ZFHX4   | 9/22  |
| TTN     | ZFHX4   | 1           | 0.91191917  | 7  | 13 | 5  | 20 | Mutually Exclusive | TTN, ZFHX4     | 13/25 |
| MLL2    | ZFHX4   | 1           | 1.096588418 | 20 | 5  | 13 | 7  | Co Occurence       | MLL2, ZFHX4    | 5/20  |
| PKHD1L1 | EYS     | 1           | 0.978263524 | 22 | 4  | 10 | 9  | Mutually Exclusive | EYS, PKHD1L1   | 4/19  |
| TP53    | COL11A1 | 1           | 1.695802454 | 4  | 12 | 1  | 28 | Co Occurence       | COL11A1, TP53  | 12/29 |
| TP53    | PKHD1L1 | 1           | 1.695802454 | 4  | 12 | 1  | 28 | Co Occurence       | PKHD1L1, TP53  | 12/29 |
| SI      | PKHD1L1 | 1           | 0.902065602 | 24 | 3  | 10 | 8  | Mutually Exclusive | PKHD1L1, SI    | 3/18  |
| EYS     | TP53    | 1           | 1.901025336 | 4  | 13 | 27 | 1  | Co Occurence       | EYS, TP53      | 13/28 |

|          |         |   |             |    |    |    |    |                    |                  |       |
|----------|---------|---|-------------|----|----|----|----|--------------------|------------------|-------|
| SI       | TP53    | 1 | 1.325297292 | 4  | 10 | 30 | 1  | Co Occurrence      | SI, TP53         | 10/31 |
| RB1      | TTN     | 1 | 0.77108653  | 3  | 23 | 10 | 9  | Mutually Exclusive | RB1, TTN         | 23/19 |
| USH2A    | TTN     | 1 | 1.139491989 | 8  | 12 | 21 | 4  | Co Occurrence      | TTN, USH2A       | 12/25 |
| NAV3     | TTN     | 1 | 1           | 8  | 11 | 22 | 4  | Mutually Exclusive | NAV3, TTN        | 11/26 |
| FAM135B  | TTN     | 1 | 1.296871312 | 9  | 10 | 23 | 3  | Co Occurrence      | FAM135B, TTN     | 10/26 |
| RYR3     | TTN     | 1 | 1.122126929 | 9  | 9  | 24 | 3  | Co Occurrence      | RYR3, TTN        | 9/27  |
| RYR2     | RB1     | 1 | 0.909374624 | 7  | 14 | 18 | 6  | Mutually Exclusive | RB1, RYR2        | 14/24 |
| USH2A    | RB1     | 1 | 0.841436717 | 8  | 11 | 21 | 5  | Mutually Exclusive | RB1, USH2A       | 11/26 |
| MUC16    | LRP1B   | 1 | 1.088800205 | 12 | 11 | 11 | 11 | Co Occurrence      | LRP1B, MUC16     | 11/22 |
| USH2A    | LRP1B   | 1 | 1.06977476  | 15 | 8  | 14 | 8  | Co Occurrence      | LRP1B, USH2A     | 8/22  |
| EYS      | LRP1B   | 1 | 1.065116411 | 16 | 7  | 15 | 7  | Co Occurrence      | EYS, LRP1B       | 7/22  |
| MLL2     | LRP1B   | 1 | 1.061040662 | 17 | 6  | 16 | 6  | Co Occurrence      | LRP1B, MLL2      | 6/22  |
| RYR3     | LRP1B   | 1 | 1.061040662 | 17 | 6  | 16 | 6  | Co Occurrence      | LRP1B, RYR3      | 6/22  |
| SPTA1    | LRP1B   | 1 | 1.061040662 | 17 | 6  | 16 | 6  | Co Occurrence      | LRP1B, SPTA1     | 6/22  |
| CSMD3    | MUC16   | 1 | 1.081406785 | 13 | 10 | 12 | 10 | Co Occurrence      | CSMD3, MUC16     | 10/22 |
| RYR2     | MUC16   | 1 | 1.081406785 | 13 | 10 | 12 | 10 | Co Occurrence      | MUC16, RYR2      | 10/22 |
| MLL2     | MUC16   | 1 | 1.061040662 | 17 | 6  | 16 | 6  | Co Occurrence      | MLL2, MUC16      | 6/22  |
| SI       | MUC16   | 1 | 0.836715935 | 17 | 5  | 17 | 6  | Mutually Exclusive | MUC16, SI        | 5/23  |
| RYR2     | CSMD3   | 1 | 1.040410711 | 14 | 9  | 11 | 11 | Co Occurrence      | CSMD3, RYR2      | 9/22  |
| USH2A    | CSMD3   | 1 | 0.958177275 | 16 | 7  | 13 | 9  | Mutually Exclusive | CSMD3, USH2A     | 7/22  |
| PKHD1L1  | CSMD3   | 1 | 1.099656812 | 18 | 6  | 14 | 7  | Co Occurrence      | CSMD3, PKHD1L1   | 6/21  |
| KIAA1211 | CSMD3   | 1 | 0.860073958 | 18 | 5  | 15 | 7  | Mutually Exclusive | CSMD3, KIAA1211  | 5/22  |
| MLL2     | CSMD3   | 1 | 0.860073958 | 18 | 5  | 15 | 7  | Mutually Exclusive | CSMD3, MLL2      | 5/22  |
| USH2A    | RYR2    | 1 | 0.958177275 | 16 | 7  | 13 | 9  | Mutually Exclusive | RYR2, USH2A      | 7/22  |
| PKHD1L1  | RYR2    | 1 | 1.099656812 | 18 | 6  | 14 | 7  | Co Occurrence      | PKHD1L1, RYR2    | 6/21  |
| COL11A1  | USH2A   | 1 | 1.188443503 | 21 | 5  | 11 | 8  | Co Occurrence      | COL11A1, USH2A   | 5/19  |
| PKHD1L1  | USH2A   | 1 | 1.188443503 | 21 | 5  | 11 | 8  | Co Occurrence      | PKHD1L1, USH2A   | 5/19  |
| SI       | USH2A   | 1 | 1.046515022 | 22 | 4  | 12 | 7  | Co Occurrence      | SI, USH2A        | 4/19  |
| FAM135B  | NAV3    | 1 | 0.851553046 | 21 | 4  | 11 | 9  | Mutually Exclusive | FAM135B, NAV3    | 4/20  |
| PKHD1L1  | NAV3    | 1 | 0.851553046 | 21 | 4  | 11 | 9  | Mutually Exclusive | NAV3, PKHD1L1    | 4/20  |
| PKHD1L1  | FAM135B | 1 | 1.132548271 | 23 | 4  | 9  | 9  | Co Occurrence      | FAM135B, PKHD1L1 | 4/18  |
| MLL2     | PKHD1L1 | 1 | 0.77108653  | 23 | 3  | 10 | 9  | Mutually Exclusive | MLL2, PKHD1L1    | 3/19  |
| KIAA1211 | FMN2    | 1 | 0.891164782 | 24 | 3  | 9  | 9  | Mutually Exclusive | FMN2, KIAA1211   | 3/18  |
| SI       | FMN2    | 1 | 1.040710039 | 25 | 3  | 9  | 8  | Co Occurrence      | FMN2, SI         | 3/17  |
| RYR3     | MLL2    | 1 | 0.891164782 | 24 | 3  | 9  | 9  | Mutually Exclusive | MLL2, RYR3       | 3/18  |
| SI       | MLL2    | 1 | 1.040710039 | 25 | 3  | 9  | 8  | Co Occurrence      | MLL2, SI         | 3/17  |
| SI       | SPTA1   | 1 | 1.040710039 | 25 | 3  | 9  | 8  | Co Occurrence      | SI, SPTA1        | 3/17  |
