# Supplementary material for: Genomic and immunological profiles of small-cell lung cancer between East Asians and Caucasian
Source: Springer Nature journal article supplement (doi:10.1186/s12935-022-02588-w), 2022-04-29
Supplement: MOESM12 [file 20359852]

Supplementary Table.3 Related to Supplementary Fig. 2a The results of the co-occurrence/mutual exclusivity of oncogenes/TSGs in the EA cohort (significantly mutated driver genes).

| gene1  | gene2  | pValue      | oddsRatio   | 00 | 11 | 01 | 10 | Event        | pair           | event_ratio |
|--------|--------|-------------|-------------|----|----|----|----|--------------|----------------|-------------|
| NSD1   | ZMYM3  | 1.99567E-08 | 54.55625501 | 67 | 11 | 4  | 3  | Co Occurence | NSD1, ZMYM3    | 11/7        |
| AXIN1  | DCC    | 2.2398E-07  | 40.5216358  | 64 | 11 | 2  | 8  | Co Occurence | AXIN1, DCC     | 11/10       |
| NF1    | TRRAP  | 5.69945E-07 | 24.0674252  | 59 | 13 | 3  | 10 | Co Occurence | NF1, TRRAP     | 13/13       |
| ARID1B | RNF213 | 9.02217E-07 | 16.85191958 | 53 | 16 | 12 | 4  | Co Occurence | ARID1B, RNF213 | 16/16       |
| FLNA   | RNF213 | 9.02217E-07 | 16.85191958 | 53 | 16 | 12 | 4  | Co Occurence | FLNA, RNF213   | 16/16       |
| NSD1   | AXIN1  | 9.39197E-07 | 26.89975494 | 63 | 11 | 8  | 3  | Co Occurence | AXIN1, NSD1    | 11/11       |
| MYH9   | AXIN1  | 1.47299E-06 | 19.6646263  | 61 | 12 | 7  | 5  | Co Occurence | AXIN1, MYH9    | 12/12       |
| ZMYM3  | POLE   | 1.48299E-06 | 22.61230122 | 60 | 12 | 10 | 3  | Co Occurence | POLE, ZMYM3    | 12/13       |
| NSD1   | FLNA   | 2.00119E-06 | 23.6890398  | 62 | 11 | 9  | 3  | Co Occurence | FLNA, NSD1     | 11/12       |
| NF1    | RNF213 | 2.41729E-06 | 12.6002722  | 51 | 17 | 11 | 6  | Co Occurence | NF1, RNF213    | 17/17       |
| RNF213 | AXIN1  | 3.6939E-06  | 14.63896448 | 53 | 15 | 4  | 13 | Co Occurence | AXIN1, RNF213  | 15/17       |
| MYH9   | RNF213 | 3.86816E-06 | 17.20891183 | 54 | 14 | 14 | 3  | Co Occurence | MYH9, RNF213   | 14/17       |
| FLNA   | BCORL1 | 4.08149E-06 | 14.633269   | 58 | 13 | 7  | 7  | Co Occurence | BCORL1, FLNA   | 13/14       |
| CREBBP | SETD1B | 5.15457E-06 | 16.79882605 | 59 | 12 | 4  | 10 | Co Occurence | CREBBP, SETD1B | 12/14       |
| FAT1   | BCORL1 | 6.08678E-06 | 12.7088813  | 53 | 15 | 5  | 12 | Co Occurence | BCORL1, FAT1   | 15/17       |
| FAT1   | FANCA  | 7.51668E-06 | 13.92927289 | 54 | 14 | 4  | 13 | Co Occurence | FANCA, FAT1    | 14/17       |
| TERT   | FAT1   | 8.30044E-06 | 16.28188382 | 55 | 13 | 14 | 3  | Co Occurence | FAT1, TERT     | 13/17       |
| TSC2   | SETD1B | 9.06245E-06 | 15.88636128 | 61 | 11 | 5  | 8  | Co Occurence | SETD1B, TSC2   | 11/13       |
| TSC2   | TRRAP  | 9.06245E-06 | 15.88636128 | 61 | 11 | 5  | 8  | Co Occurence | TRRAP, TSC2    | 11/13       |
| MTOR   | ARID1B | 9.17744E-06 | 14.03652994 | 59 | 12 | 8  | 6  | Co Occurence | ARID1B, MTOR   | 12/14       |
| POLD1  | FANCA  | 1.05271E-05 | 15.14240521 | 61 | 11 | 7  | 6  | Co Occurence | FANCA, POLD1   | 11/13       |
| RNF213 | UBR5   | 1.2069E-05  | 11.5401287  | 52 | 15 | 5  | 13 | Co Occurence | RNF213, UBR5   | 15/18       |
| TRRAP  | TERT   | 1.2845E-05  | 16.50722701 | 63 | 10 | 6  | 6  | Co Occurence | TERT, TRRAP    | 10/12       |
| TERT   | BCORL1 | 1.87601E-05 | 13.96483147 | 60 | 11 | 9  | 5  | Co Occurence | BCORL1, TERT   | 11/14       |
| TRRAP  | BCORL1 | 1.87601E-05 | 13.96483147 | 60 | 11 | 9  | 5  | Co Occurence | BCORL1, TRRAP  | 11/14       |
| TSC2   | BCORL1 | 2.21968E-05 | 11.88638476 | 58 | 12 | 8  | 7  | Co Occurence | BCORL1, TSC2   | 12/15       |
| AXIN1  | FLNA   | 2.21968E-05 | 11.88638476 | 58 | 12 | 8  | 7  | Co Occurence | AXIN1, FLNA    | 12/15       |
| DCC    | MYH9   | 2.81551E-05 | 16.96597974 | 64 | 9  | 8  | 4  | Co Occurence | DCC, MYH9      | 9/12        |
| SETD1B | MYH9   | 2.8759E-05  | 14.01098082 | 62 | 10 | 7  | 6  | Co Occurence | MYH9, SETD1B   | 10/13       |
| TERT   | MYH9   | 2.8759E-05  | 14.01098082 | 62 | 10 | 7  | 6  | Co Occurence | MYH9, TERT     | 10/13       |
| NSD1   | BCORL1 | 3.49228E-05 | 14.50633968 | 61 | 10 | 10 | 4  | Co Occurence | BCORL1, NSD1   | 10/14       |
| RNF213 | DNMT1  | 4.31763E-05 | 10.03586744 | 52 | 14 | 5  | 14 | Co Occurence | DNMT1, RNF213  | 14/19       |
| ARID1B | NF1    | 4.38906E-05 | 9.829072872 | 55 | 13 | 10 | 7  | Co Occurence | ARID1B, NF1    | 13/17       |
| BCORL1 | NF1    | 4.38906E-05 | 9.829072872 | 55 | 13 | 10 | 7  | Co Occurence | BCORL1, NF1    | 13/17       |
| UBR5   | NF1    | 4.38906E-05 | 9.829072872 | 55 | 13 | 10 | 7  | Co Occurence | NF1, UBR5      | 13/17       |
| RANBP2 | NF1    | 4.49054E-05 | 12.72559991 | 58 | 11 | 12 | 4  | Co Occurence | NF1, RANBP2    | 11/16       |

|        |        |             |             |    |    |    |    |              |                |       |
|--------|--------|-------------|-------------|----|----|----|----|--------------|----------------|-------|
| CREBBP | FAT1   | 4.58434E-05 | 8.803304781 | 51 | 15 | 12 | 7  | Co Occurence | CREBBP, FAT1   | 15/19 |
| KAT6B  | BCORL1 | 4.68692E-05 | 11.50063555 | 59 | 11 | 9  | 6  | Co Occurence | BCORL1, KAT6B  | 11/15 |
| MYH9   | FLNA   | 4.68692E-05 | 11.50063555 | 59 | 11 | 9  | 6  | Co Occurence | FLNA, MYH9     | 11/15 |
| MYH9   | NCOR2  | 4.68692E-05 | 11.50063555 | 59 | 11 | 9  | 6  | Co Occurence | MYH9, NCOR2    | 11/15 |
| STAG1  | TSC2   | 4.90652E-05 | 12.92120419 | 61 | 10 | 9  | 5  | Co Occurence | STAG1, TSC2    | 10/14 |
| BCORL1 | ARID1B | 4.93697E-05 | 10.26703314 | 57 | 12 | 8  | 8  | Co Occurence | ARID1B, BCORL1 | 12/16 |
| FLNA   | ARID1B | 4.93697E-05 | 10.26703314 | 57 | 12 | 8  | 8  | Co Occurence | ARID1B, FLNA   | 12/16 |
| FANCA  | BIRC6  | 5.27922E-05 | 11.097709   | 59 | 11 | 8  | 7  | Co Occurence | BIRC6, FANCA   | 11/15 |
| MTOR   | TSC2   | 5.27922E-05 | 11.097709   | 59 | 11 | 8  | 7  | Co Occurence | MTOR, TSC2     | 11/15 |
| KAT6A  | FANCA  | 5.95923E-05 | 12.12390441 | 61 | 10 | 8  | 6  | Co Occurence | FANCA, KAT6A   | 10/14 |
| NIN    | FANCA  | 5.95923E-05 | 12.12390441 | 61 | 10 | 8  | 6  | Co Occurence | FANCA, NIN     | 10/14 |
| SETD1B | FANCA  | 5.95923E-05 | 12.12390441 | 61 | 10 | 8  | 6  | Co Occurence | FANCA, SETD1B  | 10/14 |
| POLD1  | MYH9   | 6.34864E-05 | 11.88059761 | 61 | 10 | 7  | 7  | Co Occurence | MYH9, POLD1    | 10/14 |
| SPEN   | POLD1  | 6.34864E-05 | 11.88059761 | 61 | 10 | 7  | 7  | Co Occurence | POLD1, SPEN    | 10/14 |
| STAG1  | NIN    | 8.1474E-05  | 12.83423379 | 63 | 9  | 7  | 6  | Co Occurence | NIN, STAG1     | 9/13  |
| NCOR1  | SETD1B | 8.1474E-05  | 12.83423379 | 63 | 9  | 7  | 6  | Co Occurence | NCOR1, SETD1B  | 9/13  |
| STAG1  | SETD1B | 8.1474E-05  | 12.83423379 | 63 | 9  | 7  | 6  | Co Occurence | SETD1B, STAG1  | 9/13  |
| BCORL1 | RANBP2 | 9.14925E-05 | 11.48136225 | 60 | 10 | 5  | 10 | Co Occurence | BCORL1, RANBP2 | 10/15 |
| BCORL1 | ZMYM3  | 9.14925E-05 | 11.48136225 | 60 | 10 | 5  | 10 | Co Occurence | BCORL1, ZMYM3  | 10/15 |
| FLNA   | ZMYM3  | 9.14925E-05 | 11.48136225 | 60 | 10 | 5  | 10 | Co Occurence | FLNA, ZMYM3    | 10/15 |
| TSC2   | CREBBP | 9.25921E-05 | 9.251424428 | 56 | 12 | 10 | 7  | Co Occurence | CREBBP, TSC2   | 12/17 |
| TSC2   | POLE   | 9.25921E-05 | 9.251424428 | 56 | 12 | 10 | 7  | Co Occurence | POLE, TSC2     | 12/17 |
| DNMT1  | DCC    | 9.60631E-05 | 13.28883341 | 62 | 9  | 4  | 10 | Co Occurence | DCC, DNMT1     | 9/14  |
| MTOR   | BCORL1 | 0.000106099 | 9.733448195 | 58 | 11 | 9  | 7  | Co Occurence | BCORL1, MTOR   | 11/16 |
| MTOR   | FLNA   | 0.000106099 | 9.733448195 | 58 | 11 | 9  | 7  | Co Occurence | FLNA, MTOR     | 11/16 |
| FANCA  | NCOR2  | 0.000106099 | 9.733448195 | 58 | 11 | 9  | 7  | Co Occurence | FANCA, NCOR2   | 11/16 |
| NSD1   | POLE   | 0.00010909  | 11.78126481 | 59 | 10 | 12 | 4  | Co Occurence | NSD1, POLE     | 10/16 |
| TPR    | DCC    | 0.000111857 | 14.05904627 | 65 | 8  | 5  | 7  | Co Occurence | DCC, TPR       | 8/12  |
| DNMT1  | AXIN1  | 0.000111867 | 9.582079494 | 58 | 11 | 8  | 8  | Co Occurence | AXIN1, DNMT1   | 11/16 |
| AXIN1  | TERT   | 0.000115737 | 10.64611137 | 60 | 10 | 6  | 9  | Co Occurence | AXIN1, TERT    | 10/15 |
| NF1    | SETD1B | 0.000121354 | 10.05590879 | 57 | 11 | 5  | 12 | Co Occurence | NF1, SETD1B    | 11/17 |
| NF1    | TERT   | 0.000121354 | 10.05590879 | 57 | 11 | 5  | 12 | Co Occurence | NF1, TERT      | 11/17 |
| FANCA  | MYH9   | 0.000129685 | 10.27412886 | 60 | 10 | 7  | 8  | Co Occurence | FANCA, MYH9    | 10/15 |
| FANCA  | RNF213 | 0.00014403  | 8.724060532 | 52 | 13 | 15 | 5  | Co Occurence | FANCA, RNF213  | 13/20 |
| MTOR   | RNF213 | 0.00014403  | 8.724060532 | 52 | 13 | 15 | 5  | Co Occurence | MTOR, RNF213   | 13/20 |
| NCOR1  | MYH9   | 0.000159801 | 11.10788772 | 62 | 9  | 8  | 6  | Co Occurence | MYH9, NCOR1    | 9/14  |
| STAG1  | SPEN   | 0.000159801 | 11.10788772 | 62 | 9  | 8  | 6  | Co Occurence | SPEN, STAG1    | 9/14  |
| TPR    | SPEN   | 0.000159801 | 11.10788772 | 62 | 9  | 8  | 6  | Co Occurence | SPEN, TPR      | 9/14  |
| NCOR1  | TNC    | 0.000159801 | 11.10788772 | 62 | 9  | 8  | 6  | Co Occurence | NCOR1, TNC     | 9/14  |

|        |         |             |             |    |    |    |    |              |                 |       |
|--------|---------|-------------|-------------|----|----|----|----|--------------|-----------------|-------|
| TNC    | CREBBP  | 0.000165287 | 9.15377904  | 57 | 11 | 11 | 6  | Co Occurence | CREBBP, TNC     | 11/17 |
| DCC    | FLNA    | 0.000165327 | 11.93318566 | 61 | 9  | 11 | 4  | Co Occurence | DCC, FLNA       | 9/15  |
| TERT   | RNF213  | 0.000167492 | 9.609333365 | 53 | 12 | 16 | 4  | Co Occurence | RNF213, TERT    | 12/20 |
| TERT   | KAT6A   | 0.000169711 | 10.8851157  | 62 | 9  | 7  | 7  | Co Occurence | KAT6A, TERT     | 9/14  |
| TERT   | NIN     | 0.000169711 | 10.8851157  | 62 | 9  | 7  | 7  | Co Occurence | NIN, TERT       | 9/14  |
| TRRAP  | NIN     | 0.000169711 | 10.8851157  | 62 | 9  | 7  | 7  | Co Occurence | NIN, TRRAP      | 9/14  |
| RNF213 | NSD1    | 0.000178722 | 11.24053595 | 54 | 11 | 3  | 17 | Co Occurence | NSD1, RNF213    | 11/20 |
| BRCA2  | NF1     | 0.000182121 | 10.72112637 | 58 | 10 | 13 | 4  | Co Occurence | BRCA2, NF1      | 10/17 |
| FLNA   | POLE    | 0.000199622 | 7.977317992 | 55 | 12 | 10 | 8  | Co Occurence | FLNA, POLE      | 12/18 |
| UBR5   | POLE    | 0.000199622 | 7.977317992 | 55 | 12 | 10 | 8  | Co Occurence | POLE, UBR5      | 12/18 |
| RNF213 | BCORL1  | 0.000201966 | 8.232339903 | 51 | 14 | 6  | 14 | Co Occurence | BCORL1, RNF213  | 14/20 |
| RNF213 | NCOR2   | 0.000201966 | 8.232339903 | 51 | 14 | 6  | 14 | Co Occurence | NCOR2, RNF213   | 14/20 |
| CREBBP | SMARCA4 | 0.000207484 | 7.417330224 | 53 | 13 | 10 | 9  | Co Occurence | CREBBP, SMARCA4 | 13/19 |
| POLE   | SMARCA4 | 0.000207484 | 7.417330224 | 53 | 13 | 10 | 9  | Co Occurence | POLE, SMARCA4   | 13/19 |
| DCC    | NIN     | 0.000209745 | 12.18136185 | 64 | 8  | 8  | 5  | Co Occurence | DCC, NIN        | 8/13  |
| DCC    | TERT    | 0.000209745 | 12.18136185 | 64 | 8  | 8  | 5  | Co Occurence | DCC, TERT       | 8/13  |
| COL3A1 | TRRAP   | 0.000209745 | 12.18136185 | 64 | 8  | 8  | 5  | Co Occurence | COL3A1, TRRAP   | 8/13  |
| FLNA   | SETD1B  | 0.000212713 | 9.459132383 | 59 | 10 | 6  | 10 | Co Occurence | FLNA, SETD1B    | 10/16 |
| NCOR2  | SETD1B  | 0.000212713 | 9.459132383 | 59 | 10 | 6  | 10 | Co Occurence | NCOR2, SETD1B   | 10/16 |
| ARID1B | TERT    | 0.000212713 | 9.459132383 | 59 | 10 | 6  | 10 | Co Occurence | ARID1B, TERT    | 10/16 |
| FLNA   | TERT    | 0.000212713 | 9.459132383 | 59 | 10 | 6  | 10 | Co Occurence | FLNA, TERT      | 10/16 |
| NCOR2  | TERT    | 0.000212713 | 9.459132383 | 59 | 10 | 6  | 10 | Co Occurence | NCOR2, TERT     | 10/16 |
| UBR5   | TRRAP   | 0.000212713 | 9.459132383 | 59 | 10 | 6  | 10 | Co Occurence | TRRAP, UBR5     | 10/16 |
| TSC2   | FLNA    | 0.000221465 | 8.402572927 | 57 | 11 | 9  | 8  | Co Occurence | FLNA, TSC2      | 11/17 |
| AXIN1  | NCOR2   | 0.000221465 | 8.402572927 | 57 | 11 | 9  | 8  | Co Occurence | AXIN1, NCOR2    | 11/17 |
| DNMT1  | NCOR2   | 0.000221465 | 8.402572927 | 57 | 11 | 9  | 8  | Co Occurence | DNMT1, NCOR2    | 11/17 |
| DNMT1  | NSD1    | 0.000235745 | 10.52024293 | 61 | 9  | 5  | 10 | Co Occurence | DNMT1, NSD1     | 9/15  |
| TSC2   | NSD1    | 0.000235745 | 10.52024293 | 61 | 9  | 5  | 10 | Co Occurence | NSD1, TSC2      | 9/15  |
| KAT6B  | AXIN1   | 0.000248251 | 9.012980062 | 59 | 10 | 9  | 7  | Co Occurence | AXIN1, KAT6B    | 10/16 |
| MYH9   | BIRC6   | 0.000248251 | 9.012980062 | 59 | 10 | 9  | 7  | Co Occurence | BIRC6, MYH9     | 10/16 |
| MYH9   | DNMT1   | 0.000248251 | 9.012980062 | 59 | 10 | 9  | 7  | Co Occurence | DNMT1, MYH9     | 10/16 |
| POLD1  | DNMT1   | 0.000248251 | 9.012980062 | 59 | 10 | 9  | 7  | Co Occurence | DNMT1, POLD1    | 10/16 |
| KAT6B  | TSC2    | 0.000248251 | 9.012980062 | 59 | 10 | 9  | 7  | Co Occurence | KAT6B, TSC2     | 10/16 |
| NCOR1  | CREBBP  | 0.000277575 | 9.312845443 | 58 | 10 | 12 | 5  | Co Occurence | CREBBP, NCOR1   | 10/17 |
| STAG1  | POLE    | 0.000277575 | 9.312845443 | 58 | 10 | 12 | 5  | Co Occurence | POLE, STAG1     | 10/17 |
| FAT1   | TNC     | 0.000278101 | 8.214253008 | 53 | 12 | 5  | 15 | Co Occurence | FAT1, TNC       | 12/20 |
| DROSHA | MYH9    | 0.000289763 | 8.267862188 | 56 | 11 | 6  | 12 | Co Occurence | DROSHA, MYH9    | 11/18 |
| NF1    | TNC     | 0.000289763 | 8.267862188 | 56 | 11 | 6  | 12 | Co Occurence | NF1, TNC        | 11/18 |
| FANCA  | NCOR1   | 0.000294696 | 9.754872385 | 61 | 9  | 6  | 9  | Co Occurence | FANCA, NCOR1    | 9/15  |

|        |        |             |             |    |    |    |    |              |                |       |
|--------|--------|-------------|-------------|----|----|----|----|--------------|----------------|-------|
| FANCA  | RANBP2 | 0.000294696 | 9.754872385 | 61 | 9  | 6  | 9  | Co Occurence | FANCA, RANBP2  | 9/15  |
| KAT6B  | KAT6A  | 0.000328283 | 9.416101913 | 61 | 9  | 7  | 8  | Co Occurence | KAT6A, KAT6B   | 9/15  |
| SPEN   | NIN    | 0.000328283 | 9.416101913 | 61 | 9  | 7  | 8  | Co Occurence | NIN, SPEN      | 9/15  |
| KAT6B  | SETD1B | 0.000328283 | 9.416101913 | 61 | 9  | 7  | 8  | Co Occurence | KAT6B, SETD1B  | 9/15  |
| KAT6B  | TERT   | 0.000328283 | 9.416101913 | 61 | 9  | 7  | 8  | Co Occurence | KAT6B, TERT    | 9/15  |
| POLD1  | TERT   | 0.000328283 | 9.416101913 | 61 | 9  | 7  | 8  | Co Occurence | POLD1, TERT    | 9/15  |
| NCOR1  | FAT1   | 0.00033931  | 8.981960404 | 54 | 11 | 16 | 4  | Co Occurence | FAT1, NCOR1    | 11/20 |
| STAG1  | FAT1   | 0.00033931  | 8.981960404 | 54 | 11 | 16 | 4  | Co Occurence | FAT1, STAG1    | 11/20 |
| BCORL1 | DROSHA | 0.000369511 | 7.138925776 | 54 | 12 | 11 | 8  | Co Occurence | BCORL1, DROSHA | 12/19 |
| FLNA   | DROSHA | 0.000369511 | 7.138925776 | 54 | 12 | 11 | 8  | Co Occurence | DROSHA, FLNA   | 12/19 |
| KAT6B  | DCC    | 0.000371158 | 10.70931515 | 63 | 8  | 5  | 9  | Co Occurence | DCC, KAT6B     | 8/14  |
| SPEN   | DCC    | 0.000371158 | 10.70931515 | 63 | 8  | 5  | 9  | Co Occurence | DCC, SPEN      | 8/14  |
| SPEN   | RET    | 0.000371158 | 10.70931515 | 63 | 8  | 5  | 9  | Co Occurence | RET, SPEN      | 8/14  |
| BRCA2  | BCORL1 | 0.000400054 | 9.441990575 | 60 | 9  | 11 | 5  | Co Occurence | BCORL1, BRCA2  | 9/16  |
| BRCA2  | FLNA   | 0.000400054 | 9.441990575 | 60 | 9  | 11 | 5  | Co Occurence | BRCA2, FLNA    | 9/16  |
| COL1A1 | NIN    | 0.000441776 | 10.05329539 | 63 | 8  | 8  | 6  | Co Occurence | COL1A1, NIN    | 8/14  |
| NSD1   | SETD1B | 0.000441776 | 10.05329539 | 63 | 8  | 8  | 6  | Co Occurence | NSD1, SETD1B   | 8/14  |
| BRCA2  | TRRAP  | 0.000441776 | 10.05329539 | 63 | 8  | 8  | 6  | Co Occurence | BRCA2, TRRAP   | 8/14  |
| NSD1   | TRRAP  | 0.000441776 | 10.05329539 | 63 | 8  | 8  | 6  | Co Occurence | NSD1, TRRAP    | 8/14  |
| EGFR   | BCORL1 | 0.000449633 | 8.001574042 | 58 | 10 | 10 | 7  | Co Occurence | BCORL1, EGFR   | 10/17 |
| TPR    | DROSHA | 0.000456552 | 8.471687242 | 57 | 10 | 13 | 5  | Co Occurence | DROSHA, TPR    | 10/18 |
| NCOR1  | NF1    | 0.000456552 | 8.471687242 | 57 | 10 | 13 | 5  | Co Occurence | NCOR1, NF1     | 10/18 |
| AXIN1  | MTOR   | 0.000492575 | 7.782571738 | 58 | 10 | 8  | 9  | Co Occurence | AXIN1, MTOR    | 10/17 |
| RNF213 | BIRC6  | 0.00051227  | 7.155489209 | 51 | 13 | 6  | 15 | Co Occurence | BIRC6, RNF213  | 13/21 |
| AXIN1  | NCOR1  | 0.000515765 | 8.667948309 | 60 | 9  | 6  | 10 | Co Occurence | AXIN1, NCOR1   | 9/16  |
| DNMT1  | NCOR1  | 0.000515765 | 8.667948309 | 60 | 9  | 6  | 10 | Co Occurence | DNMT1, NCOR1   | 9/16  |
| AXIN1  | ZMYM3  | 0.000515765 | 8.667948309 | 60 | 9  | 6  | 10 | Co Occurence | AXIN1, ZMYM3   | 9/16  |
| DNMT1  | ZMYM3  | 0.000515765 | 8.667948309 | 60 | 9  | 6  | 10 | Co Occurence | DNMT1, ZMYM3   | 9/16  |
| TSC2   | ZMYM3  | 0.000515765 | 8.667948309 | 60 | 9  | 6  | 10 | Co Occurence | TSC2, ZMYM3    | 9/16  |
| RANBP2 | RNF213 | 0.000524604 | 8.312296105 | 53 | 11 | 17 | 4  | Co Occurence | RANBP2, RNF213 | 11/21 |
| COL3A1 | RNF213 | 0.000568526 | 9.678756288 | 54 | 10 | 18 | 3  | Co Occurence | COL3A1, RNF213 | 10/21 |
| DCC    | RNF213 | 0.000568526 | 9.678756288 | 54 | 10 | 18 | 3  | Co Occurence | DCC, RNF213    | 10/21 |
| MTOR   | KAT6A  | 0.000596973 | 8.261736046 | 60 | 9  | 7  | 9  | Co Occurence | KAT6A, MTOR    | 9/16  |
| FANCA  | TERT   | 0.000596973 | 8.261736046 | 60 | 9  | 7  | 9  | Co Occurence | FANCA, TERT    | 9/16  |
| MTOR   | TERT   | 0.000596973 | 8.261736046 | 60 | 9  | 7  | 9  | Co Occurence | MTOR, TERT     | 9/16  |
| ARID1B | FAT1   | 0.000625069 | 6.578711811 | 51 | 13 | 14 | 7  | Co Occurence | ARID1B, FAT1   | 13/21 |
| TNC    | EGFR   | 0.000626179 | 8.134263258 | 60 | 9  | 8  | 8  | Co Occurence | EGFR, TNC      | 9/16  |
| MYH9   | KAT6B  | 0.000626179 | 8.134263258 | 60 | 9  | 8  | 8  | Co Occurence | KAT6B, MYH9    | 9/16  |
| TRRAP  | CREBBP | 0.00062658  | 7.658466857 | 57 | 10 | 12 | 6  | Co Occurence | CREBBP, TRRAP  | 10/18 |

|        |        |             |             |    |    |    |    |              |                |       |
|--------|--------|-------------|-------------|----|----|----|----|--------------|----------------|-------|
| SETD1B | POLE   | 0.00062658  | 7.658466857 | 57 | 10 | 12 | 6  | Co Occurence | POLE, SETD1B   | 10/18 |
| TRRAP  | POLE   | 0.00062658  | 7.658466857 | 57 | 10 | 12 | 6  | Co Occurence | POLE, TRRAP    | 10/18 |
| DROSHA | FANCA  | 0.00062658  | 6.985426174 | 55 | 11 | 7  | 12 | Co Occurence | DROSHA, FANCA  | 11/19 |
| NF1    | FANCA  | 0.00062658  | 6.985426174 | 55 | 11 | 7  | 12 | Co Occurence | FANCA, NF1     | 11/19 |
| COL3A1 | NF1    | 0.000679177 | 8.997196166 | 58 | 9  | 14 | 4  | Co Occurence | COL3A1, NF1    | 9/18  |
| RET    | BRCA2  | 0.000720939 | 10.34331037 | 65 | 7  | 7  | 6  | Co Occurence | BRCA2, RET     | 7/13  |
| COL3A1 | N4BP2  | 0.000720939 | 10.34331037 | 65 | 7  | 7  | 6  | Co Occurence | COL3A1, N4BP2  | 7/13  |
| DCC    | NSD1   | 0.000720939 | 10.34331037 | 65 | 7  | 7  | 6  | Co Occurence | DCC, NSD1      | 7/13  |
| NSD1   | EGFR   | 0.000771328 | 8.829463622 | 62 | 8  | 9  | 6  | Co Occurence | EGFR, NSD1     | 8/15  |
| BRCA2  | KAT6B  | 0.000771328 | 8.829463622 | 62 | 8  | 9  | 6  | Co Occurence | BRCA2, KAT6B   | 8/15  |
| COL1A1 | KAT6B  | 0.000771328 | 8.829463622 | 62 | 8  | 9  | 6  | Co Occurence | COL1A1, KAT6B  | 8/15  |
| NSD1   | MYH9   | 0.000771328 | 8.829463622 | 62 | 8  | 9  | 6  | Co Occurence | MYH9, NSD1     | 8/15  |
| BRCA2  | SPEN   | 0.000771328 | 8.829463622 | 62 | 8  | 9  | 6  | Co Occurence | BRCA2, SPEN    | 8/15  |
| ZMYM3  | SETD1B | 0.000853551 | 8.518799385 | 62 | 8  | 8  | 7  | Co Occurence | SETD1B, ZMYM3  | 8/15  |
| NCOR1  | TERT   | 0.000853551 | 8.518799385 | 62 | 8  | 8  | 7  | Co Occurence | NCOR1, TERT    | 8/15  |
| NCOR1  | TRRAP  | 0.000853551 | 8.518799385 | 62 | 8  | 8  | 7  | Co Occurence | NCOR1, TRRAP   | 8/15  |
| RANBP2 | TRRAP  | 0.000853551 | 8.518799385 | 62 | 8  | 8  | 7  | Co Occurence | RANBP2, TRRAP  | 8/15  |
| FAT1   | NIN    | 0.000861309 | 7.08057467  | 53 | 11 | 5  | 16 | Co Occurence | FAT1, NIN      | 11/21 |
| FAT1   | SETD1B | 0.000861309 | 7.08057467  | 53 | 11 | 5  | 16 | Co Occurence | FAT1, SETD1B   | 11/21 |
| FAT1   | TRRAP  | 0.000861309 | 7.08057467  | 53 | 11 | 5  | 16 | Co Occurence | FAT1, TRRAP    | 11/21 |
| NCOR2  | NCOR1  | 0.000862896 | 7.773088101 | 59 | 9  | 6  | 11 | Co Occurence | NCOR1, NCOR2   | 9/17  |
| ARID1B | RANBP2 | 0.000862896 | 7.773088101 | 59 | 9  | 6  | 11 | Co Occurence | ARID1B, RANBP2 | 9/17  |
| FLNA   | STAG1  | 0.000862896 | 7.773088101 | 59 | 9  | 6  | 11 | Co Occurence | FLNA, STAG1    | 9/17  |
| BCORL1 | TPR    | 0.000862896 | 7.773088101 | 59 | 9  | 6  | 11 | Co Occurence | BCORL1, TPR    | 9/17  |
| FANCA  | ARID1B | 0.00087905  | 6.904752815 | 57 | 10 | 10 | 8  | Co Occurence | ARID1B, FANCA  | 10/18 |
| FANCA  | FLNA   | 0.00087905  | 6.904752815 | 57 | 10 | 10 | 8  | Co Occurence | FANCA, FLNA    | 10/18 |
| BIRC6  | AXIN1  | 0.000915582 | 6.819816132 | 57 | 10 | 9  | 9  | Co Occurence | AXIN1, BIRC6   | 10/18 |
| TSC2   | AXIN1  | 0.000915582 | 6.819816132 | 57 | 10 | 9  | 9  | Co Occurence | AXIN1, TSC2    | 10/18 |
| FAT1   | RNF213 | 0.000979451 | 5.443220712 | 46 | 16 | 12 | 11 | Co Occurence | FAT1, RNF213   | 16/23 |
| BIRC6  | DCC    | 0.001010345 | 8.54686191  | 61 | 8  | 5  | 11 | Co Occurence | BIRC6, DCC     | 8/16  |
| TSC2   | DCC    | 0.001010345 | 8.54686191  | 61 | 8  | 5  | 11 | Co Occurence | DCC, TSC2      | 8/16  |
| BIRC6  | RET    | 0.001010345 | 8.54686191  | 61 | 8  | 5  | 11 | Co Occurence | BIRC6, RET     | 8/16  |
| NF1    | NIN    | 0.001015215 | 6.963645767 | 56 | 10 | 6  | 13 | Co Occurence | NF1, NIN       | 10/19 |
| COL1A1 | CREBBP | 0.001029277 | 7.768405594 | 58 | 9  | 13 | 5  | Co Occurence | COL1A1, CREBBP | 9/18  |
| NSD1   | CREBBP | 0.001029277 | 7.768405594 | 58 | 9  | 13 | 5  | Co Occurence | CREBBP, NSD1   | 9/18  |
| BRCA2  | POLE   | 0.001029277 | 7.768405594 | 58 | 9  | 13 | 5  | Co Occurence | BRCA2, POLE    | 9/18  |
| SETD1B | AXIN1  | 0.001030086 | 7.335343046 | 59 | 9  | 10 | 7  | Co Occurence | AXIN1, SETD1B  | 9/17  |
| TERT   | DNMT1  | 0.001030086 | 7.335343046 | 59 | 9  | 10 | 7  | Co Occurence | DNMT1, TERT    | 9/17  |
| NIN    | TSC2   | 0.001030086 | 7.335343046 | 59 | 9  | 10 | 7  | Co Occurence | NIN, TSC2      | 9/17  |

|        |         |             |             |    |    |    |    |              |                 |       |
|--------|---------|-------------|-------------|----|----|----|----|--------------|-----------------|-------|
| TERT   | TSC2    | 0.001030086 | 7.335343046 | 59 | 9  | 10 | 7  | Co Occurence | TERT, TSC2      | 9/17  |
| MTOR   | FAT1    | 0.001039875 | 6.739937886 | 52 | 12 | 15 | 6  | Co Occurence | FAT1, MTOR      | 12/21 |
| FAT1   | COL1A1  | 0.00105578  | 7.706466835 | 54 | 10 | 4  | 17 | Co Occurence | COL1A1, FAT1    | 10/21 |
| SPEN   | FANCA   | 0.001122672 | 7.135715775 | 59 | 9  | 9  | 8  | Co Occurence | FANCA, SPEN     | 9/17  |
| TNC    | FANCA   | 0.001122672 | 7.135715775 | 59 | 9  | 9  | 8  | Co Occurence | FANCA, TNC      | 9/17  |
| MYH9   | MTOR    | 0.001122672 | 7.135715775 | 59 | 9  | 9  | 8  | Co Occurence | MTOR, MYH9      | 9/17  |
| NF1    | FAT1    | 0.001189223 | 5.716574532 | 49 | 14 | 13 | 9  | Co Occurence | FAT1, NF1       | 14/22 |
| DCC    | NCOR1   | 0.001253887 | 8.952637268 | 64 | 7  | 8  | 6  | Co Occurence | DCC, NCOR1      | 7/14  |
| DCC    | RANBP2  | 0.001253887 | 8.952637268 | 64 | 7  | 8  | 6  | Co Occurence | DCC, RANBP2     | 7/14  |
| RET    | TPR     | 0.001253887 | 8.952637268 | 64 | 7  | 8  | 6  | Co Occurence | RET, TPR        | 7/14  |
| BRCA2  | FANCA   | 0.001282134 | 7.847655356 | 61 | 8  | 10 | 6  | Co Occurence | BRCA2, FANCA    | 8/16  |
| N4BP2  | FANCA   | 0.001282134 | 7.847655356 | 61 | 8  | 10 | 6  | Co Occurence | FANCA, N4BP2    | 8/16  |
| CREBBP | KAT6B   | 0.00128557  | 6.473361949 | 56 | 10 | 7  | 12 | Co Occurence | CREBBP, KAT6B   | 10/19 |
| POLE   | KAT6B   | 0.00128557  | 6.473361949 | 56 | 10 | 7  | 12 | Co Occurence | KAT6B, POLE     | 10/19 |
| RANBP2 | EGFR    | 0.001470217 | 7.479465473 | 61 | 8  | 9  | 7  | Co Occurence | EGFR, RANBP2    | 8/16  |
| ZMYM3  | KAT6B   | 0.001470217 | 7.479465473 | 61 | 8  | 9  | 7  | Co Occurence | KAT6B, ZMYM3    | 8/16  |
| NCOR1  | POLD1   | 0.001470217 | 7.479465473 | 61 | 8  | 9  | 7  | Co Occurence | NCOR1, POLD1    | 8/16  |
| STAG1  | POLD1   | 0.001470217 | 7.479465473 | 61 | 8  | 9  | 7  | Co Occurence | POLD1, STAG1    | 8/16  |
| NCOR1  | SPEN    | 0.001470217 | 7.479465473 | 61 | 8  | 9  | 7  | Co Occurence | NCOR1, SPEN     | 8/16  |
| NIN    | KAT6A   | 0.00153739  | 7.364429079 | 61 | 8  | 8  | 8  | Co Occurence | KAT6A, NIN      | 8/16  |
| SETD1B | KAT6A   | 0.00153739  | 7.364429079 | 61 | 8  | 8  | 8  | Co Occurence | KAT6A, SETD1B   | 8/16  |
| SETD1B | NIN     | 0.00153739  | 7.364429079 | 61 | 8  | 8  | 8  | Co Occurence | NIN, SETD1B     | 8/16  |
| TERT   | SETD1B  | 0.00153739  | 7.364429079 | 61 | 8  | 8  | 8  | Co Occurence | SETD1B, TERT    | 8/16  |
| TRRAP  | SETD1B  | 0.00153739  | 7.364429079 | 61 | 8  | 8  | 8  | Co Occurence | SETD1B, TRRAP   | 8/16  |
| RNF213 | DROSHA  | 0.001544091 | 5.209623086 | 48 | 14 | 9  | 14 | Co Occurence | DROSHA, RNF213  | 14/23 |
| COL3A1 | BCORL1  | 0.00157369  | 7.729269372 | 60 | 8  | 12 | 5  | Co Occurence | BCORL1, COL3A1  | 8/17  |
| DCC    | BCORL1  | 0.00157369  | 7.729269372 | 60 | 8  | 12 | 5  | Co Occurence | BCORL1, DCC     | 8/17  |
| RET    | BCORL1  | 0.00157369  | 7.729269372 | 60 | 8  | 12 | 5  | Co Occurence | BCORL1, RET     | 8/17  |
| COL3A1 | FLNA    | 0.00157369  | 7.729269372 | 60 | 8  | 12 | 5  | Co Occurence | COL3A1, FLNA    | 8/17  |
| DCC    | NCOR2   | 0.00157369  | 7.729269372 | 60 | 8  | 12 | 5  | Co Occurence | DCC, NCOR2      | 8/17  |
| NSD1   | DROSHA  | 0.001573878 | 7.10565818  | 57 | 9  | 14 | 5  | Co Occurence | DROSHA, NSD1    | 9/19  |
| COL1A1 | SMARCA4 | 0.001573878 | 7.10565818  | 57 | 9  | 14 | 5  | Co Occurence | COL1A1, SMARCA4 | 9/19  |
| BCORL1 | AXIN1   | 0.0016097   | 6.048152657 | 56 | 10 | 9  | 10 | Co Occurence | AXIN1, BCORL1   | 10/19 |
| FLNA   | BIRC6   | 0.0016097   | 6.048152657 | 56 | 10 | 9  | 10 | Co Occurence | BIRC6, FLNA     | 10/19 |
| NCOR2  | BIRC6   | 0.0016097   | 6.048152657 | 56 | 10 | 9  | 10 | Co Occurence | BIRC6, NCOR2    | 10/19 |
| BCORL1 | DNMT1   | 0.0016097   | 6.048152657 | 56 | 10 | 9  | 10 | Co Occurence | BCORL1, DNMT1   | 10/19 |
| UBR5   | TSC2    | 0.0016097   | 6.048152657 | 56 | 10 | 9  | 10 | Co Occurence | TSC2, UBR5      | 10/19 |
| CREBBP | DROSHA  | 0.001628903 | 5.529729445 | 52 | 12 | 11 | 10 | Co Occurence | CREBBP, DROSHA  | 12/21 |
| POLE   | NF1     | 0.001628903 | 5.529729445 | 52 | 12 | 11 | 10 | Co Occurence | NF1, POLE       | 12/21 |

|        |         |             |             |    |    |    |    |              |                |       |
|--------|---------|-------------|-------------|----|----|----|----|--------------|----------------|-------|
| TRRAP  | ARID1B  | 0.001698846 | 6.574934412 | 58 | 9  | 11 | 7  | Co Occurence | ARID1B, TRRAP  | 9/18  |
| NIN    | BCORL1  | 0.001698846 | 6.574934412 | 58 | 9  | 11 | 7  | Co Occurence | BCORL1, NIN    | 9/18  |
| SETD1B | BCORL1  | 0.001698846 | 6.574934412 | 58 | 9  | 11 | 7  | Co Occurence | BCORL1, SETD1B | 9/18  |
| TRRAP  | FLNA    | 0.001698846 | 6.574934412 | 58 | 9  | 11 | 7  | Co Occurence | FLNA, TRRAP    | 9/18  |
| SETD1B | UBR5    | 0.001698846 | 6.574934412 | 58 | 9  | 11 | 7  | Co Occurence | SETD1B, UBR5   | 9/18  |
| POLD1  | BIRC6   | 0.001909651 | 6.332874487 | 58 | 9  | 10 | 8  | Co Occurence | BIRC6, POLD1   | 9/18  |
| SPEN   | BIRC6   | 0.001909651 | 6.332874487 | 58 | 9  | 10 | 8  | Co Occurence | BIRC6, SPEN    | 9/18  |
| EGFR   | DNMT1   | 0.001909651 | 6.332874487 | 58 | 9  | 10 | 8  | Co Occurence | DNMT1, EGFR    | 9/18  |
| MYH9   | TSC2    | 0.001909651 | 6.332874487 | 58 | 9  | 10 | 8  | Co Occurence | MYH9, TSC2     | 9/18  |
| NSD1   | BIRC6   | 0.002043144 | 7.03738011  | 60 | 8  | 11 | 6  | Co Occurence | BIRC6, NSD1    | 8/17  |
| COL1A1 | DNMT1   | 0.002043144 | 7.03738011  | 60 | 8  | 11 | 6  | Co Occurence | COL1A1, DNMT1  | 8/17  |
| COL1A1 | TSC2    | 0.002043144 | 7.03738011  | 60 | 8  | 11 | 6  | Co Occurence | COL1A1, TSC2   | 8/17  |
| RNF213 | SETD1B  | 0.00204615  | 6.549455358 | 52 | 11 | 5  | 17 | Co Occurence | RNF213, SETD1B | 11/22 |
| RNF213 | TRRAP   | 0.00204615  | 6.549455358 | 52 | 11 | 5  | 17 | Co Occurence | RNF213, TRRAP  | 11/22 |
| KAT6B  | DROSHA  | 0.002051575 | 5.882126452 | 55 | 10 | 13 | 7  | Co Occurence | DROSHA, KAT6B  | 10/20 |
| POLD1  | DROSHA  | 0.002051575 | 5.882126452 | 55 | 10 | 13 | 7  | Co Occurence | DROSHA, POLD1  | 10/20 |
| KAT6B  | NF1     | 0.002051575 | 5.882126452 | 55 | 10 | 13 | 7  | Co Occurence | KAT6B, NF1     | 10/20 |
| MYH9   | NF1     | 0.002051575 | 5.882126452 | 55 | 10 | 13 | 7  | Co Occurence | MYH9, NF1      | 10/20 |
| MYH9   | SMARCA4 | 0.002051575 | 5.882126452 | 55 | 10 | 13 | 7  | Co Occurence | MYH9, SMARCA4  | 10/20 |
| DCC    | KAT6A   | 0.002065997 | 7.867657737 | 63 | 7  | 9  | 6  | Co Occurence | DCC, KAT6A     | 7/15  |
| DCC    | TRRAP   | 0.002065997 | 7.867657737 | 63 | 7  | 9  | 6  | Co Occurence | DCC, TRRAP     | 7/15  |
| RET    | TRRAP   | 0.002065997 | 7.867657737 | 63 | 7  | 9  | 6  | Co Occurence | RET, TRRAP     | 7/15  |
| POLE   | TPR     | 0.002156831 | 6.387619516 | 57 | 9  | 6  | 13 | Co Occurence | POLE, TPR      | 9/19  |
| CREBBP | ZMYM3   | 0.002156831 | 6.387619516 | 57 | 9  | 6  | 13 | Co Occurence | CREBBP, ZMYM3  | 9/19  |
| NF1    | DNMT1   | 0.002255203 | 6.019682935 | 54 | 11 | 8  | 12 | Co Occurence | DNMT1, NF1     | 11/20 |
| DROSHA | TSC2    | 0.002255203 | 6.019682935 | 54 | 11 | 8  | 12 | Co Occurence | DROSHA, TSC2   | 11/20 |
| NF1    | TSC2    | 0.002255203 | 6.019682935 | 54 | 11 | 8  | 12 | Co Occurence | NF1, TSC2      | 11/20 |
| BRCA2  | NCOR1   | 0.002269024 | 7.591493023 | 63 | 7  | 8  | 7  | Co Occurence | BRCA2, NCOR1   | 7/15  |
| NSD1   | NCOR1   | 0.002269024 | 7.591493023 | 63 | 7  | 8  | 7  | Co Occurence | NCOR1, NSD1    | 7/15  |
| NSD1   | RANBP2  | 0.002269024 | 7.591493023 | 63 | 7  | 8  | 7  | Co Occurence | NSD1, RANBP2   | 7/15  |
| COL1A1 | STAG1   | 0.002269024 | 7.591493023 | 63 | 7  | 8  | 7  | Co Occurence | COL1A1, STAG1  | 7/15  |
| N4BP2  | STAG1   | 0.002269024 | 7.591493023 | 63 | 7  | 8  | 7  | Co Occurence | N4BP2, STAG1   | 7/15  |
| NSD1   | STAG1   | 0.002269024 | 7.591493023 | 63 | 7  | 8  | 7  | Co Occurence | NSD1, STAG1    | 7/15  |
| BRCA2  | TPR     | 0.002269024 | 7.591493023 | 63 | 7  | 8  | 7  | Co Occurence | BRCA2, TPR     | 7/15  |
| BRCA2  | ZMYM3   | 0.002269024 | 7.591493023 | 63 | 7  | 8  | 7  | Co Occurence | BRCA2, ZMYM3   | 7/15  |
| COL1A1 | ZMYM3   | 0.002269024 | 7.591493023 | 63 | 7  | 8  | 7  | Co Occurence | COL1A1, ZMYM3  | 7/15  |
| BCORL1 | CREBBP  | 0.00234961  | 5.839898441 | 54 | 11 | 11 | 9  | Co Occurence | BCORL1, CREBBP | 11/20 |
| UBR5   | CREBBP  | 0.00234961  | 5.839898441 | 54 | 11 | 11 | 9  | Co Occurence | CREBBP, UBR5   | 11/20 |
| RNF213 | TSC2    | 0.002402821 | 5.232625286 | 50 | 12 | 7  | 16 | Co Occurence | RNF213, TSC2   | 12/23 |

|         |        |             |             |    |    |    |    |              |                |       |
|---------|--------|-------------|-------------|----|----|----|----|--------------|----------------|-------|
| STAG1   | FANCA  | 0.002410634 | 6.642364919 | 60 | 8  | 10 | 7  | Co Occurence | FANCA, STAG1   | 8/17  |
| TPR     | FANCA  | 0.002410634 | 6.642364919 | 60 | 8  | 10 | 7  | Co Occurence | FANCA, TPR     | 8/17  |
| FANCA   | CREBBP | 0.002438802 | 5.580187026 | 55 | 10 | 12 | 8  | Co Occurence | CREBBP, FANCA  | 10/20 |
| KAT6B   | FAT1   | 0.002549108 | 5.808139687 | 52 | 11 | 16 | 6  | Co Occurence | FAT1, KAT6B    | 11/22 |
| POLD1   | FAT1   | 0.002549108 | 5.808139687 | 52 | 11 | 16 | 6  | Co Occurence | FAT1, POLD1    | 11/22 |
| SPEN    | FAT1   | 0.002549108 | 5.808139687 | 52 | 11 | 16 | 6  | Co Occurence | FAT1, SPEN     | 11/22 |
| NF1     | DROSHA | 0.002565276 | 4.941399027 | 51 | 12 | 11 | 11 | Co Occurence | DROSHA, NF1    | 12/22 |
| NIN     | KAT6B  | 0.002612152 | 6.461217338 | 60 | 8  | 9  | 8  | Co Occurence | KAT6B, NIN     | 8/17  |
| TRRAP   | KAT6B  | 0.002612152 | 6.461217338 | 60 | 8  | 9  | 8  | Co Occurence | KAT6B, TRRAP   | 8/17  |
| KAT6A   | MYH9   | 0.002612152 | 6.461217338 | 60 | 8  | 9  | 8  | Co Occurence | KAT6A, MYH9    | 8/17  |
| TRRAP   | MYH9   | 0.002612152 | 6.461217338 | 60 | 8  | 9  | 8  | Co Occurence | MYH9, TRRAP    | 8/17  |
| NIN     | POLD1  | 0.002612152 | 6.461217338 | 60 | 8  | 9  | 8  | Co Occurence | NIN, POLD1     | 8/17  |
| SETD1B  | POLD1  | 0.002612152 | 6.461217338 | 60 | 8  | 9  | 8  | Co Occurence | POLD1, SETD1B  | 8/17  |
| KAT6A   | SPEN   | 0.002612152 | 6.461217338 | 60 | 8  | 9  | 8  | Co Occurence | KAT6A, SPEN    | 8/17  |
| TERT    | SPEN   | 0.002612152 | 6.461217338 | 60 | 8  | 9  | 8  | Co Occurence | SPEN, TERT     | 8/17  |
| SETD1B  | TNC    | 0.002612152 | 6.461217338 | 60 | 8  | 9  | 8  | Co Occurence | SETD1B, TNC    | 8/17  |
| TRRAP   | TNC    | 0.002612152 | 6.461217338 | 60 | 8  | 9  | 8  | Co Occurence | TNC, TRRAP     | 8/17  |
| ARID1B  | DROSHA | 0.002978994 | 5.265879113 | 53 | 11 | 12 | 9  | Co Occurence | ARID1B, DROSHA | 11/21 |
| FLNA    | NF1    | 0.002978994 | 5.265879113 | 53 | 11 | 12 | 9  | Co Occurence | FLNA, NF1      | 11/21 |
| NCOR2   | NF1    | 0.002978994 | 5.265879113 | 53 | 11 | 12 | 9  | Co Occurence | NCOR2, NF1     | 11/21 |
| KAT6B   | ARID1B | 0.003104211 | 5.672289247 | 57 | 9  | 11 | 8  | Co Occurence | ARID1B, KAT6B  | 9/19  |
| MYH9    | ARID1B | 0.003104211 | 5.672289247 | 57 | 9  | 11 | 8  | Co Occurence | ARID1B, MYH9   | 9/19  |
| TNC     | ARID1B | 0.003104211 | 5.672289247 | 57 | 9  | 11 | 8  | Co Occurence | ARID1B, TNC    | 9/19  |
| MYH9    | BCORL1 | 0.003104211 | 5.672289247 | 57 | 9  | 11 | 8  | Co Occurence | BCORL1, MYH9   | 9/19  |
| KAT6B   | FLNA   | 0.003104211 | 5.672289247 | 57 | 9  | 11 | 8  | Co Occurence | FLNA, KAT6B    | 9/19  |
| POLD1   | FLNA   | 0.003104211 | 5.672289247 | 57 | 9  | 11 | 8  | Co Occurence | FLNA, POLD1    | 9/19  |
| KAT6B   | NCOR2  | 0.003104211 | 5.672289247 | 57 | 9  | 11 | 8  | Co Occurence | KAT6B, NCOR2   | 9/19  |
| POLD1   | NCOR2  | 0.003104211 | 5.672289247 | 57 | 9  | 11 | 8  | Co Occurence | NCOR2, POLD1   | 9/19  |
| NSD1    | ARID1B | 0.003138537 | 6.361528828 | 59 | 8  | 12 | 6  | Co Occurence | ARID1B, NSD1   | 8/18  |
| COL1A1  | BCORL1 | 0.003138537 | 6.361528828 | 59 | 8  | 12 | 6  | Co Occurence | BCORL1, COL1A1 | 8/18  |
| N4BP2   | FLNA   | 0.003138537 | 6.361528828 | 59 | 8  | 12 | 6  | Co Occurence | FLNA, N4BP2    | 8/18  |
| NSD1    | UBR5   | 0.003138537 | 6.361528828 | 59 | 8  | 12 | 6  | Co Occurence | NSD1, UBR5     | 8/18  |
| DROSHA  | NCOR1  | 0.003249867 | 5.840044527 | 56 | 9  | 6  | 14 | Co Occurence | DROSHA, NCOR1  | 9/20  |
| NF1     | TPR    | 0.003249867 | 5.840044527 | 56 | 9  | 6  | 14 | Co Occurence | NF1, TPR       | 9/20  |
| SMARCA4 | TPR    | 0.003249867 | 5.840044527 | 56 | 9  | 6  | 14 | Co Occurence | SMARCA4, TPR   | 9/20  |
| DROSHA  | ZMYM3  | 0.003249867 | 5.840044527 | 56 | 9  | 6  | 14 | Co Occurence | DROSHA, ZMYM3  | 9/20  |
| SMARCA4 | ZMYM3  | 0.003249867 | 5.840044527 | 56 | 9  | 6  | 14 | Co Occurence | SMARCA4, ZMYM3 | 9/20  |
| DCC     | EGFR   | 0.003252384 | 6.993011754 | 62 | 7  | 10 | 6  | Co Occurence | DCC, EGFR      | 7/16  |
| COL3A1  | KAT6B  | 0.003252384 | 6.993011754 | 62 | 7  | 10 | 6  | Co Occurence | COL3A1, KAT6B  | 7/16  |



|        |        |             |             |    |    |    |    |              |               |       |
|--------|--------|-------------|-------------|----|----|----|----|--------------|---------------|-------|
| COL3A1 | TNC    | 0.003252384 | 6.993011754 | 62 | 7  | 10 | 6  | Co Occurence | COL3A1, TNC   | 7/16  |
| EGFR   | RNF213 | 0.003326407 | 5.37034673  | 51 | 11 | 17 | 6  | Co Occurence | EGFR, RNF213  | 11/23 |
| POLD1  | RNF213 | 0.003326407 | 5.37034673  | 51 | 11 | 17 | 6  | Co Occurence | POLD1, RNF213 | 11/23 |
| BIRC6  | MTOR   | 0.003326727 | 5.548196764 | 57 | 9  | 9  | 10 | Co Occurence | BIRC6, MTOR   | 9/19  |
| COL1A1 | KAT6A  | 0.003690217 | 6.665363765 | 62 | 7  | 9  | 7  | Co Occurence | COL1A1, KAT6A | 7/16  |
| N4BP2  | KAT6A  | 0.003690217 | 6.665363765 | 62 | 7  | 9  | 7  | Co Occurence | KAT6A, N4BP2  | 7/16  |
| BRCA2  | NIN    | 0.003690217 | 6.665363765 | 62 | 7  | 9  | 7  | Co Occurence | BRCA2, NIN    | 7/16  |
| N4BP2  | NIN    | 0.003690217 | 6.665363765 | 62 | 7  | 9  | 7  | Co Occurence | N4BP2, NIN    | 7/16  |
| NSD1   | NIN    | 0.003690217 | 6.665363765 | 62 | 7  | 9  | 7  | Co Occurence | NIN, NSD1     | 7/16  |
| AXIN1  | TPR    | 0.003788721 | 5.954926393 | 59 | 8  | 7  | 11 | Co Occurence | AXIN1, TPR    | 8/18  |
| BIRC6  | TPR    | 0.003788721 | 5.954926393 | 59 | 8  | 7  | 11 | Co Occurence | BIRC6, TPR    | 8/18  |
| DCC    | COL3A1 | 0.003809858 | 7.662271984 | 65 | 6  | 7  | 7  | Co Occurence | COL3A1, DCC   | 6/14  |
| RET    | DCC    | 0.003809858 | 7.662271984 | 65 | 6  | 7  | 7  | Co Occurence | DCC, RET      | 6/14  |
| RANBP2 | NCOR1  | 0.003845347 | 6.563553731 | 62 | 7  | 8  | 8  | Co Occurence | NCOR1, RANBP2 | 7/16  |
| ZMYM3  | NCOR1  | 0.003845347 | 6.563553731 | 62 | 7  | 8  | 8  | Co Occurence | NCOR1, ZMYM3  | 7/16  |
| ZMYM3  | STAG1  | 0.003845347 | 6.563553731 | 62 | 7  | 8  | 8  | Co Occurence | STAG1, ZMYM3  | 7/16  |
| CREBBP | TERT   | 0.004124296 | 5.397258832 | 56 | 9  | 7  | 13 | Co Occurence | CREBBP, TERT  | 9/20  |
| POLE   | TERT   | 0.004124296 | 5.397258832 | 56 | 9  | 7  | 13 | Co Occurence | POLE, TERT    | 9/20  |
| DROSHA | FAT1   | 0.004211831 | 4.366313224 | 48 | 13 | 14 | 10 | Co Occurence | DROSHA, FAT1  | 13/24 |
| MTOR   | SETD1B | 0.004224295 | 5.735223587 | 59 | 8  | 8  | 10 | Co Occurence | MTOR, SETD1B  | 8/18  |
| MTOR   | TRRAP  | 0.004224295 | 5.735223587 | 59 | 8  | 8  | 10 | Co Occurence | MTOR, TRRAP   | 8/18  |
| TNC    | KAT6B  | 0.004377461 | 5.665582261 | 59 | 8  | 9  | 9  | Co Occurence | KAT6B, TNC    | 8/18  |
| SPEN   | MYH9   | 0.004377461 | 5.665582261 | 59 | 8  | 9  | 9  | Co Occurence | MYH9, SPEN    | 8/18  |
| TNC    | SPEN   | 0.004377461 | 5.665582261 | 59 | 8  | 9  | 9  | Co Occurence | SPEN, TNC     | 8/18  |
| POLE   | CREBBP | 0.004610852 | 4.622907978 | 52 | 11 | 11 | 11 | Co Occurence | CREBBP, POLE  | 11/22 |
| UBR5   | ARID1B | 0.004806175 | 5.36025666  | 55 | 10 | 10 | 10 | Co Occurence | ARID1B, UBR5  | 10/20 |
| UBR5   | BCORL1 | 0.004806175 | 5.36025666  | 55 | 10 | 10 | 10 | Co Occurence | BCORL1, UBR5  | 10/20 |
| UBR5   | FLNA   | 0.004806175 | 5.36025666  | 55 | 10 | 10 | 10 | Co Occurence | FLNA, UBR5    | 10/20 |
| RNF213 | STAG1  | 0.004806394 | 5.63803959  | 52 | 10 | 5  | 18 | Co Occurence | RNF213, STAG1 | 10/23 |
| FAT1   | FLNA   | 0.004820317 | 4.888263464 | 50 | 12 | 8  | 15 | Co Occurence | FAT1, FLNA    | 12/23 |
| FAT1   | NCOR2  | 0.004820317 | 4.888263464 | 50 | 12 | 8  | 15 | Co Occurence | FAT1, NCOR2   | 12/23 |
| FAT1   | UBR5   | 0.004820317 | 4.888263464 | 50 | 12 | 8  | 15 | Co Occurence | FAT1, UBR5    | 12/23 |
| MTOR   | COL3A1 | 0.004924111 | 6.273714793 | 61 | 7  | 6  | 11 | Co Occurence | COL3A1, MTOR  | 7/17  |
| FANCA  | DCC    | 0.004924111 | 6.273714793 | 61 | 7  | 6  | 11 | Co Occurence | DCC, FANCA    | 7/17  |
| MTOR   | DCC    | 0.004924111 | 6.273714793 | 61 | 7  | 6  | 11 | Co Occurence | DCC, MTOR     | 7/17  |
| MTOR   | RET    | 0.004924111 | 6.273714793 | 61 | 7  | 6  | 11 | Co Occurence | MTOR, RET     | 7/17  |
| RET    | DROSHA | 0.004973741 | 5.916809327 | 57 | 8  | 15 | 5  | Co Occurence | DROSHA, RET   | 8/20  |
| DCC    | NF1    | 0.004973741 | 5.916809327 | 57 | 8  | 15 | 5  | Co Occurence | DCC, NF1      | 8/20  |
| MTOR   | NF1    | 0.00536547  | 5.06798172  | 54 | 10 | 13 | 8  | Co Occurence | MTOR, NF1     | 10/21 |

|        |        |             |             |    |    |    |    |              |                |       |
|--------|--------|-------------|-------------|----|----|----|----|--------------|----------------|-------|
| POLD1  | BRCA2  | 0.005733439 | 5.92123383  | 61 | 7  | 7  | 10 | Co Occurence | BRCA2, POLD1   | 7/17  |
| SPEN   | COL1A1 | 0.005733439 | 5.92123383  | 61 | 7  | 7  | 10 | Co Occurence | COL1A1, SPEN   | 7/17  |
| TNC    | COL1A1 | 0.005733439 | 5.92123383  | 61 | 7  | 7  | 10 | Co Occurence | COL1A1, TNC    | 7/17  |
| SPEN   | N4BP2  | 0.005733439 | 5.92123383  | 61 | 7  | 7  | 10 | Co Occurence | N4BP2, SPEN    | 7/17  |
| KAT6B  | NSD1   | 0.005733439 | 5.92123383  | 61 | 7  | 7  | 10 | Co Occurence | KAT6B, NSD1    | 7/17  |
| NCOR1  | ARID1B | 0.00573927  | 5.37946923  | 58 | 8  | 12 | 7  | Co Occurence | ARID1B, NCOR1  | 8/19  |
| ZMYM3  | ARID1B | 0.00573927  | 5.37946923  | 58 | 8  | 12 | 7  | Co Occurence | ARID1B, ZMYM3  | 8/19  |
| STAG1  | BCORL1 | 0.00573927  | 5.37946923  | 58 | 8  | 12 | 7  | Co Occurence | BCORL1, STAG1  | 8/19  |
| NCOR1  | FLNA   | 0.00573927  | 5.37946923  | 58 | 8  | 12 | 7  | Co Occurence | FLNA, NCOR1    | 8/19  |
| RANBP2 | FLNA   | 0.00573927  | 5.37946923  | 58 | 8  | 12 | 7  | Co Occurence | FLNA, RANBP2   | 8/19  |
| TPR    | FLNA   | 0.00573927  | 5.37946923  | 58 | 8  | 12 | 7  | Co Occurence | FLNA, TPR      | 8/19  |
| RANBP2 | UBR5   | 0.00573927  | 5.37946923  | 58 | 8  | 12 | 7  | Co Occurence | RANBP2, UBR5   | 8/19  |
| STAG1  | UBR5   | 0.00573927  | 5.37946923  | 58 | 8  | 12 | 7  | Co Occurence | STAG1, UBR5    | 8/19  |
| ZMYM3  | UBR5   | 0.00573927  | 5.37946923  | 58 | 8  | 12 | 7  | Co Occurence | UBR5, ZMYM3    | 8/19  |
| AXIN1  | CREBBP | 0.005773318 | 4.883010289 | 54 | 10 | 12 | 9  | Co Occurence | AXIN1, CREBBP  | 10/21 |
| AXIN1  | POLE   | 0.005773318 | 4.883010289 | 54 | 10 | 12 | 9  | Co Occurence | AXIN1, POLE    | 10/21 |
| COL3A1 | BRCA2  | 0.006126548 | 6.628193783 | 64 | 6  | 8  | 7  | Co Occurence | BRCA2, COL3A1  | 6/15  |
| DCC    | BRCA2  | 0.006126548 | 6.628193783 | 64 | 6  | 8  | 7  | Co Occurence | BRCA2, DCC     | 6/15  |
| COL3A1 | NSD1   | 0.006126548 | 6.628193783 | 64 | 6  | 8  | 7  | Co Occurence | COL3A1, NSD1   | 6/15  |
| STAG1  | KAT6A  | 0.0061723   | 5.759587046 | 61 | 7  | 9  | 8  | Co Occurence | KAT6A, STAG1   | 7/17  |
| ZMYM3  | KAT6A  | 0.0061723   | 5.759587046 | 61 | 7  | 9  | 8  | Co Occurence | KAT6A, ZMYM3   | 7/17  |
| NCOR1  | NIN    | 0.0061723   | 5.759587046 | 61 | 7  | 9  | 8  | Co Occurence | NCOR1, NIN     | 7/17  |
| RANBP2 | NIN    | 0.0061723   | 5.759587046 | 61 | 7  | 9  | 8  | Co Occurence | NIN, RANBP2    | 7/17  |
| TPR    | NIN    | 0.0061723   | 5.759587046 | 61 | 7  | 9  | 8  | Co Occurence | NIN, TPR       | 7/17  |
| RANBP2 | SETD1B | 0.0061723   | 5.759587046 | 61 | 7  | 9  | 8  | Co Occurence | RANBP2, SETD1B | 7/17  |
| STAG1  | TERT   | 0.0061723   | 5.759587046 | 61 | 7  | 9  | 8  | Co Occurence | STAG1, TERT    | 7/17  |
| ZMYM3  | TERT   | 0.0061723   | 5.759587046 | 61 | 7  | 9  | 8  | Co Occurence | TERT, ZMYM3    | 7/17  |
| STAG1  | TRRAP  | 0.0061723   | 5.759587046 | 61 | 7  | 9  | 8  | Co Occurence | STAG1, TRRAP   | 7/17  |
| TPR    | TRRAP  | 0.0061723   | 5.759587046 | 61 | 7  | 9  | 8  | Co Occurence | TPR, TRRAP     | 7/17  |
| ZMYM3  | TRRAP  | 0.0061723   | 5.759587046 | 61 | 7  | 9  | 8  | Co Occurence | TRRAP, ZMYM3   | 7/17  |
| FAT1   | KAT6A  | 0.006217311 | 4.98287035  | 52 | 10 | 6  | 17 | Co Occurence | FAT1, KAT6A    | 10/23 |
| NIN    | AXIN1  | 0.006547355 | 5.13877401  | 58 | 8  | 11 | 8  | Co Occurence | AXIN1, NIN     | 8/19  |
| TRRAP  | AXIN1  | 0.006547355 | 5.13877401  | 58 | 8  | 11 | 8  | Co Occurence | AXIN1, TRRAP   | 8/19  |
| KAT6A  | BIRC6  | 0.006547355 | 5.13877401  | 58 | 8  | 11 | 8  | Co Occurence | BIRC6, KAT6A   | 8/19  |
| NIN    | BIRC6  | 0.006547355 | 5.13877401  | 58 | 8  | 11 | 8  | Co Occurence | BIRC6, NIN     | 8/19  |
| SETD1B | BIRC6  | 0.006547355 | 5.13877401  | 58 | 8  | 11 | 8  | Co Occurence | BIRC6, SETD1B  | 8/19  |
| SETD1B | DNMT1  | 0.006547355 | 5.13877401  | 58 | 8  | 11 | 8  | Co Occurence | DNMT1, SETD1B  | 8/19  |
| POLE   | COL1A1 | 0.006747583 | 5.291805939 | 57 | 8  | 6  | 14 | Co Occurence | COL1A1, POLE   | 8/20  |
| SPEN   | MTOR   | 0.006981292 | 5.026394334 | 58 | 8  | 10 | 9  | Co Occurence | MTOR, SPEN     | 8/19  |

|         |         |             |             |    |    |    |    |              |                 |       |
|---------|---------|-------------|-------------|----|----|----|----|--------------|-----------------|-------|
| AXIN1   | COL3A1  | 0.007207142 | 5.671592306 | 60 | 7  | 6  | 12 | Co Occurence | AXIN1, COL3A1   | 7/18  |
| TSC2    | COL3A1  | 0.007207142 | 5.671592306 | 60 | 7  | 6  | 12 | Co Occurence | COL3A1, TSC2    | 7/18  |
| TSC2    | RET     | 0.007207142 | 5.671592306 | 60 | 7  | 6  | 12 | Co Occurence | RET, TSC2       | 7/18  |
| AXIN1   | DROSHA  | 0.007710596 | 4.432611604 | 53 | 10 | 13 | 9  | Co Occurence | AXIN1, DROSHA   | 10/22 |
| DNMT1   | DROSHA  | 0.007710596 | 4.432611604 | 53 | 10 | 13 | 9  | Co Occurence | DNMT1, DROSHA   | 10/22 |
| AXIN1   | SMARCA4 | 0.007710596 | 4.432611604 | 53 | 10 | 13 | 9  | Co Occurence | AXIN1, SMARCA4  | 10/22 |
| BIRC6   | SMARCA4 | 0.007710596 | 4.432611604 | 53 | 10 | 13 | 9  | Co Occurence | BIRC6, SMARCA4  | 10/22 |
| DNMT1   | SMARCA4 | 0.007710596 | 4.432611604 | 53 | 10 | 13 | 9  | Co Occurence | DNMT1, SMARCA4  | 10/22 |
| NCOR2   | CREBBP  | 0.00823626  | 4.323390897 | 53 | 10 | 12 | 10 | Co Occurence | CREBBP, NCOR2   | 10/22 |
| BCORL1  | POLE    | 0.00823626  | 4.323390897 | 53 | 10 | 12 | 10 | Co Occurence | BCORL1, POLE    | 10/22 |
| RNF213  | SMARCA4 | 0.008541292 | 3.996685235 | 47 | 13 | 10 | 15 | Co Occurence | RNF213, SMARCA4 | 13/25 |
| NSD1    | FANCA   | 0.008566088 | 5.309269429 | 60 | 7  | 11 | 7  | Co Occurence | FANCA, NSD1     | 7/18  |
| NSD1    | MTOR    | 0.008566088 | 5.309269429 | 60 | 7  | 11 | 7  | Co Occurence | MTOR, NSD1      | 7/18  |
| COL3A1  | RANBP2  | 0.009374988 | 5.820584765 | 63 | 6  | 9  | 7  | Co Occurence | COL3A1, RANBP2  | 6/16  |
| DCC     | STAG1   | 0.009374988 | 5.820584765 | 63 | 6  | 9  | 7  | Co Occurence | DCC, STAG1      | 6/16  |
| COL3A1  | TPR     | 0.009374988 | 5.820584765 | 63 | 6  | 9  | 7  | Co Occurence | COL3A1, TPR     | 6/16  |
| COL3A1  | ZMYM3   | 0.009374988 | 5.820584765 | 63 | 6  | 9  | 7  | Co Occurence | COL3A1, ZMYM3   | 6/16  |
| DCC     | ZMYM3   | 0.009374988 | 5.820584765 | 63 | 6  | 9  | 7  | Co Occurence | DCC, ZMYM3      | 6/16  |
| NSD1    | FAT1    | 0.009377447 | 5.177634287 | 53 | 9  | 18 | 5  | Co Occurence | FAT1, NSD1      | 9/23  |
| FANCA   | BCORL1  | 0.009458029 | 4.967500798 | 56 | 9  | 11 | 9  | Co Occurence | BCORL1, FANCA   | 9/20  |
| FANCA   | UBR5    | 0.009458029 | 4.967500798 | 56 | 9  | 11 | 9  | Co Occurence | FANCA, UBR5     | 9/20  |
| NCOR1   | KAT6B   | 0.009463759 | 5.113474521 | 60 | 7  | 10 | 8  | Co Occurence | KAT6B, NCOR1    | 7/18  |
| STAG1   | KAT6B   | 0.009463759 | 5.113474521 | 60 | 7  | 10 | 8  | Co Occurence | KAT6B, STAG1    | 7/18  |
| TPR     | KAT6B   | 0.009463759 | 5.113474521 | 60 | 7  | 10 | 8  | Co Occurence | KAT6B, TPR      | 7/18  |
| RANBP2  | MYH9    | 0.009463759 | 5.113474521 | 60 | 7  | 10 | 8  | Co Occurence | MYH9, RANBP2    | 7/18  |
| STAG1   | MYH9    | 0.009463759 | 5.113474521 | 60 | 7  | 10 | 8  | Co Occurence | MYH9, STAG1     | 7/18  |
| TPR     | MYH9    | 0.009463759 | 5.113474521 | 60 | 7  | 10 | 8  | Co Occurence | MYH9, TPR       | 7/18  |
| ZMYM3   | MYH9    | 0.009463759 | 5.113474521 | 60 | 7  | 10 | 8  | Co Occurence | MYH9, ZMYM3     | 7/18  |
| RANBP2  | POLD1   | 0.009463759 | 5.113474521 | 60 | 7  | 10 | 8  | Co Occurence | POLD1, RANBP2   | 7/18  |
| TPR     | POLD1   | 0.009463759 | 5.113474521 | 60 | 7  | 10 | 8  | Co Occurence | POLD1, TPR      | 7/18  |
| RANBP2  | SPEN    | 0.009463759 | 5.113474521 | 60 | 7  | 10 | 8  | Co Occurence | RANBP2, SPEN    | 7/18  |
| RANBP2  | TNC     | 0.009463759 | 5.113474521 | 60 | 7  | 10 | 8  | Co Occurence | RANBP2, TNC     | 7/18  |
| TPR     | TNC     | 0.009463759 | 5.113474521 | 60 | 7  | 10 | 8  | Co Occurence | TNC, TPR        | 7/18  |
| DNMT1   | BIRC6   | 0.009563793 | 4.918578136 | 56 | 9  | 10 | 10 | Co Occurence | BIRC6, DNMT1    | 9/20  |
| DROSHA  | SETD1B  | 0.009596999 | 4.932094    | 55 | 9  | 7  | 14 | Co Occurence | DROSHA, SETD1B  | 9/21  |
| SMARCA4 | SETD1B  | 0.009596999 | 4.932094    | 55 | 9  | 7  | 14 | Co Occurence | SETD1B, SMARCA4 | 9/21  |
| COL1A1  | BRCA2   | 0.009730287 | 5.730816429 | 63 | 6  | 8  | 8  | Co Occurence | BRCA2, COL1A1   | 6/16  |
| NSD1    | BRCA2   | 0.009730287 | 5.730816429 | 63 | 6  | 8  | 8  | Co Occurence | BRCA2, NSD1     | 6/16  |
| NSD1    | COL1A1  | 0.009730287 | 5.730816429 | 63 | 6  | 8  | 8  | Co Occurence | COL1A1, NSD1    | 6/16  |

|        |        |             |             |    |    |    |    |              |                |       |
|--------|--------|-------------|-------------|----|----|----|----|--------------|----------------|-------|
| NSD1   | N4BP2  | 0.009730287 | 5.730816429 | 63 | 6  | 8  | 8  | Co Occurence | N4BP2, NSD1    | 6/16  |
| KAT6A  | ARID1B | 0.009779694 | 4.639912054 | 57 | 8  | 12 | 8  | Co Occurence | ARID1B, KAT6A  | 8/20  |
| SETD1B | ARID1B | 0.009779694 | 4.639912054 | 57 | 8  | 12 | 8  | Co Occurence | ARID1B, SETD1B | 8/20  |
| KAT6A  | FLNA   | 0.009779694 | 4.639912054 | 57 | 8  | 12 | 8  | Co Occurence | FLNA, KAT6A    | 8/20  |
| NIN    | FLNA   | 0.009779694 | 4.639912054 | 57 | 8  | 12 | 8  | Co Occurence | FLNA, NIN      | 8/20  |
| NIN    | NCOR2  | 0.009779694 | 4.639912054 | 57 | 8  | 12 | 8  | Co Occurence | NCOR2, NIN     | 8/20  |
| TRRAP  | NCOR2  | 0.009779694 | 4.639912054 | 57 | 8  | 12 | 8  | Co Occurence | NCOR2, TRRAP   | 8/20  |
| NIN    | UBR5   | 0.009779694 | 4.639912054 | 57 | 8  | 12 | 8  | Co Occurence | NIN, UBR5      | 8/20  |
| TERT   | UBR5   | 0.009779694 | 4.639912054 | 57 | 8  | 12 | 8  | Co Occurence | TERT, UBR5     | 8/20  |
| COL3A1 | ARID1B | 0.010240539 | 5.160095319 | 59 | 7  | 13 | 6  | Co Occurence | ARID1B, COL3A1 | 7/19  |
| DCC    | ARID1B | 0.010240539 | 5.160095319 | 59 | 7  | 13 | 6  | Co Occurence | ARID1B, DCC    | 7/19  |
| RET    | ARID1B | 0.010240539 | 5.160095319 | 59 | 7  | 13 | 6  | Co Occurence | ARID1B, RET    | 7/19  |
| RET    | FLNA   | 0.010240539 | 5.160095319 | 59 | 7  | 13 | 6  | Co Occurence | FLNA, RET      | 7/19  |
| RET    | NCOR2  | 0.010240539 | 5.160095319 | 59 | 7  | 13 | 6  | Co Occurence | NCOR2, RET     | 7/19  |
| TSC2   | FAT1   | 0.010395457 | 4.21141028  | 50 | 11 | 16 | 8  | Co Occurence | FAT1, TSC2     | 11/24 |
| CREBBP | NF1    | 0.01041519  | 4.164360659 | 51 | 11 | 12 | 11 | Co Occurence | CREBBP, NF1    | 11/23 |
| MYH9   | CREBBP | 0.010489783 | 4.651654611 | 55 | 9  | 13 | 8  | Co Occurence | CREBBP, MYH9   | 9/21  |
| SPEN   | CREBBP | 0.010489783 | 4.651654611 | 55 | 9  | 13 | 8  | Co Occurence | CREBBP, SPEN   | 9/21  |
| MYH9   | POLE   | 0.010489783 | 4.651654611 | 55 | 9  | 13 | 8  | Co Occurence | MYH9, POLE     | 9/21  |
| RNF213 | BRCA2  | 0.01117961  | 4.818971852 | 52 | 9  | 5  | 19 | Co Occurence | BRCA2, RNF213  | 9/24  |
| ARID1B | BIRC6  | 0.011573299 | 4.401682161 | 55 | 9  | 10 | 11 | Co Occurence | ARID1B, BIRC6  | 9/21  |
| BCORL1 | BIRC6  | 0.011573299 | 4.401682161 | 55 | 9  | 10 | 11 | Co Occurence | BCORL1, BIRC6  | 9/21  |
| FLNA   | DNMT1  | 0.011573299 | 4.401682161 | 55 | 9  | 10 | 11 | Co Occurence | DNMT1, FLNA    | 9/21  |
| ARID1B | TSC2   | 0.011573299 | 4.401682161 | 55 | 9  | 10 | 11 | Co Occurence | ARID1B, TSC2   | 9/21  |
| NCOR2  | TSC2   | 0.011573299 | 4.401682161 | 55 | 9  | 10 | 11 | Co Occurence | NCOR2, TSC2    | 9/21  |
| BRCA2  | BIRC6  | 0.012371139 | 4.797295075 | 59 | 7  | 12 | 7  | Co Occurence | BIRC6, BRCA2   | 7/19  |
| BRCA2  | DNMT1  | 0.012371139 | 4.797295075 | 59 | 7  | 12 | 7  | Co Occurence | BRCA2, DNMT1   | 7/19  |
| BRCA2  | TSC2   | 0.012371139 | 4.797295075 | 59 | 7  | 12 | 7  | Co Occurence | BRCA2, TSC2    | 7/19  |
| N4BP2  | TSC2   | 0.012371139 | 4.797295075 | 59 | 7  | 12 | 7  | Co Occurence | N4BP2, TSC2    | 7/19  |
| EGFR   | NF1    | 0.013019339 | 4.248750205 | 54 | 9  | 14 | 8  | Co Occurence | EGFR, NF1      | 9/22  |
| POLD1  | NF1    | 0.013019339 | 4.248750205 | 54 | 9  | 14 | 8  | Co Occurence | NF1, POLD1     | 9/22  |
| NIN    | COL3A1 | 0.013760383 | 5.171237302 | 62 | 6  | 7  | 10 | Co Occurence | COL3A1, NIN    | 6/17  |
| SETD1B | COL3A1 | 0.013760383 | 5.171237302 | 62 | 6  | 7  | 10 | Co Occurence | COL3A1, SETD1B | 6/17  |
| SETD1B | DCC    | 0.013760383 | 5.171237302 | 62 | 6  | 7  | 10 | Co Occurence | DCC, SETD1B    | 6/17  |
| NIN    | RET    | 0.013760383 | 5.171237302 | 62 | 6  | 7  | 10 | Co Occurence | NIN, RET       | 6/17  |
| MTOR   | STAG1  | 0.013952111 | 4.582739077 | 59 | 7  | 8  | 11 | Co Occurence | MTOR, STAG1    | 7/19  |
| FANCA  | ZMYM3  | 0.013952111 | 4.582739077 | 59 | 7  | 8  | 11 | Co Occurence | FANCA, ZMYM3   | 7/19  |
| MTOR   | ZMYM3  | 0.013952111 | 4.582739077 | 59 | 7  | 8  | 11 | Co Occurence | MTOR, ZMYM3    | 7/19  |
| MTOR   | CREBBP | 0.014342635 | 4.069787908 | 54 | 9  | 13 | 9  | Co Occurence | CREBBP, MTOR   | 9/22  |

|        |         |             |             |    |    |    |    |              |                |       |
|--------|---------|-------------|-------------|----|----|----|----|--------------|----------------|-------|
| RANBP2 | FAT1    | 0.014691094 | 4.247183439 | 52 | 9  | 18 | 6  | Co Occurence | FAT1, RANBP2   | 9/24  |
| ZMYM3  | FAT1    | 0.014691094 | 4.247183439 | 52 | 9  | 18 | 6  | Co Occurence | FAT1, ZMYM3    | 9/24  |
| RANBP2 | BRCA2   | 0.014704462 | 5.03012584  | 62 | 6  | 8  | 9  | Co Occurence | BRCA2, RANBP2  | 6/17  |
| STAG1  | BRCA2   | 0.014704462 | 5.03012584  | 62 | 6  | 8  | 9  | Co Occurence | BRCA2, STAG1   | 6/17  |
| NCOR1  | COL1A1  | 0.014704462 | 5.03012584  | 62 | 6  | 8  | 9  | Co Occurence | COL1A1, NCOR1  | 6/17  |
| TPR    | COL1A1  | 0.014704462 | 5.03012584  | 62 | 6  | 8  | 9  | Co Occurence | COL1A1, TPR    | 6/17  |
| RANBP2 | N4BP2   | 0.014704462 | 5.03012584  | 62 | 6  | 8  | 9  | Co Occurence | N4BP2, RANBP2  | 6/17  |
| TPR    | N4BP2   | 0.014704462 | 5.03012584  | 62 | 6  | 8  | 9  | Co Occurence | N4BP2, TPR     | 6/17  |
| ZMYM3  | N4BP2   | 0.014704462 | 5.03012584  | 62 | 6  | 8  | 9  | Co Occurence | N4BP2, ZMYM3   | 6/17  |
| TPR    | NSD1    | 0.014704462 | 5.03012584  | 62 | 6  | 8  | 9  | Co Occurence | NSD1, TPR      | 6/17  |
| NIN    | EGFR    | 0.014792786 | 4.482555507 | 59 | 7  | 10 | 9  | Co Occurence | EGFR, NIN      | 7/19  |
| TERT   | EGFR    | 0.014792786 | 4.482555507 | 59 | 7  | 10 | 9  | Co Occurence | EGFR, TERT     | 7/19  |
| TRRAP  | EGFR    | 0.014792786 | 4.482555507 | 59 | 7  | 10 | 9  | Co Occurence | EGFR, TRRAP    | 7/19  |
| NIN    | MYH9    | 0.014792786 | 4.482555507 | 59 | 7  | 10 | 9  | Co Occurence | MYH9, NIN      | 7/19  |
| KAT6A  | POLD1   | 0.014792786 | 4.482555507 | 59 | 7  | 10 | 9  | Co Occurence | KAT6A, POLD1   | 7/19  |
| SETD1B | SPEN    | 0.014792786 | 4.482555507 | 59 | 7  | 10 | 9  | Co Occurence | SETD1B, SPEN   | 7/19  |
| TRRAP  | SPEN    | 0.014792786 | 4.482555507 | 59 | 7  | 10 | 9  | Co Occurence | SPEN, TRRAP    | 7/19  |
| KAT6A  | TNC     | 0.014792786 | 4.482555507 | 59 | 7  | 10 | 9  | Co Occurence | KAT6A, TNC     | 7/19  |
| NIN    | TNC     | 0.014792786 | 4.482555507 | 59 | 7  | 10 | 9  | Co Occurence | NIN, TNC       | 7/19  |
| TERT   | TNC     | 0.014792786 | 4.482555507 | 59 | 7  | 10 | 9  | Co Occurence | TERT, TNC      | 7/19  |
| NCOR2  | ARID1B  | 0.015514323 | 3.937216712 | 54 | 9  | 11 | 11 | Co Occurence | ARID1B, NCOR2  | 9/22  |
| UBR5   | NCOR2   | 0.015514323 | 3.937216712 | 54 | 9  | 11 | 11 | Co Occurence | NCOR2, UBR5    | 9/22  |
| BRCA2  | DROSHA  | 0.017160181 | 4.86165515  | 56 | 8  | 15 | 6  | Co Occurence | BRCA2, DROSHA  | 8/21  |
| COL1A1 | NF1     | 0.017160181 | 4.86165515  | 56 | 8  | 15 | 6  | Co Occurence | COL1A1, NF1    | 8/21  |
| NSD1   | NF1     | 0.017160181 | 4.86165515  | 56 | 8  | 15 | 6  | Co Occurence | NF1, NSD1      | 8/21  |
| BRCA2  | SMARCA4 | 0.017160181 | 4.86165515  | 56 | 8  | 15 | 6  | Co Occurence | BRCA2, SMARCA4 | 8/21  |
| NSD1   | SMARCA4 | 0.017160181 | 4.86165515  | 56 | 8  | 15 | 6  | Co Occurence | NSD1, SMARCA4  | 8/21  |
| MYH9   | FAT1    | 0.017252079 | 4.200767139 | 51 | 10 | 17 | 7  | Co Occurence | FAT1, MYH9     | 10/24 |
| BRCA2  | ARID1B  | 0.01734254  | 4.362442279 | 58 | 7  | 13 | 7  | Co Occurence | ARID1B, BRCA2  | 7/20  |
| COL1A1 | UBR5    | 0.01734254  | 4.362442279 | 58 | 7  | 13 | 7  | Co Occurence | COL1A1, UBR5   | 7/20  |
| RNF213 | POLE    | 0.017787538 | 3.466136801 | 47 | 12 | 10 | 16 | Co Occurence | POLE, RNF213   | 12/26 |
| DNMT1  | KAT6B   | 0.01854791  | 4.501512839 | 57 | 8  | 9  | 11 | Co Occurence | DNMT1, KAT6B   | 8/20  |
| AXIN1  | SPEN    | 0.01854791  | 4.501512839 | 57 | 8  | 9  | 11 | Co Occurence | AXIN1, SPEN    | 8/20  |
| MTOR   | FANCA   | 0.018741236 | 4.457191761 | 57 | 8  | 10 | 10 | Co Occurence | FANCA, MTOR    | 8/20  |
| NCOR2  | DROSHA  | 0.018755803 | 3.92277974  | 52 | 10 | 13 | 10 | Co Occurence | DROSHA, NCOR2  | 10/23 |
| FLNA   | SMARCA4 | 0.018755803 | 3.92277974  | 52 | 10 | 13 | 10 | Co Occurence | FLNA, SMARCA4  | 10/23 |
| NCOR2  | SMARCA4 | 0.018755803 | 3.92277974  | 52 | 10 | 13 | 10 | Co Occurence | NCOR2, SMARCA4 | 10/23 |
| CREBBP | STAG1   | 0.018785104 | 4.470464585 | 56 | 8  | 7  | 14 | Co Occurence | CREBBP, STAG1  | 8/21  |
| FANCA  | SMARCA4 | 0.019106498 | 3.715578962 | 53 | 9  | 14 | 9  | Co Occurence | FANCA, SMARCA4 | 9/23  |

|         |        |             |             |    |    |    |    |              |                |       |
|---------|--------|-------------|-------------|----|----|----|----|--------------|----------------|-------|
| KAT6B   | RNF213 | 0.019267268 | 3.894668651 | 50 | 10 | 18 | 7  | Co Occurence | KAT6B, RNF213  | 10/25 |
| TNC     | RNF213 | 0.019267268 | 3.894668651 | 50 | 10 | 18 | 7  | Co Occurence | RNF213, TNC    | 10/25 |
| COL3A1  | MYH9   | 0.01949202  | 4.637654211 | 61 | 6  | 11 | 7  | Co Occurence | COL3A1, MYH9   | 6/18  |
| DCC     | POLD1  | 0.01949202  | 4.637654211 | 61 | 6  | 11 | 7  | Co Occurence | DCC, POLD1     | 6/18  |
| COL3A1  | SPEN   | 0.01949202  | 4.637654211 | 61 | 6  | 11 | 7  | Co Occurence | COL3A1, SPEN   | 6/18  |
| FAT1    | COL3A1 | 0.021114779 | 4.371787089 | 53 | 8  | 5  | 19 | Co Occurence | COL3A1, FAT1   | 8/24  |
| FAT1    | DCC    | 0.021114779 | 4.371787089 | 53 | 8  | 5  | 19 | Co Occurence | DCC, FAT1      | 8/24  |
| FAT1    | RET    | 0.021114779 | 4.371787089 | 53 | 8  | 5  | 19 | Co Occurence | FAT1, RET      | 8/24  |
| BRCA2   | KAT6A  | 0.021313008 | 4.466698789 | 61 | 6  | 10 | 8  | Co Occurence | BRCA2, KAT6A   | 6/18  |
| NSD1    | KAT6A  | 0.021313008 | 4.466698789 | 61 | 6  | 10 | 8  | Co Occurence | KAT6A, NSD1    | 6/18  |
| BRCA2   | SETD1B | 0.021313008 | 4.466698789 | 61 | 6  | 10 | 8  | Co Occurence | BRCA2, SETD1B  | 6/18  |
| COL1A1  | SETD1B | 0.021313008 | 4.466698789 | 61 | 6  | 10 | 8  | Co Occurence | COL1A1, SETD1B | 6/18  |
| N4BP2   | SETD1B | 0.021313008 | 4.466698789 | 61 | 6  | 10 | 8  | Co Occurence | N4BP2, SETD1B  | 6/18  |
| BRCA2   | TERT   | 0.021313008 | 4.466698789 | 61 | 6  | 10 | 8  | Co Occurence | BRCA2, TERT    | 6/18  |
| COL1A1  | TERT   | 0.021313008 | 4.466698789 | 61 | 6  | 10 | 8  | Co Occurence | COL1A1, TERT   | 6/18  |
| NSD1    | TERT   | 0.021313008 | 4.466698789 | 61 | 6  | 10 | 8  | Co Occurence | NSD1, TERT     | 6/18  |
| COL1A1  | TRRAP  | 0.021313008 | 4.466698789 | 61 | 6  | 10 | 8  | Co Occurence | COL1A1, TRRAP  | 6/18  |
| EGFR    | ARID1B | 0.021562388 | 4.062546847 | 56 | 8  | 12 | 9  | Co Occurence | ARID1B, EGFR   | 8/21  |
| POLD1   | BCORL1 | 0.021562388 | 4.062546847 | 56 | 8  | 12 | 9  | Co Occurence | BCORL1, POLD1  | 8/21  |
| SPEN    | BCORL1 | 0.021562388 | 4.062546847 | 56 | 8  | 12 | 9  | Co Occurence | BCORL1, SPEN   | 8/21  |
| TNC     | BCORL1 | 0.021562388 | 4.062546847 | 56 | 8  | 12 | 9  | Co Occurence | BCORL1, TNC    | 8/21  |
| SPEN    | FLNA   | 0.021562388 | 4.062546847 | 56 | 8  | 12 | 9  | Co Occurence | FLNA, SPEN     | 8/21  |
| SPEN    | NCOR2  | 0.021562388 | 4.062546847 | 56 | 8  | 12 | 9  | Co Occurence | NCOR2, SPEN    | 8/21  |
| TNC     | UBR5   | 0.021562388 | 4.062546847 | 56 | 8  | 12 | 9  | Co Occurence | TNC, UBR5      | 8/21  |
| SMARCA4 | NCOR1  | 0.021831834 | 4.105165698 | 55 | 8  | 7  | 15 | Co Occurence | NCOR1, SMARCA4 | 8/22  |
| NF1     | STAG1  | 0.021831834 | 4.105165698 | 55 | 8  | 7  | 15 | Co Occurence | NF1, STAG1     | 8/22  |
| NF1     | ZMYM3  | 0.021831834 | 4.105165698 | 55 | 8  | 7  | 15 | Co Occurence | NF1, ZMYM3     | 8/22  |
| STAG1   | NCOR1  | 0.021943871 | 4.412490105 | 61 | 6  | 9  | 9  | Co Occurence | NCOR1, STAG1   | 6/18  |
| TPR     | NCOR1  | 0.021943871 | 4.412490105 | 61 | 6  | 9  | 9  | Co Occurence | NCOR1, TPR     | 6/18  |
| TPR     | RANBP2 | 0.021943871 | 4.412490105 | 61 | 6  | 9  | 9  | Co Occurence | RANBP2, TPR    | 6/18  |
| TPR     | STAG1  | 0.021943871 | 4.412490105 | 61 | 6  | 9  | 9  | Co Occurence | STAG1, TPR     | 6/18  |
| ZMYM3   | TPR    | 0.021943871 | 4.412490105 | 61 | 6  | 9  | 9  | Co Occurence | TPR, ZMYM3     | 6/18  |
| AXIN1   | FANCA  | 0.022221088 | 3.989820292 | 56 | 8  | 10 | 11 | Co Occurence | AXIN1, FANCA   | 8/21  |
| POLE    | KAT6A  | 0.024520668 | 3.852270368 | 55 | 8  | 8  | 14 | Co Occurence | KAT6A, POLE    | 8/22  |
| CREBBP  | NIN    | 0.024520668 | 3.852270368 | 55 | 8  | 8  | 14 | Co Occurence | CREBBP, NIN    | 8/22  |
| POLE    | NIN    | 0.024520668 | 3.852270368 | 55 | 8  | 8  | 14 | Co Occurence | NIN, POLE      | 8/22  |
| RET     | COL3A1 | 0.024660062 | 4.867283919 | 64 | 5  | 8  | 8  | Co Occurence | COL3A1, RET    | 5/16  |
| RNF213  | RET    | 0.025190295 | 4.080531412 | 52 | 8  | 5  | 20 | Co Occurence | RET, RNF213    | 8/25  |
| FANCA   | COL3A1 | 0.026775974 | 4.191164984 | 60 | 6  | 7  | 12 | Co Occurence | COL3A1, FANCA  | 6/19  |

|         |        |             |             |    |   |    |    |              |                |      |
|---------|--------|-------------|-------------|----|---|----|----|--------------|----------------|------|
| FANCA   | RET    | 0.026775974 | 4.191164984 | 60 | 6 | 7  | 12 | Co Occurence | FANCA, RET     | 6/19 |
| MTOR    | UBR5   | 0.028149383 | 3.599169666 | 55 | 8 | 12 | 10 | Co Occurence | MTOR, UBR5     | 8/22 |
| TSC2    | BIRC6  | 0.028645712 | 3.569872785 | 55 | 8 | 11 | 11 | Co Occurence | BIRC6, TSC2    | 8/22 |
| TSC2    | DNMT1  | 0.028645712 | 3.569872785 | 55 | 8 | 11 | 11 | Co Occurence | DNMT1, TSC2    | 8/22 |
| COL1A1  | EGFR   | 0.029810955 | 4.003788653 | 60 | 6 | 11 | 8  | Co Occurence | COL1A1, EGFR   | 6/19 |
| BRCA2   | MYH9   | 0.029810955 | 4.003788653 | 60 | 6 | 11 | 8  | Co Occurence | BRCA2, MYH9    | 6/19 |
| NSD1    | POLD1  | 0.029810955 | 4.003788653 | 60 | 6 | 11 | 8  | Co Occurence | NSD1, POLD1    | 6/19 |
| NF1     | KAT6A  | 0.030666576 | 3.535893995 | 54 | 8 | 8  | 15 | Co Occurence | KAT6A, NF1     | 8/23 |
| DROSHA  | NIN    | 0.030666576 | 3.535893995 | 54 | 8 | 8  | 15 | Co Occurence | DROSHA, NIN    | 8/23 |
| DROSHA  | TERT   | 0.030666576 | 3.535893995 | 54 | 8 | 8  | 15 | Co Occurence | DROSHA, TERT   | 8/23 |
| SMARCA4 | TRRAP  | 0.030666576 | 3.535893995 | 54 | 8 | 8  | 15 | Co Occurence | SMARCA4, TRRAP | 8/23 |
| RNF213  | NCOR1  | 0.030722572 | 3.951019473 | 51 | 9 | 6  | 19 | Co Occurence | NCOR1, RNF213  | 9/25 |
| RNF213  | TPR    | 0.030722572 | 3.951019473 | 51 | 9 | 6  | 19 | Co Occurence | RNF213, TPR    | 9/25 |
| RNF213  | ZMYM3  | 0.030722572 | 3.951019473 | 51 | 9 | 6  | 19 | Co Occurence | RNF213, ZMYM3  | 9/25 |
| KAT6A   | NCOR1  | 0.031406813 | 3.91633113  | 60 | 6 | 9  | 10 | Co Occurence | KAT6A, NCOR1   | 6/19 |
| TERT    | RANBP2 | 0.031406813 | 3.91633113  | 60 | 6 | 9  | 10 | Co Occurence | RANBP2, TERT   | 6/19 |
| TERT    | TPR    | 0.031406813 | 3.91633113  | 60 | 6 | 9  | 10 | Co Occurence | TERT, TPR      | 6/19 |
| NIN     | ZMYM3  | 0.031406813 | 3.91633113  | 60 | 6 | 9  | 10 | Co Occurence | NIN, ZMYM3     | 6/19 |
| COL3A1  | CREBBP | 0.033333993 | 4.337458546 | 57 | 7 | 15 | 6  | Co Occurence | COL3A1, CREBBP | 7/21 |
| RET     | CREBBP | 0.033333993 | 4.337458546 | 57 | 7 | 15 | 6  | Co Occurence | CREBBP, RET    | 7/21 |
| DCC     | POLE   | 0.033333993 | 4.337458546 | 57 | 7 | 15 | 6  | Co Occurence | DCC, POLE      | 7/21 |
| DNMT1   | POLE   | 0.034103024 | 3.602881622 | 53 | 9 | 13 | 10 | Co Occurence | DNMT1, POLE    | 9/23 |
| CREBBP  | POLD1  | 0.034188079 | 3.369916803 | 54 | 8 | 9  | 14 | Co Occurence | CREBBP, POLD1  | 8/23 |
| POLE    | POLD1  | 0.034188079 | 3.369916803 | 54 | 8 | 9  | 14 | Co Occurence | POLD1, POLE    | 8/23 |
| POLE    | SPEN   | 0.034188079 | 3.369916803 | 54 | 8 | 9  | 14 | Co Occurence | POLE, SPEN     | 8/23 |
| AXIN1   | RANBP2 | 0.034802901 | 4.138762364 | 58 | 7 | 8  | 12 | Co Occurence | AXIN1, RANBP2  | 7/20 |
| BIRC6   | RANBP2 | 0.034802901 | 4.138762364 | 58 | 7 | 8  | 12 | Co Occurence | BIRC6, RANBP2  | 7/20 |
| DNMT1   | RANBP2 | 0.034802901 | 4.138762364 | 58 | 7 | 8  | 12 | Co Occurence | DNMT1, RANBP2  | 7/20 |
| AXIN1   | STAG1  | 0.034802901 | 4.138762364 | 58 | 7 | 8  | 12 | Co Occurence | AXIN1, STAG1   | 7/20 |
| BIRC6   | STAG1  | 0.034802901 | 4.138762364 | 58 | 7 | 8  | 12 | Co Occurence | BIRC6, STAG1   | 7/20 |
| DNMT1   | STAG1  | 0.034802901 | 4.138762364 | 58 | 7 | 8  | 12 | Co Occurence | DNMT1, STAG1   | 7/20 |
| DNMT1   | TPR    | 0.034802901 | 4.138762364 | 58 | 7 | 8  | 12 | Co Occurence | DNMT1, TPR     | 7/20 |
| TSC2    | TPR    | 0.034802901 | 4.138762364 | 58 | 7 | 8  | 12 | Co Occurence | TPR, TSC2      | 7/20 |
| BIRC6   | ZMYM3  | 0.034802901 | 4.138762364 | 58 | 7 | 8  | 12 | Co Occurence | BIRC6, ZMYM3   | 7/20 |
| DCC     | COL1A1 | 0.034956459 | 4.27241002  | 63 | 5 | 9  | 8  | Co Occurence | COL1A1, DCC    | 5/17 |
| RET     | COL1A1 | 0.034956459 | 4.27241002  | 63 | 5 | 9  | 8  | Co Occurence | COL1A1, RET    | 5/17 |
| DCC     | N4BP2  | 0.034956459 | 4.27241002  | 63 | 5 | 9  | 8  | Co Occurence | DCC, N4BP2     | 5/17 |
| RET     | NSD1   | 0.034956459 | 4.27241002  | 63 | 5 | 9  | 8  | Co Occurence | NSD1, RET      | 5/17 |
| TRRAP   | FANCA  | 0.035800815 | 4.015340042 | 58 | 7 | 11 | 9  | Co Occurence | FANCA, TRRAP   | 7/20 |

|        |         |             |             |    |    |    |    |              |                 |       |
|--------|---------|-------------|-------------|----|----|----|----|--------------|-----------------|-------|
| NIN    | MTOR    | 0.035800815 | 4.015340042 | 58 | 7  | 11 | 9  | Co Occurence | MTOR, NIN       | 7/20  |
| SPEN   | KAT6B   | 0.036159144 | 3.975865286 | 58 | 7  | 10 | 10 | Co Occurence | KAT6B, SPEN     | 7/20  |
| COL3A1 | DROSHA  | 0.036618571 | 4.001753551 | 56 | 7  | 16 | 6  | Co Occurence | COL3A1, DROSHA  | 7/22  |
| DCC    | DROSHA  | 0.036618571 | 4.001753551 | 56 | 7  | 16 | 6  | Co Occurence | DCC, DROSHA     | 7/22  |
| RET    | NF1     | 0.036618571 | 4.001753551 | 56 | 7  | 16 | 6  | Co Occurence | NF1, RET        | 7/22  |
| COL3A1 | SMARCA4 | 0.036618571 | 4.001753551 | 56 | 7  | 16 | 6  | Co Occurence | COL3A1, SMARCA4 | 7/22  |
| DCC    | SMARCA4 | 0.036618571 | 4.001753551 | 56 | 7  | 16 | 6  | Co Occurence | DCC, SMARCA4    | 7/22  |
| BIRC6  | DROSHA  | 0.038359698 | 3.287945644 | 52 | 9  | 14 | 10 | Co Occurence | BIRC6, DROSHA   | 9/24  |
| AXIN1  | NF1     | 0.038359698 | 3.287945644 | 52 | 9  | 14 | 10 | Co Occurence | AXIN1, NF1      | 9/24  |
| TSC2   | SMARCA4 | 0.038359698 | 3.287945644 | 52 | 9  | 14 | 10 | Co Occurence | SMARCA4, TSC2   | 9/24  |
| NCOR1  | BCORL1  | 0.03902615  | 3.761920722 | 57 | 7  | 13 | 8  | Co Occurence | BCORL1, NCOR1   | 7/21  |
| RANBP2 | NCOR2   | 0.03902615  | 3.761920722 | 57 | 7  | 13 | 8  | Co Occurence | NCOR2, RANBP2   | 7/21  |
| STAG1  | NCOR2   | 0.03902615  | 3.761920722 | 57 | 7  | 13 | 8  | Co Occurence | NCOR2, STAG1    | 7/21  |
| TPR    | NCOR2   | 0.03902615  | 3.761920722 | 57 | 7  | 13 | 8  | Co Occurence | NCOR2, TPR      | 7/21  |
| ZMYM3  | NCOR2   | 0.03902615  | 3.761920722 | 57 | 7  | 13 | 8  | Co Occurence | NCOR2, ZMYM3    | 7/21  |
| KAT6A  | RNF213  | 0.039156525 | 3.329009159 | 50 | 9  | 19 | 7  | Co Occurence | KAT6A, RNF213   | 9/26  |
| NIN    | RNF213  | 0.039156525 | 3.329009159 | 50 | 9  | 19 | 7  | Co Occurence | NIN, RNF213     | 9/26  |
| CREBBP | ARID1B  | 0.039661573 | 3.219815768 | 52 | 9  | 11 | 13 | Co Occurence | ARID1B, CREBBP  | 9/24  |
| CREBBP | FLNA    | 0.039661573 | 3.219815768 | 52 | 9  | 11 | 13 | Co Occurence | CREBBP, FLNA    | 9/24  |
| POLE   | NCOR2   | 0.039661573 | 3.219815768 | 52 | 9  | 11 | 13 | Co Occurence | NCOR2, POLE     | 9/24  |
| AXIN1  | KAT6A   | 0.041123026 | 3.624722565 | 57 | 7  | 9  | 12 | Co Occurence | AXIN1, KAT6A    | 7/21  |
| DNMT1  | NIN     | 0.041123026 | 3.624722565 | 57 | 7  | 9  | 12 | Co Occurence | DNMT1, NIN      | 7/21  |
| DNMT1  | TRRAP   | 0.041123026 | 3.624722565 | 57 | 7  | 9  | 12 | Co Occurence | DNMT1, TRRAP    | 7/21  |
| BRCA2  | CREBBP  | 0.041421311 | 3.663632262 | 56 | 7  | 15 | 7  | Co Occurence | BRCA2, CREBBP   | 7/22  |
| N4BP2  | POLE    | 0.041421311 | 3.663632262 | 56 | 7  | 15 | 7  | Co Occurence | N4BP2, POLE     | 7/22  |
| FANCA  | KAT6B   | 0.042250741 | 3.559842188 | 57 | 7  | 10 | 11 | Co Occurence | FANCA, KAT6B    | 7/21  |
| MTOR   | KAT6B   | 0.042250741 | 3.559842188 | 57 | 7  | 10 | 11 | Co Occurence | KAT6B, MTOR     | 7/21  |
| MTOR   | TNC     | 0.042250741 | 3.559842188 | 57 | 7  | 10 | 11 | Co Occurence | MTOR, TNC       | 7/21  |
| FAT1   | EGFR    | 0.045382644 | 3.07798646  | 50 | 9  | 8  | 18 | Co Occurence | EGFR, FAT1      | 9/26  |
| NCOR1  | COL3A1  | 0.047747195 | 3.794313773 | 62 | 5  | 8  | 10 | Co Occurence | COL3A1, NCOR1   | 5/18  |
| NCOR1  | RET     | 0.047747195 | 3.794313773 | 62 | 5  | 8  | 10 | Co Occurence | NCOR1, RET      | 5/18  |
| RANBP2 | RET     | 0.047747195 | 3.794313773 | 62 | 5  | 8  | 10 | Co Occurence | RANBP2, RET     | 5/18  |
| ZMYM3  | RET     | 0.047747195 | 3.794313773 | 62 | 5  | 8  | 10 | Co Occurence | RET, ZMYM3      | 5/18  |
| FAT1   | AXIN1   | 0.047810386 | 3.153359657 | 49 | 10 | 9  | 17 | Co Occurence | AXIN1, FAT1     | 10/26 |
| FAT1   | BIRC6   | 0.047810386 | 3.153359657 | 49 | 10 | 9  | 17 | Co Occurence | BIRC6, FAT1     | 10/26 |
| FAT1   | DNMT1   | 0.047810386 | 3.153359657 | 49 | 10 | 9  | 17 | Co Occurence | DNMT1, FAT1     | 10/26 |
| UBR5   | SMARCA4 | 0.048340738 | 2.936838868 | 51 | 9  | 14 | 11 | Co Occurence | SMARCA4, UBR5   | 9/25  |
| POLE   | DROSHA  | 0.048390021 | 3.155185364 | 50 | 10 | 13 | 12 | Co Occurence | DROSHA, POLE    | 10/25 |
| COL1A1 | DROSHA  | 0.048892241 | 3.37829143  | 55 | 7  | 16 | 7  | Co Occurence | COL1A1, DROSHA  | 7/23  |



|         |         |             |             |    |    |    |    |              |                 |       |
|---------|---------|-------------|-------------|----|----|----|----|--------------|-----------------|-------|
| N4BP2   | SMARCA4 | 0.048892241 | 3.37829143  | 55 | 7  | 16 | 7  | Co Occurence | N4BP2, SMARCA4  | 7/23  |
| KAT6A   | BCORL1  | 0.049510532 | 3.293256105 | 56 | 7  | 13 | 9  | Co Occurence | BCORL1, KAT6A   | 7/22  |
| KAT6A   | NCOR2   | 0.049510532 | 3.293256105 | 56 | 7  | 13 | 9  | Co Occurence | KAT6A, NCOR2    | 7/22  |
| KAT6A   | UBR5    | 0.049510532 | 3.293256105 | 56 | 7  | 13 | 9  | Co Occurence | KAT6A, UBR5     | 7/22  |
| AXIN1   | EGFR    | 0.051836321 | 3.21216243  | 56 | 7  | 10 | 12 | Co Occurence | AXIN1, EGFR     | 7/22  |
| BIRC6   | EGFR    | 0.051836321 | 3.21216243  | 56 | 7  | 10 | 12 | Co Occurence | BIRC6, EGFR     | 7/22  |
| BIRC6   | KAT6B   | 0.051836321 | 3.21216243  | 56 | 7  | 10 | 12 | Co Occurence | BIRC6, KAT6B    | 7/22  |
| AXIN1   | POLD1   | 0.051836321 | 3.21216243  | 56 | 7  | 10 | 12 | Co Occurence | AXIN1, POLD1    | 7/22  |
| DNMT1   | SPEN    | 0.051836321 | 3.21216243  | 56 | 7  | 10 | 12 | Co Occurence | DNMT1, SPEN     | 7/22  |
| TSC2    | SPEN    | 0.051836321 | 3.21216243  | 56 | 7  | 10 | 12 | Co Occurence | SPEN, TSC2      | 7/22  |
| SMARCA4 | DROSHA  | 0.05418325  | 2.858604662 | 49 | 10 | 13 | 13 | Co Occurence | DROSHA, SMARCA4 | 10/26 |
| SMARCA4 | NF1     | 0.05418325  | 2.858604662 | 49 | 10 | 13 | 13 | Co Occurence | NF1, SMARCA4    | 10/26 |
| FAT1    | BRCA2   | 0.055451176 | 3.585692659 | 52 | 8  | 6  | 19 | Co Occurence | BRCA2, FAT1     | 8/25  |
| TPR     | CREBBP  | 0.055511125 | 3.1563312   | 55 | 7  | 15 | 8  | Co Occurence | CREBBP, TPR     | 7/23  |
| NCOR1   | POLE    | 0.055511125 | 3.1563312   | 55 | 7  | 15 | 8  | Co Occurence | NCOR1, POLE     | 7/23  |
| N4BP2   | RNF213  | 0.058906421 | 3.345088394 | 51 | 8  | 20 | 6  | Co Occurence | N4BP2, RNF213   | 8/26  |
| FAT1    | POLE    | 0.060504498 | 2.896315382 | 47 | 11 | 11 | 16 | Co Occurence | FAT1, POLE      | 11/27 |
| AXIN1   | ARID1B  | 0.061492228 | 3.21893781  | 54 | 8  | 12 | 11 | Co Occurence | ARID1B, AXIN1   | 8/23  |
| DNMT1   | ARID1B  | 0.061492228 | 3.21893781  | 54 | 8  | 12 | 11 | Co Occurence | ARID1B, DNMT1   | 8/23  |
| AXIN1   | UBR5    | 0.061492228 | 3.21893781  | 54 | 8  | 12 | 11 | Co Occurence | AXIN1, UBR5     | 8/23  |
| BIRC6   | UBR5    | 0.061492228 | 3.21893781  | 54 | 8  | 12 | 11 | Co Occurence | BIRC6, UBR5     | 8/23  |
| DNMT1   | UBR5    | 0.061492228 | 3.21893781  | 54 | 8  | 12 | 11 | Co Occurence | DNMT1, UBR5     | 8/23  |
| COL3A1  | KAT6A   | 0.063195745 | 3.401589    | 61 | 5  | 11 | 8  | Co Occurence | COL3A1, KAT6A   | 5/19  |
| RET     | SETD1B  | 0.063195745 | 3.401589    | 61 | 5  | 11 | 8  | Co Occurence | RET, SETD1B     | 5/19  |
| COL3A1  | TERT    | 0.063195745 | 3.401589    | 61 | 5  | 11 | 8  | Co Occurence | COL3A1, TERT    | 5/19  |
| RET     | AXIN1   | 0.063486266 | 3.812084203 | 59 | 6  | 13 | 7  | Co Occurence | AXIN1, RET      | 6/20  |
| COL3A1  | BIRC6   | 0.063486266 | 3.812084203 | 59 | 6  | 13 | 7  | Co Occurence | BIRC6, COL3A1   | 6/20  |
| RET     | DNMT1   | 0.063486266 | 3.812084203 | 59 | 6  | 13 | 7  | Co Occurence | DNMT1, RET      | 6/20  |
| SPEN    | DROSHA  | 0.063851714 | 3.091658617 | 53 | 8  | 15 | 9  | Co Occurence | DROSHA, SPEN    | 8/24  |
| TNC     | DROSHA  | 0.063851714 | 3.091658617 | 53 | 8  | 15 | 9  | Co Occurence | DROSHA, TNC     | 8/24  |
| KAT6B   | SMARCA4 | 0.063851714 | 3.091658617 | 53 | 8  | 15 | 9  | Co Occurence | KAT6B, SMARCA4  | 8/24  |
| POLD1   | SMARCA4 | 0.063851714 | 3.091658617 | 53 | 8  | 15 | 9  | Co Occurence | POLD1, SMARCA4  | 8/24  |
| RNF213  | CREBBP  | 0.06563735  | 2.6713149   | 46 | 11 | 11 | 17 | Co Occurence | CREBBP, RNF213  | 11/28 |
| POLE    | FANCA   | 0.066689027 | 2.982792022 | 53 | 8  | 10 | 14 | Co Occurence | FANCA, POLE     | 8/24  |
| POLE    | MTOR    | 0.066689027 | 2.982792022 | 53 | 8  | 10 | 14 | Co Occurence | MTOR, POLE      | 8/24  |
| TPR     | FAT1    | 0.067034983 | 3.022489779 | 51 | 8  | 19 | 7  | Co Occurence | FAT1, TPR       | 8/26  |
| EGFR    | NCOR1   | 0.068043857 | 3.508832567 | 59 | 6  | 9  | 11 | Co Occurence | EGFR, NCOR1     | 6/20  |
| KAT6B   | RANBP2  | 0.068043857 | 3.508832567 | 59 | 6  | 9  | 11 | Co Occurence | KAT6B, RANBP2   | 6/20  |
| EGFR    | STAG1   | 0.068043857 | 3.508832567 | 59 | 6  | 9  | 11 | Co Occurence | EGFR, STAG1     | 6/20  |

|        |         |             |             |    |   |    |    |              |                |      |
|--------|---------|-------------|-------------|----|---|----|----|--------------|----------------|------|
| EGFR   | TPR     | 0.068043857 | 3.508832567 | 59 | 6 | 9  | 11 | Co Occurence | EGFR, TPR      | 6/20 |
| EGFR   | ZMYM3   | 0.068043857 | 3.508832567 | 59 | 6 | 9  | 11 | Co Occurence | EGFR, ZMYM3    | 6/20 |
| NCOR2  | COL3A1  | 0.068991809 | 3.486179897 | 58 | 6 | 7  | 14 | Co Occurence | COL3A1, NCOR2  | 6/21 |
| UBR5   | RET     | 0.068991809 | 3.486179897 | 58 | 6 | 7  | 14 | Co Occurence | RET, UBR5      | 6/21 |
| NCOR2  | BCORL1  | 0.069207182 | 2.901486269 | 53 | 8 | 12 | 12 | Co Occurence | BCORL1, NCOR2  | 8/24 |
| NCOR2  | FLNA    | 0.069207182 | 2.901486269 | 53 | 8 | 12 | 12 | Co Occurence | FLNA, NCOR2    | 8/24 |
| BRCA2  | AXIN1   | 0.073759664 | 3.288122748 | 58 | 6 | 13 | 8  | Co Occurence | AXIN1, BRCA2   | 6/21 |
| COL1A1 | AXIN1   | 0.073759664 | 3.288122748 | 58 | 6 | 13 | 8  | Co Occurence | AXIN1, COL1A1  | 6/21 |
| COL1A1 | BIRC6   | 0.073759664 | 3.288122748 | 58 | 6 | 13 | 8  | Co Occurence | BIRC6, COL1A1  | 6/21 |
| N4BP2  | BIRC6   | 0.073759664 | 3.288122748 | 58 | 6 | 13 | 8  | Co Occurence | BIRC6, N4BP2   | 6/21 |
| MTOR   | DROSHA  | 0.076903353 | 2.735534465 | 52 | 8 | 15 | 10 | Co Occurence | DROSHA, MTOR   | 8/25 |
| NCOR1  | MTOR    | 0.077314184 | 3.168224667 | 58 | 6 | 12 | 9  | Co Occurence | MTOR, NCOR1    | 6/21 |
| RANBP2 | MTOR    | 0.077314184 | 3.168224667 | 58 | 6 | 12 | 9  | Co Occurence | MTOR, RANBP2   | 6/21 |
| TPR    | MTOR    | 0.077314184 | 3.168224667 | 58 | 6 | 12 | 9  | Co Occurence | MTOR, TPR      | 6/21 |
| TRRAP  | POLD1   | 0.079202811 | 3.111521763 | 58 | 6 | 11 | 10 | Co Occurence | POLD1, TRRAP   | 6/21 |
| DNMT1  | CREBBP  | 0.080387617 | 2.66546938  | 52 | 8 | 14 | 11 | Co Occurence | CREBBP, DNMT1  | 8/25 |
| BIRC6  | POLE    | 0.080387617 | 2.66546938  | 52 | 8 | 14 | 11 | Co Occurence | BIRC6, POLE    | 8/25 |
| SPEN   | RNF213  | 0.081113278 | 2.861121801 | 49 | 9 | 19 | 8  | Co Occurence | RNF213, SPEN   | 9/27 |
| N4BP2  | BCORL1  | 0.084884659 | 3.005531842 | 57 | 6 | 14 | 8  | Co Occurence | BCORL1, N4BP2  | 6/22 |
| BRCA2  | NCOR2   | 0.084884659 | 3.005531842 | 57 | 6 | 14 | 8  | Co Occurence | BRCA2, NCOR2   | 6/22 |
| COL1A1 | NCOR2   | 0.084884659 | 3.005531842 | 57 | 6 | 14 | 8  | Co Occurence | COL1A1, NCOR2  | 6/22 |
| BRCA2  | UBR5    | 0.084884659 | 3.005531842 | 57 | 6 | 14 | 8  | Co Occurence | BRCA2, UBR5    | 6/22 |
| N4BP2  | UBR5    | 0.084884659 | 3.005531842 | 57 | 6 | 14 | 8  | Co Occurence | N4BP2, UBR5    | 6/22 |
| DCC    | CREBBP  | 0.089210011 | 2.954481713 | 56 | 6 | 16 | 7  | Co Occurence | CREBBP, DCC    | 6/23 |
| COL3A1 | POLE    | 0.089210011 | 2.954481713 | 56 | 6 | 16 | 7  | Co Occurence | COL3A1, POLE   | 6/23 |
| RET    | POLE    | 0.089210011 | 2.954481713 | 56 | 6 | 16 | 7  | Co Occurence | POLE, RET      | 6/23 |
| NCOR1  | BIRC6   | 0.090643635 | 2.879036671 | 57 | 6 | 13 | 9  | Co Occurence | BIRC6, NCOR1   | 6/22 |
| NCOR1  | TSC2    | 0.090643635 | 2.879036671 | 57 | 6 | 13 | 9  | Co Occurence | NCOR1, TSC2    | 6/22 |
| RANBP2 | TSC2    | 0.090643635 | 2.879036671 | 57 | 6 | 13 | 9  | Co Occurence | RANBP2, TSC2   | 6/22 |
| MYH9   | EGFR    | 0.095569536 | 2.785637205 | 57 | 6 | 11 | 11 | Co Occurence | EGFR, MYH9     | 6/22 |
| POLD1  | EGFR    | 0.095569536 | 2.785637205 | 57 | 6 | 11 | 11 | Co Occurence | EGFR, POLD1    | 6/22 |
| SPEN   | EGFR    | 0.095569536 | 2.785637205 | 57 | 6 | 11 | 11 | Co Occurence | EGFR, SPEN     | 6/22 |
| POLD1  | KAT6B   | 0.095569536 | 2.785637205 | 57 | 6 | 11 | 11 | Co Occurence | KAT6B, POLD1   | 6/22 |
| TNC    | MYH9    | 0.095569536 | 2.785637205 | 57 | 6 | 11 | 11 | Co Occurence | MYH9, TNC      | 6/22 |
| TNC    | POLD1   | 0.095569536 | 2.785637205 | 57 | 6 | 11 | 11 | Co Occurence | POLD1, TNC     | 6/22 |
| RET    | SMARCA4 | 0.103815874 | 2.734766095 | 55 | 6 | 17 | 7  | Co Occurence | RET, SMARCA4   | 6/24 |
| RANBP2 | DROSHA  | 0.105110046 | 2.9096627   | 54 | 7 | 16 | 8  | Co Occurence | DROSHA, RANBP2 | 7/24 |
| STAG1  | DROSHA  | 0.105110046 | 2.9096627   | 54 | 7 | 16 | 8  | Co Occurence | DROSHA, STAG1  | 7/24 |
| STAG1  | SMARCA4 | 0.105110046 | 2.9096627   | 54 | 7 | 16 | 8  | Co Occurence | SMARCA4, STAG1 | 7/24 |

|        |         |             |             |    |   |    |    |              |               |      |
|--------|---------|-------------|-------------|----|---|----|----|--------------|---------------|------|
| POLD1  | ARID1B  | 0.105600208 | 2.916994551 | 55 | 7 | 13 | 10 | Co Occurence | ARID1B, POLD1 | 7/23 |
| EGFR   | FLNA    | 0.105600208 | 2.916994551 | 55 | 7 | 13 | 10 | Co Occurence | EGFR, FLNA    | 7/23 |
| TNC    | FLNA    | 0.105600208 | 2.916994551 | 55 | 7 | 13 | 10 | Co Occurence | FLNA, TNC     | 7/23 |
| EGFR   | UBR5    | 0.105600208 | 2.916994551 | 55 | 7 | 13 | 10 | Co Occurence | EGFR, UBR5    | 7/23 |
| MYH9   | UBR5    | 0.105600208 | 2.916994551 | 55 | 7 | 13 | 10 | Co Occurence | MYH9, UBR5    | 7/23 |
| POLD1  | UBR5    | 0.105600208 | 2.916994551 | 55 | 7 | 13 | 10 | Co Occurence | POLD1, UBR5   | 7/23 |
| DNMT1  | FANCA   | 0.106702804 | 2.873879092 | 55 | 7 | 11 | 12 | Co Occurence | DNMT1, FANCA  | 7/23 |
| TSC2   | FANCA   | 0.106702804 | 2.873879092 | 55 | 7 | 11 | 12 | Co Occurence | FANCA, TSC2   | 7/23 |
| KAT6A  | CREBBP  | 0.109969264 | 2.760920595 | 54 | 7 | 15 | 9  | Co Occurence | CREBBP, KAT6A | 7/24 |
| NCOR2  | MTOR    | 0.116626167 | 2.608638505 | 54 | 7 | 11 | 13 | Co Occurence | MTOR, NCOR2   | 7/24 |
| KAT6A  | DROSHA  | 0.121076048 | 2.544088552 | 53 | 7 | 16 | 9  | Co Occurence | DROSHA, KAT6A | 7/25 |
| TRRAP  | DROSHA  | 0.121076048 | 2.544088552 | 53 | 7 | 16 | 9  | Co Occurence | DROSHA, TRRAP | 7/25 |
| NIN    | SMARCA4 | 0.121076048 | 2.544088552 | 53 | 7 | 16 | 9  | Co Occurence | NIN, SMARCA4  | 7/25 |
| TERT   | SMARCA4 | 0.121076048 | 2.544088552 | 53 | 7 | 16 | 9  | Co Occurence | SMARCA4, TERT | 7/25 |
| EGFR   | COL3A1  | 0.123864672 | 3.073270271 | 60 | 5 | 8  | 12 | Co Occurence | COL3A1, EGFR  | 5/20 |
| TNC    | DCC     | 0.123864672 | 3.073270271 | 60 | 5 | 8  | 12 | Co Occurence | DCC, TNC      | 5/20 |
| MYH9   | RET     | 0.123864672 | 3.073270271 | 60 | 5 | 8  | 12 | Co Occurence | MYH9, RET     | 5/20 |
| POLD1  | RET     | 0.123864672 | 3.073270271 | 60 | 5 | 8  | 12 | Co Occurence | POLD1, RET    | 5/20 |
| TNC    | RET     | 0.123864672 | 3.073270271 | 60 | 5 | 8  | 12 | Co Occurence | RET, TNC      | 5/20 |
| FAT1   | N4BP2   | 0.12572482  | 2.519022182 | 51 | 7 | 7  | 20 | Co Occurence | FAT1, N4BP2   | 7/27 |
| N4BP2  | TERT    | 0.127153846 | 2.981638388 | 60 | 5 | 11 | 9  | Co Occurence | N4BP2, TERT   | 5/20 |
| N4BP2  | TRRAP   | 0.127153846 | 2.981638388 | 60 | 5 | 11 | 9  | Co Occurence | N4BP2, TRRAP  | 5/20 |
| POLE   | EGFR    | 0.127679555 | 2.443578989 | 53 | 7 | 10 | 15 | Co Occurence | EGFR, POLE    | 7/25 |
| POLE   | TNC     | 0.127679555 | 2.443578989 | 53 | 7 | 10 | 15 | Co Occurence | POLE, TNC     | 7/25 |
| STAG1  | RANBP2  | 0.128301284 | 2.952306411 | 60 | 5 | 10 | 10 | Co Occurence | RANBP2, STAG1 | 5/20 |
| ZMYM3  | RANBP2  | 0.128301284 | 2.952306411 | 60 | 5 | 10 | 10 | Co Occurence | RANBP2, ZMYM3 | 5/20 |
| NF1    | BIRC6   | 0.14092265  | 2.443345143 | 51 | 8 | 11 | 15 | Co Occurence | BIRC6, NF1    | 8/26 |
| N4BP2  | EGFR    | 0.142503329 | 2.69265571  | 59 | 5 | 12 | 9  | Co Occurence | EGFR, N4BP2   | 5/21 |
| N4BP2  | KAT6B   | 0.142503329 | 2.69265571  | 59 | 5 | 12 | 9  | Co Occurence | KAT6B, N4BP2  | 5/21 |
| COL1A1 | MYH9    | 0.142503329 | 2.69265571  | 59 | 5 | 12 | 9  | Co Occurence | COL1A1, MYH9  | 5/21 |
| N4BP2  | MYH9    | 0.142503329 | 2.69265571  | 59 | 5 | 12 | 9  | Co Occurence | MYH9, N4BP2   | 5/21 |
| COL1A1 | POLD1   | 0.142503329 | 2.69265571  | 59 | 5 | 12 | 9  | Co Occurence | COL1A1, POLD1 | 5/21 |
| N4BP2  | POLD1   | 0.142503329 | 2.69265571  | 59 | 5 | 12 | 9  | Co Occurence | N4BP2, POLD1  | 5/21 |
| NSD1   | SPEN    | 0.142503329 | 2.69265571  | 59 | 5 | 12 | 9  | Co Occurence | NSD1, SPEN    | 5/21 |
| BRCA2  | TNC     | 0.142503329 | 2.69265571  | 59 | 5 | 12 | 9  | Co Occurence | BRCA2, TNC    | 5/21 |
| N4BP2  | TNC     | 0.142503329 | 2.69265571  | 59 | 5 | 12 | 9  | Co Occurence | N4BP2, TNC    | 5/21 |
| NSD1   | TNC     | 0.142503329 | 2.69265571  | 59 | 5 | 12 | 9  | Co Occurence | NSD1, TNC     | 5/21 |
| POLE   | ARID1B  | 0.143033278 | 2.400311763 | 51 | 8 | 12 | 14 | Co Occurence | ARID1B, POLE  | 8/26 |
| KAT6A  | RANBP2  | 0.145512848 | 2.644440473 | 59 | 5 | 10 | 11 | Co Occurence | KAT6A, RANBP2 | 5/21 |

|        |         |             |             |    |    |    |    |              |                 |       |
|--------|---------|-------------|-------------|----|----|----|----|--------------|-----------------|-------|
| KAT6A  | TPR     | 0.145512848 | 2.644440473 | 59 | 5  | 10 | 11 | Co Occurence | KAT6A, TPR      | 5/21  |
| SETD1B | TPR     | 0.145512848 | 2.644440473 | 59 | 5  | 10 | 11 | Co Occurence | SETD1B, TPR     | 5/21  |
| DNMT1  | COL3A1  | 0.153884594 | 2.555091186 | 58 | 5  | 8  | 14 | Co Occurence | COL3A1, DNMT1   | 5/22  |
| BCORL1 | SMARCA4 | 0.157104127 | 2.199312414 | 50 | 8  | 15 | 12 | Co Occurence | BCORL1, SMARCA4 | 8/27  |
| COL1A1 | FANCA   | 0.162608802 | 2.4476023   | 58 | 5  | 13 | 9  | Co Occurence | COL1A1, FANCA   | 5/22  |
| BRCA2  | MTOR    | 0.162608802 | 2.4476023   | 58 | 5  | 13 | 9  | Co Occurence | BRCA2, MTOR     | 5/22  |
| COL1A1 | MTOR    | 0.162608802 | 2.4476023   | 58 | 5  | 13 | 9  | Co Occurence | COL1A1, MTOR    | 5/22  |
| N4BP2  | MTOR    | 0.162608802 | 2.4476023   | 58 | 5  | 13 | 9  | Co Occurence | MTOR, N4BP2     | 5/22  |
| ZMYM3  | POLD1   | 0.168084238 | 2.387315215 | 58 | 5  | 12 | 10 | Co Occurence | POLD1, ZMYM3    | 5/22  |
| ZMYM3  | SPEN    | 0.168084238 | 2.387315215 | 58 | 5  | 12 | 10 | Co Occurence | SPEN, ZMYM3     | 5/22  |
| STAG1  | TNC     | 0.168084238 | 2.387315215 | 58 | 5  | 12 | 10 | Co Occurence | STAG1, TNC      | 5/22  |
| ZMYM3  | TNC     | 0.168084238 | 2.387315215 | 58 | 5  | 12 | 10 | Co Occurence | TNC, ZMYM3      | 5/22  |
| TRRAP  | KAT6A   | 0.169948163 | 2.367901443 | 58 | 5  | 11 | 11 | Co Occurence | KAT6A, TRRAP    | 5/22  |
| COL3A1 | UBR5    | 0.174913083 | 2.347134151 | 57 | 5  | 15 | 8  | Co Occurence | COL3A1, UBR5    | 5/23  |
| DCC    | UBR5    | 0.174913083 | 2.347134151 | 57 | 5  | 15 | 8  | Co Occurence | DCC, UBR5       | 5/23  |
| UBR5   | NCOR1   | 0.175748497 | 2.630832263 | 56 | 6  | 9  | 14 | Co Occurence | NCOR1, UBR5     | 6/23  |
| ARID1B | TPR     | 0.175748497 | 2.630832263 | 56 | 6  | 9  | 14 | Co Occurence | ARID1B, TPR     | 6/23  |
| N4BP2  | CREBBP  | 0.178088824 | 2.545355041 | 55 | 6  | 16 | 8  | Co Occurence | CREBBP, N4BP2   | 6/24  |
| TERT   | BIRC6   | 0.178680273 | 2.551124869 | 56 | 6  | 13 | 10 | Co Occurence | BIRC6, TERT     | 6/23  |
| TRRAP  | BIRC6   | 0.178680273 | 2.551124869 | 56 | 6  | 13 | 10 | Co Occurence | BIRC6, TRRAP    | 6/23  |
| KAT6A  | DNMT1   | 0.178680273 | 2.551124869 | 56 | 6  | 13 | 10 | Co Occurence | DNMT1, KAT6A    | 6/23  |
| KAT6A  | TSC2    | 0.178680273 | 2.551124869 | 56 | 6  | 13 | 10 | Co Occurence | KAT6A, TSC2     | 6/23  |
| FANCA  | EGFR    | 0.18029091  | 2.512988952 | 56 | 6  | 11 | 12 | Co Occurence | EGFR, FANCA     | 6/23  |
| MTOR   | EGFR    | 0.18029091  | 2.512988952 | 56 | 6  | 11 | 12 | Co Occurence | EGFR, MTOR      | 6/23  |
| MTOR   | POLD1   | 0.18029091  | 2.512988952 | 56 | 6  | 11 | 12 | Co Occurence | MTOR, POLD1     | 6/23  |
| N4BP2  | DROSHA  | 0.189015006 | 2.354947783 | 54 | 6  | 17 | 8  | Co Occurence | DROSHA, N4BP2   | 6/25  |
| ARID1B | NIN     | 0.190407376 | 2.33006406  | 55 | 6  | 10 | 14 | Co Occurence | ARID1B, NIN     | 6/24  |
| FAT1   | SMARCA4 | 0.193107399 | 2.01811513  | 45 | 10 | 13 | 17 | Co Occurence | FAT1, SMARCA4   | 10/30 |
| TSC2   | EGFR    | 0.193981327 | 2.281882629 | 55 | 6  | 11 | 13 | Co Occurence | EGFR, TSC2      | 6/24  |
| TSC2   | POLD1   | 0.193981327 | 2.281882629 | 55 | 6  | 11 | 13 | Co Occurence | POLD1, TSC2     | 6/24  |
| AXIN1  | TNC     | 0.193981327 | 2.281882629 | 55 | 6  | 11 | 13 | Co Occurence | AXIN1, TNC      | 6/24  |
| BIRC6  | TNC     | 0.193981327 | 2.281882629 | 55 | 6  | 11 | 13 | Co Occurence | BIRC6, TNC      | 6/24  |
| TSC2   | TNC     | 0.193981327 | 2.281882629 | 55 | 6  | 11 | 13 | Co Occurence | TNC, TSC2       | 6/24  |
| COL1A1 | RNF213  | 0.211661003 | 2.354512671 | 50 | 7  | 21 | 7  | Co Occurence | COL1A1, RNF213  | 7/28  |
| TNC    | NCOR2   | 0.214233717 | 2.083363413 | 54 | 6  | 14 | 11 | Co Occurence | NCOR2, TNC      | 6/25  |
| SPEN   | UBR5    | 0.214233717 | 2.083363413 | 54 | 6  | 14 | 11 | Co Occurence | SPEN, UBR5      | 6/25  |
| COL1A1 | COL3A1  | 0.214508624 | 2.714910132 | 62 | 4  | 9  | 10 | Co Occurence | COL1A1, COL3A1  | 4/19  |
| DNMT1  | MTOR    | 0.217413129 | 2.057027763 | 54 | 6  | 12 | 13 | Co Occurence | DNMT1, MTOR     | 6/25  |
| SPEN   | NF1     | 0.220107442 | 2.250567624 | 52 | 7  | 16 | 10 | Co Occurence | NF1, SPEN       | 7/26  |

|          |          |             |             |    |   |    |    |                    |                  |      |
|----------|----------|-------------|-------------|----|---|----|----|--------------------|------------------|------|
| TNC      | SMARCA4  | 0.220107442 | 2.250567624 | 52 | 7 | 16 | 10 | Co Occurrence      | SMARCA4, TNC     | 7/26 |
| COL3A1   | STAG1    | 0.23214982  | 2.433256658 | 61 | 4 | 11 | 9  | Co Occurrence      | COL3A1, STAG1    | 4/20 |
| RET      | STAG1    | 0.23214982  | 2.433256658 | 61 | 4 | 11 | 9  | Co Occurrence      | RET, STAG1       | 4/20 |
| N4BP2    | BRCA2    | 0.23397212  | 2.409264563 | 61 | 4 | 10 | 10 | Co Occurrence      | BRCA2, N4BP2     | 4/20 |
| BIRC6    | CREBBP   | 0.242358215 | 1.965940964 | 51 | 7 | 15 | 12 | Co Occurrence      | BIRC6, CREBBP    | 7/27 |
| RET      | TERT     | 0.255120472 | 2.197781547 | 60 | 4 | 12 | 9  | Co Occurrence      | RET, TERT        | 4/21 |
| POLD1    | COL3A1   | 0.282617521 | 1.998081357 | 59 | 4 | 9  | 13 | Co Occurrence      | COL3A1, POLD1    | 4/22 |
| EGFR     | RET      | 0.282617521 | 1.998081357 | 59 | 4 | 9  | 13 | Co Occurrence      | EGFR, RET        | 4/22 |
| KAT6B    | RET      | 0.282617521 | 1.998081357 | 59 | 4 | 9  | 13 | Co Occurrence      | KAT6B, RET       | 4/22 |
| AXIN1    | N4BP2    | 0.289293347 | 2.236984756 | 57 | 5 | 9  | 14 | Co Occurrence      | AXIN1, N4BP2     | 5/23 |
| DNMT1    | N4BP2    | 0.289293347 | 2.236984756 | 57 | 5 | 9  | 14 | Co Occurrence      | DNMT1, N4BP2     | 5/23 |
| KAT6A    | EGFR     | 0.295624165 | 2.136772293 | 57 | 5 | 12 | 11 | Co Occurrence      | EGFR, KAT6A      | 5/23 |
| SETD1B   | EGFR     | 0.295624165 | 2.136772293 | 57 | 5 | 12 | 11 | Co Occurrence      | EGFR, SETD1B     | 5/23 |
| ARHGEF10 | RNF213   | 0.297422689 | 0           | 53 | 0 | 28 | 4  | Mutually Exclusive | ARHGEF10, RNF213 | 0/32 |
| N4BP2    | ARID1B   | 0.301761885 | 2.054062878 | 56 | 5 | 15 | 9  | Co Occurrence      | ARID1B, N4BP2    | 5/24 |
| COL1A1   | FLNA     | 0.301761885 | 2.054062878 | 56 | 5 | 15 | 9  | Co Occurrence      | COL1A1, FLNA     | 5/24 |
| N4BP2    | NCOR2    | 0.301761885 | 2.054062878 | 56 | 5 | 15 | 9  | Co Occurrence      | N4BP2, NCOR2     | 5/24 |
| NSD1     | NCOR2    | 0.301761885 | 2.054062878 | 56 | 5 | 15 | 9  | Co Occurrence      | NCOR2, NSD1      | 5/24 |
| KAT6B    | EGFR     | 0.314897241 | 1.92747572  | 56 | 5 | 12 | 12 | Co Occurrence      | EGFR, KAT6B      | 5/24 |
| ARID1B   | STAG1    | 0.330071981 | 1.819015865 | 55 | 5 | 10 | 15 | Co Occurrence      | ARID1B, STAG1    | 5/25 |
| UBR5     | TPR      | 0.330071981 | 1.819015865 | 55 | 5 | 10 | 15 | Co Occurrence      | TPR, UBR5        | 5/25 |
| KAT6A    | SMARCA4  | 0.352522355 | 1.821153642 | 52 | 6 | 17 | 10 | Co Occurrence      | KAT6A, SMARCA4   | 6/27 |
| EGFR     | CREBBP   | 0.3598911   | 1.759905687 | 52 | 6 | 16 | 11 | Co Occurrence      | CREBBP, EGFR     | 6/27 |
| DROSHA   | EGFR     | 0.380769212 | 1.626210794 | 51 | 6 | 11 | 17 | Co Occurrence      | DROSHA, EGFR     | 6/28 |
| SMARCA4  | EGFR     | 0.380769212 | 1.626210794 | 51 | 6 | 11 | 17 | Co Occurrence      | EGFR, SMARCA4    | 6/28 |
| SMARCA4  | SPEN     | 0.380769212 | 1.626210794 | 51 | 6 | 11 | 17 | Co Occurrence      | SMARCA4, SPEN    | 6/28 |
| DROSHA   | UBR5     | 0.395485148 | 1.638685197 | 49 | 7 | 13 | 16 | Co Occurrence      | DROSHA, UBR5     | 7/29 |
| RET      | N4BP2    | 0.442002835 | 1.652499775 | 61 | 3 | 11 | 10 | Co Occurrence      | N4BP2, RET       | 3/21 |
| EGFR     | BRCA2    | 0.464978844 | 1.770971905 | 58 | 4 | 10 | 13 | Co Occurrence      | BRCA2, EGFR      | 4/23 |
| N4BP2    | NF1      | 0.512512548 | 1.625614084 | 53 | 5 | 18 | 9  | Co Occurrence      | N4BP2, NF1       | 5/27 |
| TNC      | DNMT1    | 0.516924099 | 1.597466089 | 54 | 5 | 14 | 12 | Co Occurrence      | DNMT1, TNC       | 5/26 |
| RANBP2   | CREBBP   | 0.521038578 | 1.550138674 | 53 | 5 | 17 | 10 | Co Occurrence      | CREBBP, RANBP2   | 5/27 |
| RANBP2   | POLE     | 0.521038578 | 1.550138674 | 53 | 5 | 17 | 10 | Co Occurrence      | POLE, RANBP2     | 5/27 |
| SPEN     | ARID1B   | 0.533150658 | 1.465122712 | 53 | 5 | 15 | 12 | Co Occurrence      | ARID1B, SPEN     | 5/27 |
| KAT6B    | UBR5     | 0.533150658 | 1.465122712 | 53 | 5 | 15 | 12 | Co Occurrence      | KAT6B, UBR5      | 5/27 |
| RANBP2   | SMARCA4  | 0.537024883 | 1.437867794 | 52 | 5 | 18 | 10 | Co Occurrence      | RANBP2, SMARCA4  | 5/28 |
| CREBBP   | ARHGEF10 | 0.568526041 | 0           | 59 | 0 | 4  | 22 | Mutually Exclusive | ARHGEF10, CREBBP | 0/26 |
| POLE     | ARHGEF10 | 0.568526041 | 0           | 59 | 0 | 4  | 22 | Mutually Exclusive | ARHGEF10, POLE   | 0/26 |
| ARID1B   | ARHGEF10 | 0.568546784 | 0           | 61 | 0 | 4  | 20 | Mutually Exclusive | ARHGEF10, ARID1B | 0/24 |

|          |          |             |             |    |   |    |    |                    |                   |      |
|----------|----------|-------------|-------------|----|---|----|----|--------------------|-------------------|------|
| FLNA     | ARHGEF10 | 0.568546784 | 0           | 61 | 0 | 4  | 20 | Mutually Exclusive | ARHGEF10, FLNA    | 0/24 |
| NCOR2    | ARHGEF10 | 0.568546784 | 0           | 61 | 0 | 4  | 20 | Mutually Exclusive | ARHGEF10, NCOR2   | 0/24 |
| UBR5     | ARHGEF10 | 0.568546784 | 0           | 61 | 0 | 4  | 20 | Mutually Exclusive | ARHGEF10, UBR5    | 0/24 |
| DROSHA   | ARHGEF10 | 0.570393894 | 0           | 58 | 0 | 4  | 23 | Mutually Exclusive | ARHGEF10, DROSHA  | 0/27 |
| NF1      | ARHGEF10 | 0.570393894 | 0           | 58 | 0 | 4  | 23 | Mutually Exclusive | ARHGEF10, NF1     | 0/27 |
| SMARCA4  | ARHGEF10 | 0.570393894 | 0           | 58 | 0 | 4  | 23 | Mutually Exclusive | ARHGEF10, SMARCA4 | 0/27 |
| ARHGEF10 | BIRC6    | 0.570601323 | 0           | 62 | 0 | 19 | 4  | Mutually Exclusive | ARHGEF10, BIRC6   | 0/23 |
| ARHGEF10 | DNMT1    | 0.570601323 | 0           | 62 | 0 | 19 | 4  | Mutually Exclusive | ARHGEF10, DNMT1   | 0/23 |
| ARHGEF10 | TSC2     | 0.570601323 | 0           | 62 | 0 | 19 | 4  | Mutually Exclusive | ARHGEF10, TSC2    | 0/23 |
| ARHGEF10 | TERT     | 0.573040594 | 1.4593469   | 66 | 1 | 15 | 3  | Co Occurence       | ARHGEF10, TERT    | 1/18 |
| ARHGEF10 | FANCA    | 0.574132562 | 0           | 63 | 0 | 18 | 4  | Mutually Exclusive | ARHGEF10, FANCA   | 0/22 |
| ARHGEF10 | MTOR     | 0.574132562 | 0           | 63 | 0 | 18 | 4  | Mutually Exclusive | ARHGEF10, MTOR    | 0/22 |
| KAT6B    | ARHGEF10 | 0.579228412 | 0           | 64 | 0 | 4  | 17 | Mutually Exclusive | ARHGEF10, KAT6B   | 0/21 |
| MYH9     | ARHGEF10 | 0.579228412 | 0           | 64 | 0 | 4  | 17 | Mutually Exclusive | ARHGEF10, MYH9    | 0/21 |
| POLD1    | ARHGEF10 | 0.579228412 | 0           | 64 | 0 | 4  | 17 | Mutually Exclusive | ARHGEF10, POLD1   | 0/21 |
| SPEN     | ARHGEF10 | 0.579228412 | 0           | 64 | 0 | 4  | 17 | Mutually Exclusive | ARHGEF10, SPEN    | 0/21 |
| TNC      | ARHGEF10 | 0.579228412 | 0           | 64 | 0 | 4  | 17 | Mutually Exclusive | ARHGEF10, TNC     | 0/21 |
| N4BP2    | COL1A1   | 0.693371123 | 1.4800373   | 60 | 3 | 11 | 11 | Co Occurence       | COL1A1, N4BP2     | 3/22 |
| RET      | KAT6A    | 0.703766455 | 1.356269401 | 59 | 3 | 13 | 10 | Co Occurence       | KAT6A, RET        | 3/23 |
| RANBP2   | COL1A1   | 0.705995064 | 1.335990597 | 59 | 3 | 11 | 12 | Co Occurence       | COL1A1, RANBP2    | 3/23 |
| NCOR1    | N4BP2    | 0.705995064 | 1.335990597 | 59 | 3 | 11 | 12 | Co Occurence       | N4BP2, NCOR1      | 3/23 |
| ARID1B   | SMARCA4  | 0.776975103 | 1.207281595 | 48 | 6 | 17 | 14 | Co Occurence       | ARID1B, SMARCA4   | 6/31 |
| COL1A1   | ARID1B   | 1           | 0.867743459 | 54 | 3 | 17 | 11 | Mutually Exclusive | ARID1B, COL1A1    | 3/28 |
| SMARCA4  | MTOR     | 1           | 1.046438827 | 49 | 5 | 13 | 18 | Co Occurence       | MTOR, SMARCA4     | 5/31 |
| ARHGEF10 | NCOR1    | 1           | 0           | 66 | 0 | 15 | 4  | Mutually Exclusive | ARHGEF10, NCOR1   | 0/19 |
| ARHGEF10 | RANBP2   | 1           | 0           | 66 | 0 | 15 | 4  | Mutually Exclusive | ARHGEF10, RANBP2  | 0/19 |
| ARHGEF10 | STAG1    | 1           | 0           | 66 | 0 | 15 | 4  | Mutually Exclusive | ARHGEF10, STAG1   | 0/19 |
| ARHGEF10 | TPR      | 1           | 0           | 66 | 0 | 15 | 4  | Mutually Exclusive | ARHGEF10, TPR     | 0/19 |
| ARHGEF10 | ZMYM3    | 1           | 0           | 66 | 0 | 15 | 4  | Mutually Exclusive | ARHGEF10, ZMYM3   | 0/19 |
| FAT1     | ARHGEF10 | 1           | 0.707850831 | 55 | 1 | 3  | 26 | Mutually Exclusive | ARHGEF10, FAT1    | 1/29 |
| BCORL1   | ARHGEF10 | 1           | 1.08663261  | 62 | 1 | 3  | 19 | Co Occurence       | ARHGEF10, BCORL1  | 1/22 |
| EGFR     | ARHGEF10 | 1           | 1.348942985 | 65 | 1 | 3  | 16 | Co Occurence       | ARHGEF10, EGFR    | 1/19 |
| COL3A1   | ARHGEF10 | 1           | 0           | 68 | 0 | 4  | 13 | Mutually Exclusive | ARHGEF10, COL3A1  | 0/17 |
| DCC      | ARHGEF10 | 1           | 0           | 68 | 0 | 4  | 13 | Mutually Exclusive | ARHGEF10, DCC     | 0/17 |
| RET      | ARHGEF10 | 1           | 0           | 68 | 0 | 4  | 13 | Mutually Exclusive | ARHGEF10, RET     | 0/17 |
| EGFR     | NCOR2    | 1           | 1           | 52 | 4 | 16 | 13 | Mutually Exclusive | EGFR, NCOR2       | 4/29 |
| ARHGEF10 | AXIN1    | 1           | 1.164431209 | 63 | 1 | 18 | 3  | Co Occurence       | ARHGEF10, AXIN1   | 1/21 |
| ARHGEF10 | KAT6A    | 1           | 0           | 65 | 0 | 16 | 4  | Mutually Exclusive | ARHGEF10, KAT6A   | 0/20 |
| ARHGEF10 | NIN      | 1           | 0           | 65 | 0 | 16 | 4  | Mutually Exclusive | ARHGEF10, NIN     | 0/20 |

|          |        |   |   |    |   |    |   |                    |                  |      |
|----------|--------|---|---|----|---|----|---|--------------------|------------------|------|
| ARHGEF10 | SETD1B | 1 | 0 | 65 | 0 | 16 | 4 | Mutually Exclusive | ARHGEF10, SETD1B | 0/20 |
| ARHGEF10 | TRRAP  | 1 | 0 | 65 | 0 | 16 | 4 | Mutually Exclusive | ARHGEF10, TRRAP  | 0/20 |
| ARHGEF10 | BRCA2  | 1 | 0 | 67 | 0 | 14 | 4 | Mutually Exclusive | ARHGEF10, BRCA2  | 0/18 |
| ARHGEF10 | COL1A1 | 1 | 0 | 67 | 0 | 14 | 4 | Mutually Exclusive | ARHGEF10, COL1A1 | 0/18 |
| ARHGEF10 | N4BP2  | 1 | 0 | 67 | 0 | 14 | 4 | Mutually Exclusive | ARHGEF10, N4BP2  | 0/18 |
| ARHGEF10 | NSD1   | 1 | 0 | 67 | 0 | 14 | 4 | Mutually Exclusive | ARHGEF10, NSD1   | 0/18 |
