# Supplementary material for: Genomic and immunological profiles of small-cell lung cancer between East Asians and Caucasian
Source: Springer Nature journal article supplement (doi:10.1186/s12935-022-02588-w), 2022-04-29
Supplement: MOESM13 [file 20359852]

Supplementary Table.4 Related to Supplementary Fig. 2b The results of the co-occurrence/mutual exclusivity of oncogenes/TSGs in the Caucasian cohort (significantly mutated driver genes).

| gene1  | gene2    | pValue      | oddsRatio   | 00 | 11 | 01 | 10 | Event         | pair             | event ratio |
|--------|----------|-------------|-------------|----|----|----|----|---------------|------------------|-------------|
| FANCA  | BRCA2    | 0.026315789 | Inf         | 37 | 1  | 0  | 0  | Co Occurrence | BRCA2, FANCA     | 1/0         |
| ZMYM3  | BRCA2    | 0.026315789 | Inf         | 37 | 1  | 0  | 0  | Co Occurrence | BRCA2, ZMYM3     | 1/0         |
| RNF213 | COL3A1   | 0.026315789 | Inf         | 37 | 1  | 0  | 0  | Co Occurrence | COL3A1, RNF213   | 1/0         |
| ZMYM3  | FANCA    | 0.026315789 | Inf         | 37 | 1  | 0  | 0  | Co Occurrence | FANCA, ZMYM3     | 1/0         |
| RANBP2 | KAT6B    | 0.026315789 | Inf         | 37 | 1  | 0  | 0  | Co Occurrence | KAT6B, RANBP2    | 1/0         |
| SETD1B | NSD1     | 0.026315789 | Inf         | 37 | 1  | 0  | 0  | Co Occurrence | NSD1, SETD1B     | 1/0         |
| TPR    | STAG1    | 0.026315789 | Inf         | 37 | 1  | 0  | 0  | Co Occurrence | STAG1, TPR       | 1/0         |
| TSC2   | COL1A1   | 0.052631579 | Inf         | 36 | 1  | 0  | 1  | Co Occurrence | COL1A1, TSC2     | 1/1         |
| NCOR2  | COL3A1   | 0.052631579 | Inf         | 36 | 1  | 0  | 1  | Co Occurrence | COL3A1, NCOR2    | 1/1         |
| ARID1B | KAT6A    | 0.052631579 | Inf         | 36 | 1  | 0  | 1  | Co Occurrence | ARID1B, KAT6A    | 1/1         |
| MTOR   | KAT6A    | 0.052631579 | Inf         | 36 | 1  | 0  | 1  | Co Occurrence | KAT6A, MTOR      | 1/1         |
| ARID1B | KAT6B    | 0.052631579 | Inf         | 36 | 1  | 0  | 1  | Co Occurrence | ARID1B, KAT6B    | 1/1         |
| DNMT1  | N4BP2    | 0.052631579 | Inf         | 36 | 1  | 0  | 1  | Co Occurrence | DNMT1, N4BP2     | 1/1         |
| AXIN1  | NSD1     | 0.052631579 | Inf         | 36 | 1  | 0  | 1  | Co Occurrence | AXIN1, NSD1      | 1/1         |
| ARID1B | RANBP2   | 0.052631579 | Inf         | 36 | 1  | 0  | 1  | Co Occurrence | ARID1B, RANBP2   | 1/1         |
| TRRAP  | RET      | 0.052631579 | Inf         | 36 | 1  | 0  | 1  | Co Occurrence | RET, TRRAP       | 1/1         |
| NCOR2  | RNF213   | 0.052631579 | Inf         | 36 | 1  | 0  | 1  | Co Occurrence | NCOR2, RNF213    | 1/1         |
| AXIN1  | SETD1B   | 0.052631579 | Inf         | 36 | 1  | 0  | 1  | Co Occurrence | AXIN1, SETD1B    | 1/1         |
| UBR5   | SPEN     | 0.052631579 | Inf         | 36 | 1  | 0  | 1  | Co Occurrence | SPEN, UBR5       | 1/1         |
| AXIN1  | TERT     | 0.052631579 | Inf         | 36 | 1  | 0  | 1  | Co Occurrence | AXIN1, TERT      | 1/1         |
| DROSHA | CREBBP   | 0.078947368 | Inf         | 35 | 1  | 2  | 0  | Co Occurrence | CREBBP, DROSHA   | 1/2         |
| NSD1   | CREBBP   | 0.078947368 | Inf         | 35 | 1  | 2  | 0  | Co Occurrence | CREBBP, NSD1     | 1/2         |
| SETD1B | CREBBP   | 0.078947368 | Inf         | 35 | 1  | 2  | 0  | Co Occurrence | CREBBP, SETD1B   | 1/2         |
| SPEN   | CREBBP   | 0.078947368 | Inf         | 35 | 1  | 2  | 0  | Co Occurrence | CREBBP, SPEN     | 1/2         |
| DCC    | EGFR     | 0.078947368 | Inf         | 35 | 1  | 2  | 0  | Co Occurrence | DCC, EGFR        | 1/2         |
| MTOR   | ARID1B   | 0.103840683 | 25.10003671 | 35 | 1  | 1  | 1  | Co Occurrence | ARID1B, MTOR     | 1/2         |
| TERT   | ARHGEF10 | 0.105263158 | Inf         | 34 | 1  | 3  | 0  | Co Occurrence | ARHGEF10, TERT   | 1/3         |
| FAT1   | POLD1    | 0.131578947 | Inf         | 33 | 1  | 0  | 4  | Co Occurrence | FAT1, POLD1      | 1/4         |
| AXIN1  | CREBBP   | 0.153627312 | 14.08907044 | 34 | 1  | 2  | 1  | Co Occurrence | AXIN1, CREBBP    | 1/3         |
| UBR5   | CREBBP   | 0.153627312 | 14.08907044 | 34 | 1  | 2  | 1  | Co Occurrence | CREBBP, UBR5     | 1/3         |
| BCORL1 | EGFR     | 0.153627312 | 14.08907044 | 34 | 1  | 2  | 1  | Co Occurrence | BCORL1, EGFR     | 1/3         |
| UBR5   | POLE     | 0.153627312 | 14.08907044 | 34 | 1  | 2  | 1  | Co Occurrence | POLE, UBR5       | 1/3         |
| AXIN1  | ARHGEF10 | 0.201991465 | 9.669553836 | 33 | 1  | 3  | 1  | Co Occurrence | ARHGEF10, AXIN1  | 1/4         |
| BCORL1 | ARHGEF10 | 0.201991465 | 9.669553836 | 33 | 1  | 3  | 1  | Co Occurrence | ARHGEF10, BCORL1 | 1/4         |
| POLE   | EGFR     | 0.224158369 | 7.391997317 | 33 | 1  | 2  | 2  | Co Occurrence | EGFR, POLE       | 1/4         |
| FAT1   | MTOR     | 0.248933144 | 7.26754141  | 32 | 1  | 1  | 4  | Co Occurrence | FAT1, MTOR       | 1/5         |

|          |        |             |             |    |   |   |   |                    |                  |     |
|----------|--------|-------------|-------------|----|---|---|---|--------------------|------------------|-----|
| FAT1     | UBR5   | 0.248933144 | 7.26754141  | 32 | 1 | 1 | 4 | Co Occurence       | FAT1, UBR5       | 1/5 |
| ARHGEF10 | EGFR   | 0.29065908  | 4.955830938 | 32 | 1 | 2 | 3 | Co Occurence       | ARHGEF10, EGFR   | 1/5 |
| POLE     | FAT1   | 0.353247985 | 3.677238971 | 31 | 1 | 4 | 2 | Co Occurence       | FAT1, POLE       | 1/6 |
| ARHGEF10 | FAT1   | 0.44564113  | 2.423382588 | 30 | 1 | 4 | 3 | Co Occurence       | ARHGEF10, FAT1   | 1/7 |
| ARHGEF10 | CREBBP | 1           | 0           | 31 | 0 | 3 | 4 | Mutually_Exclusive | ARHGEF10, CREBBP | 0/7 |
| ARHGEF10 | POLE   | 1           | 0           | 31 | 0 | 3 | 4 | Mutually_Exclusive | ARHGEF10, POLE   | 0/7 |
| AXIN1    | ARID1B | 1           | 0           | 34 | 0 | 2 | 2 | Mutually_Exclusive | ARID1B, AXIN1    | 0/4 |
| BCORL1   | ARID1B | 1           | 0           | 34 | 0 | 2 | 2 | Mutually_Exclusive | ARID1B, BCORL1   | 0/4 |
| BIRC6    | ARID1B | 1           | 0           | 34 | 0 | 2 | 2 | Mutually_Exclusive | ARID1B, BIRC6    | 0/4 |
| DNMT1    | ARID1B | 1           | 0           | 34 | 0 | 2 | 2 | Mutually_Exclusive | ARID1B, DNMT1    | 0/4 |
| MYH9     | ARID1B | 1           | 0           | 34 | 0 | 2 | 2 | Mutually_Exclusive | ARID1B, MYH9     | 0/4 |
| NCOR2    | ARID1B | 1           | 0           | 34 | 0 | 2 | 2 | Mutually_Exclusive | ARID1B, NCOR2    | 0/4 |
| SMARCA4  | ARID1B | 1           | 0           | 34 | 0 | 2 | 2 | Mutually_Exclusive | ARID1B, SMARCA4  | 0/4 |
| TRRAP    | ARID1B | 1           | 0           | 34 | 0 | 2 | 2 | Mutually_Exclusive | ARID1B, TRRAP    | 0/4 |
| TSC2     | ARID1B | 1           | 0           | 34 | 0 | 2 | 2 | Mutually_Exclusive | ARID1B, TSC2     | 0/4 |
| UBR5     | ARID1B | 1           | 0           | 34 | 0 | 2 | 2 | Mutually_Exclusive | ARID1B, UBR5     | 0/4 |
| BCORL1   | AXIN1  | 1           | 0           | 34 | 0 | 2 | 2 | Mutually_Exclusive | AXIN1, BCORL1    | 0/4 |
| BIRC6    | AXIN1  | 1           | 0           | 34 | 0 | 2 | 2 | Mutually_Exclusive | AXIN1, BIRC6     | 0/4 |
| DNMT1    | AXIN1  | 1           | 0           | 34 | 0 | 2 | 2 | Mutually_Exclusive | AXIN1, DNMT1     | 0/4 |
| MTOR     | AXIN1  | 1           | 0           | 34 | 0 | 2 | 2 | Mutually_Exclusive | AXIN1, MTOR      | 0/4 |

|         |        |   |   |    |   |   |   |                        |                 |     |
|---------|--------|---|---|----|---|---|---|------------------------|-----------------|-----|
| MYH9    | AXIN1  | 1 | 0 | 34 | 0 | 2 | 2 | Mutually_Exclusi<br>ve | AXIN1, MYH9     | 0/4 |
| NCOR2   | AXIN1  | 1 | 0 | 34 | 0 | 2 | 2 | Mutually_Exclusi<br>ve | AXIN1, NCOR2    | 0/4 |
| SMARCA4 | AXIN1  | 1 | 0 | 34 | 0 | 2 | 2 | Mutually_Exclusi<br>ve | AXIN1, SMARCA4  | 0/4 |
| TRRAP   | AXIN1  | 1 | 0 | 34 | 0 | 2 | 2 | Mutually_Exclusi<br>ve | AXIN1, TRRAP    | 0/4 |
| TSC2    | AXIN1  | 1 | 0 | 34 | 0 | 2 | 2 | Mutually_Exclusi<br>ve | AXIN1, TSC2     | 0/4 |
| UBR5    | AXIN1  | 1 | 0 | 34 | 0 | 2 | 2 | Mutually_Exclusi<br>ve | AXIN1, UBR5     | 0/4 |
| BIRC6   | BCORL1 | 1 | 0 | 34 | 0 | 2 | 2 | Mutually_Exclusi<br>ve | BCORL1, BIRC6   | 0/4 |
| DNMT1   | BCORL1 | 1 | 0 | 34 | 0 | 2 | 2 | Mutually_Exclusi<br>ve | BCORL1, DNMT1   | 0/4 |
| MTOR    | BCORL1 | 1 | 0 | 34 | 0 | 2 | 2 | Mutually_Exclusi<br>ve | BCORL1, MTOR    | 0/4 |
| MYH9    | BCORL1 | 1 | 0 | 34 | 0 | 2 | 2 | Mutually_Exclusi<br>ve | BCORL1, MYH9    | 0/4 |
| NCOR2   | BCORL1 | 1 | 0 | 34 | 0 | 2 | 2 | Mutually_Exclusi<br>ve | BCORL1, NCOR2   | 0/4 |
| SMARCA4 | BCORL1 | 1 | 0 | 34 | 0 | 2 | 2 | Mutually_Exclusi<br>ve | BCORL1, SMARCA4 | 0/4 |
| TRRAP   | BCORL1 | 1 | 0 | 34 | 0 | 2 | 2 | Mutually_Exclusi<br>ve | BCORL1, TRRAP   | 0/4 |
| TSC2    | BCORL1 | 1 | 0 | 34 | 0 | 2 | 2 | Mutually_Exclusi<br>ve | BCORL1, TSC2    | 0/4 |
| UBR5    | BCORL1 | 1 | 0 | 34 | 0 | 2 | 2 | Mutually_Exclusi<br>ve | BCORL1, UBR5    | 0/4 |
| DNMT1   | BIRC6  | 1 | 0 | 34 | 0 | 2 | 2 | Mutually_Exclusi<br>ve | BIRC6, DNMT1    | 0/4 |
| MTOR    | BIRC6  | 1 | 0 | 34 | 0 | 2 | 2 | Mutually_Exclusi<br>ve | BIRC6, MTOR     | 0/4 |
| MYH9    | BIRC6  | 1 | 0 | 34 | 0 | 2 | 2 | Mutually_Exclusi<br>ve | BIRC6, MYH9     | 0/4 |

|         |       |   |   |    |   |   |   |                        |                |     |
|---------|-------|---|---|----|---|---|---|------------------------|----------------|-----|
| NCOR2   | BIRC6 | 1 | 0 | 34 | 0 | 2 | 2 | Mutually_Exclusi<br>ve | BIRC6, NCOR2   | 0/4 |
| SMARCA4 | BIRC6 | 1 | 0 | 34 | 0 | 2 | 2 | Mutually_Exclusi<br>ve | BIRC6, SMARCA4 | 0/4 |
| TRRAP   | BIRC6 | 1 | 0 | 34 | 0 | 2 | 2 | Mutually_Exclusi<br>ve | BIRC6, TRRAP   | 0/4 |
| TSC2    | BIRC6 | 1 | 0 | 34 | 0 | 2 | 2 | Mutually_Exclusi<br>ve | BIRC6, TSC2    | 0/4 |
| UBR5    | BIRC6 | 1 | 0 | 34 | 0 | 2 | 2 | Mutually_Exclusi<br>ve | BIRC6, UBR5    | 0/4 |
| MTOR    | DNMT1 | 1 | 0 | 34 | 0 | 2 | 2 | Mutually_Exclusi<br>ve | DNMT1, MTOR    | 0/4 |
| MYH9    | DNMT1 | 1 | 0 | 34 | 0 | 2 | 2 | Mutually_Exclusi<br>ve | DNMT1, MYH9    | 0/4 |
| NCOR2   | DNMT1 | 1 | 0 | 34 | 0 | 2 | 2 | Mutually_Exclusi<br>ve | DNMT1, NCOR2   | 0/4 |
| SMARCA4 | DNMT1 | 1 | 0 | 34 | 0 | 2 | 2 | Mutually_Exclusi<br>ve | DNMT1, SMARCA4 | 0/4 |
| TRRAP   | DNMT1 | 1 | 0 | 34 | 0 | 2 | 2 | Mutually_Exclusi<br>ve | DNMT1, TRRAP   | 0/4 |
| TSC2    | DNMT1 | 1 | 0 | 34 | 0 | 2 | 2 | Mutually_Exclusi<br>ve | DNMT1, TSC2    | 0/4 |
| UBR5    | DNMT1 | 1 | 0 | 34 | 0 | 2 | 2 | Mutually_Exclusi<br>ve | DNMT1, UBR5    | 0/4 |
| MYH9    | MTOR  | 1 | 0 | 34 | 0 | 2 | 2 | Mutually_Exclusi<br>ve | MTOR, MYH9     | 0/4 |
| NCOR2   | MTOR  | 1 | 0 | 34 | 0 | 2 | 2 | Mutually_Exclusi<br>ve | MTOR, NCOR2    | 0/4 |
| SMARCA4 | MTOR  | 1 | 0 | 34 | 0 | 2 | 2 | Mutually_Exclusi<br>ve | MTOR, SMARCA4  | 0/4 |
| TRRAP   | MTOR  | 1 | 0 | 34 | 0 | 2 | 2 | Mutually_Exclusi<br>ve | MTOR, TRRAP    | 0/4 |
| TSC2    | MTOR  | 1 | 0 | 34 | 0 | 2 | 2 | Mutually_Exclusi<br>ve | MTOR, TSC2     | 0/4 |
| UBR5    | MTOR  | 1 | 0 | 34 | 0 | 2 | 2 | Mutually_Exclusi<br>ve | MTOR, UBR5     | 0/4 |

|         |         |   |   |    |   |   |   |                    |                |     |
|---------|---------|---|---|----|---|---|---|--------------------|----------------|-----|
| NCOR2   | MYH9    | 1 | 0 | 34 | 0 | 2 | 2 | Mutually_Exclusive | MYH9, NCOR2    | 0/4 |
| SMARCA4 | MYH9    | 1 | 0 | 34 | 0 | 2 | 2 | Mutually_Exclusive | MYH9, SMARCA4  | 0/4 |
| TRRAP   | MYH9    | 1 | 0 | 34 | 0 | 2 | 2 | Mutually_Exclusive | MYH9, TRRAP    | 0/4 |
| TSC2    | MYH9    | 1 | 0 | 34 | 0 | 2 | 2 | Mutually_Exclusive | MYH9, TSC2     | 0/4 |
| UBR5    | MYH9    | 1 | 0 | 34 | 0 | 2 | 2 | Mutually_Exclusive | MYH9, UBR5     | 0/4 |
| SMARCA4 | NCOR2   | 1 | 0 | 34 | 0 | 2 | 2 | Mutually_Exclusive | NCOR2, SMARCA4 | 0/4 |
| TRRAP   | NCOR2   | 1 | 0 | 34 | 0 | 2 | 2 | Mutually_Exclusive | NCOR2, TRRAP   | 0/4 |
| TSC2    | NCOR2   | 1 | 0 | 34 | 0 | 2 | 2 | Mutually_Exclusive | NCOR2, TSC2    | 0/4 |
| UBR5    | NCOR2   | 1 | 0 | 34 | 0 | 2 | 2 | Mutually_Exclusive | NCOR2, UBR5    | 0/4 |
| TRRAP   | SMARCA4 | 1 | 0 | 34 | 0 | 2 | 2 | Mutually_Exclusive | SMARCA4, TRRAP | 0/4 |
| TSC2    | SMARCA4 | 1 | 0 | 34 | 0 | 2 | 2 | Mutually_Exclusive | SMARCA4, TSC2  | 0/4 |
| UBR5    | SMARCA4 | 1 | 0 | 34 | 0 | 2 | 2 | Mutually_Exclusive | SMARCA4, UBR5  | 0/4 |
| TSC2    | TRRAP   | 1 | 0 | 34 | 0 | 2 | 2 | Mutually_Exclusive | TRRAP, TSC2    | 0/4 |
| UBR5    | TRRAP   | 1 | 0 | 34 | 0 | 2 | 2 | Mutually_Exclusive | TRRAP, UBR5    | 0/4 |
| UBR5    | TSC2    | 1 | 0 | 34 | 0 | 2 | 2 | Mutually_Exclusive | TSC2, UBR5     | 0/4 |
| CREBBP  | FAT1    | 1 | 0 | 30 | 0 | 5 | 3 | Mutually_Exclusive | CREBBP, FAT1   | 0/8 |
| EGFR    | FAT1    | 1 | 0 | 30 | 0 | 5 | 3 | Mutually_Exclusive | EGFR, FAT1     | 0/8 |
| ARID1B  | FAT1    | 1 | 0 | 31 | 0 | 5 | 2 | Mutually_Exclusive | ARID1B, FAT1   | 0/7 |

|         |      |   |   |    |   |   |   |                    |               |     |
|---------|------|---|---|----|---|---|---|--------------------|---------------|-----|
| AXIN1   | FAT1 | 1 | 0 | 31 | 0 | 5 | 2 | Mutually_Exclusive | AXIN1, FAT1   | 0/7 |
| BCORL1  | FAT1 | 1 | 0 | 31 | 0 | 5 | 2 | Mutually_Exclusive | BCORL1, FAT1  | 0/7 |
| BIRC6   | FAT1 | 1 | 0 | 31 | 0 | 5 | 2 | Mutually_Exclusive | BIRC6, FAT1   | 0/7 |
| DNMT1   | FAT1 | 1 | 0 | 31 | 0 | 5 | 2 | Mutually_Exclusive | DNMT1, FAT1   | 0/7 |
| MYH9    | FAT1 | 1 | 0 | 31 | 0 | 5 | 2 | Mutually_Exclusive | FAT1, MYH9    | 0/7 |
| NCOR2   | FAT1 | 1 | 0 | 31 | 0 | 5 | 2 | Mutually_Exclusive | FAT1, NCOR2   | 0/7 |
| SMARCA4 | FAT1 | 1 | 0 | 31 | 0 | 5 | 2 | Mutually_Exclusive | FAT1, SMARCA4 | 0/7 |
| TRRAP   | FAT1 | 1 | 0 | 31 | 0 | 5 | 2 | Mutually_Exclusive | FAT1, TRRAP   | 0/7 |
| TSC2    | FAT1 | 1 | 0 | 31 | 0 | 5 | 2 | Mutually_Exclusive | FAT1, TSC2    | 0/7 |
| BRCA2   | FAT1 | 1 | 0 | 32 | 0 | 5 | 1 | Mutually_Exclusive | BRCA2, FAT1   | 0/6 |
| COL1A1  | FAT1 | 1 | 0 | 32 | 0 | 5 | 1 | Mutually_Exclusive | COL1A1, FAT1  | 0/6 |
| COL3A1  | FAT1 | 1 | 0 | 32 | 0 | 5 | 1 | Mutually_Exclusive | COL3A1, FAT1  | 0/6 |
| DCC     | FAT1 | 1 | 0 | 32 | 0 | 5 | 1 | Mutually_Exclusive | DCC, FAT1     | 0/6 |
| DROSHA  | FAT1 | 1 | 0 | 32 | 0 | 5 | 1 | Mutually_Exclusive | DROSHA, FAT1  | 0/6 |
| FANCA   | FAT1 | 1 | 0 | 32 | 0 | 5 | 1 | Mutually_Exclusive | FANCA, FAT1   | 0/6 |
| FLNA    | FAT1 | 1 | 0 | 32 | 0 | 5 | 1 | Mutually_Exclusive | FAT1, FLNA    | 0/6 |
| KAT6A   | FAT1 | 1 | 0 | 32 | 0 | 5 | 1 | Mutually_Exclusive | FAT1, KAT6A   | 0/6 |
| KAT6B   | FAT1 | 1 | 0 | 32 | 0 | 5 | 1 | Mutually_Exclusive | FAT1, KAT6B   | 0/6 |

|        |          |   |   |    |   |   |   |                    |                  |     |
|--------|----------|---|---|----|---|---|---|--------------------|------------------|-----|
| N4BP2  | FAT1     | 1 | 0 | 32 | 0 | 5 | 1 | Mutually_Exclusive | FAT1, N4BP2      | 0/6 |
| NCOR1  | FAT1     | 1 | 0 | 32 | 0 | 5 | 1 | Mutually_Exclusive | FAT1, NCOR1      | 0/6 |
| NF1    | FAT1     | 1 | 0 | 32 | 0 | 5 | 1 | Mutually_Exclusive | FAT1, NF1        | 0/6 |
| NIN    | FAT1     | 1 | 0 | 32 | 0 | 5 | 1 | Mutually_Exclusive | FAT1, NIN        | 0/6 |
| NSD1   | FAT1     | 1 | 0 | 32 | 0 | 5 | 1 | Mutually_Exclusive | FAT1, NSD1       | 0/6 |
| RANBP2 | FAT1     | 1 | 0 | 32 | 0 | 5 | 1 | Mutually_Exclusive | FAT1, RANBP2     | 0/6 |
| RET    | FAT1     | 1 | 0 | 32 | 0 | 5 | 1 | Mutually_Exclusive | FAT1, RET        | 0/6 |
| RNF213 | FAT1     | 1 | 0 | 32 | 0 | 5 | 1 | Mutually_Exclusive | FAT1, RNF213     | 0/6 |
| SETD1B | FAT1     | 1 | 0 | 32 | 0 | 5 | 1 | Mutually_Exclusive | FAT1, SETD1B     | 0/6 |
| SPEN   | FAT1     | 1 | 0 | 32 | 0 | 5 | 1 | Mutually_Exclusive | FAT1, SPEN       | 0/6 |
| STAG1  | FAT1     | 1 | 0 | 32 | 0 | 5 | 1 | Mutually_Exclusive | FAT1, STAG1      | 0/6 |
| TERT   | FAT1     | 1 | 0 | 32 | 0 | 5 | 1 | Mutually_Exclusive | FAT1, TERT       | 0/6 |
| TNC    | FAT1     | 1 | 0 | 32 | 0 | 5 | 1 | Mutually_Exclusive | FAT1, TNC        | 0/6 |
| TPR    | FAT1     | 1 | 0 | 32 | 0 | 5 | 1 | Mutually_Exclusive | FAT1, TPR        | 0/6 |
| ZMYM3  | FAT1     | 1 | 0 | 32 | 0 | 5 | 1 | Mutually_Exclusive | FAT1, ZMYM3      | 0/6 |
| ARID1B | ARHGEF10 | 1 | 0 | 32 | 0 | 4 | 2 | Mutually_Exclusive | ARHGEF10, ARID1B | 0/6 |
| BIRC6  | ARHGEF10 | 1 | 0 | 32 | 0 | 4 | 2 | Mutually_Exclusive | ARHGEF10, BIRC6  | 0/6 |
| DNMT1  | ARHGEF10 | 1 | 0 | 32 | 0 | 4 | 2 | Mutually_Exclusive | ARHGEF10, DNMT1  | 0/6 |

|         |          |   |   |    |   |   |   |                    |                   |     |
|---------|----------|---|---|----|---|---|---|--------------------|-------------------|-----|
| MTOR    | ARHGEF10 | 1 | 0 | 32 | 0 | 4 | 2 | Mutually_Exclusive | ARHGEF10, MTOR    | 0/6 |
| MYH9    | ARHGEF10 | 1 | 0 | 32 | 0 | 4 | 2 | Mutually_Exclusive | ARHGEF10, MYH9    | 0/6 |
| NCOR2   | ARHGEF10 | 1 | 0 | 32 | 0 | 4 | 2 | Mutually_Exclusive | ARHGEF10, NCOR2   | 0/6 |
| SMARCA4 | ARHGEF10 | 1 | 0 | 32 | 0 | 4 | 2 | Mutually_Exclusive | ARHGEF10, SMARCA4 | 0/6 |
| TRRAP   | ARHGEF10 | 1 | 0 | 32 | 0 | 4 | 2 | Mutually_Exclusive | ARHGEF10, TRRAP   | 0/6 |
| TSC2    | ARHGEF10 | 1 | 0 | 32 | 0 | 4 | 2 | Mutually_Exclusive | ARHGEF10, TSC2    | 0/6 |
| UBR5    | ARHGEF10 | 1 | 0 | 32 | 0 | 4 | 2 | Mutually_Exclusive | ARHGEF10, UBR5    | 0/6 |
| BRCA2   | ARHGEF10 | 1 | 0 | 33 | 0 | 4 | 1 | Mutually_Exclusive | ARHGEF10, BRCA2   | 0/5 |
| COL1A1  | ARHGEF10 | 1 | 0 | 33 | 0 | 4 | 1 | Mutually_Exclusive | ARHGEF10, COL1A1  | 0/5 |
| COL3A1  | ARHGEF10 | 1 | 0 | 33 | 0 | 4 | 1 | Mutually_Exclusive | ARHGEF10, COL3A1  | 0/5 |
| DCC     | ARHGEF10 | 1 | 0 | 33 | 0 | 4 | 1 | Mutually_Exclusive | ARHGEF10, DCC     | 0/5 |
| DROSHA  | ARHGEF10 | 1 | 0 | 33 | 0 | 4 | 1 | Mutually_Exclusive | ARHGEF10, DROSHA  | 0/5 |
| FANCA   | ARHGEF10 | 1 | 0 | 33 | 0 | 4 | 1 | Mutually_Exclusive | ARHGEF10, FANCA   | 0/5 |
| FLNA    | ARHGEF10 | 1 | 0 | 33 | 0 | 4 | 1 | Mutually_Exclusive | ARHGEF10, FLNA    | 0/5 |
| KAT6A   | ARHGEF10 | 1 | 0 | 33 | 0 | 4 | 1 | Mutually_Exclusive | ARHGEF10, KAT6A   | 0/5 |
| KAT6B   | ARHGEF10 | 1 | 0 | 33 | 0 | 4 | 1 | Mutually_Exclusive | ARHGEF10, KAT6B   | 0/5 |
| N4BP2   | ARHGEF10 | 1 | 0 | 33 | 0 | 4 | 1 | Mutually_Exclusive | ARHGEF10, N4BP2   | 0/5 |
| NCOR1   | ARHGEF10 | 1 | 0 | 33 | 0 | 4 | 1 | Mutually_Exclusive | ARHGEF10, NCOR1   | 0/5 |



|        |          |   |   |    |   |   |   |                    |                  |     |
|--------|----------|---|---|----|---|---|---|--------------------|------------------|-----|
| NF1    | ARHGEF10 | 1 | 0 | 33 | 0 | 4 | 1 | Mutually_Exclusive | ARHGEF10, NF1    | 0/5 |
| NIN    | ARHGEF10 | 1 | 0 | 33 | 0 | 4 | 1 | Mutually_Exclusive | ARHGEF10, NIN    | 0/5 |
| NSD1   | ARHGEF10 | 1 | 0 | 33 | 0 | 4 | 1 | Mutually_Exclusive | ARHGEF10, NSD1   | 0/5 |
| POLD1  | ARHGEF10 | 1 | 0 | 33 | 0 | 4 | 1 | Mutually_Exclusive | ARHGEF10, POLD1  | 0/5 |
| RANBP2 | ARHGEF10 | 1 | 0 | 33 | 0 | 4 | 1 | Mutually_Exclusive | ARHGEF10, RANBP2 | 0/5 |
| RET    | ARHGEF10 | 1 | 0 | 33 | 0 | 4 | 1 | Mutually_Exclusive | ARHGEF10, RET    | 0/5 |
| RNF213 | ARHGEF10 | 1 | 0 | 33 | 0 | 4 | 1 | Mutually_Exclusive | ARHGEF10, RNF213 | 0/5 |
| SETD1B | ARHGEF10 | 1 | 0 | 33 | 0 | 4 | 1 | Mutually_Exclusive | ARHGEF10, SETD1B | 0/5 |
| SPEN   | ARHGEF10 | 1 | 0 | 33 | 0 | 4 | 1 | Mutually_Exclusive | ARHGEF10, SPEN   | 0/5 |
| STAG1  | ARHGEF10 | 1 | 0 | 33 | 0 | 4 | 1 | Mutually_Exclusive | ARHGEF10, STAG1  | 0/5 |
| TNC    | ARHGEF10 | 1 | 0 | 33 | 0 | 4 | 1 | Mutually_Exclusive | ARHGEF10, TNC    | 0/5 |
| TPR    | ARHGEF10 | 1 | 0 | 33 | 0 | 4 | 1 | Mutually_Exclusive | ARHGEF10, TPR    | 0/5 |
| ZMYM3  | ARHGEF10 | 1 | 0 | 33 | 0 | 4 | 1 | Mutually_Exclusive | ARHGEF10, ZMYM3  | 0/5 |
| EGFR   | CREBBP   | 1 | 0 | 32 | 0 | 3 | 3 | Mutually_Exclusive | CREBBP, EGFR     | 0/6 |
| POLE   | CREBBP   | 1 | 0 | 32 | 0 | 3 | 3 | Mutually_Exclusive | CREBBP, POLE     | 0/6 |
| ARID1B | CREBBP   | 1 | 0 | 33 | 0 | 3 | 2 | Mutually_Exclusive | ARID1B, CREBBP   | 0/5 |
| BCORL1 | CREBBP   | 1 | 0 | 33 | 0 | 3 | 2 | Mutually_Exclusive | BCORL1, CREBBP   | 0/5 |
| BIRC6  | CREBBP   | 1 | 0 | 33 | 0 | 3 | 2 | Mutually_Exclusive | BIRC6, CREBBP    | 0/5 |

|         |        |   |   |    |   |   |   |                    |                 |     |
|---------|--------|---|---|----|---|---|---|--------------------|-----------------|-----|
| DNMT1   | CREBBP | 1 | 0 | 33 | 0 | 3 | 2 | Mutually_Exclusive | CREBBP, DNMT1   | 0/5 |
| MTOR    | CREBBP | 1 | 0 | 33 | 0 | 3 | 2 | Mutually_Exclusive | CREBBP, MTOR    | 0/5 |
| MYH9    | CREBBP | 1 | 0 | 33 | 0 | 3 | 2 | Mutually_Exclusive | CREBBP, MYH9    | 0/5 |
| NCOR2   | CREBBP | 1 | 0 | 33 | 0 | 3 | 2 | Mutually_Exclusive | CREBBP, NCOR2   | 0/5 |
| SMARCA4 | CREBBP | 1 | 0 | 33 | 0 | 3 | 2 | Mutually_Exclusive | CREBBP, SMARCA4 | 0/5 |
| TRRAP   | CREBBP | 1 | 0 | 33 | 0 | 3 | 2 | Mutually_Exclusive | CREBBP, TRRAP   | 0/5 |
| TSC2    | CREBBP | 1 | 0 | 33 | 0 | 3 | 2 | Mutually_Exclusive | CREBBP, TSC2    | 0/5 |
| BRCA2   | CREBBP | 1 | 0 | 34 | 0 | 3 | 1 | Mutually_Exclusive | BRCA2, CREBBP   | 0/4 |
| COL1A1  | CREBBP | 1 | 0 | 34 | 0 | 3 | 1 | Mutually_Exclusive | COL1A1, CREBBP  | 0/4 |
| COL3A1  | CREBBP | 1 | 0 | 34 | 0 | 3 | 1 | Mutually_Exclusive | COL3A1, CREBBP  | 0/4 |
| DCC     | CREBBP | 1 | 0 | 34 | 0 | 3 | 1 | Mutually_Exclusive | CREBBP, DCC     | 0/4 |
| FANCA   | CREBBP | 1 | 0 | 34 | 0 | 3 | 1 | Mutually_Exclusive | CREBBP, FANCA   | 0/4 |
| FLNA    | CREBBP | 1 | 0 | 34 | 0 | 3 | 1 | Mutually_Exclusive | CREBBP, FLNA    | 0/4 |
| KAT6A   | CREBBP | 1 | 0 | 34 | 0 | 3 | 1 | Mutually_Exclusive | CREBBP, KAT6A   | 0/4 |
| KAT6B   | CREBBP | 1 | 0 | 34 | 0 | 3 | 1 | Mutually_Exclusive | CREBBP, KAT6B   | 0/4 |
| N4BP2   | CREBBP | 1 | 0 | 34 | 0 | 3 | 1 | Mutually_Exclusive | CREBBP, N4BP2   | 0/4 |
| NCOR1   | CREBBP | 1 | 0 | 34 | 0 | 3 | 1 | Mutually_Exclusive | CREBBP, NCOR1   | 0/4 |
| NF1     | CREBBP | 1 | 0 | 34 | 0 | 3 | 1 | Mutually_Exclusive | CREBBP, NF1     | 0/4 |

|         |        |   |   |    |   |   |                      |                |     |
|---------|--------|---|---|----|---|---|----------------------|----------------|-----|
| NIN     | CREBBP | 1 | 0 | 34 | 0 | 3 | 1 Mutually_Exclusive | CREBBP, NIN    | 0/4 |
| POLD1   | CREBBP | 1 | 0 | 34 | 0 | 3 | 1 Mutually_Exclusive | CREBBP, POLD1  | 0/4 |
| RANBP2  | CREBBP | 1 | 0 | 34 | 0 | 3 | 1 Mutually_Exclusive | CREBBP, RANBP2 | 0/4 |
| RET     | CREBBP | 1 | 0 | 34 | 0 | 3 | 1 Mutually_Exclusive | CREBBP, RET    | 0/4 |
| RNF213  | CREBBP | 1 | 0 | 34 | 0 | 3 | 1 Mutually_Exclusive | CREBBP, RNF213 | 0/4 |
| STAG1   | CREBBP | 1 | 0 | 34 | 0 | 3 | 1 Mutually_Exclusive | CREBBP, STAG1  | 0/4 |
| TERT    | CREBBP | 1 | 0 | 34 | 0 | 3 | 1 Mutually_Exclusive | CREBBP, TERT   | 0/4 |
| TNC     | CREBBP | 1 | 0 | 34 | 0 | 3 | 1 Mutually_Exclusive | CREBBP, TNC    | 0/4 |
| TPR     | CREBBP | 1 | 0 | 34 | 0 | 3 | 1 Mutually_Exclusive | CREBBP, TPR    | 0/4 |
| ZMYM3   | CREBBP | 1 | 0 | 34 | 0 | 3 | 1 Mutually_Exclusive | CREBBP, ZMYM3  | 0/4 |
| ARID1B  | EGFR   | 1 | 0 | 33 | 0 | 3 | 2 Mutually_Exclusive | ARID1B, EGFR   | 0/5 |
| AXIN1   | EGFR   | 1 | 0 | 33 | 0 | 3 | 2 Mutually_Exclusive | AXIN1, EGFR    | 0/5 |
| BIRC6   | EGFR   | 1 | 0 | 33 | 0 | 3 | 2 Mutually_Exclusive | BIRC6, EGFR    | 0/5 |
| DNMT1   | EGFR   | 1 | 0 | 33 | 0 | 3 | 2 Mutually_Exclusive | DNMT1, EGFR    | 0/5 |
| MTOR    | EGFR   | 1 | 0 | 33 | 0 | 3 | 2 Mutually_Exclusive | EGFR, MTOR     | 0/5 |
| MYH9    | EGFR   | 1 | 0 | 33 | 0 | 3 | 2 Mutually_Exclusive | EGFR, MYH9     | 0/5 |
| NCOR2   | EGFR   | 1 | 0 | 33 | 0 | 3 | 2 Mutually_Exclusive | EGFR, NCOR2    | 0/5 |
| SMARCA4 | EGFR   | 1 | 0 | 33 | 0 | 3 | 2 Mutually_Exclusive | EGFR, SMARCA4  | 0/5 |

|        |      |   |   |    |   |   |   |                    |              |     |
|--------|------|---|---|----|---|---|---|--------------------|--------------|-----|
| TRRAP  | EGFR | 1 | 0 | 33 | 0 | 3 | 2 | Mutually_Exclusive | EGFR, TRRAP  | 0/5 |
| TSC2   | EGFR | 1 | 0 | 33 | 0 | 3 | 2 | Mutually_Exclusive | EGFR, TSC2   | 0/5 |
| UBR5   | EGFR | 1 | 0 | 33 | 0 | 3 | 2 | Mutually_Exclusive | EGFR, UBR5   | 0/5 |
| BRCA2  | EGFR | 1 | 0 | 34 | 0 | 3 | 1 | Mutually_Exclusive | BRCA2, EGFR  | 0/4 |
| COL1A1 | EGFR | 1 | 0 | 34 | 0 | 3 | 1 | Mutually_Exclusive | COL1A1, EGFR | 0/4 |
| COL3A1 | EGFR | 1 | 0 | 34 | 0 | 3 | 1 | Mutually_Exclusive | COL3A1, EGFR | 0/4 |
| DROSHA | EGFR | 1 | 0 | 34 | 0 | 3 | 1 | Mutually_Exclusive | DROSHA, EGFR | 0/4 |
| FANCA  | EGFR | 1 | 0 | 34 | 0 | 3 | 1 | Mutually_Exclusive | EGFR, FANCA  | 0/4 |
| FLNA   | EGFR | 1 | 0 | 34 | 0 | 3 | 1 | Mutually_Exclusive | EGFR, FLNA   | 0/4 |
| KAT6A  | EGFR | 1 | 0 | 34 | 0 | 3 | 1 | Mutually_Exclusive | EGFR, KAT6A  | 0/4 |
| KAT6B  | EGFR | 1 | 0 | 34 | 0 | 3 | 1 | Mutually_Exclusive | EGFR, KAT6B  | 0/4 |
| N4BP2  | EGFR | 1 | 0 | 34 | 0 | 3 | 1 | Mutually_Exclusive | EGFR, N4BP2  | 0/4 |
| NCOR1  | EGFR | 1 | 0 | 34 | 0 | 3 | 1 | Mutually_Exclusive | EGFR, NCOR1  | 0/4 |
| NF1    | EGFR | 1 | 0 | 34 | 0 | 3 | 1 | Mutually_Exclusive | EGFR, NF1    | 0/4 |
| NIN    | EGFR | 1 | 0 | 34 | 0 | 3 | 1 | Mutually_Exclusive | EGFR, NIN    | 0/4 |
| NSD1   | EGFR | 1 | 0 | 34 | 0 | 3 | 1 | Mutually_Exclusive | EGFR, NSD1   | 0/4 |
| POLD1  | EGFR | 1 | 0 | 34 | 0 | 3 | 1 | Mutually_Exclusive | EGFR, POLD1  | 0/4 |
| RANBP2 | EGFR | 1 | 0 | 34 | 0 | 3 | 1 | Mutually_Exclusive | EGFR, RANBP2 | 0/4 |

|         |      |   |   |    |   |   |                      |               |     |
|---------|------|---|---|----|---|---|----------------------|---------------|-----|
| RET     | EGFR | 1 | 0 | 34 | 0 | 3 | 1 Mutually_Exclusive | EGFR, RET     | 0/4 |
| RNF213  | EGFR | 1 | 0 | 34 | 0 | 3 | 1 Mutually_Exclusive | EGFR, RNF213  | 0/4 |
| SETD1B  | EGFR | 1 | 0 | 34 | 0 | 3 | 1 Mutually_Exclusive | EGFR, SETD1B  | 0/4 |
| SPEN    | EGFR | 1 | 0 | 34 | 0 | 3 | 1 Mutually_Exclusive | EGFR, SPEN    | 0/4 |
| STAG1   | EGFR | 1 | 0 | 34 | 0 | 3 | 1 Mutually_Exclusive | EGFR, STAG1   | 0/4 |
| TERT    | EGFR | 1 | 0 | 34 | 0 | 3 | 1 Mutually_Exclusive | EGFR, TERT    | 0/4 |
| TNC     | EGFR | 1 | 0 | 34 | 0 | 3 | 1 Mutually_Exclusive | EGFR, TNC     | 0/4 |
| TPR     | EGFR | 1 | 0 | 34 | 0 | 3 | 1 Mutually_Exclusive | EGFR, TPR     | 0/4 |
| ZMYM3   | EGFR | 1 | 0 | 34 | 0 | 3 | 1 Mutually_Exclusive | EGFR, ZMYM3   | 0/4 |
| ARID1B  | POLE | 1 | 0 | 33 | 0 | 3 | 2 Mutually_Exclusive | ARID1B, POLE  | 0/5 |
| AXIN1   | POLE | 1 | 0 | 33 | 0 | 3 | 2 Mutually_Exclusive | AXIN1, POLE   | 0/5 |
| BCORL1  | POLE | 1 | 0 | 33 | 0 | 3 | 2 Mutually_Exclusive | BCORL1, POLE  | 0/5 |
| BIRC6   | POLE | 1 | 0 | 33 | 0 | 3 | 2 Mutually_Exclusive | BIRC6, POLE   | 0/5 |
| DNMT1   | POLE | 1 | 0 | 33 | 0 | 3 | 2 Mutually_Exclusive | DNMT1, POLE   | 0/5 |
| MTOR    | POLE | 1 | 0 | 33 | 0 | 3 | 2 Mutually_Exclusive | MTOR, POLE    | 0/5 |
| MYH9    | POLE | 1 | 0 | 33 | 0 | 3 | 2 Mutually_Exclusive | MYH9, POLE    | 0/5 |
| NCOR2   | POLE | 1 | 0 | 33 | 0 | 3 | 2 Mutually_Exclusive | NCOR2, POLE   | 0/5 |
| SMARCA4 | POLE | 1 | 0 | 33 | 0 | 3 | 2 Mutually_Exclusive | POLE, SMARCA4 | 0/5 |

|        |      |   |   |    |   |   |                      |              |     |
|--------|------|---|---|----|---|---|----------------------|--------------|-----|
| TRRAP  | POLE | 1 | 0 | 33 | 0 | 3 | 2 Mutually_Exclusive | POLE, TRRAP  | 0/5 |
| TSC2   | POLE | 1 | 0 | 33 | 0 | 3 | 2 Mutually_Exclusive | POLE, TSC2   | 0/5 |
| BRCA2  | POLE | 1 | 0 | 34 | 0 | 3 | 1 Mutually_Exclusive | BRCA2, POLE  | 0/4 |
| COL1A1 | POLE | 1 | 0 | 34 | 0 | 3 | 1 Mutually_Exclusive | COL1A1, POLE | 0/4 |
| COL3A1 | POLE | 1 | 0 | 34 | 0 | 3 | 1 Mutually_Exclusive | COL3A1, POLE | 0/4 |
| DCC    | POLE | 1 | 0 | 34 | 0 | 3 | 1 Mutually_Exclusive | DCC, POLE    | 0/4 |
| DROSHA | POLE | 1 | 0 | 34 | 0 | 3 | 1 Mutually_Exclusive | DROSHA, POLE | 0/4 |
| FANCA  | POLE | 1 | 0 | 34 | 0 | 3 | 1 Mutually_Exclusive | FANCA, POLE  | 0/4 |
| FLNA   | POLE | 1 | 0 | 34 | 0 | 3 | 1 Mutually_Exclusive | FLNA, POLE   | 0/4 |
| KAT6A  | POLE | 1 | 0 | 34 | 0 | 3 | 1 Mutually_Exclusive | KAT6A, POLE  | 0/4 |
| KAT6B  | POLE | 1 | 0 | 34 | 0 | 3 | 1 Mutually_Exclusive | KAT6B, POLE  | 0/4 |
| N4BP2  | POLE | 1 | 0 | 34 | 0 | 3 | 1 Mutually_Exclusive | N4BP2, POLE  | 0/4 |
| NCOR1  | POLE | 1 | 0 | 34 | 0 | 3 | 1 Mutually_Exclusive | NCOR1, POLE  | 0/4 |
| NF1    | POLE | 1 | 0 | 34 | 0 | 3 | 1 Mutually_Exclusive | NF1, POLE    | 0/4 |
| NIN    | POLE | 1 | 0 | 34 | 0 | 3 | 1 Mutually_Exclusive | NIN, POLE    | 0/4 |
| NSD1   | POLE | 1 | 0 | 34 | 0 | 3 | 1 Mutually_Exclusive | NSD1, POLE   | 0/4 |
| POLD1  | POLE | 1 | 0 | 34 | 0 | 3 | 1 Mutually_Exclusive | POLD1, POLE  | 0/4 |
| RANBP2 | POLE | 1 | 0 | 34 | 0 | 3 | 1 Mutually_Exclusive | POLE, RANBP2 | 0/4 |

|        |        |   |   |    |   |   |   |                    |                |     |
|--------|--------|---|---|----|---|---|---|--------------------|----------------|-----|
| RET    | POLE   | 1 | 0 | 34 | 0 | 3 | 1 | Mutually_Exclusive | POLE, RET      | 0/4 |
| RNF213 | POLE   | 1 | 0 | 34 | 0 | 3 | 1 | Mutually_Exclusive | POLE, RNF213   | 0/4 |
| SETD1B | POLE   | 1 | 0 | 34 | 0 | 3 | 1 | Mutually_Exclusive | POLE, SETD1B   | 0/4 |
| SPEN   | POLE   | 1 | 0 | 34 | 0 | 3 | 1 | Mutually_Exclusive | POLE, SPEN     | 0/4 |
| STAG1  | POLE   | 1 | 0 | 34 | 0 | 3 | 1 | Mutually_Exclusive | POLE, STAG1    | 0/4 |
| TERT   | POLE   | 1 | 0 | 34 | 0 | 3 | 1 | Mutually_Exclusive | POLE, TERT     | 0/4 |
| TNC    | POLE   | 1 | 0 | 34 | 0 | 3 | 1 | Mutually_Exclusive | POLE, TNC      | 0/4 |
| TPR    | POLE   | 1 | 0 | 34 | 0 | 3 | 1 | Mutually_Exclusive | POLE, TPR      | 0/4 |
| ZMYM3  | POLE   | 1 | 0 | 34 | 0 | 3 | 1 | Mutually_Exclusive | POLE, ZMYM3    | 0/4 |
| BRCA2  | ARID1B | 1 | 0 | 35 | 0 | 2 | 1 | Mutually_Exclusive | ARID1B, BRCA2  | 0/3 |
| COL1A1 | ARID1B | 1 | 0 | 35 | 0 | 2 | 1 | Mutually_Exclusive | ARID1B, COL1A1 | 0/3 |
| COL3A1 | ARID1B | 1 | 0 | 35 | 0 | 2 | 1 | Mutually_Exclusive | ARID1B, COL3A1 | 0/3 |
| DCC    | ARID1B | 1 | 0 | 35 | 0 | 2 | 1 | Mutually_Exclusive | ARID1B, DCC    | 0/3 |
| DROSHA | ARID1B | 1 | 0 | 35 | 0 | 2 | 1 | Mutually_Exclusive | ARID1B, DROSHA | 0/3 |
| FANCA  | ARID1B | 1 | 0 | 35 | 0 | 2 | 1 | Mutually_Exclusive | ARID1B, FANCA  | 0/3 |
| FLNA   | ARID1B | 1 | 0 | 35 | 0 | 2 | 1 | Mutually_Exclusive | ARID1B, FLNA   | 0/3 |
| N4BP2  | ARID1B | 1 | 0 | 35 | 0 | 2 | 1 | Mutually_Exclusive | ARID1B, N4BP2  | 0/3 |
| NCOR1  | ARID1B | 1 | 0 | 35 | 0 | 2 | 1 | Mutually_Exclusive | ARID1B, NCOR1  | 0/3 |

|        |        |   |   |    |   |   |   |                    |                |     |
|--------|--------|---|---|----|---|---|---|--------------------|----------------|-----|
| NF1    | ARID1B | 1 | 0 | 35 | 0 | 2 | 1 | Mutually_Exclusive | ARID1B, NF1    | 0/3 |
| NIN    | ARID1B | 1 | 0 | 35 | 0 | 2 | 1 | Mutually_Exclusive | ARID1B, NIN    | 0/3 |
| NSD1   | ARID1B | 1 | 0 | 35 | 0 | 2 | 1 | Mutually_Exclusive | ARID1B, NSD1   | 0/3 |
| POLD1  | ARID1B | 1 | 0 | 35 | 0 | 2 | 1 | Mutually_Exclusive | ARID1B, POLD1  | 0/3 |
| RET    | ARID1B | 1 | 0 | 35 | 0 | 2 | 1 | Mutually_Exclusive | ARID1B, RET    | 0/3 |
| RNF213 | ARID1B | 1 | 0 | 35 | 0 | 2 | 1 | Mutually_Exclusive | ARID1B, RNF213 | 0/3 |
| SETD1B | ARID1B | 1 | 0 | 35 | 0 | 2 | 1 | Mutually_Exclusive | ARID1B, SETD1B | 0/3 |
| SPEN   | ARID1B | 1 | 0 | 35 | 0 | 2 | 1 | Mutually_Exclusive | ARID1B, SPEN   | 0/3 |
| STAG1  | ARID1B | 1 | 0 | 35 | 0 | 2 | 1 | Mutually_Exclusive | ARID1B, STAG1  | 0/3 |
| TERT   | ARID1B | 1 | 0 | 35 | 0 | 2 | 1 | Mutually_Exclusive | ARID1B, TERT   | 0/3 |
| TNC    | ARID1B | 1 | 0 | 35 | 0 | 2 | 1 | Mutually_Exclusive | ARID1B, TNC    | 0/3 |
| TPR    | ARID1B | 1 | 0 | 35 | 0 | 2 | 1 | Mutually_Exclusive | ARID1B, TPR    | 0/3 |
| ZMYM3  | ARID1B | 1 | 0 | 35 | 0 | 2 | 1 | Mutually_Exclusive | ARID1B, ZMYM3  | 0/3 |
| BRCA2  | AXIN1  | 1 | 0 | 35 | 0 | 2 | 1 | Mutually_Exclusive | AXIN1, BRCA2   | 0/3 |
| COL1A1 | AXIN1  | 1 | 0 | 35 | 0 | 2 | 1 | Mutually_Exclusive | AXIN1, COL1A1  | 0/3 |
| COL3A1 | AXIN1  | 1 | 0 | 35 | 0 | 2 | 1 | Mutually_Exclusive | AXIN1, COL3A1  | 0/3 |
| DCC    | AXIN1  | 1 | 0 | 35 | 0 | 2 | 1 | Mutually_Exclusive | AXIN1, DCC     | 0/3 |
| DROSHA | AXIN1  | 1 | 0 | 35 | 0 | 2 | 1 | Mutually_Exclusive | AXIN1, DROSHA  | 0/3 |



|        |        |   |   |    |   |   |   |                    |               |     |
|--------|--------|---|---|----|---|---|---|--------------------|---------------|-----|
| FANCA  | AXIN1  | 1 | 0 | 35 | 0 | 2 | 1 | Mutually_Exclusive | AXIN1, FANCA  | 0/3 |
| FLNA   | AXIN1  | 1 | 0 | 35 | 0 | 2 | 1 | Mutually_Exclusive | AXIN1, FLNA   | 0/3 |
| KAT6A  | AXIN1  | 1 | 0 | 35 | 0 | 2 | 1 | Mutually_Exclusive | AXIN1, KAT6A  | 0/3 |
| KAT6B  | AXIN1  | 1 | 0 | 35 | 0 | 2 | 1 | Mutually_Exclusive | AXIN1, KAT6B  | 0/3 |
| N4BP2  | AXIN1  | 1 | 0 | 35 | 0 | 2 | 1 | Mutually_Exclusive | AXIN1, N4BP2  | 0/3 |
| NCOR1  | AXIN1  | 1 | 0 | 35 | 0 | 2 | 1 | Mutually_Exclusive | AXIN1, NCOR1  | 0/3 |
| NF1    | AXIN1  | 1 | 0 | 35 | 0 | 2 | 1 | Mutually_Exclusive | AXIN1, NF1    | 0/3 |
| NIN    | AXIN1  | 1 | 0 | 35 | 0 | 2 | 1 | Mutually_Exclusive | AXIN1, NIN    | 0/3 |
| POLD1  | AXIN1  | 1 | 0 | 35 | 0 | 2 | 1 | Mutually_Exclusive | AXIN1, POLD1  | 0/3 |
| RANBP2 | AXIN1  | 1 | 0 | 35 | 0 | 2 | 1 | Mutually_Exclusive | AXIN1, RANBP2 | 0/3 |
| RET    | AXIN1  | 1 | 0 | 35 | 0 | 2 | 1 | Mutually_Exclusive | AXIN1, RET    | 0/3 |
| RNF213 | AXIN1  | 1 | 0 | 35 | 0 | 2 | 1 | Mutually_Exclusive | AXIN1, RNF213 | 0/3 |
| SPEN   | AXIN1  | 1 | 0 | 35 | 0 | 2 | 1 | Mutually_Exclusive | AXIN1, SPEN   | 0/3 |
| STAG1  | AXIN1  | 1 | 0 | 35 | 0 | 2 | 1 | Mutually_Exclusive | AXIN1, STAG1  | 0/3 |
| TNC    | AXIN1  | 1 | 0 | 35 | 0 | 2 | 1 | Mutually_Exclusive | AXIN1, TNC    | 0/3 |
| TPR    | AXIN1  | 1 | 0 | 35 | 0 | 2 | 1 | Mutually_Exclusive | AXIN1, TPR    | 0/3 |
| ZMYM3  | AXIN1  | 1 | 0 | 35 | 0 | 2 | 1 | Mutually_Exclusive | AXIN1, ZMYM3  | 0/3 |
| BRCA2  | BCORL1 | 1 | 0 | 35 | 0 | 2 | 1 | Mutually_Exclusive | BCORL1, BRCA2 | 0/3 |

|        |        |   |   |    |   |   |   |                    |                |     |
|--------|--------|---|---|----|---|---|---|--------------------|----------------|-----|
| COL1A1 | BCORL1 | 1 | 0 | 35 | 0 | 2 | 1 | Mutually_Exclusive | BCORL1, COL1A1 | 0/3 |
| COL3A1 | BCORL1 | 1 | 0 | 35 | 0 | 2 | 1 | Mutually_Exclusive | BCORL1, COL3A1 | 0/3 |
| DCC    | BCORL1 | 1 | 0 | 35 | 0 | 2 | 1 | Mutually_Exclusive | BCORL1, DCC    | 0/3 |
| DROSHA | BCORL1 | 1 | 0 | 35 | 0 | 2 | 1 | Mutually_Exclusive | BCORL1, DROSHA | 0/3 |
| FANCA  | BCORL1 | 1 | 0 | 35 | 0 | 2 | 1 | Mutually_Exclusive | BCORL1, FANCA  | 0/3 |
| FLNA   | BCORL1 | 1 | 0 | 35 | 0 | 2 | 1 | Mutually_Exclusive | BCORL1, FLNA   | 0/3 |
| KAT6A  | BCORL1 | 1 | 0 | 35 | 0 | 2 | 1 | Mutually_Exclusive | BCORL1, KAT6A  | 0/3 |
| KAT6B  | BCORL1 | 1 | 0 | 35 | 0 | 2 | 1 | Mutually_Exclusive | BCORL1, KAT6B  | 0/3 |
| N4BP2  | BCORL1 | 1 | 0 | 35 | 0 | 2 | 1 | Mutually_Exclusive | BCORL1, N4BP2  | 0/3 |
| NCOR1  | BCORL1 | 1 | 0 | 35 | 0 | 2 | 1 | Mutually_Exclusive | BCORL1, NCOR1  | 0/3 |
| NF1    | BCORL1 | 1 | 0 | 35 | 0 | 2 | 1 | Mutually_Exclusive | BCORL1, NF1    | 0/3 |
| NIN    | BCORL1 | 1 | 0 | 35 | 0 | 2 | 1 | Mutually_Exclusive | BCORL1, NIN    | 0/3 |
| NSD1   | BCORL1 | 1 | 0 | 35 | 0 | 2 | 1 | Mutually_Exclusive | BCORL1, NSD1   | 0/3 |
| POLD1  | BCORL1 | 1 | 0 | 35 | 0 | 2 | 1 | Mutually_Exclusive | BCORL1, POLD1  | 0/3 |
| RANBP2 | BCORL1 | 1 | 0 | 35 | 0 | 2 | 1 | Mutually_Exclusive | BCORL1, RANBP2 | 0/3 |
| RET    | BCORL1 | 1 | 0 | 35 | 0 | 2 | 1 | Mutually_Exclusive | BCORL1, RET    | 0/3 |
| RNF213 | BCORL1 | 1 | 0 | 35 | 0 | 2 | 1 | Mutually_Exclusive | BCORL1, RNF213 | 0/3 |
| SETD1B | BCORL1 | 1 | 0 | 35 | 0 | 2 | 1 | Mutually_Exclusive | BCORL1, SETD1B | 0/3 |

|        |        |   |   |    |   |   |                          |               |     |
|--------|--------|---|---|----|---|---|--------------------------|---------------|-----|
| SPEN   | BCORL1 | 1 | 0 | 35 | 0 | 2 | 1 Mutually_Exclusi<br>ve | BCORL1, SPEN  | 0/3 |
| STAG1  | BCORL1 | 1 | 0 | 35 | 0 | 2 | 1 Mutually_Exclusi<br>ve | BCORL1, STAG1 | 0/3 |
| TERT   | BCORL1 | 1 | 0 | 35 | 0 | 2 | 1 Mutually_Exclusi<br>ve | BCORL1, TERT  | 0/3 |
| TNC    | BCORL1 | 1 | 0 | 35 | 0 | 2 | 1 Mutually_Exclusi<br>ve | BCORL1, TNC   | 0/3 |
| TPR    | BCORL1 | 1 | 0 | 35 | 0 | 2 | 1 Mutually_Exclusi<br>ve | BCORL1, TPR   | 0/3 |
| ZMYM3  | BCORL1 | 1 | 0 | 35 | 0 | 2 | 1 Mutually_Exclusi<br>ve | BCORL1, ZMYM3 | 0/3 |
| BRCA2  | BIRC6  | 1 | 0 | 35 | 0 | 2 | 1 Mutually_Exclusi<br>ve | BIRC6, BRCA2  | 0/3 |
| COL1A1 | BIRC6  | 1 | 0 | 35 | 0 | 2 | 1 Mutually_Exclusi<br>ve | BIRC6, COL1A1 | 0/3 |
| COL3A1 | BIRC6  | 1 | 0 | 35 | 0 | 2 | 1 Mutually_Exclusi<br>ve | BIRC6, COL3A1 | 0/3 |
| DCC    | BIRC6  | 1 | 0 | 35 | 0 | 2 | 1 Mutually_Exclusi<br>ve | BIRC6, DCC    | 0/3 |
| DROSHA | BIRC6  | 1 | 0 | 35 | 0 | 2 | 1 Mutually_Exclusi<br>ve | BIRC6, DROSHA | 0/3 |
| FANCA  | BIRC6  | 1 | 0 | 35 | 0 | 2 | 1 Mutually_Exclusi<br>ve | BIRC6, FANCA  | 0/3 |
| FLNA   | BIRC6  | 1 | 0 | 35 | 0 | 2 | 1 Mutually_Exclusi<br>ve | BIRC6, FLNA   | 0/3 |
| KAT6A  | BIRC6  | 1 | 0 | 35 | 0 | 2 | 1 Mutually_Exclusi<br>ve | BIRC6, KAT6A  | 0/3 |
| KAT6B  | BIRC6  | 1 | 0 | 35 | 0 | 2 | 1 Mutually_Exclusi<br>ve | BIRC6, KAT6B  | 0/3 |
| N4BP2  | BIRC6  | 1 | 0 | 35 | 0 | 2 | 1 Mutually_Exclusi<br>ve | BIRC6, N4BP2  | 0/3 |
| NCOR1  | BIRC6  | 1 | 0 | 35 | 0 | 2 | 1 Mutually_Exclusi<br>ve | BIRC6, NCOR1  | 0/3 |
| NF1    | BIRC6  | 1 | 0 | 35 | 0 | 2 | 1 Mutually_Exclusi<br>ve | BIRC6, NF1    | 0/3 |

|        |       |   |   |    |   |   |                      |               |     |
|--------|-------|---|---|----|---|---|----------------------|---------------|-----|
| NIN    | BIRC6 | 1 | 0 | 35 | 0 | 2 | 1 Mutually_Exclusive | BIRC6, NIN    | 0/3 |
| NSD1   | BIRC6 | 1 | 0 | 35 | 0 | 2 | 1 Mutually_Exclusive | BIRC6, NSD1   | 0/3 |
| POLD1  | BIRC6 | 1 | 0 | 35 | 0 | 2 | 1 Mutually_Exclusive | BIRC6, POLD1  | 0/3 |
| RANBP2 | BIRC6 | 1 | 0 | 35 | 0 | 2 | 1 Mutually_Exclusive | BIRC6, RANBP2 | 0/3 |
| RET    | BIRC6 | 1 | 0 | 35 | 0 | 2 | 1 Mutually_Exclusive | BIRC6, RET    | 0/3 |
| RNF213 | BIRC6 | 1 | 0 | 35 | 0 | 2 | 1 Mutually_Exclusive | BIRC6, RNF213 | 0/3 |
| SETD1B | BIRC6 | 1 | 0 | 35 | 0 | 2 | 1 Mutually_Exclusive | BIRC6, SETD1B | 0/3 |
| SPEN   | BIRC6 | 1 | 0 | 35 | 0 | 2 | 1 Mutually_Exclusive | BIRC6, SPEN   | 0/3 |
| STAG1  | BIRC6 | 1 | 0 | 35 | 0 | 2 | 1 Mutually_Exclusive | BIRC6, STAG1  | 0/3 |
| TERT   | BIRC6 | 1 | 0 | 35 | 0 | 2 | 1 Mutually_Exclusive | BIRC6, TERT   | 0/3 |
| TNC    | BIRC6 | 1 | 0 | 35 | 0 | 2 | 1 Mutually_Exclusive | BIRC6, TNC    | 0/3 |
| TPR    | BIRC6 | 1 | 0 | 35 | 0 | 2 | 1 Mutually_Exclusive | BIRC6, TPR    | 0/3 |
| ZMYM3  | BIRC6 | 1 | 0 | 35 | 0 | 2 | 1 Mutually_Exclusive | BIRC6, ZMYM3  | 0/3 |
| BRCA2  | DNMT1 | 1 | 0 | 35 | 0 | 2 | 1 Mutually_Exclusive | BRCA2, DNMT1  | 0/3 |
| COL1A1 | DNMT1 | 1 | 0 | 35 | 0 | 2 | 1 Mutually_Exclusive | COL1A1, DNMT1 | 0/3 |
| COL3A1 | DNMT1 | 1 | 0 | 35 | 0 | 2 | 1 Mutually_Exclusive | COL3A1, DNMT1 | 0/3 |
| DCC    | DNMT1 | 1 | 0 | 35 | 0 | 2 | 1 Mutually_Exclusive | DCC, DNMT1    | 0/3 |
| DROSHA | DNMT1 | 1 | 0 | 35 | 0 | 2 | 1 Mutually_Exclusive | DNMT1, DROSHA | 0/3 |

|        |       |   |   |    |   |   |   |                    |               |     |
|--------|-------|---|---|----|---|---|---|--------------------|---------------|-----|
| FANCA  | DNMT1 | 1 | 0 | 35 | 0 | 2 | 1 | Mutually_Exclusive | DNMT1, FANCA  | 0/3 |
| FLNA   | DNMT1 | 1 | 0 | 35 | 0 | 2 | 1 | Mutually_Exclusive | DNMT1, FLNA   | 0/3 |
| KAT6A  | DNMT1 | 1 | 0 | 35 | 0 | 2 | 1 | Mutually_Exclusive | DNMT1, KAT6A  | 0/3 |
| KAT6B  | DNMT1 | 1 | 0 | 35 | 0 | 2 | 1 | Mutually_Exclusive | DNMT1, KAT6B  | 0/3 |
| NCOR1  | DNMT1 | 1 | 0 | 35 | 0 | 2 | 1 | Mutually_Exclusive | DNMT1, NCOR1  | 0/3 |
| NF1    | DNMT1 | 1 | 0 | 35 | 0 | 2 | 1 | Mutually_Exclusive | DNMT1, NF1    | 0/3 |
| NIN    | DNMT1 | 1 | 0 | 35 | 0 | 2 | 1 | Mutually_Exclusive | DNMT1, NIN    | 0/3 |
| NSD1   | DNMT1 | 1 | 0 | 35 | 0 | 2 | 1 | Mutually_Exclusive | DNMT1, NSD1   | 0/3 |
| POLD1  | DNMT1 | 1 | 0 | 35 | 0 | 2 | 1 | Mutually_Exclusive | DNMT1, POLD1  | 0/3 |
| RANBP2 | DNMT1 | 1 | 0 | 35 | 0 | 2 | 1 | Mutually_Exclusive | DNMT1, RANBP2 | 0/3 |
| RET    | DNMT1 | 1 | 0 | 35 | 0 | 2 | 1 | Mutually_Exclusive | DNMT1, RET    | 0/3 |
| RNF213 | DNMT1 | 1 | 0 | 35 | 0 | 2 | 1 | Mutually_Exclusive | DNMT1, RNF213 | 0/3 |
| SETD1B | DNMT1 | 1 | 0 | 35 | 0 | 2 | 1 | Mutually_Exclusive | DNMT1, SETD1B | 0/3 |
| SPEN   | DNMT1 | 1 | 0 | 35 | 0 | 2 | 1 | Mutually_Exclusive | DNMT1, SPEN   | 0/3 |
| STAG1  | DNMT1 | 1 | 0 | 35 | 0 | 2 | 1 | Mutually_Exclusive | DNMT1, STAG1  | 0/3 |
| TERT   | DNMT1 | 1 | 0 | 35 | 0 | 2 | 1 | Mutually_Exclusive | DNMT1, TERT   | 0/3 |
| TNC    | DNMT1 | 1 | 0 | 35 | 0 | 2 | 1 | Mutually_Exclusive | DNMT1, TNC    | 0/3 |
| TPR    | DNMT1 | 1 | 0 | 35 | 0 | 2 | 1 | Mutually_Exclusive | DNMT1, TPR    | 0/3 |

|        |       |   |   |    |   |   |   |                    |              |     |
|--------|-------|---|---|----|---|---|---|--------------------|--------------|-----|
| ZMYM3  | DNMT1 | 1 | 0 | 35 | 0 | 2 | 1 | Mutually_Exclusive | DNMT1, ZMYM3 | 0/3 |
| BRCA2  | MTOR  | 1 | 0 | 35 | 0 | 2 | 1 | Mutually_Exclusive | BRCA2, MTOR  | 0/3 |
| COL1A1 | MTOR  | 1 | 0 | 35 | 0 | 2 | 1 | Mutually_Exclusive | COL1A1, MTOR | 0/3 |
| COL3A1 | MTOR  | 1 | 0 | 35 | 0 | 2 | 1 | Mutually_Exclusive | COL3A1, MTOR | 0/3 |
| DCC    | MTOR  | 1 | 0 | 35 | 0 | 2 | 1 | Mutually_Exclusive | DCC, MTOR    | 0/3 |
| DROSHA | MTOR  | 1 | 0 | 35 | 0 | 2 | 1 | Mutually_Exclusive | DROSHA, MTOR | 0/3 |
| FANCA  | MTOR  | 1 | 0 | 35 | 0 | 2 | 1 | Mutually_Exclusive | FANCA, MTOR  | 0/3 |
| FLNA   | MTOR  | 1 | 0 | 35 | 0 | 2 | 1 | Mutually_Exclusive | FLNA, MTOR   | 0/3 |
| KAT6B  | MTOR  | 1 | 0 | 35 | 0 | 2 | 1 | Mutually_Exclusive | KAT6B, MTOR  | 0/3 |
| N4BP2  | MTOR  | 1 | 0 | 35 | 0 | 2 | 1 | Mutually_Exclusive | MTOR, N4BP2  | 0/3 |
| NCOR1  | MTOR  | 1 | 0 | 35 | 0 | 2 | 1 | Mutually_Exclusive | MTOR, NCOR1  | 0/3 |
| NF1    | MTOR  | 1 | 0 | 35 | 0 | 2 | 1 | Mutually_Exclusive | MTOR, NF1    | 0/3 |
| NIN    | MTOR  | 1 | 0 | 35 | 0 | 2 | 1 | Mutually_Exclusive | MTOR, NIN    | 0/3 |
| NSD1   | MTOR  | 1 | 0 | 35 | 0 | 2 | 1 | Mutually_Exclusive | MTOR, NSD1   | 0/3 |
| POLD1  | MTOR  | 1 | 0 | 35 | 0 | 2 | 1 | Mutually_Exclusive | MTOR, POLD1  | 0/3 |
| RANBP2 | MTOR  | 1 | 0 | 35 | 0 | 2 | 1 | Mutually_Exclusive | MTOR, RANBP2 | 0/3 |
| RET    | MTOR  | 1 | 0 | 35 | 0 | 2 | 1 | Mutually_Exclusive | MTOR, RET    | 0/3 |
| RNF213 | MTOR  | 1 | 0 | 35 | 0 | 2 | 1 | Mutually_Exclusive | MTOR, RNF213 | 0/3 |

|        |      |   |   |    |   |   |   |                    |              |     |
|--------|------|---|---|----|---|---|---|--------------------|--------------|-----|
| SETD1B | MTOR | 1 | 0 | 35 | 0 | 2 | 1 | Mutually_Exclusive | MTOR, SETD1B | 0/3 |
| SPEN   | MTOR | 1 | 0 | 35 | 0 | 2 | 1 | Mutually_Exclusive | MTOR, SPEN   | 0/3 |
| STAG1  | MTOR | 1 | 0 | 35 | 0 | 2 | 1 | Mutually_Exclusive | MTOR, STAG1  | 0/3 |
| TERT   | MTOR | 1 | 0 | 35 | 0 | 2 | 1 | Mutually_Exclusive | MTOR, TERT   | 0/3 |
| TNC    | MTOR | 1 | 0 | 35 | 0 | 2 | 1 | Mutually_Exclusive | MTOR, TNC    | 0/3 |
| TPR    | MTOR | 1 | 0 | 35 | 0 | 2 | 1 | Mutually_Exclusive | MTOR, TPR    | 0/3 |
| ZMYM3  | MTOR | 1 | 0 | 35 | 0 | 2 | 1 | Mutually_Exclusive | MTOR, ZMYM3  | 0/3 |
| BRCA2  | MYH9 | 1 | 0 | 35 | 0 | 2 | 1 | Mutually_Exclusive | BRCA2, MYH9  | 0/3 |
| COL1A1 | MYH9 | 1 | 0 | 35 | 0 | 2 | 1 | Mutually_Exclusive | COL1A1, MYH9 | 0/3 |
| COL3A1 | MYH9 | 1 | 0 | 35 | 0 | 2 | 1 | Mutually_Exclusive | COL3A1, MYH9 | 0/3 |
| DCC    | MYH9 | 1 | 0 | 35 | 0 | 2 | 1 | Mutually_Exclusive | DCC, MYH9    | 0/3 |
| DROSHA | MYH9 | 1 | 0 | 35 | 0 | 2 | 1 | Mutually_Exclusive | DROSHA, MYH9 | 0/3 |
| FANCA  | MYH9 | 1 | 0 | 35 | 0 | 2 | 1 | Mutually_Exclusive | FANCA, MYH9  | 0/3 |
| FLNA   | MYH9 | 1 | 0 | 35 | 0 | 2 | 1 | Mutually_Exclusive | FLNA, MYH9   | 0/3 |
| KAT6A  | MYH9 | 1 | 0 | 35 | 0 | 2 | 1 | Mutually_Exclusive | KAT6A, MYH9  | 0/3 |
| KAT6B  | MYH9 | 1 | 0 | 35 | 0 | 2 | 1 | Mutually_Exclusive | KAT6B, MYH9  | 0/3 |
| N4BP2  | MYH9 | 1 | 0 | 35 | 0 | 2 | 1 | Mutually_Exclusive | MYH9, N4BP2  | 0/3 |
| NCOR1  | MYH9 | 1 | 0 | 35 | 0 | 2 | 1 | Mutually_Exclusive | MYH9, NCOR1  | 0/3 |

|        |       |   |   |    |   |   |                      |               |     |
|--------|-------|---|---|----|---|---|----------------------|---------------|-----|
| NF1    | MYH9  | 1 | 0 | 35 | 0 | 2 | 1 Mutually_Exclusive | MYH9, NF1     | 0/3 |
| NIN    | MYH9  | 1 | 0 | 35 | 0 | 2 | 1 Mutually_Exclusive | MYH9, NIN     | 0/3 |
| NSD1   | MYH9  | 1 | 0 | 35 | 0 | 2 | 1 Mutually_Exclusive | MYH9, NSD1    | 0/3 |
| POLD1  | MYH9  | 1 | 0 | 35 | 0 | 2 | 1 Mutually_Exclusive | MYH9, POLD1   | 0/3 |
| RANBP2 | MYH9  | 1 | 0 | 35 | 0 | 2 | 1 Mutually_Exclusive | MYH9, RANBP2  | 0/3 |
| RET    | MYH9  | 1 | 0 | 35 | 0 | 2 | 1 Mutually_Exclusive | MYH9, RET     | 0/3 |
| RNF213 | MYH9  | 1 | 0 | 35 | 0 | 2 | 1 Mutually_Exclusive | MYH9, RNF213  | 0/3 |
| SETD1B | MYH9  | 1 | 0 | 35 | 0 | 2 | 1 Mutually_Exclusive | MYH9, SETD1B  | 0/3 |
| SPEN   | MYH9  | 1 | 0 | 35 | 0 | 2 | 1 Mutually_Exclusive | MYH9, SPEN    | 0/3 |
| STAG1  | MYH9  | 1 | 0 | 35 | 0 | 2 | 1 Mutually_Exclusive | MYH9, STAG1   | 0/3 |
| TERT   | MYH9  | 1 | 0 | 35 | 0 | 2 | 1 Mutually_Exclusive | MYH9, TERT    | 0/3 |
| TNC    | MYH9  | 1 | 0 | 35 | 0 | 2 | 1 Mutually_Exclusive | MYH9, TNC     | 0/3 |
| TPR    | MYH9  | 1 | 0 | 35 | 0 | 2 | 1 Mutually_Exclusive | MYH9, TPR     | 0/3 |
| ZMYM3  | MYH9  | 1 | 0 | 35 | 0 | 2 | 1 Mutually_Exclusive | MYH9, ZMYM3   | 0/3 |
| BRCA2  | NCOR2 | 1 | 0 | 35 | 0 | 2 | 1 Mutually_Exclusive | BRCA2, NCOR2  | 0/3 |
| COL1A1 | NCOR2 | 1 | 0 | 35 | 0 | 2 | 1 Mutually_Exclusive | COL1A1, NCOR2 | 0/3 |
| DCC    | NCOR2 | 1 | 0 | 35 | 0 | 2 | 1 Mutually_Exclusive | DCC, NCOR2    | 0/3 |
| DROSHA | NCOR2 | 1 | 0 | 35 | 0 | 2 | 1 Mutually_Exclusive | DROSHA, NCOR2 | 0/3 |



|        |       |   |   |    |   |   |   |                    |               |     |
|--------|-------|---|---|----|---|---|---|--------------------|---------------|-----|
| FANCA  | NCOR2 | 1 | 0 | 35 | 0 | 2 | 1 | Mutually_Exclusive | FANCA, NCOR2  | 0/3 |
| FLNA   | NCOR2 | 1 | 0 | 35 | 0 | 2 | 1 | Mutually_Exclusive | FLNA, NCOR2   | 0/3 |
| KAT6A  | NCOR2 | 1 | 0 | 35 | 0 | 2 | 1 | Mutually_Exclusive | KAT6A, NCOR2  | 0/3 |
| KAT6B  | NCOR2 | 1 | 0 | 35 | 0 | 2 | 1 | Mutually_Exclusive | KAT6B, NCOR2  | 0/3 |
| N4BP2  | NCOR2 | 1 | 0 | 35 | 0 | 2 | 1 | Mutually_Exclusive | N4BP2, NCOR2  | 0/3 |
| NCOR1  | NCOR2 | 1 | 0 | 35 | 0 | 2 | 1 | Mutually_Exclusive | NCOR1, NCOR2  | 0/3 |
| NF1    | NCOR2 | 1 | 0 | 35 | 0 | 2 | 1 | Mutually_Exclusive | NCOR2, NF1    | 0/3 |
| NIN    | NCOR2 | 1 | 0 | 35 | 0 | 2 | 1 | Mutually_Exclusive | NCOR2, NIN    | 0/3 |
| NSD1   | NCOR2 | 1 | 0 | 35 | 0 | 2 | 1 | Mutually_Exclusive | NCOR2, NSD1   | 0/3 |
| POLD1  | NCOR2 | 1 | 0 | 35 | 0 | 2 | 1 | Mutually_Exclusive | NCOR2, POLD1  | 0/3 |
| RANBP2 | NCOR2 | 1 | 0 | 35 | 0 | 2 | 1 | Mutually_Exclusive | NCOR2, RANBP2 | 0/3 |
| RET    | NCOR2 | 1 | 0 | 35 | 0 | 2 | 1 | Mutually_Exclusive | NCOR2, RET    | 0/3 |
| SETD1B | NCOR2 | 1 | 0 | 35 | 0 | 2 | 1 | Mutually_Exclusive | NCOR2, SETD1B | 0/3 |
| SPEN   | NCOR2 | 1 | 0 | 35 | 0 | 2 | 1 | Mutually_Exclusive | NCOR2, SPEN   | 0/3 |
| STAG1  | NCOR2 | 1 | 0 | 35 | 0 | 2 | 1 | Mutually_Exclusive | NCOR2, STAG1  | 0/3 |
| TERT   | NCOR2 | 1 | 0 | 35 | 0 | 2 | 1 | Mutually_Exclusive | NCOR2, TERT   | 0/3 |
| TNC    | NCOR2 | 1 | 0 | 35 | 0 | 2 | 1 | Mutually_Exclusive | NCOR2, TNC    | 0/3 |
| TPR    | NCOR2 | 1 | 0 | 35 | 0 | 2 | 1 | Mutually_Exclusive | NCOR2, TPR    | 0/3 |

|        |         |   |   |    |   |   |                      |                 |     |
|--------|---------|---|---|----|---|---|----------------------|-----------------|-----|
| ZMYM3  | NCOR2   | 1 | 0 | 35 | 0 | 2 | 1 Mutually_Exclusive | NCOR2, ZMYM3    | 0/3 |
| BRCA2  | SMARCA4 | 1 | 0 | 35 | 0 | 2 | 1 Mutually_Exclusive | BRCA2, SMARCA4  | 0/3 |
| COL1A1 | SMARCA4 | 1 | 0 | 35 | 0 | 2 | 1 Mutually_Exclusive | COL1A1, SMARCA4 | 0/3 |
| COL3A1 | SMARCA4 | 1 | 0 | 35 | 0 | 2 | 1 Mutually_Exclusive | COL3A1, SMARCA4 | 0/3 |
| DCC    | SMARCA4 | 1 | 0 | 35 | 0 | 2 | 1 Mutually_Exclusive | DCC, SMARCA4    | 0/3 |
| DROSHA | SMARCA4 | 1 | 0 | 35 | 0 | 2 | 1 Mutually_Exclusive | DROSHA, SMARCA4 | 0/3 |
| FANCA  | SMARCA4 | 1 | 0 | 35 | 0 | 2 | 1 Mutually_Exclusive | FANCA, SMARCA4  | 0/3 |
| FLNA   | SMARCA4 | 1 | 0 | 35 | 0 | 2 | 1 Mutually_Exclusive | FLNA, SMARCA4   | 0/3 |
| KAT6A  | SMARCA4 | 1 | 0 | 35 | 0 | 2 | 1 Mutually_Exclusive | KAT6A, SMARCA4  | 0/3 |
| KAT6B  | SMARCA4 | 1 | 0 | 35 | 0 | 2 | 1 Mutually_Exclusive | KAT6B, SMARCA4  | 0/3 |
| N4BP2  | SMARCA4 | 1 | 0 | 35 | 0 | 2 | 1 Mutually_Exclusive | N4BP2, SMARCA4  | 0/3 |
| NCOR1  | SMARCA4 | 1 | 0 | 35 | 0 | 2 | 1 Mutually_Exclusive | NCOR1, SMARCA4  | 0/3 |
| NF1    | SMARCA4 | 1 | 0 | 35 | 0 | 2 | 1 Mutually_Exclusive | NF1, SMARCA4    | 0/3 |
| NIN    | SMARCA4 | 1 | 0 | 35 | 0 | 2 | 1 Mutually_Exclusive | NIN, SMARCA4    | 0/3 |
| NSD1   | SMARCA4 | 1 | 0 | 35 | 0 | 2 | 1 Mutually_Exclusive | NSD1, SMARCA4   | 0/3 |
| POLD1  | SMARCA4 | 1 | 0 | 35 | 0 | 2 | 1 Mutually_Exclusive | POLD1, SMARCA4  | 0/3 |
| RANBP2 | SMARCA4 | 1 | 0 | 35 | 0 | 2 | 1 Mutually_Exclusive | RANBP2, SMARCA4 | 0/3 |
| RET    | SMARCA4 | 1 | 0 | 35 | 0 | 2 | 1 Mutually_Exclusive | RET, SMARCA4    | 0/3 |

|        |         |   |   |    |   |   |                      |                 |     |
|--------|---------|---|---|----|---|---|----------------------|-----------------|-----|
| RNF213 | SMARCA4 | 1 | 0 | 35 | 0 | 2 | 1 Mutually_Exclusive | RNF213, SMARCA4 | 0/3 |
| SETD1B | SMARCA4 | 1 | 0 | 35 | 0 | 2 | 1 Mutually_Exclusive | SETD1B, SMARCA4 | 0/3 |
| SPEN   | SMARCA4 | 1 | 0 | 35 | 0 | 2 | 1 Mutually_Exclusive | SMARCA4, SPEN   | 0/3 |
| STAG1  | SMARCA4 | 1 | 0 | 35 | 0 | 2 | 1 Mutually_Exclusive | SMARCA4, STAG1  | 0/3 |
| TERT   | SMARCA4 | 1 | 0 | 35 | 0 | 2 | 1 Mutually_Exclusive | SMARCA4, TERT   | 0/3 |
| TNC    | SMARCA4 | 1 | 0 | 35 | 0 | 2 | 1 Mutually_Exclusive | SMARCA4, TNC    | 0/3 |
| TPR    | SMARCA4 | 1 | 0 | 35 | 0 | 2 | 1 Mutually_Exclusive | SMARCA4, TPR    | 0/3 |
| ZMYM3  | SMARCA4 | 1 | 0 | 35 | 0 | 2 | 1 Mutually_Exclusive | SMARCA4, ZMYM3  | 0/3 |
| BRCA2  | TRRAP   | 1 | 0 | 35 | 0 | 2 | 1 Mutually_Exclusive | BRCA2, TRRAP    | 0/3 |
| COL1A1 | TRRAP   | 1 | 0 | 35 | 0 | 2 | 1 Mutually_Exclusive | COL1A1, TRRAP   | 0/3 |
| COL3A1 | TRRAP   | 1 | 0 | 35 | 0 | 2 | 1 Mutually_Exclusive | COL3A1, TRRAP   | 0/3 |
| DCC    | TRRAP   | 1 | 0 | 35 | 0 | 2 | 1 Mutually_Exclusive | DCC, TRRAP      | 0/3 |
| DROSHA | TRRAP   | 1 | 0 | 35 | 0 | 2 | 1 Mutually_Exclusive | DROSHA, TRRAP   | 0/3 |
| FANCA  | TRRAP   | 1 | 0 | 35 | 0 | 2 | 1 Mutually_Exclusive | FANCA, TRRAP    | 0/3 |
| FLNA   | TRRAP   | 1 | 0 | 35 | 0 | 2 | 1 Mutually_Exclusive | FLNA, TRRAP     | 0/3 |
| KAT6A  | TRRAP   | 1 | 0 | 35 | 0 | 2 | 1 Mutually_Exclusive | KAT6A, TRRAP    | 0/3 |
| KAT6B  | TRRAP   | 1 | 0 | 35 | 0 | 2 | 1 Mutually_Exclusive | KAT6B, TRRAP    | 0/3 |
| N4BP2  | TRRAP   | 1 | 0 | 35 | 0 | 2 | 1 Mutually_Exclusive | N4BP2, TRRAP    | 0/3 |

|        |       |   |   |    |   |   |                      |               |     |
|--------|-------|---|---|----|---|---|----------------------|---------------|-----|
| NCOR1  | TRRAP | 1 | 0 | 35 | 0 | 2 | 1 Mutually_Exclusive | NCOR1, TRRAP  | 0/3 |
| NF1    | TRRAP | 1 | 0 | 35 | 0 | 2 | 1 Mutually_Exclusive | NF1, TRRAP    | 0/3 |
| NIN    | TRRAP | 1 | 0 | 35 | 0 | 2 | 1 Mutually_Exclusive | NIN, TRRAP    | 0/3 |
| NSD1   | TRRAP | 1 | 0 | 35 | 0 | 2 | 1 Mutually_Exclusive | NSD1, TRRAP   | 0/3 |
| POLD1  | TRRAP | 1 | 0 | 35 | 0 | 2 | 1 Mutually_Exclusive | POLD1, TRRAP  | 0/3 |
| RANBP2 | TRRAP | 1 | 0 | 35 | 0 | 2 | 1 Mutually_Exclusive | RANBP2, TRRAP | 0/3 |
| RNF213 | TRRAP | 1 | 0 | 35 | 0 | 2 | 1 Mutually_Exclusive | RNF213, TRRAP | 0/3 |
| SETD1B | TRRAP | 1 | 0 | 35 | 0 | 2 | 1 Mutually_Exclusive | SETD1B, TRRAP | 0/3 |
| SPEN   | TRRAP | 1 | 0 | 35 | 0 | 2 | 1 Mutually_Exclusive | SPEN, TRRAP   | 0/3 |
| STAG1  | TRRAP | 1 | 0 | 35 | 0 | 2 | 1 Mutually_Exclusive | STAG1, TRRAP  | 0/3 |
| TERT   | TRRAP | 1 | 0 | 35 | 0 | 2 | 1 Mutually_Exclusive | TERT, TRRAP   | 0/3 |
| TNC    | TRRAP | 1 | 0 | 35 | 0 | 2 | 1 Mutually_Exclusive | TNC, TRRAP    | 0/3 |
| TPR    | TRRAP | 1 | 0 | 35 | 0 | 2 | 1 Mutually_Exclusive | TPR, TRRAP    | 0/3 |
| ZMYM3  | TRRAP | 1 | 0 | 35 | 0 | 2 | 1 Mutually_Exclusive | TRRAP, ZMYM3  | 0/3 |
| BRCA2  | TSC2  | 1 | 0 | 35 | 0 | 2 | 1 Mutually_Exclusive | BRCA2, TSC2   | 0/3 |
| COL3A1 | TSC2  | 1 | 0 | 35 | 0 | 2 | 1 Mutually_Exclusive | COL3A1, TSC2  | 0/3 |
| DCC    | TSC2  | 1 | 0 | 35 | 0 | 2 | 1 Mutually_Exclusive | DCC, TSC2     | 0/3 |
| DROSHA | TSC2  | 1 | 0 | 35 | 0 | 2 | 1 Mutually_Exclusive | DROSHA, TSC2  | 0/3 |

|        |      |   |   |    |   |   |                      |              |     |
|--------|------|---|---|----|---|---|----------------------|--------------|-----|
| FANCA  | TSC2 | 1 | 0 | 35 | 0 | 2 | 1 Mutually_Exclusive | FANCA, TSC2  | 0/3 |
| FLNA   | TSC2 | 1 | 0 | 35 | 0 | 2 | 1 Mutually_Exclusive | FLNA, TSC2   | 0/3 |
| KAT6A  | TSC2 | 1 | 0 | 35 | 0 | 2 | 1 Mutually_Exclusive | KAT6A, TSC2  | 0/3 |
| KAT6B  | TSC2 | 1 | 0 | 35 | 0 | 2 | 1 Mutually_Exclusive | KAT6B, TSC2  | 0/3 |
| N4BP2  | TSC2 | 1 | 0 | 35 | 0 | 2 | 1 Mutually_Exclusive | N4BP2, TSC2  | 0/3 |
| NCOR1  | TSC2 | 1 | 0 | 35 | 0 | 2 | 1 Mutually_Exclusive | NCOR1, TSC2  | 0/3 |
| NF1    | TSC2 | 1 | 0 | 35 | 0 | 2 | 1 Mutually_Exclusive | NF1, TSC2    | 0/3 |
| NIN    | TSC2 | 1 | 0 | 35 | 0 | 2 | 1 Mutually_Exclusive | NIN, TSC2    | 0/3 |
| NSD1   | TSC2 | 1 | 0 | 35 | 0 | 2 | 1 Mutually_Exclusive | NSD1, TSC2   | 0/3 |
| POLD1  | TSC2 | 1 | 0 | 35 | 0 | 2 | 1 Mutually_Exclusive | POLD1, TSC2  | 0/3 |
| RANBP2 | TSC2 | 1 | 0 | 35 | 0 | 2 | 1 Mutually_Exclusive | RANBP2, TSC2 | 0/3 |
| RET    | TSC2 | 1 | 0 | 35 | 0 | 2 | 1 Mutually_Exclusive | RET, TSC2    | 0/3 |
| RNF213 | TSC2 | 1 | 0 | 35 | 0 | 2 | 1 Mutually_Exclusive | RNF213, TSC2 | 0/3 |
| SETD1B | TSC2 | 1 | 0 | 35 | 0 | 2 | 1 Mutually_Exclusive | SETD1B, TSC2 | 0/3 |
| SPEN   | TSC2 | 1 | 0 | 35 | 0 | 2 | 1 Mutually_Exclusive | SPEN, TSC2   | 0/3 |
| STAG1  | TSC2 | 1 | 0 | 35 | 0 | 2 | 1 Mutually_Exclusive | STAG1, TSC2  | 0/3 |
| TERT   | TSC2 | 1 | 0 | 35 | 0 | 2 | 1 Mutually_Exclusive | TERT, TSC2   | 0/3 |
| TNC    | TSC2 | 1 | 0 | 35 | 0 | 2 | 1 Mutually_Exclusive | TNC, TSC2    | 0/3 |

|        |      |   |   |    |   |   |   |                    |              |     |
|--------|------|---|---|----|---|---|---|--------------------|--------------|-----|
| TPR    | TSC2 | 1 | 0 | 35 | 0 | 2 | 1 | Mutually_Exclusive | TPR, TSC2    | 0/3 |
| ZMYM3  | TSC2 | 1 | 0 | 35 | 0 | 2 | 1 | Mutually_Exclusive | TSC2, ZMYM3  | 0/3 |
| BRCA2  | UBR5 | 1 | 0 | 35 | 0 | 2 | 1 | Mutually_Exclusive | BRCA2, UBR5  | 0/3 |
| COL1A1 | UBR5 | 1 | 0 | 35 | 0 | 2 | 1 | Mutually_Exclusive | COL1A1, UBR5 | 0/3 |
| COL3A1 | UBR5 | 1 | 0 | 35 | 0 | 2 | 1 | Mutually_Exclusive | COL3A1, UBR5 | 0/3 |
| DCC    | UBR5 | 1 | 0 | 35 | 0 | 2 | 1 | Mutually_Exclusive | DCC, UBR5    | 0/3 |
| DROSHA | UBR5 | 1 | 0 | 35 | 0 | 2 | 1 | Mutually_Exclusive | DROSHA, UBR5 | 0/3 |
| FANCA  | UBR5 | 1 | 0 | 35 | 0 | 2 | 1 | Mutually_Exclusive | FANCA, UBR5  | 0/3 |
| FLNA   | UBR5 | 1 | 0 | 35 | 0 | 2 | 1 | Mutually_Exclusive | FLNA, UBR5   | 0/3 |
| KAT6A  | UBR5 | 1 | 0 | 35 | 0 | 2 | 1 | Mutually_Exclusive | KAT6A, UBR5  | 0/3 |
| KAT6B  | UBR5 | 1 | 0 | 35 | 0 | 2 | 1 | Mutually_Exclusive | KAT6B, UBR5  | 0/3 |
| N4BP2  | UBR5 | 1 | 0 | 35 | 0 | 2 | 1 | Mutually_Exclusive | N4BP2, UBR5  | 0/3 |
| NCOR1  | UBR5 | 1 | 0 | 35 | 0 | 2 | 1 | Mutually_Exclusive | NCOR1, UBR5  | 0/3 |
| NF1    | UBR5 | 1 | 0 | 35 | 0 | 2 | 1 | Mutually_Exclusive | NF1, UBR5    | 0/3 |
| NIN    | UBR5 | 1 | 0 | 35 | 0 | 2 | 1 | Mutually_Exclusive | NIN, UBR5    | 0/3 |
| NSD1   | UBR5 | 1 | 0 | 35 | 0 | 2 | 1 | Mutually_Exclusive | NSD1, UBR5   | 0/3 |
| POLD1  | UBR5 | 1 | 0 | 35 | 0 | 2 | 1 | Mutually_Exclusive | POLD1, UBR5  | 0/3 |
| RANBP2 | UBR5 | 1 | 0 | 35 | 0 | 2 | 1 | Mutually_Exclusive | RANBP2, UBR5 | 0/3 |

|        |       |   |   |    |   |   |   |                    |               |     |
|--------|-------|---|---|----|---|---|---|--------------------|---------------|-----|
| RET    | UBR5  | 1 | 0 | 35 | 0 | 2 | 1 | Mutually_Exclusive | RET, UBR5     | 0/3 |
| RNF213 | UBR5  | 1 | 0 | 35 | 0 | 2 | 1 | Mutually_Exclusive | RNF213, UBR5  | 0/3 |
| SETD1B | UBR5  | 1 | 0 | 35 | 0 | 2 | 1 | Mutually_Exclusive | SETD1B, UBR5  | 0/3 |
| STAG1  | UBR5  | 1 | 0 | 35 | 0 | 2 | 1 | Mutually_Exclusive | STAG1, UBR5   | 0/3 |
| TERT   | UBR5  | 1 | 0 | 35 | 0 | 2 | 1 | Mutually_Exclusive | TERT, UBR5    | 0/3 |
| TNC    | UBR5  | 1 | 0 | 35 | 0 | 2 | 1 | Mutually_Exclusive | TNC, UBR5     | 0/3 |
| TPR    | UBR5  | 1 | 0 | 35 | 0 | 2 | 1 | Mutually_Exclusive | TPR, UBR5     | 0/3 |
| ZMYM3  | UBR5  | 1 | 0 | 35 | 0 | 2 | 1 | Mutually_Exclusive | UBR5, ZMYM3   | 0/3 |
| COL1A1 | BRCA2 | 1 | 0 | 36 | 0 | 1 | 1 | Mutually_Exclusive | BRCA2, COL1A1 | 0/2 |
| COL3A1 | BRCA2 | 1 | 0 | 36 | 0 | 1 | 1 | Mutually_Exclusive | BRCA2, COL3A1 | 0/2 |
| DCC    | BRCA2 | 1 | 0 | 36 | 0 | 1 | 1 | Mutually_Exclusive | BRCA2, DCC    | 0/2 |
| DROSHA | BRCA2 | 1 | 0 | 36 | 0 | 1 | 1 | Mutually_Exclusive | BRCA2, DROSHA | 0/2 |
| FLNA   | BRCA2 | 1 | 0 | 36 | 0 | 1 | 1 | Mutually_Exclusive | BRCA2, FLNA   | 0/2 |
| KAT6A  | BRCA2 | 1 | 0 | 36 | 0 | 1 | 1 | Mutually_Exclusive | BRCA2, KAT6A  | 0/2 |
| KAT6B  | BRCA2 | 1 | 0 | 36 | 0 | 1 | 1 | Mutually_Exclusive | BRCA2, KAT6B  | 0/2 |
| N4BP2  | BRCA2 | 1 | 0 | 36 | 0 | 1 | 1 | Mutually_Exclusive | BRCA2, N4BP2  | 0/2 |
| NCOR1  | BRCA2 | 1 | 0 | 36 | 0 | 1 | 1 | Mutually_Exclusive | BRCA2, NCOR1  | 0/2 |
| NF1    | BRCA2 | 1 | 0 | 36 | 0 | 1 | 1 | Mutually_Exclusive | BRCA2, NF1    | 0/2 |

|        |        |   |   |    |   |   |   |                    |                |     |
|--------|--------|---|---|----|---|---|---|--------------------|----------------|-----|
| NIN    | BRCA2  | 1 | 0 | 36 | 0 | 1 | 1 | Mutually_Exclusive | BRCA2, NIN     | 0/2 |
| NSD1   | BRCA2  | 1 | 0 | 36 | 0 | 1 | 1 | Mutually_Exclusive | BRCA2, NSD1    | 0/2 |
| POLD1  | BRCA2  | 1 | 0 | 36 | 0 | 1 | 1 | Mutually_Exclusive | BRCA2, POLD1   | 0/2 |
| RANBP2 | BRCA2  | 1 | 0 | 36 | 0 | 1 | 1 | Mutually_Exclusive | BRCA2, RANBP2  | 0/2 |
| RET    | BRCA2  | 1 | 0 | 36 | 0 | 1 | 1 | Mutually_Exclusive | BRCA2, RET     | 0/2 |
| RNF213 | BRCA2  | 1 | 0 | 36 | 0 | 1 | 1 | Mutually_Exclusive | BRCA2, RNF213  | 0/2 |
| SETD1B | BRCA2  | 1 | 0 | 36 | 0 | 1 | 1 | Mutually_Exclusive | BRCA2, SETD1B  | 0/2 |
| SPEN   | BRCA2  | 1 | 0 | 36 | 0 | 1 | 1 | Mutually_Exclusive | BRCA2, SPEN    | 0/2 |
| STAG1  | BRCA2  | 1 | 0 | 36 | 0 | 1 | 1 | Mutually_Exclusive | BRCA2, STAG1   | 0/2 |
| TERT   | BRCA2  | 1 | 0 | 36 | 0 | 1 | 1 | Mutually_Exclusive | BRCA2, TERT    | 0/2 |
| TNC    | BRCA2  | 1 | 0 | 36 | 0 | 1 | 1 | Mutually_Exclusive | BRCA2, TNC     | 0/2 |
| TPR    | BRCA2  | 1 | 0 | 36 | 0 | 1 | 1 | Mutually_Exclusive | BRCA2, TPR     | 0/2 |
| COL3A1 | COL1A1 | 1 | 0 | 36 | 0 | 1 | 1 | Mutually_Exclusive | COL1A1, COL3A1 | 0/2 |
| DCC    | COL1A1 | 1 | 0 | 36 | 0 | 1 | 1 | Mutually_Exclusive | COL1A1, DCC    | 0/2 |
| DROSHA | COL1A1 | 1 | 0 | 36 | 0 | 1 | 1 | Mutually_Exclusive | COL1A1, DROSHA | 0/2 |
| FANCA  | COL1A1 | 1 | 0 | 36 | 0 | 1 | 1 | Mutually_Exclusive | COL1A1, FANCA  | 0/2 |
| FLNA   | COL1A1 | 1 | 0 | 36 | 0 | 1 | 1 | Mutually_Exclusive | COL1A1, FLNA   | 0/2 |
| KAT6A  | COL1A1 | 1 | 0 | 36 | 0 | 1 | 1 | Mutually_Exclusive | COL1A1, KAT6A  | 0/2 |



|        |        |   |   |    |   |   |   |                    |                |     |
|--------|--------|---|---|----|---|---|---|--------------------|----------------|-----|
| KAT6B  | COL1A1 | 1 | 0 | 36 | 0 | 1 | 1 | Mutually_Exclusive | COL1A1, KAT6B  | 0/2 |
| N4BP2  | COL1A1 | 1 | 0 | 36 | 0 | 1 | 1 | Mutually_Exclusive | COL1A1, N4BP2  | 0/2 |
| NCOR1  | COL1A1 | 1 | 0 | 36 | 0 | 1 | 1 | Mutually_Exclusive | COL1A1, NCOR1  | 0/2 |
| NF1    | COL1A1 | 1 | 0 | 36 | 0 | 1 | 1 | Mutually_Exclusive | COL1A1, NF1    | 0/2 |
| NIN    | COL1A1 | 1 | 0 | 36 | 0 | 1 | 1 | Mutually_Exclusive | COL1A1, NIN    | 0/2 |
| NSD1   | COL1A1 | 1 | 0 | 36 | 0 | 1 | 1 | Mutually_Exclusive | COL1A1, NSD1   | 0/2 |
| POLD1  | COL1A1 | 1 | 0 | 36 | 0 | 1 | 1 | Mutually_Exclusive | COL1A1, POLD1  | 0/2 |
| RANBP2 | COL1A1 | 1 | 0 | 36 | 0 | 1 | 1 | Mutually_Exclusive | COL1A1, RANBP2 | 0/2 |
| RET    | COL1A1 | 1 | 0 | 36 | 0 | 1 | 1 | Mutually_Exclusive | COL1A1, RET    | 0/2 |
| RNF213 | COL1A1 | 1 | 0 | 36 | 0 | 1 | 1 | Mutually_Exclusive | COL1A1, RNF213 | 0/2 |
| SETD1B | COL1A1 | 1 | 0 | 36 | 0 | 1 | 1 | Mutually_Exclusive | COL1A1, SETD1B | 0/2 |
| SPEN   | COL1A1 | 1 | 0 | 36 | 0 | 1 | 1 | Mutually_Exclusive | COL1A1, SPEN   | 0/2 |
| STAG1  | COL1A1 | 1 | 0 | 36 | 0 | 1 | 1 | Mutually_Exclusive | COL1A1, STAG1  | 0/2 |
| TERT   | COL1A1 | 1 | 0 | 36 | 0 | 1 | 1 | Mutually_Exclusive | COL1A1, TERT   | 0/2 |
| TNC    | COL1A1 | 1 | 0 | 36 | 0 | 1 | 1 | Mutually_Exclusive | COL1A1, TNC    | 0/2 |
| TPR    | COL1A1 | 1 | 0 | 36 | 0 | 1 | 1 | Mutually_Exclusive | COL1A1, TPR    | 0/2 |
| ZMYM3  | COL1A1 | 1 | 0 | 36 | 0 | 1 | 1 | Mutually_Exclusive | COL1A1, ZMYM3  | 0/2 |
| DCC    | COL3A1 | 1 | 0 | 36 | 0 | 1 | 1 | Mutually_Exclusive | COL3A1, DCC    | 0/2 |

|        |        |   |   |    |   |   |   |                    |                |     |
|--------|--------|---|---|----|---|---|---|--------------------|----------------|-----|
| DROSHA | COL3A1 | 1 | 0 | 36 | 0 | 1 | 1 | Mutually_Exclusive | COL3A1, DROSHA | 0/2 |
| FANCA  | COL3A1 | 1 | 0 | 36 | 0 | 1 | 1 | Mutually_Exclusive | COL3A1, FANCA  | 0/2 |
| FLNA   | COL3A1 | 1 | 0 | 36 | 0 | 1 | 1 | Mutually_Exclusive | COL3A1, FLNA   | 0/2 |
| KAT6A  | COL3A1 | 1 | 0 | 36 | 0 | 1 | 1 | Mutually_Exclusive | COL3A1, KAT6A  | 0/2 |
| KAT6B  | COL3A1 | 1 | 0 | 36 | 0 | 1 | 1 | Mutually_Exclusive | COL3A1, KAT6B  | 0/2 |
| N4BP2  | COL3A1 | 1 | 0 | 36 | 0 | 1 | 1 | Mutually_Exclusive | COL3A1, N4BP2  | 0/2 |
| NCOR1  | COL3A1 | 1 | 0 | 36 | 0 | 1 | 1 | Mutually_Exclusive | COL3A1, NCOR1  | 0/2 |
| NF1    | COL3A1 | 1 | 0 | 36 | 0 | 1 | 1 | Mutually_Exclusive | COL3A1, NF1    | 0/2 |
| NIN    | COL3A1 | 1 | 0 | 36 | 0 | 1 | 1 | Mutually_Exclusive | COL3A1, NIN    | 0/2 |
| NSD1   | COL3A1 | 1 | 0 | 36 | 0 | 1 | 1 | Mutually_Exclusive | COL3A1, NSD1   | 0/2 |
| POLD1  | COL3A1 | 1 | 0 | 36 | 0 | 1 | 1 | Mutually_Exclusive | COL3A1, POLD1  | 0/2 |
| RANBP2 | COL3A1 | 1 | 0 | 36 | 0 | 1 | 1 | Mutually_Exclusive | COL3A1, RANBP2 | 0/2 |
| RET    | COL3A1 | 1 | 0 | 36 | 0 | 1 | 1 | Mutually_Exclusive | COL3A1, RET    | 0/2 |
| SETD1B | COL3A1 | 1 | 0 | 36 | 0 | 1 | 1 | Mutually_Exclusive | COL3A1, SETD1B | 0/2 |
| SPEN   | COL3A1 | 1 | 0 | 36 | 0 | 1 | 1 | Mutually_Exclusive | COL3A1, SPEN   | 0/2 |
| STAG1  | COL3A1 | 1 | 0 | 36 | 0 | 1 | 1 | Mutually_Exclusive | COL3A1, STAG1  | 0/2 |
| TERT   | COL3A1 | 1 | 0 | 36 | 0 | 1 | 1 | Mutually_Exclusive | COL3A1, TERT   | 0/2 |
| TNC    | COL3A1 | 1 | 0 | 36 | 0 | 1 | 1 | Mutually_Exclusive | COL3A1, TNC    | 0/2 |

|        |        |   |   |    |   |   |   |                    |               |     |
|--------|--------|---|---|----|---|---|---|--------------------|---------------|-----|
| TPR    | COL3A1 | 1 | 0 | 36 | 0 | 1 | 1 | Mutually_Exclusive | COL3A1, TPR   | 0/2 |
| ZMYM3  | COL3A1 | 1 | 0 | 36 | 0 | 1 | 1 | Mutually_Exclusive | COL3A1, ZMYM3 | 0/2 |
| DROSHA | DCC    | 1 | 0 | 36 | 0 | 1 | 1 | Mutually_Exclusive | DCC, DROSHA   | 0/2 |
| FANCA  | DCC    | 1 | 0 | 36 | 0 | 1 | 1 | Mutually_Exclusive | DCC, FANCA    | 0/2 |
| FLNA   | DCC    | 1 | 0 | 36 | 0 | 1 | 1 | Mutually_Exclusive | DCC, FLNA     | 0/2 |
| KAT6A  | DCC    | 1 | 0 | 36 | 0 | 1 | 1 | Mutually_Exclusive | DCC, KAT6A    | 0/2 |
| KAT6B  | DCC    | 1 | 0 | 36 | 0 | 1 | 1 | Mutually_Exclusive | DCC, KAT6B    | 0/2 |
| N4BP2  | DCC    | 1 | 0 | 36 | 0 | 1 | 1 | Mutually_Exclusive | DCC, N4BP2    | 0/2 |
| NCOR1  | DCC    | 1 | 0 | 36 | 0 | 1 | 1 | Mutually_Exclusive | DCC, NCOR1    | 0/2 |
| NF1    | DCC    | 1 | 0 | 36 | 0 | 1 | 1 | Mutually_Exclusive | DCC, NF1      | 0/2 |
| NIN    | DCC    | 1 | 0 | 36 | 0 | 1 | 1 | Mutually_Exclusive | DCC, NIN      | 0/2 |
| NSD1   | DCC    | 1 | 0 | 36 | 0 | 1 | 1 | Mutually_Exclusive | DCC, NSD1     | 0/2 |
| POLD1  | DCC    | 1 | 0 | 36 | 0 | 1 | 1 | Mutually_Exclusive | DCC, POLD1    | 0/2 |
| RANBP2 | DCC    | 1 | 0 | 36 | 0 | 1 | 1 | Mutually_Exclusive | DCC, RANBP2   | 0/2 |
| RET    | DCC    | 1 | 0 | 36 | 0 | 1 | 1 | Mutually_Exclusive | DCC, RET      | 0/2 |
| RNF213 | DCC    | 1 | 0 | 36 | 0 | 1 | 1 | Mutually_Exclusive | DCC, RNF213   | 0/2 |
| SETD1B | DCC    | 1 | 0 | 36 | 0 | 1 | 1 | Mutually_Exclusive | DCC, SETD1B   | 0/2 |
| SPEN   | DCC    | 1 | 0 | 36 | 0 | 1 | 1 | Mutually_Exclusive | DCC, SPEN     | 0/2 |

|        |        |   |   |    |   |   |   |                    |                |     |
|--------|--------|---|---|----|---|---|---|--------------------|----------------|-----|
| STAG1  | DCC    | 1 | 0 | 36 | 0 | 1 | 1 | Mutually_Exclusive | DCC, STAG1     | 0/2 |
| TERT   | DCC    | 1 | 0 | 36 | 0 | 1 | 1 | Mutually_Exclusive | DCC, TERT      | 0/2 |
| TNC    | DCC    | 1 | 0 | 36 | 0 | 1 | 1 | Mutually_Exclusive | DCC, TNC       | 0/2 |
| TPR    | DCC    | 1 | 0 | 36 | 0 | 1 | 1 | Mutually_Exclusive | DCC, TPR       | 0/2 |
| ZMYM3  | DCC    | 1 | 0 | 36 | 0 | 1 | 1 | Mutually_Exclusive | DCC, ZMYM3     | 0/2 |
| FANCA  | DROSHA | 1 | 0 | 36 | 0 | 1 | 1 | Mutually_Exclusive | DROSHA, FANCA  | 0/2 |
| FLNA   | DROSHA | 1 | 0 | 36 | 0 | 1 | 1 | Mutually_Exclusive | DROSHA, FLNA   | 0/2 |
| KAT6A  | DROSHA | 1 | 0 | 36 | 0 | 1 | 1 | Mutually_Exclusive | DROSHA, KAT6A  | 0/2 |
| KAT6B  | DROSHA | 1 | 0 | 36 | 0 | 1 | 1 | Mutually_Exclusive | DROSHA, KAT6B  | 0/2 |
| N4BP2  | DROSHA | 1 | 0 | 36 | 0 | 1 | 1 | Mutually_Exclusive | DROSHA, N4BP2  | 0/2 |
| NCOR1  | DROSHA | 1 | 0 | 36 | 0 | 1 | 1 | Mutually_Exclusive | DROSHA, NCOR1  | 0/2 |
| NF1    | DROSHA | 1 | 0 | 36 | 0 | 1 | 1 | Mutually_Exclusive | DROSHA, NF1    | 0/2 |
| NIN    | DROSHA | 1 | 0 | 36 | 0 | 1 | 1 | Mutually_Exclusive | DROSHA, NIN    | 0/2 |
| NSD1   | DROSHA | 1 | 0 | 36 | 0 | 1 | 1 | Mutually_Exclusive | DROSHA, NSD1   | 0/2 |
| POLD1  | DROSHA | 1 | 0 | 36 | 0 | 1 | 1 | Mutually_Exclusive | DROSHA, POLD1  | 0/2 |
| RANBP2 | DROSHA | 1 | 0 | 36 | 0 | 1 | 1 | Mutually_Exclusive | DROSHA, RANBP2 | 0/2 |
| RET    | DROSHA | 1 | 0 | 36 | 0 | 1 | 1 | Mutually_Exclusive | DROSHA, RET    | 0/2 |
| RNF213 | DROSHA | 1 | 0 | 36 | 0 | 1 | 1 | Mutually_Exclusive | DROSHA, RNF213 | 0/2 |

|        |        |   |   |    |   |   |   |                    |                |     |
|--------|--------|---|---|----|---|---|---|--------------------|----------------|-----|
| SETD1B | DROSHA | 1 | 0 | 36 | 0 | 1 | 1 | Mutually_Exclusive | DROSHA, SETD1B | 0/2 |
| SPEN   | DROSHA | 1 | 0 | 36 | 0 | 1 | 1 | Mutually_Exclusive | DROSHA, SPEN   | 0/2 |
| STAG1  | DROSHA | 1 | 0 | 36 | 0 | 1 | 1 | Mutually_Exclusive | DROSHA, STAG1  | 0/2 |
| TERT   | DROSHA | 1 | 0 | 36 | 0 | 1 | 1 | Mutually_Exclusive | DROSHA, TERT   | 0/2 |
| TNC    | DROSHA | 1 | 0 | 36 | 0 | 1 | 1 | Mutually_Exclusive | DROSHA, TNC    | 0/2 |
| TPR    | DROSHA | 1 | 0 | 36 | 0 | 1 | 1 | Mutually_Exclusive | DROSHA, TPR    | 0/2 |
| ZMYM3  | DROSHA | 1 | 0 | 36 | 0 | 1 | 1 | Mutually_Exclusive | DROSHA, ZMYM3  | 0/2 |
| FLNA   | FANCA  | 1 | 0 | 36 | 0 | 1 | 1 | Mutually_Exclusive | FANCA, FLNA    | 0/2 |
| KAT6A  | FANCA  | 1 | 0 | 36 | 0 | 1 | 1 | Mutually_Exclusive | FANCA, KAT6A   | 0/2 |
| KAT6B  | FANCA  | 1 | 0 | 36 | 0 | 1 | 1 | Mutually_Exclusive | FANCA, KAT6B   | 0/2 |
| N4BP2  | FANCA  | 1 | 0 | 36 | 0 | 1 | 1 | Mutually_Exclusive | FANCA, N4BP2   | 0/2 |
| NCOR1  | FANCA  | 1 | 0 | 36 | 0 | 1 | 1 | Mutually_Exclusive | FANCA, NCOR1   | 0/2 |
| NF1    | FANCA  | 1 | 0 | 36 | 0 | 1 | 1 | Mutually_Exclusive | FANCA, NF1     | 0/2 |
| NIN    | FANCA  | 1 | 0 | 36 | 0 | 1 | 1 | Mutually_Exclusive | FANCA, NIN     | 0/2 |
| NSD1   | FANCA  | 1 | 0 | 36 | 0 | 1 | 1 | Mutually_Exclusive | FANCA, NSD1    | 0/2 |
| POLD1  | FANCA  | 1 | 0 | 36 | 0 | 1 | 1 | Mutually_Exclusive | FANCA, POLD1   | 0/2 |
| RANBP2 | FANCA  | 1 | 0 | 36 | 0 | 1 | 1 | Mutually_Exclusive | FANCA, RANBP2  | 0/2 |
| RET    | FANCA  | 1 | 0 | 36 | 0 | 1 | 1 | Mutually_Exclusive | FANCA, RET     | 0/2 |

|        |       |   |   |    |   |   |   |                    |               |     |
|--------|-------|---|---|----|---|---|---|--------------------|---------------|-----|
| RNF213 | FANCA | 1 | 0 | 36 | 0 | 1 | 1 | Mutually_Exclusive | FANCA, RNF213 | 0/2 |
| SETD1B | FANCA | 1 | 0 | 36 | 0 | 1 | 1 | Mutually_Exclusive | FANCA, SETD1B | 0/2 |
| SPEN   | FANCA | 1 | 0 | 36 | 0 | 1 | 1 | Mutually_Exclusive | FANCA, SPEN   | 0/2 |
| STAG1  | FANCA | 1 | 0 | 36 | 0 | 1 | 1 | Mutually_Exclusive | FANCA, STAG1  | 0/2 |
| TERT   | FANCA | 1 | 0 | 36 | 0 | 1 | 1 | Mutually_Exclusive | FANCA, TERT   | 0/2 |
| TNC    | FANCA | 1 | 0 | 36 | 0 | 1 | 1 | Mutually_Exclusive | FANCA, TNC    | 0/2 |
| TPR    | FANCA | 1 | 0 | 36 | 0 | 1 | 1 | Mutually_Exclusive | FANCA, TPR    | 0/2 |
| KAT6A  | FLNA  | 1 | 0 | 36 | 0 | 1 | 1 | Mutually_Exclusive | FLNA, KAT6A   | 0/2 |
| KAT6B  | FLNA  | 1 | 0 | 36 | 0 | 1 | 1 | Mutually_Exclusive | FLNA, KAT6B   | 0/2 |
| N4BP2  | FLNA  | 1 | 0 | 36 | 0 | 1 | 1 | Mutually_Exclusive | FLNA, N4BP2   | 0/2 |
| NCOR1  | FLNA  | 1 | 0 | 36 | 0 | 1 | 1 | Mutually_Exclusive | FLNA, NCOR1   | 0/2 |
| NF1    | FLNA  | 1 | 0 | 36 | 0 | 1 | 1 | Mutually_Exclusive | FLNA, NF1     | 0/2 |
| NIN    | FLNA  | 1 | 0 | 36 | 0 | 1 | 1 | Mutually_Exclusive | FLNA, NIN     | 0/2 |
| NSD1   | FLNA  | 1 | 0 | 36 | 0 | 1 | 1 | Mutually_Exclusive | FLNA, NSD1    | 0/2 |
| POLD1  | FLNA  | 1 | 0 | 36 | 0 | 1 | 1 | Mutually_Exclusive | FLNA, POLD1   | 0/2 |
| RANBP2 | FLNA  | 1 | 0 | 36 | 0 | 1 | 1 | Mutually_Exclusive | FLNA, RANBP2  | 0/2 |
| RET    | FLNA  | 1 | 0 | 36 | 0 | 1 | 1 | Mutually_Exclusive | FLNA, RET     | 0/2 |
| RNF213 | FLNA  | 1 | 0 | 36 | 0 | 1 | 1 | Mutually_Exclusive | FLNA, RNF213  | 0/2 |

|        |       |   |   |    |   |   |   |                    |               |     |
|--------|-------|---|---|----|---|---|---|--------------------|---------------|-----|
| SETD1B | FLNA  | 1 | 0 | 36 | 0 | 1 | 1 | Mutually_Exclusive | FLNA, SETD1B  | 0/2 |
| SPEN   | FLNA  | 1 | 0 | 36 | 0 | 1 | 1 | Mutually_Exclusive | FLNA, SPEN    | 0/2 |
| STAG1  | FLNA  | 1 | 0 | 36 | 0 | 1 | 1 | Mutually_Exclusive | FLNA, STAG1   | 0/2 |
| TERT   | FLNA  | 1 | 0 | 36 | 0 | 1 | 1 | Mutually_Exclusive | FLNA, TERT    | 0/2 |
| TNC    | FLNA  | 1 | 0 | 36 | 0 | 1 | 1 | Mutually_Exclusive | FLNA, TNC     | 0/2 |
| TPR    | FLNA  | 1 | 0 | 36 | 0 | 1 | 1 | Mutually_Exclusive | FLNA, TPR     | 0/2 |
| ZMYM3  | FLNA  | 1 | 0 | 36 | 0 | 1 | 1 | Mutually_Exclusive | FLNA, ZMYM3   | 0/2 |
| KAT6B  | KAT6A | 1 | 0 | 36 | 0 | 1 | 1 | Mutually_Exclusive | KAT6A, KAT6B  | 0/2 |
| N4BP2  | KAT6A | 1 | 0 | 36 | 0 | 1 | 1 | Mutually_Exclusive | KAT6A, N4BP2  | 0/2 |
| NCOR1  | KAT6A | 1 | 0 | 36 | 0 | 1 | 1 | Mutually_Exclusive | KAT6A, NCOR1  | 0/2 |
| NF1    | KAT6A | 1 | 0 | 36 | 0 | 1 | 1 | Mutually_Exclusive | KAT6A, NF1    | 0/2 |
| NIN    | KAT6A | 1 | 0 | 36 | 0 | 1 | 1 | Mutually_Exclusive | KAT6A, NIN    | 0/2 |
| NSD1   | KAT6A | 1 | 0 | 36 | 0 | 1 | 1 | Mutually_Exclusive | KAT6A, NSD1   | 0/2 |
| POLD1  | KAT6A | 1 | 0 | 36 | 0 | 1 | 1 | Mutually_Exclusive | KAT6A, POLD1  | 0/2 |
| RANBP2 | KAT6A | 1 | 0 | 36 | 0 | 1 | 1 | Mutually_Exclusive | KAT6A, RANBP2 | 0/2 |
| RET    | KAT6A | 1 | 0 | 36 | 0 | 1 | 1 | Mutually_Exclusive | KAT6A, RET    | 0/2 |
| RNF213 | KAT6A | 1 | 0 | 36 | 0 | 1 | 1 | Mutually_Exclusive | KAT6A, RNF213 | 0/2 |
| SETD1B | KAT6A | 1 | 0 | 36 | 0 | 1 | 1 | Mutually_Exclusive | KAT6A, SETD1B | 0/2 |

|        |       |   |   |    |   |   |   |                    |               |     |
|--------|-------|---|---|----|---|---|---|--------------------|---------------|-----|
| SPEN   | KAT6A | 1 | 0 | 36 | 0 | 1 | 1 | Mutually_Exclusive | KAT6A, SPEN   | 0/2 |
| STAG1  | KAT6A | 1 | 0 | 36 | 0 | 1 | 1 | Mutually_Exclusive | KAT6A, STAG1  | 0/2 |
| TERT   | KAT6A | 1 | 0 | 36 | 0 | 1 | 1 | Mutually_Exclusive | KAT6A, TERT   | 0/2 |
| TNC    | KAT6A | 1 | 0 | 36 | 0 | 1 | 1 | Mutually_Exclusive | KAT6A, TNC    | 0/2 |
| TPR    | KAT6A | 1 | 0 | 36 | 0 | 1 | 1 | Mutually_Exclusive | KAT6A, TPR    | 0/2 |
| ZMYM3  | KAT6A | 1 | 0 | 36 | 0 | 1 | 1 | Mutually_Exclusive | KAT6A, ZMYM3  | 0/2 |
| N4BP2  | KAT6B | 1 | 0 | 36 | 0 | 1 | 1 | Mutually_Exclusive | KAT6B, N4BP2  | 0/2 |
| NCOR1  | KAT6B | 1 | 0 | 36 | 0 | 1 | 1 | Mutually_Exclusive | KAT6B, NCOR1  | 0/2 |
| NF1    | KAT6B | 1 | 0 | 36 | 0 | 1 | 1 | Mutually_Exclusive | KAT6B, NF1    | 0/2 |
| NIN    | KAT6B | 1 | 0 | 36 | 0 | 1 | 1 | Mutually_Exclusive | KAT6B, NIN    | 0/2 |
| NSD1   | KAT6B | 1 | 0 | 36 | 0 | 1 | 1 | Mutually_Exclusive | KAT6B, NSD1   | 0/2 |
| POLD1  | KAT6B | 1 | 0 | 36 | 0 | 1 | 1 | Mutually_Exclusive | KAT6B, POLD1  | 0/2 |
| RET    | KAT6B | 1 | 0 | 36 | 0 | 1 | 1 | Mutually_Exclusive | KAT6B, RET    | 0/2 |
| RNF213 | KAT6B | 1 | 0 | 36 | 0 | 1 | 1 | Mutually_Exclusive | KAT6B, RNF213 | 0/2 |
| SETD1B | KAT6B | 1 | 0 | 36 | 0 | 1 | 1 | Mutually_Exclusive | KAT6B, SETD1B | 0/2 |
| SPEN   | KAT6B | 1 | 0 | 36 | 0 | 1 | 1 | Mutually_Exclusive | KAT6B, SPEN   | 0/2 |
| STAG1  | KAT6B | 1 | 0 | 36 | 0 | 1 | 1 | Mutually_Exclusive | KAT6B, STAG1  | 0/2 |
| TERT   | KAT6B | 1 | 0 | 36 | 0 | 1 | 1 | Mutually_Exclusive | KAT6B, TERT   | 0/2 |



|        |       |   |   |    |   |   |   |                    |               |     |
|--------|-------|---|---|----|---|---|---|--------------------|---------------|-----|
| TNC    | KAT6B | 1 | 0 | 36 | 0 | 1 | 1 | Mutually_Exclusive | KAT6B, TNC    | 0/2 |
| TPR    | KAT6B | 1 | 0 | 36 | 0 | 1 | 1 | Mutually_Exclusive | KAT6B, TPR    | 0/2 |
| ZMYM3  | KAT6B | 1 | 0 | 36 | 0 | 1 | 1 | Mutually_Exclusive | KAT6B, ZMYM3  | 0/2 |
| NCOR1  | N4BP2 | 1 | 0 | 36 | 0 | 1 | 1 | Mutually_Exclusive | N4BP2, NCOR1  | 0/2 |
| NF1    | N4BP2 | 1 | 0 | 36 | 0 | 1 | 1 | Mutually_Exclusive | N4BP2, NF1    | 0/2 |
| NIN    | N4BP2 | 1 | 0 | 36 | 0 | 1 | 1 | Mutually_Exclusive | N4BP2, NIN    | 0/2 |
| NSD1   | N4BP2 | 1 | 0 | 36 | 0 | 1 | 1 | Mutually_Exclusive | N4BP2, NSD1   | 0/2 |
| POLD1  | N4BP2 | 1 | 0 | 36 | 0 | 1 | 1 | Mutually_Exclusive | N4BP2, POLD1  | 0/2 |
| RANBP2 | N4BP2 | 1 | 0 | 36 | 0 | 1 | 1 | Mutually_Exclusive | N4BP2, RANBP2 | 0/2 |
| RET    | N4BP2 | 1 | 0 | 36 | 0 | 1 | 1 | Mutually_Exclusive | N4BP2, RET    | 0/2 |
| RNF213 | N4BP2 | 1 | 0 | 36 | 0 | 1 | 1 | Mutually_Exclusive | N4BP2, RNF213 | 0/2 |
| SETD1B | N4BP2 | 1 | 0 | 36 | 0 | 1 | 1 | Mutually_Exclusive | N4BP2, SETD1B | 0/2 |
| SPEN   | N4BP2 | 1 | 0 | 36 | 0 | 1 | 1 | Mutually_Exclusive | N4BP2, SPEN   | 0/2 |
| STAG1  | N4BP2 | 1 | 0 | 36 | 0 | 1 | 1 | Mutually_Exclusive | N4BP2, STAG1  | 0/2 |
| TERT   | N4BP2 | 1 | 0 | 36 | 0 | 1 | 1 | Mutually_Exclusive | N4BP2, TERT   | 0/2 |
| TNC    | N4BP2 | 1 | 0 | 36 | 0 | 1 | 1 | Mutually_Exclusive | N4BP2, TNC    | 0/2 |
| TPR    | N4BP2 | 1 | 0 | 36 | 0 | 1 | 1 | Mutually_Exclusive | N4BP2, TPR    | 0/2 |
| ZMYM3  | N4BP2 | 1 | 0 | 36 | 0 | 1 | 1 | Mutually_Exclusive | N4BP2, ZMYM3  | 0/2 |

|        |       |   |   |    |   |   |   |                    |               |     |
|--------|-------|---|---|----|---|---|---|--------------------|---------------|-----|
| NF1    | NCOR1 | 1 | 0 | 36 | 0 | 1 | 1 | Mutually_Exclusive | NCOR1, NF1    | 0/2 |
| NIN    | NCOR1 | 1 | 0 | 36 | 0 | 1 | 1 | Mutually_Exclusive | NCOR1, NIN    | 0/2 |
| NSD1   | NCOR1 | 1 | 0 | 36 | 0 | 1 | 1 | Mutually_Exclusive | NCOR1, NSD1   | 0/2 |
| POLD1  | NCOR1 | 1 | 0 | 36 | 0 | 1 | 1 | Mutually_Exclusive | NCOR1, POLD1  | 0/2 |
| RANBP2 | NCOR1 | 1 | 0 | 36 | 0 | 1 | 1 | Mutually_Exclusive | NCOR1, RANBP2 | 0/2 |
| RET    | NCOR1 | 1 | 0 | 36 | 0 | 1 | 1 | Mutually_Exclusive | NCOR1, RET    | 0/2 |
| RNF213 | NCOR1 | 1 | 0 | 36 | 0 | 1 | 1 | Mutually_Exclusive | NCOR1, RNF213 | 0/2 |
| SETD1B | NCOR1 | 1 | 0 | 36 | 0 | 1 | 1 | Mutually_Exclusive | NCOR1, SETD1B | 0/2 |
| SPEN   | NCOR1 | 1 | 0 | 36 | 0 | 1 | 1 | Mutually_Exclusive | NCOR1, SPEN   | 0/2 |
| STAG1  | NCOR1 | 1 | 0 | 36 | 0 | 1 | 1 | Mutually_Exclusive | NCOR1, STAG1  | 0/2 |
| TERT   | NCOR1 | 1 | 0 | 36 | 0 | 1 | 1 | Mutually_Exclusive | NCOR1, TERT   | 0/2 |
| TNC    | NCOR1 | 1 | 0 | 36 | 0 | 1 | 1 | Mutually_Exclusive | NCOR1, TNC    | 0/2 |
| TPR    | NCOR1 | 1 | 0 | 36 | 0 | 1 | 1 | Mutually_Exclusive | NCOR1, TPR    | 0/2 |
| ZMYM3  | NCOR1 | 1 | 0 | 36 | 0 | 1 | 1 | Mutually_Exclusive | NCOR1, ZMYM3  | 0/2 |
| NIN    | NF1   | 1 | 0 | 36 | 0 | 1 | 1 | Mutually_Exclusive | NF1, NIN      | 0/2 |
| NSD1   | NF1   | 1 | 0 | 36 | 0 | 1 | 1 | Mutually_Exclusive | NF1, NSD1     | 0/2 |
| POLD1  | NF1   | 1 | 0 | 36 | 0 | 1 | 1 | Mutually_Exclusive | NF1, POLD1    | 0/2 |
| RANBP2 | NF1   | 1 | 0 | 36 | 0 | 1 | 1 | Mutually_Exclusive | NF1, RANBP2   | 0/2 |

|        |     |   |   |    |   |   |   |                    |             |     |
|--------|-----|---|---|----|---|---|---|--------------------|-------------|-----|
| RET    | NF1 | 1 | 0 | 36 | 0 | 1 | 1 | Mutually_Exclusive | NF1, RET    | 0/2 |
| RNF213 | NF1 | 1 | 0 | 36 | 0 | 1 | 1 | Mutually_Exclusive | NF1, RNF213 | 0/2 |
| SETD1B | NF1 | 1 | 0 | 36 | 0 | 1 | 1 | Mutually_Exclusive | NF1, SETD1B | 0/2 |
| SPEN   | NF1 | 1 | 0 | 36 | 0 | 1 | 1 | Mutually_Exclusive | NF1, SPEN   | 0/2 |
| STAG1  | NF1 | 1 | 0 | 36 | 0 | 1 | 1 | Mutually_Exclusive | NF1, STAG1  | 0/2 |
| TERT   | NF1 | 1 | 0 | 36 | 0 | 1 | 1 | Mutually_Exclusive | NF1, TERT   | 0/2 |
| TNC    | NF1 | 1 | 0 | 36 | 0 | 1 | 1 | Mutually_Exclusive | NF1, TNC    | 0/2 |
| TPR    | NF1 | 1 | 0 | 36 | 0 | 1 | 1 | Mutually_Exclusive | NF1, TPR    | 0/2 |
| ZMYM3  | NF1 | 1 | 0 | 36 | 0 | 1 | 1 | Mutually_Exclusive | NF1, ZMYM3  | 0/2 |
| NSD1   | NIN | 1 | 0 | 36 | 0 | 1 | 1 | Mutually_Exclusive | NIN, NSD1   | 0/2 |
| POLD1  | NIN | 1 | 0 | 36 | 0 | 1 | 1 | Mutually_Exclusive | NIN, POLD1  | 0/2 |
| RANBP2 | NIN | 1 | 0 | 36 | 0 | 1 | 1 | Mutually_Exclusive | NIN, RANBP2 | 0/2 |
| RET    | NIN | 1 | 0 | 36 | 0 | 1 | 1 | Mutually_Exclusive | NIN, RET    | 0/2 |
| RNF213 | NIN | 1 | 0 | 36 | 0 | 1 | 1 | Mutually_Exclusive | NIN, RNF213 | 0/2 |
| SETD1B | NIN | 1 | 0 | 36 | 0 | 1 | 1 | Mutually_Exclusive | NIN, SETD1B | 0/2 |
| SPEN   | NIN | 1 | 0 | 36 | 0 | 1 | 1 | Mutually_Exclusive | NIN, SPEN   | 0/2 |
| STAG1  | NIN | 1 | 0 | 36 | 0 | 1 | 1 | Mutually_Exclusive | NIN, STAG1  | 0/2 |
| TERT   | NIN | 1 | 0 | 36 | 0 | 1 | 1 | Mutually_Exclusive | NIN, TERT   | 0/2 |

|        |       |   |   |    |   |   |   |                    |               |     |
|--------|-------|---|---|----|---|---|---|--------------------|---------------|-----|
| TNC    | NIN   | 1 | 0 | 36 | 0 | 1 | 1 | Mutually_Exclusive | NIN, TNC      | 0/2 |
| TPR    | NIN   | 1 | 0 | 36 | 0 | 1 | 1 | Mutually_Exclusive | NIN, TPR      | 0/2 |
| ZMYM3  | NIN   | 1 | 0 | 36 | 0 | 1 | 1 | Mutually_Exclusive | NIN, ZMYM3    | 0/2 |
| POLD1  | NSD1  | 1 | 0 | 36 | 0 | 1 | 1 | Mutually_Exclusive | NSD1, POLD1   | 0/2 |
| RANBP2 | NSD1  | 1 | 0 | 36 | 0 | 1 | 1 | Mutually_Exclusive | NSD1, RANBP2  | 0/2 |
| RET    | NSD1  | 1 | 0 | 36 | 0 | 1 | 1 | Mutually_Exclusive | NSD1, RET     | 0/2 |
| RNF213 | NSD1  | 1 | 0 | 36 | 0 | 1 | 1 | Mutually_Exclusive | NSD1, RNF213  | 0/2 |
| SPEN   | NSD1  | 1 | 0 | 36 | 0 | 1 | 1 | Mutually_Exclusive | NSD1, SPEN    | 0/2 |
| STAG1  | NSD1  | 1 | 0 | 36 | 0 | 1 | 1 | Mutually_Exclusive | NSD1, STAG1   | 0/2 |
| TERT   | NSD1  | 1 | 0 | 36 | 0 | 1 | 1 | Mutually_Exclusive | NSD1, TERT    | 0/2 |
| TNC    | NSD1  | 1 | 0 | 36 | 0 | 1 | 1 | Mutually_Exclusive | NSD1, TNC     | 0/2 |
| TPR    | NSD1  | 1 | 0 | 36 | 0 | 1 | 1 | Mutually_Exclusive | NSD1, TPR     | 0/2 |
| ZMYM3  | NSD1  | 1 | 0 | 36 | 0 | 1 | 1 | Mutually_Exclusive | NSD1, ZMYM3   | 0/2 |
| RANBP2 | POLD1 | 1 | 0 | 36 | 0 | 1 | 1 | Mutually_Exclusive | POLD1, RANBP2 | 0/2 |
| RET    | POLD1 | 1 | 0 | 36 | 0 | 1 | 1 | Mutually_Exclusive | POLD1, RET    | 0/2 |
| RNF213 | POLD1 | 1 | 0 | 36 | 0 | 1 | 1 | Mutually_Exclusive | POLD1, RNF213 | 0/2 |
| SETD1B | POLD1 | 1 | 0 | 36 | 0 | 1 | 1 | Mutually_Exclusive | POLD1, SETD1B | 0/2 |
| SPEN   | POLD1 | 1 | 0 | 36 | 0 | 1 | 1 | Mutually_Exclusive | POLD1, SPEN   | 0/2 |

|        |        |   |   |    |   |   |   |                    |                |     |
|--------|--------|---|---|----|---|---|---|--------------------|----------------|-----|
| STAG1  | POLD1  | 1 | 0 | 36 | 0 | 1 | 1 | Mutually_Exclusive | POLD1, STAG1   | 0/2 |
| TERT   | POLD1  | 1 | 0 | 36 | 0 | 1 | 1 | Mutually_Exclusive | POLD1, TERT    | 0/2 |
| TNC    | POLD1  | 1 | 0 | 36 | 0 | 1 | 1 | Mutually_Exclusive | POLD1, TNC     | 0/2 |
| TPR    | POLD1  | 1 | 0 | 36 | 0 | 1 | 1 | Mutually_Exclusive | POLD1, TPR     | 0/2 |
| ZMYM3  | POLD1  | 1 | 0 | 36 | 0 | 1 | 1 | Mutually_Exclusive | POLD1, ZMYM3   | 0/2 |
| RET    | RANBP2 | 1 | 0 | 36 | 0 | 1 | 1 | Mutually_Exclusive | RANBP2, RET    | 0/2 |
| RNF213 | RANBP2 | 1 | 0 | 36 | 0 | 1 | 1 | Mutually_Exclusive | RANBP2, RNF213 | 0/2 |
| SETD1B | RANBP2 | 1 | 0 | 36 | 0 | 1 | 1 | Mutually_Exclusive | RANBP2, SETD1B | 0/2 |
| SPEN   | RANBP2 | 1 | 0 | 36 | 0 | 1 | 1 | Mutually_Exclusive | RANBP2, SPEN   | 0/2 |
| STAG1  | RANBP2 | 1 | 0 | 36 | 0 | 1 | 1 | Mutually_Exclusive | RANBP2, STAG1  | 0/2 |
| TERT   | RANBP2 | 1 | 0 | 36 | 0 | 1 | 1 | Mutually_Exclusive | RANBP2, TERT   | 0/2 |
| TNC    | RANBP2 | 1 | 0 | 36 | 0 | 1 | 1 | Mutually_Exclusive | RANBP2, TNC    | 0/2 |
| TPR    | RANBP2 | 1 | 0 | 36 | 0 | 1 | 1 | Mutually_Exclusive | RANBP2, TPR    | 0/2 |
| ZMYM3  | RANBP2 | 1 | 0 | 36 | 0 | 1 | 1 | Mutually_Exclusive | RANBP2, ZMYM3  | 0/2 |
| RNF213 | RET    | 1 | 0 | 36 | 0 | 1 | 1 | Mutually_Exclusive | RET, RNF213    | 0/2 |
| SETD1B | RET    | 1 | 0 | 36 | 0 | 1 | 1 | Mutually_Exclusive | RET, SETD1B    | 0/2 |
| SPEN   | RET    | 1 | 0 | 36 | 0 | 1 | 1 | Mutually_Exclusive | RET, SPEN      | 0/2 |
| STAG1  | RET    | 1 | 0 | 36 | 0 | 1 | 1 | Mutually_Exclusive | RET, STAG1     | 0/2 |

|        |        |   |   |    |   |   |   |                    |                |     |
|--------|--------|---|---|----|---|---|---|--------------------|----------------|-----|
| TERT   | RET    | 1 | 0 | 36 | 0 | 1 | 1 | Mutually_Exclusive | RET, TERT      | 0/2 |
| TNC    | RET    | 1 | 0 | 36 | 0 | 1 | 1 | Mutually_Exclusive | RET, TNC       | 0/2 |
| TPR    | RET    | 1 | 0 | 36 | 0 | 1 | 1 | Mutually_Exclusive | RET, TPR       | 0/2 |
| ZMYM3  | RET    | 1 | 0 | 36 | 0 | 1 | 1 | Mutually_Exclusive | RET, ZMYM3     | 0/2 |
| SETD1B | RNF213 | 1 | 0 | 36 | 0 | 1 | 1 | Mutually_Exclusive | RNF213, SETD1B | 0/2 |
| SPEN   | RNF213 | 1 | 0 | 36 | 0 | 1 | 1 | Mutually_Exclusive | RNF213, SPEN   | 0/2 |
| STAG1  | RNF213 | 1 | 0 | 36 | 0 | 1 | 1 | Mutually_Exclusive | RNF213, STAG1  | 0/2 |
| TERT   | RNF213 | 1 | 0 | 36 | 0 | 1 | 1 | Mutually_Exclusive | RNF213, TERT   | 0/2 |
| TNC    | RNF213 | 1 | 0 | 36 | 0 | 1 | 1 | Mutually_Exclusive | RNF213, TNC    | 0/2 |
| TPR    | RNF213 | 1 | 0 | 36 | 0 | 1 | 1 | Mutually_Exclusive | RNF213, TPR    | 0/2 |
| ZMYM3  | RNF213 | 1 | 0 | 36 | 0 | 1 | 1 | Mutually_Exclusive | RNF213, ZMYM3  | 0/2 |
| SPEN   | SETD1B | 1 | 0 | 36 | 0 | 1 | 1 | Mutually_Exclusive | SETD1B, SPEN   | 0/2 |
| STAG1  | SETD1B | 1 | 0 | 36 | 0 | 1 | 1 | Mutually_Exclusive | SETD1B, STAG1  | 0/2 |
| TERT   | SETD1B | 1 | 0 | 36 | 0 | 1 | 1 | Mutually_Exclusive | SETD1B, TERT   | 0/2 |
| TNC    | SETD1B | 1 | 0 | 36 | 0 | 1 | 1 | Mutually_Exclusive | SETD1B, TNC    | 0/2 |
| TPR    | SETD1B | 1 | 0 | 36 | 0 | 1 | 1 | Mutually_Exclusive | SETD1B, TPR    | 0/2 |
| ZMYM3  | SETD1B | 1 | 0 | 36 | 0 | 1 | 1 | Mutually_Exclusive | SETD1B, ZMYM3  | 0/2 |
| STAG1  | SPEN   | 1 | 0 | 36 | 0 | 1 | 1 | Mutually_Exclusive | SPEN, STAG1    | 0/2 |

|       |       |   |   |    |   |   |   |                    |              |     |
|-------|-------|---|---|----|---|---|---|--------------------|--------------|-----|
| TERT  | SPEN  | 1 | 0 | 36 | 0 | 1 | 1 | Mutually_Exclusive | SPEN, TERT   | 0/2 |
| TNC   | SPEN  | 1 | 0 | 36 | 0 | 1 | 1 | Mutually_Exclusive | SPEN, TNC    | 0/2 |
| TPR   | SPEN  | 1 | 0 | 36 | 0 | 1 | 1 | Mutually_Exclusive | SPEN, TPR    | 0/2 |
| ZMYM3 | SPEN  | 1 | 0 | 36 | 0 | 1 | 1 | Mutually_Exclusive | SPEN, ZMYM3  | 0/2 |
| TERT  | STAG1 | 1 | 0 | 36 | 0 | 1 | 1 | Mutually_Exclusive | STAG1, TERT  | 0/2 |
| TNC   | STAG1 | 1 | 0 | 36 | 0 | 1 | 1 | Mutually_Exclusive | STAG1, TNC   | 0/2 |
| ZMYM3 | STAG1 | 1 | 0 | 36 | 0 | 1 | 1 | Mutually_Exclusive | STAG1, ZMYM3 | 0/2 |
| TNC   | TERT  | 1 | 0 | 36 | 0 | 1 | 1 | Mutually_Exclusive | TERT, TNC    | 0/2 |
| TPR   | TERT  | 1 | 0 | 36 | 0 | 1 | 1 | Mutually_Exclusive | TERT, TPR    | 0/2 |
| ZMYM3 | TERT  | 1 | 0 | 36 | 0 | 1 | 1 | Mutually_Exclusive | TERT, ZMYM3  | 0/2 |
| TPR   | TNC   | 1 | 0 | 36 | 0 | 1 | 1 | Mutually_Exclusive | TNC, TPR     | 0/2 |
| ZMYM3 | TNC   | 1 | 0 | 36 | 0 | 1 | 1 | Mutually_Exclusive | TNC, ZMYM3   | 0/2 |
| ZMYM3 | TPR   | 1 | 0 | 36 | 0 | 1 | 1 | Mutually_Exclusive | TPR, ZMYM3   | 0/2 |
