# Supplementary material for: Genomic and immunological profiles of small-cell lung cancer between East Asians and Caucasian
Source: Springer Nature journal article supplement (doi:10.1186/s12935-022-02588-w), 2022-04-29
Supplement: MOESM14 [file 20359852]

Supplementary Table.5 Related to Supplementary Fig. 5a The results of the CMap analysis of the EA cohort (TP53/RB1 co-mutations vs No alterations in TP53/RB1).

| rank | cmap name                         | mean   | n  | enrichment | p       | specificity | percent non-null |
|------|-----------------------------------|--------|----|------------|---------|-------------|------------------|
| 1    | hycanthone                        | 0.649  | 4  | 0.958      | 0       | 0.0259      | 100              |
| 2    | tanespimycin                      | -0.373 | 62 | -0.412     | 0       | 0.1344      | 54               |
| 3    | metronidazole                     | 0.536  | 5  | 0.85       | 0.00018 | 0.006       | 100              |
| 4    | monensin                          | 0.37   | 6  | 0.686      | 0.00242 | 0.09        | 83               |
| 5    | 5255229                           | -0.706 | 2  | -0.965     | 0.00274 | 0.0082      | 100              |
| 6    | thapsigargin                      | -0.645 | 3  | -0.886     | 0.00288 | 0.0903      | 100              |
| 7    | bucladesine                       | -0.474 | 6  | -0.674     | 0.00326 | 0           | 83               |
| 8    | pinacidil                         | 0.206  | 4  | 0.772      | 0.00515 | 0.0076      | 50               |
| 9    | SC-560                            | -0.471 | 3  | -0.834     | 0.00907 | 0.0546      | 100              |
| 10   | mitoxantrone                      | 0.394  | 3  | 0.832      | 0.00951 | 0.0643      | 66               |
| 11   | 16-phenyltetranorprostaglandin E2 | -0.439 | 4  | -0.729     | 0.01094 | 0.0119      | 75               |
| 12   | iproniazid                        | 0.365  | 5  | 0.658      | 0.0124  | 0.0503      | 80               |
| 13   | mianserin                         | -0.472 | 5  | -0.652     | 0.01252 | 0           | 80               |
| 14   | xamoterol                         | -0.372 | 3  | -0.814     | 0.0126  | 0.0343      | 66               |
| 15   | STOCK1N-35215                     | 0.272  | 3  | 0.813      | 0.01324 | 0.0337      | 66               |
| 16   | 5279552                           | -0.614 | 2  | -0.918     | 0.01374 | 0.0119      | 100              |
| 17   | tacrine                           | -0.42  | 4  | -0.71      | 0.01466 | 0.0065      | 75               |
| 18   | emetine                           | -0.512 | 4  | -0.701     | 0.01671 | 0.2353      | 75               |
| 19   | mebutrolin                        | 0.28   | 4  | 0.698      | 0.01713 | 0.0104      | 75               |
| 20   | levomepromazine                   | 0.498  | 4  | 0.697      | 0.01753 | 0.1561      | 75               |
| 21   | dihydrostreptomycin               | 0.131  | 5  | 0.635      | 0.01852 | 0.0137      | 60               |
| 22   | withaferin A                      | 0.31   | 4  | 0.692      | 0.0188  | 0.2421      | 50               |
| 23   | isocorydine                       | 0.226  | 4  | 0.688      | 0.02005 | 0.0121      | 75               |
| 24   | diphepanil metilsulfate           | -0.342 | 5  | -0.618     | 0.02169 | 0.035       | 80               |
| 25   | STOCK1N-28457                     | -0.398 | 3  | -0.779     | 0.02217 | 0.0355      | 66               |
| 26   | furazolidone                      | 0.382  | 4  | 0.681      | 0.02226 | 0.0839      | 75               |
| 27   | PNU-0230031                       | -0.24  | 8  | -0.497     | 0.02383 | 0.0625      | 62               |
| 28   | CP-690334-01                      | 0.262  | 8  | 0.497      | 0.02399 | 0.1455      | 50               |
| 29   | melatonin                         | 0.398  | 4  | 0.676      | 0.02417 | 0.0321      | 75               |
| 30   | irinotecan                        | 0.583  | 3  | 0.769      | 0.0245  | 0.2909      | 66               |
| 31   | piperacillin                      | -0.396 | 5  | -0.609     | 0.02577 | 0.0325      | 60               |
| 32   | lycorine                          | -0.302 | 5  | -0.609     | 0.02597 | 0.2333      | 60               |
| 33   | 0317956-0000                      | -0.158 | 8  | -0.49      | 0.0274  | 0.1073      | 50               |
| 34   | NU-1025                           | -0.562 | 2  | -0.883     | 0.02744 | 0.0376      | 100              |
| 35   | indometacin                       | -0.377 | 8  | -0.489     | 0.0276  | 0.0217      | 62               |
| 36   | alvespimycin                      | -0.29  | 12 | -0.402     | 0.02948 | 0.2101      | 50               |
| 37   | terazosin                         | 0.454  | 4  | 0.658      | 0.03171 | 0.1124      | 75               |
| 38   | oxedrine                          | 0.367  | 4  | 0.652      | 0.03416 | 0.0273      | 75               |
| 39   | arecoline                         | 0.404  | 4  | 0.646      | 0.03776 | 0.0533      | 75               |
| 40   | meclocycline                      | 0.378  | 4  | 0.643      | 0.03949 | 0.05        | 75               |
| 41   | hemicholinium                     | -0.324 | 4  | -0.631     | 0.04502 | 0.0722      | 50               |
| 42   | ionomycin                         | 0.328  | 3  | 0.711      | 0.04697 | 0.1211      | 66               |
| 43   | cyproterone                       | 0.291  | 4  | 0.629      | 0.04729 | 0.064       | 50               |
| 44   | harmol                            | 0.428  | 4  | 0.625      | 0.04943 | 0.093       | 75               |
| 45   | isoxsuprine                       | -0.281 | 5  | -0.553     | 0.05529 | 0.0206      | 60               |
| 46   | MS-275                            | 0.253  | 2  | 0.834      | 0.05563 | 0.2035      | 50               |
| 47   | novobiocin                        | 0.258  | 9  | 0.421      | 0.05755 | 0.0692      | 55               |
| 48   | orciiprenaline                    | -0.412 | 4  | -0.611     | 0.05835 | 0.0286      | 75               |
| 49   | digoxin                           | -0.452 | 4  | -0.61      | 0.05928 | 0.1837      | 75               |
| 50   | etofenamate                       | 0.201  | 4  | 0.608      | 0.06045 | 0.0614      | 50               |
| 51   | puromycin                         | -0.475 | 4  | -0.604     | 0.06366 | 0.2537      | 75               |
| 52   | ouabain                           | -0.466 | 4  | -0.603     | 0.06461 | 0.1579      | 75               |
| 53   | glafenine                         | -0.444 | 4  | -0.601     | 0.06604 | 0.1521      | 75               |
| 54   | scopolamine                       | 0.227  | 4  | 0.599      | 0.06766 | 0.0606      | 50               |

|     |                     |        |   |        |         |        |    |
|-----|---------------------|--------|---|--------|---------|--------|----|
| 55  | cefalotin           | -0.408 | 4 | -0.597 | 0.06925 | 0.0704 | 75 |
| 56  | amoxapine           | -0.336 | 5 | -0.533 | 0.07287 | 0.1154 | 60 |
| 57  | gemfibrozil         | -0.259 | 5 | -0.533 | 0.07293 | 0.1053 | 60 |
| 58  | equilin             | 0.206  | 5 | 0.535  | 0.0733  | 0.1207 | 60 |
| 59  | 5194442             | 0.313  | 4 | 0.59   | 0.07454 | 0.1161 | 75 |
| 60  | metanephrine        | -0.371 | 5 | -0.53  | 0.0762  | 0.1083 | 60 |
| 61  | desipramine         | 0.224  | 4 | 0.588  | 0.07665 | 0.2579 | 50 |
| 62  | rolipram            | -0.39  | 4 | -0.588 | 0.0776  | 0.0592 | 75 |
| 63  | methotrexate        | 0.257  | 8 | 0.425  | 0.07792 | 0.2711 | 50 |
| 64  | proxiphylline       | -0.37  | 4 | -0.587 | 0.07834 | 0.1782 | 75 |
| 65  | albendazole         | -0.411 | 3 | -0.652 | 0.08375 | 0.1643 | 66 |
| 66  | ethosuximide        | -0.391 | 4 | -0.58  | 0.08494 | 0.0805 | 75 |
| 67  | cefepime            | 0.268  | 4 | 0.577  | 0.08582 | 0.0645 | 50 |
| 68  | exisulind           | -0.393 | 2 | -0.788 | 0.08764 | 0.069  | 50 |
| 69  | AG-012559           | -0.472 | 3 | -0.647 | 0.08875 | 0.0815 | 66 |
| 70  | vanoxerine          | 0.193  | 4 | 0.574  | 0.0892  | 0.2031 | 50 |
| 71  | 5707885             | 0.04   | 4 | 0.573  | 0.08976 | 0.3627 | 50 |
| 72  | depudecin           | 0.357  | 2 | 0.781  | 0.09682 | 0.075  | 50 |
| 73  | quinethazone        | -0.308 | 4 | -0.568 | 0.09734 | 0.2158 | 75 |
| 74  | chlortetracycline   | 0.332  | 5 | 0.512  | 0.09757 | 0.0107 | 60 |
| 75  | pentetic acid       | -0.324 | 5 | -0.508 | 0.09891 | 0.1063 | 60 |
| 76  | parthenolide        | 0.232  | 4 | 0.561  | 0.10151 | 0.4311 | 50 |
| 77  | (+/-)-catechin      | -0.23  | 4 | -0.563 | 0.10153 | 0.0641 | 50 |
| 78  | dicoumarol          | -0.306 | 6 | -0.465 | 0.10411 | 0.0333 | 50 |
| 79  | dicycloverine       | -0.34  | 5 | -0.504 | 0.10478 | 0.2137 | 60 |
| 80  | dioxybenzone        | 0.209  | 4 | 0.558  | 0.10519 | 0.1032 | 50 |
| 81  | triflupromazine     | 0.278  | 4 | 0.557  | 0.10581 | 0.2245 | 50 |
| 82  | estrone             | -0.316 | 4 | -0.56  | 0.10583 | 0.092  | 50 |
| 83  | dl-alpha tocopherol | 0.223  | 4 | 0.555  | 0.10768 | 0.0233 | 50 |
| 84  | denatonium benzoate | 0.136  | 4 | 0.553  | 0.11047 | 0.1513 | 50 |
| 85  | depropine           | 0.273  | 4 | 0.552  | 0.1109  | 0.1629 | 50 |
| 86  | pimethixene         | 0.372  | 3 | 0.624  | 0.11199 | 0.152  | 66 |
| 87  | (+)-chelidonium     | -0.261 | 4 | -0.552 | 0.11385 | 0.1308 | 50 |
| 88  | sisomicin           | 0.204  | 4 | 0.549  | 0.1144  | 0.038  | 50 |
| 89  | theobromine         | -0.284 | 4 | -0.552 | 0.11532 | 0.1317 | 50 |
| 90  | dilazep             | 0.177  | 5 | 0.498  | 0.11577 | 0.1677 | 60 |
| 91  | metoprolol          | 0.205  | 4 | 0.547  | 0.11747 | 0.1547 | 50 |
| 92  | nomegestrol         | 0.372  | 3 | 0.618  | 0.118   | 0.2046 | 66 |
| 93  | erastin             | 0.21   | 4 | 0.544  | 0.12097 | 0.2023 | 50 |
| 94  | valinomycin         | -0.286 | 4 | -0.547 | 0.12129 | 0.2429 | 50 |
| 95  | ethionamide         | -0.388 | 3 | -0.614 | 0.12367 | 0.1375 | 66 |
| 96  | chlorphenamine      | -0.221 | 4 | -0.543 | 0.12515 | 0.1123 | 50 |
| 97  | ascorbic acid       | -0.24  | 4 | -0.543 | 0.1255  | 0.1012 | 50 |
| 98  | dropropizine        | -0.312 | 4 | -0.542 | 0.12638 | 0.1547 | 50 |
| 99  | raubasine           | 0.243  | 4 | 0.539  | 0.12775 | 0.1667 | 50 |
| 100 | Prestwick-675       | -0.252 | 4 | -0.541 | 0.12801 | 0.4021 | 50 |
| 101 | piroxicam           | -0.254 | 4 | -0.54  | 0.12875 | 0.2222 | 50 |
| 102 | etoposide           | 0.298  | 4 | 0.538  | 0.12905 | 0.3795 | 50 |
| 103 | daunorubicin        | 0.324  | 4 | 0.536  | 0.13121 | 0.4293 | 50 |
| 104 | minaprine           | -0.335 | 5 | -0.485 | 0.13177 | 0.1698 | 60 |
| 105 | megestrol           | 0.186  | 4 | 0.535  | 0.13292 | 0.2546 | 50 |
| 106 | atractyloside       | 0.281  | 5 | 0.484  | 0.13498 | 0.4667 | 60 |
| 107 | oxymetazoline       | -0.304 | 4 | -0.535 | 0.13555 | 0.1325 | 50 |
| 108 | diphenhydramine     | 0.323  | 5 | 0.482  | 0.13868 | 0.4011 | 60 |
| 109 | tiapride            | 0.335  | 5 | 0.481  | 0.13926 | 0.0956 | 60 |
| 110 | Prestwick-857       | 0.272  | 4 | 0.527  | 0.14305 | 0.3226 | 50 |
| 111 | perphenazine        | 0.152  | 5 | 0.477  | 0.14621 | 0.4536 | 60 |
| 112 | clofilium tosylate  | -0.448 | 3 | -0.596 | 0.1467  | 0.1343 | 66 |
| 113 | cephaeline          | -0.367 | 5 | -0.473 | 0.1511  | 0.6807 | 60 |
| 114 | alprenolol          | -0.264 | 4 | -0.521 | 0.15341 | 0.1393 | 50 |
| 115 | rofecoxib           | 0.173  | 6 | 0.432  | 0.15391 | 0.1314 | 50 |

|     |                          |        |   |        |         |        |    |
|-----|--------------------------|--------|---|--------|---------|--------|----|
| 116 | amprolium                | -0.346 | 5 | -0.468 | 0.15855 | 0.2473 | 60 |
| 117 | promethazine             | 0.254  | 4 | 0.515  | 0.15896 | 0.2292 | 50 |
| 118 | piracetam                | -0.272 | 4 | -0.517 | 0.15944 | 0.1829 | 50 |
| 119 | SR-95531                 | -0.267 | 4 | -0.516 | 0.16137 | 0.1902 | 50 |
| 120 | desoxycortone            | 0.279  | 4 | 0.513  | 0.16191 | 0.1    | 50 |
| 121 | niridazole               | -0.303 | 4 | -0.514 | 0.16463 | 0.1858 | 50 |
| 122 | colistin                 | -0.339 | 4 | -0.512 | 0.16774 | 0.3154 | 50 |
| 123 | lanatoside C             | -0.236 | 6 | -0.424 | 0.17137 | 0.3192 | 50 |
| 124 | tetrandrine              | 0.073  | 4 | 0.506  | 0.17329 | 0.3824 | 50 |
| 125 | difenidol                | -0.402 | 3 | -0.577 | 0.17555 | 0.2944 | 66 |
| 126 | penbutolol               | 0.329  | 3 | 0.577  | 0.17773 | 0.4124 | 66 |
| 127 | colchicine               | -0.264 | 6 | -0.419 | 0.18146 | 0.2535 | 50 |
| 128 | ciprofibrate             | 0.307  | 4 | 0.5    | 0.18264 | 0.1908 | 50 |
| 129 | pseudopelletierine       | 0.169  | 4 | 0.499  | 0.18355 | 0.156  | 50 |
| 130 | cinoxacin                | -0.276 | 4 | -0.497 | 0.1905  | 0.2611 | 50 |
| 131 | pirindole                | 0.204  | 3 | 0.569  | 0.19107 | 0.2061 | 66 |
| 132 | piperacetazine           | 0.231  | 4 | 0.49   | 0.19875 | 0.2914 | 50 |
| 133 | atracurium besilate      | 0.348  | 3 | 0.562  | 0.20277 | 0.422  | 66 |
| 134 | oxyphenbutazone          | 0.235  | 4 | 0.487  | 0.20486 | 0.4093 | 50 |
| 135 | dobutamine               | 0.194  | 4 | 0.484  | 0.20973 | 0.2126 | 50 |
| 136 | bacitracin               | -0.231 | 3 | -0.558 | 0.2102  | 0.2242 | 66 |
| 137 | primidone                | -0.225 | 4 | -0.482 | 0.21741 | 0.2826 | 50 |
| 138 | milrinone                | -0.396 | 3 | -0.553 | 0.21811 | 0.5    | 66 |
| 139 | securinine               | -0.362 | 4 | -0.479 | 0.22382 | 0.3861 | 50 |
| 140 | biotin                   | -0.213 | 3 | -0.546 | 0.23155 | 0.1307 | 66 |
| 141 | prazosin                 | 0.06   | 6 | 0.396  | 0.23209 | 0.1936 | 50 |
| 142 | L-methionine sulfoximine | -0.35  | 4 | -0.472 | 0.23885 | 0.1657 | 50 |
| 143 | folic acid               | 0.331  | 4 | 0.469  | 0.24061 | 0.375  | 50 |
| 144 | domperidone              | 0.255  | 4 | 0.465  | 0.24998 | 0.1749 | 50 |
| 145 | brinzolamide             | -0.169 | 4 | -0.467 | 0.25035 | 0.2757 | 50 |
| 146 | pipenzolate bromide      | 0.2    | 4 | 0.464  | 0.25175 | 0.2555 | 50 |
| 147 | digitoxigenin            | -0.18  | 4 | -0.466 | 0.25383 | 0.402  | 50 |
| 148 | diprophylline            | -0.22  | 5 | -0.422 | 0.25619 | 0.3444 | 60 |
| 149 | methoxsalen              | -0.14  | 3 | -0.533 | 0.25751 | 0.2069 | 66 |
| 150 | lasalocid                | 0.331  | 4 | 0.461  | 0.25815 | 0.6373 | 50 |
| 151 | metitepine               | 0.071  | 4 | 0.461  | 0.25847 | 0.4264 | 50 |
| 152 | velnacrine               | 0.286  | 4 | 0.457  | 0.26808 | 0.1958 | 50 |
| 153 | etifenin                 | 0.024  | 4 | 0.456  | 0.26983 | 0.2246 | 50 |
| 154 | trapidil                 | 0.28   | 3 | 0.528  | 0.26991 | 0.4333 | 66 |
| 155 | convolamine              | 0.27   | 4 | 0.451  | 0.28286 | 0.189  | 50 |
| 156 | PNU-0251126              | 0.102  | 6 | 0.376  | 0.28364 | 0.5    | 50 |
| 157 | methocarbamol            | -0.138 | 3 | -0.521 | 0.28371 | 0.3351 | 66 |
| 158 | butein                   | 0.253  | 2 | 0.623  | 0.28437 | 0.2983 | 50 |
| 159 | cinchonidine             | -0.216 | 4 | -0.447 | 0.29762 | 0.2397 | 50 |
| 160 | sulfanilamide            | -0.321 | 4 | -0.446 | 0.30084 | 0.2611 | 50 |
| 161 | suramin sodium           | 0.053  | 4 | 0.443  | 0.30241 | 0.3082 | 50 |
| 162 | diperodon                | -0.383 | 3 | -0.51  | 0.30595 | 0.2713 | 66 |
| 163 | cyclobenzaprine          | 0.287  | 4 | 0.441  | 0.30828 | 0.5417 | 50 |
| 164 | canrenoic acid           | 0.119  | 4 | 0.44   | 0.31162 | 0.3053 | 50 |
| 165 | bupropion                | 0.115  | 4 | 0.44   | 0.31214 | 0.338  | 50 |
| 166 | ethaverine               | -0.262 | 4 | -0.441 | 0.31397 | 0.3822 | 50 |
| 167 | dyclonine                | -0.254 | 4 | -0.438 | 0.32085 | 0.3015 | 50 |
| 168 | nimesulide               | -0.147 | 4 | -0.433 | 0.33621 | 0.3161 | 50 |
| 169 | parbendazole             | -0.263 | 4 | -0.432 | 0.33792 | 0.3646 | 50 |
| 170 | fosfosal                 | -0.311 | 4 | -0.432 | 0.3392  | 0.3392 | 50 |
| 171 | loxapine                 | -0.329 | 4 | -0.431 | 0.34025 | 0.2419 | 50 |
| 172 | chlorzoxazone            | -0.16  | 4 | -0.431 | 0.34067 | 0.6332 | 50 |
| 173 | naringenin               | 0.289  | 4 | 0.429  | 0.34132 | 0.7075 | 50 |
| 174 | idazoxan                 | -0.223 | 4 | -0.428 | 0.34779 | 0.4022 | 50 |
| 175 | 5182598                  | -0.373 | 2 | -0.584 | 0.34795 | 0.6478 | 50 |
| 176 | PHA-00846566E            | -0.231 | 3 | -0.493 | 0.34833 | 0.3352 | 66 |

|     |                             |        |   |        |         |        |    |
|-----|-----------------------------|--------|---|--------|---------|--------|----|
| 177 | karakoline                  | 0.17   | 6 | 0.353  | 0.35173 | 0.5508 | 50 |
| 178 | ampicillin                  | 0.268  | 4 | 0.425  | 0.3525  | 0.3726 | 50 |
| 179 | xylometazoline              | -0.316 | 4 | -0.427 | 0.35312 | 0.4917 | 50 |
| 180 | perhexiline                 | -0.235 | 4 | -0.427 | 0.35402 | 0.4706 | 50 |
| 181 | nitrofuraf                  | 0.21   | 4 | 0.423  | 0.35883 | 0.3726 | 50 |
| 182 | 5155877                     | 0.245  | 4 | 0.419  | 0.36943 | 0.5125 | 50 |
| 183 | helveticoside               | 0.028  | 6 | 0.344  | 0.38203 | 0.8468 | 50 |
| 184 | dorzolamide                 | -0.265 | 4 | -0.416 | 0.38376 | 0.4315 | 50 |
| 185 | oxolamine                   | 0.117  | 4 | 0.411  | 0.39426 | 0.6209 | 50 |
| 186 | fusaric acid                | -0.303 | 4 | -0.412 | 0.39561 | 0.5465 | 50 |
| 187 | fluoxetine                  | 0.285  | 4 | 0.409  | 0.39993 | 0.5729 | 50 |
| 188 | quinisocaine                | -0.186 | 4 | -0.411 | 0.40015 | 0.36   | 50 |
| 189 | meteneprost                 | 0.244  | 4 | 0.405  | 0.41192 | 0.7609 | 50 |
| 190 | pridinol                    | -0.267 | 4 | -0.406 | 0.41706 | 0.4546 | 50 |
| 191 | naftifine                   | -0.318 | 4 | -0.405 | 0.41932 | 0.4837 | 50 |
| 192 | cicloheximide               | -0.285 | 4 | -0.402 | 0.42929 | 0.6519 | 50 |
| 193 | methapyrilene               | -0.144 | 4 | -0.401 | 0.43138 | 0.4637 | 50 |
| 194 | beta-escin                  | -0.245 | 6 | -0.329 | 0.43636 | 0.4711 | 50 |
| 195 | pivmecillinam               | -0.072 | 4 | -0.399 | 0.43697 | 0.5691 | 50 |
| 196 | flunisolide                 | -0.273 | 6 | -0.329 | 0.4391  | 0.5118 | 50 |
| 197 | epiandrosterone             | -0.172 | 4 | -0.398 | 0.44099 | 0.5672 | 50 |
| 198 | sulfapyridine               | -0.158 | 4 | -0.397 | 0.44224 | 0.4071 | 50 |
| 199 | kaempferol                  | 0.243  | 4 | 0.395  | 0.4461  | 0.5    | 50 |
| 200 | blebbistatin                | -0.351 | 2 | -0.524 | 0.45244 | 0.696  | 50 |
| 201 | diloxanide                  | 0.226  | 4 | 0.392  | 0.45615 | 0.6919 | 50 |
| 202 | tubocurarine chloride       | -0.172 | 4 | -0.391 | 0.46166 | 0.4822 | 50 |
| 203 | ciclacillin                 | -0.24  | 4 | -0.389 | 0.46828 | 0.4581 | 50 |
| 204 | hesperidin                  | -0.264 | 4 | -0.389 | 0.46904 | 0.4343 | 50 |
| 205 | clofibrate                  | -0.248 | 2 | -0.511 | 0.47759 | 0.3129 | 50 |
| 206 | methylbenzethonium chloride | -0.274 | 6 | -0.319 | 0.47829 | 0.562  | 50 |
| 207 | ketorolac                   | 0.081  | 4 | 0.384  | 0.47998 | 0.4746 | 50 |
| 208 | ondansetron                 | 0.122  | 4 | 0.382  | 0.48674 | 0.6872 | 50 |
| 209 | zoxazolamine                | -0.175 | 4 | -0.384 | 0.48688 | 0.6717 | 50 |
| 210 | bisoprolol                  | -0.186 | 4 | -0.384 | 0.48718 | 0.4807 | 50 |
| 211 | buspirone                   | -0.24  | 4 | -0.383 | 0.48917 | 0.4329 | 50 |
| 212 | clorsulon                   | -0.042 | 4 | -0.383 | 0.48951 | 0.6667 | 50 |
| 213 | colecalfiferol              | -0.253 | 4 | -0.382 | 0.49054 | 0.4239 | 50 |
| 214 | thiethylperazine            | -0.146 | 4 | -0.382 | 0.49054 | 0.3769 | 50 |
| 215 | 5248896                     | -0.49  | 2 | -0.5   | 0.49964 | 0.7368 | 50 |
| 216 | gliquidone                  | 0.218  | 4 | 0.378  | 0.50138 | 0.4114 | 50 |
| 217 | tiratricol                  | -0.324 | 4 | -0.378 | 0.50522 | 0.5529 | 50 |
| 218 | 5224221                     | -0.384 | 2 | -0.498 | 0.50781 | 0.6842 | 50 |
| 219 | estriol                     | -0.317 | 4 | -0.377 | 0.50964 | 0.7376 | 50 |
| 220 | mesoridazine                | -0.144 | 4 | -0.377 | 0.51069 | 0.5027 | 50 |
| 221 | salsolidin                  | -0.278 | 4 | -0.376 | 0.51189 | 0.5584 | 50 |
| 222 | alcuronium chloride         | -0.411 | 2 | -0.497 | 0.51243 | 0.5876 | 50 |
| 223 | 5230742                     | -0.253 | 2 | -0.495 | 0.51958 | 0.6503 | 50 |
| 224 | metaraminol                 | -0.221 | 4 | -0.373 | 0.52171 | 0.5419 | 50 |
| 225 | gabapentin                  | -0.274 | 4 | -0.371 | 0.52895 | 0.5333 | 50 |
| 226 | mepacrine                   | -0.394 | 2 | -0.492 | 0.53145 | 0.4167 | 50 |
| 227 | chenodeoxycholic acid       | 0.236  | 4 | 0.369  | 0.53309 | 0.7857 | 50 |
| 228 | oxybutynin                  | -0.263 | 4 | -0.37  | 0.53423 | 0.6025 | 50 |
| 229 | florfenicol                 | -0.265 | 4 | -0.367 | 0.54457 | 0.5346 | 50 |
| 230 | ursolic acid                | -0.24  | 4 | -0.365 | 0.55271 | 0.6715 | 50 |
| 231 | norethisterone              | -0.331 | 4 | -0.363 | 0.55979 | 0.6646 | 50 |
| 232 | hymecromone                 | 0.15   | 4 | 0.361  | 0.56116 | 0.6301 | 50 |
| 233 | 0198306-0000                | 0.036  | 4 | 0.359  | 0.56643 | 0.5441 | 50 |
| 234 | oxybenzone                  | 0.248  | 4 | 0.359  | 0.56643 | 0.7412 | 50 |
| 235 | homosalate                  | -0.29  | 4 | -0.36  | 0.57005 | 0.5515 | 50 |
| 236 | spaqlumic acid              | -0.365 | 2 | -0.481 | 0.57253 | 0.6559 | 50 |

|     |                                |        |   |        |         |        |     |
|-----|--------------------------------|--------|---|--------|---------|--------|-----|
| 237 | CP-863187                      | 0.21   | 4 | 0.356  | 0.57682 | 0.662  | 50  |
| 238 | retrorsine                     | -0.145 | 4 | -0.357 | 0.57819 | 0.5562 | 50  |
| 239 | dydrogesterone                 | -0.268 | 4 | -0.357 | 0.57962 | 0.5127 | 50  |
| 240 | mephenytoin                    | 0.032  | 4 | 0.355  | 0.58034 | 0.6509 | 50  |
| 241 | phensuximide                   | 0.083  | 4 | 0.355  | 0.58151 | 0.6274 | 50  |
| 242 | racecadotril                   | -0.153 | 4 | -0.356 | 0.58298 | 0.5577 | 50  |
| 243 | 4,5-dianilinophthalimide       | -0.232 | 2 | -0.477 | 0.58617 | 0.7989 | 50  |
| 244 | chloramphenicol                | -0.208 | 4 | -0.354 | 0.58732 | 0.6667 | 50  |
| 245 | pargyline                      | -0.271 | 4 | -0.352 | 0.5951  | 0.8054 | 50  |
| 246 | cyclic adenosine monophosphate | 0.176  | 4 | 0.351  | 0.59693 | 0.7595 | 50  |
| 247 | benfluorex                     | 0.037  | 4 | 0.35   | 0.59743 | 0.6163 | 50  |
| 248 | isosorbide                     | -0.087 | 4 | -0.351 | 0.59872 | 0.5489 | 50  |
| 249 | piperine                       | 0.229  | 4 | 0.35   | 0.5988  | 0.5563 | 50  |
| 250 | tetramisole                    | 0.043  | 4 | 0.349  | 0.60079 | 0.4706 | 50  |
| 251 | etamivan                       | -0.284 | 4 | -0.35  | 0.60325 | 0.71   | 50  |
| 252 | suloctidil                     | -0.292 | 4 | -0.349 | 0.60508 | 0.7065 | 50  |
| 253 | 5253409                        | -0.062 | 2 | -0.472 | 0.60575 | 0.4359 | 50  |
| 254 | nimodipine                     | 0.197  | 4 | 0.347  | 0.60944 | 0.7037 | 50  |
| 255 | methazolamide                  | -0.275 | 4 | -0.346 | 0.61613 | 0.7816 | 50  |
| 256 | canadine                       | 0.211  | 4 | 0.345  | 0.61682 | 0.865  | 50  |
| 257 | cromoglicic acid               | -0.331 | 2 | -0.466 | 0.62563 | 0.6188 | 50  |
| 258 | pepstatin                      | 0.066  | 4 | 0.342  | 0.62573 | 0.6111 | 50  |
| 259 | benzylpenicillin               | -0.243 | 4 | -0.343 | 0.62919 | 0.6464 | 50  |
| 260 | arachidonyltrifluoromethane    | -0.338 | 2 | -0.462 | 0.64195 | 0.634  | 50  |
| 261 | esculin                        | -0.212 | 4 | -0.337 | 0.64959 | 0.7225 | 50  |
| 262 | bezafibrate                    | -0.251 | 4 | -0.336 | 0.65102 | 0.7673 | 50  |
| 263 | quinostatin                    | -0.334 | 2 | -0.459 | 0.6513  | 0.8626 | 50  |
| 264 | (-)-isoprenaline               | -0.074 | 4 | -0.336 | 0.65159 | 0.5571 | 50  |
| 265 | thiostrepton                   | -0.238 | 4 | -0.333 | 0.66309 | 0.75   | 50  |
| 266 | nialamide                      | -0.18  | 4 | -0.332 | 0.66653 | 0.7761 | 50  |
| 267 | chloropyrazine                 | -0.163 | 4 | -0.327 | 0.68108 | 0.8442 | 50  |
| 268 | cetirizine                     | -0.295 | 4 | -0.327 | 0.68153 | 0.8599 | 50  |
| 269 | azlocillin                     | -0.17  | 4 | -0.325 | 0.68692 | 0.7598 | 50  |
| 270 | prasterone                     | -0.133 | 4 | -0.324 | 0.69182 | 0.664  | 50  |
| 271 | chloroquine                    | -0.145 | 4 | -0.323 | 0.69502 | 0.7273 | 50  |
| 272 | trichlormethiazide             | -0.182 | 4 | -0.32  | 0.70584 | 0.75   | 50  |
| 273 | molindone                      | -0.26  | 4 | -0.318 | 0.71046 | 0.8385 | 50  |
| 274 | papaverine                     | -0.232 | 4 | -0.318 | 0.71259 | 0.6793 | 50  |
| 275 | imatinib                       | 0.24   | 2 | 0.421  | 0.76592 | 0.8704 | 50  |
| 276 | mercaptopurine                 | -0.09  | 2 | -0.419 | 0.77132 | 0.8082 | 50  |
| 277 | W-13                           | 0.221  | 2 | 0.4    | 0.81995 | 0.8834 | 50  |
| 278 | STOCK1N-35874                  | 0.178  | 2 | 0.356  | 0.91085 | 0.9565 | 50  |
| 279 | BW-B70C                        | 0.81   | 1 | 0.999  | ---     | ---    | 100 |
| 280 | tyrphostin AG-1478             | 0.707  | 1 | 0.996  | ---     | ---    | 100 |
| 281 | cantharidin                    | -0.775 | 1 | -0.99  | ---     | ---    | 100 |
| 282 | demecolcine                    | -0.761 | 1 | -0.987 | ---     | ---    | 100 |
| 283 | celastrol                      | -0.749 | 1 | -0.985 | ---     | ---    | 100 |
| 284 | cytochalasin B                 | -0.72  | 1 | -0.978 | ---     | ---    | 100 |
| 285 | MG-132                         | -0.693 | 1 | -0.969 | ---     | ---    | 100 |
| 286 | HNMPA-(AM)3                    | 0.574  | 1 | 0.966  | ---     | ---    | 100 |
| 287 | tioguanine                     | 0.561  | 1 | 0.961  | ---     | ---    | 100 |
| 288 | dopamine                       | -0.66  | 1 | -0.956 | ---     | ---    | 100 |
| 289 | (-)-catechin                   | -0.652 | 1 | -0.953 | ---     | ---    | 100 |
| 290 | gefitinib                      | 0.53   | 1 | 0.947  | ---     | ---    | 100 |
| 291 | decitabine                     | 0.526  | 1 | 0.944  | ---     | ---    | 100 |
| 292 | 5213008                        | -0.605 | 1 | -0.93  | ---     | ---    | 100 |
| 293 | 5666823                        | 0.487  | 1 | 0.924  | ---     | ---    | 100 |
| 294 | 1,5-isouquinolinediol          | 0.477  | 1 | 0.919  | ---     | ---    | 100 |
| 295 | tomelukast                     | 0.476  | 1 | 0.919  | ---     | ---    | 100 |

|     |                    |        |   |        |     |     |     |
|-----|--------------------|--------|---|--------|-----|-----|-----|
| 296 | PHA-00665752       | -0.535 | 1 | -0.896 | --- | --- | 100 |
| 297 | U0125              | 0.347  | 1 | 0.854  | --- | --- | 100 |
| 298 | tyrphostin AG-825  | 0      | 1 | 0.834  | --- | --- | 0   |
| 299 | 2-deoxy-D-glucose  | 0      | 1 | -0.806 | --- | --- | 0   |
| 300 | camptothecin       | 0.141  | 3 | 0.804  | --- | --- | 33  |
| 301 | topiramate         | 0      | 1 | -0.8   | --- | --- | 0   |
| 302 | phenanthridinone   | 0      | 1 | -0.779 | --- | --- | 0   |
| 303 | alfaxalone         | 0.173  | 3 | 0.749  | --- | --- | 33  |
| 304 | reserpine          | 0.121  | 3 | 0.744  | --- | --- | 33  |
| 305 | (-)-atenolol       | 0.068  | 4 | 0.744  | --- | --- | 25  |
| 306 | quinpirole         | 0      | 4 | -0.744 | --- | --- | 0   |
| 307 | thioguanosine      | 0      | 4 | 0.743  | --- | --- | 0   |
| 308 | 12,13-EODE         | 0      | 1 | -0.74  | --- | --- | 0   |
| 309 | betulin            | -0.148 | 3 | -0.734 | --- | --- | 33  |
| 310 | Prestwick-983      | 0      | 3 | -0.732 | --- | --- | 0   |
| 311 | 5186223            | 0      | 1 | -0.731 | --- | --- | 0   |
| 312 | disopyramide       | -0.165 | 4 | -0.729 | --- | --- | 25  |
| 313 | oxamic acid        | 0      | 1 | 0.722  | --- | --- | 0   |
| 314 | sulmazole          | -0.229 | 3 | -0.72  | --- | --- | 33  |
| 315 | DL-PPMP            | 0      | 1 | -0.719 | --- | --- | 0   |
| 316 | 5149715            | 0      | 1 | -0.718 | --- | --- | 0   |
| 317 | timolol            | -0.109 | 4 | -0.713 | --- | --- | 25  |
| 318 | dexverapamil       | 0      | 1 | 0.712  | --- | --- | 0   |
| 319 | calmidazolium      | 0      | 2 | 0.705  | --- | --- | 0   |
| 320 | HC toxin           | 0      | 1 | 0.698  | --- | --- | 0   |
| 321 | apigenin           | 0      | 4 | 0.691  | --- | --- | 0   |
| 322 | 5162773            | 0      | 1 | 0.69   | --- | --- | 0   |
| 323 | trifluridine       | 0      | 4 | 0.689  | --- | --- | 0   |
| 324 | viomycin           | 0      | 4 | -0.687 | --- | --- | 0   |
| 325 | vigabatrin         | -0.175 | 3 | -0.686 | --- | --- | 33  |
| 326 | piperidolate       | 0      | 3 | 0.683  | --- | --- | 0   |
| 327 | Prestwick-691      | -0.132 | 3 | -0.682 | --- | --- | 33  |
| 328 | oligomycin         | 0      | 1 | -0.68  | --- | --- | 0   |
| 329 | trihexyphenidyl    | -0.171 | 3 | -0.674 | --- | --- | 33  |
| 330 | terfenadine        | 0      | 3 | 0.672  | --- | --- | 0   |
| 331 | phenoxybenzamine   | 0      | 4 | 0.672  | --- | --- | 0   |
| 332 | tomatidine         | 0.11   | 4 | 0.67   | --- | --- | 25  |
| 333 | isoflupredone      | 0      | 3 | -0.659 | --- | --- | 0   |
| 334 | 5151277            | 0      | 1 | -0.658 | --- | --- | 0   |
| 335 | dextromethorphan   | 0.124  | 4 | 0.658  | --- | --- | 25  |
| 336 | 5140203            | 0      | 1 | 0.655  | --- | --- | 0   |
| 337 | astemizole         | 0.136  | 5 | 0.655  | --- | --- | 20  |
| 338 | sanguinarine       | 0      | 2 | 0.654  | --- | --- | 0   |
| 339 | 5186324            | 0      | 1 | -0.653 | --- | --- | 0   |
| 340 | H-7                | 0      | 4 | 0.653  | --- | --- | 0   |
| 341 | cortisone          | 0      | 3 | 0.651  | --- | --- | 0   |
| 342 | doxorubicin        | 0.191  | 3 | 0.647  | --- | --- | 33  |
| 343 | felbinac           | -0.124 | 4 | -0.646 | --- | --- | 25  |
| 344 | clebopride         | -0.108 | 4 | -0.646 | --- | --- | 25  |
| 345 | pararosaniline     | 0      | 1 | 0.645  | --- | --- | 0   |
| 346 | fasudil            | 0      | 2 | -0.642 | --- | --- | 0   |
| 347 | lidoflazine        | -0.136 | 3 | -0.642 | --- | --- | 33  |
| 348 | MK-886             | 0      | 2 | -0.64  | --- | --- | 0   |
| 349 | trimipramine       | 0.15   | 4 | 0.638  | --- | --- | 25  |
| 350 | nizatidine         | -0.119 | 4 | -0.635 | --- | --- | 25  |
| 351 | norcyclobenzaprine | 0.09   | 4 | 0.634  | --- | --- | 25  |
| 352 | 5109870            | 0      | 1 | 0.634  | --- | --- | 0   |
| 353 | clobetasol         | 0.153  | 3 | 0.633  | --- | --- | 33  |
| 354 | phenazone          | -0.142 | 3 | -0.63  | --- | --- | 33  |
| 355 | biperiden          | 0      | 5 | -0.629 | --- | --- | 0   |
| 356 | clorgiline         | 0.115  | 4 | 0.629  | --- | --- | 25  |

|     |                       |        |   |        |     |     |    |
|-----|-----------------------|--------|---|--------|-----|-----|----|
| 357 | methylprednisolone    | 0.109  | 4 | 0.629  | --- | --- | 25 |
| 358 | phenyl biguanide      | 0      | 1 | -0.628 | --- | --- | 0  |
| 359 | splitomicin           | 0      | 1 | -0.627 | --- | --- | 0  |
| 360 | 5114445               | 0      | 1 | 0.626  | --- | --- | 0  |
| 361 | sulindac sulfide      | 0      | 1 | -0.626 | --- | --- | 0  |
| 362 | menadione             | 0      | 2 | 0.625  | --- | --- | 0  |
| 363 | tobramycin            | 0.097  | 4 | 0.625  | --- | --- | 25 |
| 364 | thiamphenicol         | 0      | 5 | -0.624 | --- | --- | 0  |
| 365 | fisetin               | 0      | 1 | 0.624  | --- | --- | 0  |
| 366 | STOCK1N-35696         | 0      | 2 | -0.621 | --- | --- | 0  |
| 367 | remoxipride           | 0.1    | 4 | 0.62   | --- | --- | 25 |
| 368 | amiodarone            | 0.191  | 5 | 0.617  | --- | --- | 40 |
| 369 | ticarcillin           | 0.208  | 3 | 0.616  | --- | --- | 33 |
| 370 | oxytetracycline       | 0      | 3 | 0.615  | --- | --- | 0  |
| 371 | dimethyloxalylglycine | 0      | 1 | -0.615 | --- | --- | 0  |
| 372 | mimosine              | 0      | 3 | -0.613 | --- | --- | 0  |
| 373 | ifenprodil            | 0      | 4 | 0.612  | --- | --- | 0  |
| 374 | scriptaid             | 0.11   | 3 | 0.612  | --- | --- | 33 |
| 375 | metergoline           | 0.091  | 4 | 0.609  | --- | --- | 25 |
| 376 | indoprofen            | -0.104 | 4 | -0.607 | --- | --- | 25 |
| 377 | carbimazole           | 0      | 3 | -0.607 | --- | --- | 0  |
| 378 | F0447-0125            | 0.078  | 4 | 0.606  | --- | --- | 25 |
| 379 | iopamidol             | -0.164 | 4 | -0.606 | --- | --- | 25 |
| 380 | droperidol            | 0.109  | 4 | 0.605  | --- | --- | 25 |
| 381 | Gly-His-Lys           | 0      | 3 | -0.605 | --- | --- | 0  |
| 382 | halofantrine          | 0      | 3 | -0.603 | --- | --- | 0  |
| 383 | betaxolol             | 0.207  | 4 | 0.602  | --- | --- | 25 |
| 384 | 5286656               | 0      | 1 | 0.599  | --- | --- | 0  |
| 385 | phthalylsulfathiazole | 0.082  | 5 | 0.599  | --- | --- | 20 |
| 386 | piperlongumine        | 0      | 2 | 0.599  | --- | --- | 0  |
| 387 | xylazine              | 0.116  | 4 | 0.595  | --- | --- | 25 |
| 388 | isomethoptene         | 0      | 4 | -0.592 | --- | --- | 0  |
| 389 | 8-azaquanine          | 0      | 4 | 0.591  | --- | --- | 0  |
| 390 | selegiline            | 0      | 4 | 0.588  | --- | --- | 0  |
| 391 | medrysone             | 0.071  | 6 | 0.585  | --- | --- | 16 |
| 392 | AH-6809               | 0      | 2 | -0.585 | --- | --- | 0  |
| 393 | thiamazole            | -0.06  | 6 | -0.584 | --- | --- | 16 |
| 394 | cefalonium            | 0.137  | 3 | 0.583  | --- | --- | 33 |
| 395 | fenoterol             | 0      | 3 | 0.582  | --- | --- | 0  |
| 396 | exemestane            | 0      | 1 | 0.582  | --- | --- | 0  |
| 397 | corbadrine            | 0      | 4 | 0.58   | --- | --- | 0  |
| 398 | furosemide            | -0.091 | 4 | -0.579 | --- | --- | 25 |
| 399 | valdecoxib            | 0      | 3 | -0.578 | --- | --- | 0  |
| 400 | artemisinin           | 0      | 3 | 0.578  | --- | --- | 0  |
| 401 | strophanthidin        | -0.128 | 4 | -0.577 | --- | --- | 25 |
| 402 | DL-thiorphan          | 0      | 2 | 0.577  | --- | --- | 0  |
| 403 | azacitidine           | 0      | 3 | 0.576  | --- | --- | 0  |
| 404 | verteporfin           | 0      | 3 | 0.576  | --- | --- | 0  |
| 405 | homochlorcyclizine    | 0.157  | 4 | 0.572  | --- | --- | 25 |
| 406 | ebesen                | 0      | 3 | 0.571  | --- | --- | 0  |
| 407 | ivermectin            | 0.133  | 5 | 0.568  | --- | --- | 20 |
| 408 | spiperone             | 0      | 2 | 0.565  | --- | --- | 0  |
| 409 | CP-645525-01          | 0      | 3 | 0.564  | --- | --- | 0  |
| 410 | copper sulfate        | 0      | 4 | -0.562 | --- | --- | 0  |
| 411 | 5152487               | 0      | 1 | 0.561  | --- | --- | 0  |
| 412 | cloxacillin           | -0.132 | 4 | -0.56  | --- | --- | 25 |
| 413 | tracazolate           | 0.134  | 4 | 0.56   | --- | --- | 25 |
| 414 | iloprost              | -0.19  | 3 | -0.559 | --- | --- | 33 |
| 415 | MG-262                | -0.278 | 3 | -0.558 | --- | --- | 33 |
| 416 | chlorambucil          | 0.127  | 4 | 0.558  | --- | --- | 25 |
| 417 | chlorphenesin         | -0.089 | 4 | -0.558 | --- | --- | 25 |

|     |                                 |        |   |        |     |     |    |
|-----|---------------------------------|--------|---|--------|-----|-----|----|
| 418 | 6-azathymine                    | 0      | 4 | 0.557  | --- | --- | 0  |
| 419 | mebendazole                     | 0      | 5 | 0.556  | --- | --- | 0  |
| 420 | cycloserine                     | 0.014  | 4 | 0.556  | --- | --- | 25 |
| 421 | bethanechol                     | -0.15  | 4 | -0.55  | --- | --- | 25 |
| 422 | 15(S)-15-methylprostaglandin E2 | -0.115 | 4 | -0.549 | --- | --- | 25 |
| 423 | demecarium bromide              | 0      | 4 | -0.549 | --- | --- | 0  |
| 424 | dipyridamole                    | 0.071  | 6 | 0.547  | --- | --- | 16 |
| 425 | 3-aminobenzamide                | 0      | 1 | -0.546 | --- | --- | 0  |
| 426 | 5252917                         | 0      | 2 | -0.543 | --- | --- | 0  |
| 427 | rottlerin                       | 0      | 3 | 0.543  | --- | --- | 0  |
| 428 | clopamide                       | 0      | 4 | -0.541 | --- | --- | 0  |
| 429 | benzocaine                      | -0.041 | 4 | -0.539 | --- | --- | 25 |
| 430 | cloperastine                    | 0.076  | 6 | 0.539  | --- | --- | 16 |
| 431 | amoxicillin                     | 0.056  | 4 | 0.538  | --- | --- | 25 |
| 432 | coralyne                        | 0      | 4 | 0.537  | --- | --- | 0  |
| 433 | tacrolimus                      | -0.256 | 3 | -0.535 | --- | --- | 33 |
| 434 | citalopram                      | 0      | 4 | -0.534 | --- | --- | 0  |
| 435 | thiocolchicoside                | 0      | 4 | 0.533  | --- | --- | 0  |
| 436 | sitosterol                      | 0      | 4 | 0.531  | --- | --- | 0  |
| 437 | Y-27632                         | 0      | 2 | -0.531 | --- | --- | 0  |
| 438 | oxybuprocaine                   | 0.096  | 4 | 0.531  | --- | --- | 25 |
| 439 | lisinopril                      | 0      | 3 | 0.53   | --- | --- | 0  |
| 440 | chlorcyclizine                  | 0.151  | 6 | 0.53   | --- | --- | 33 |
| 441 | niclosamide                     | 0.1    | 5 | 0.53   | --- | --- | 20 |
| 442 | nilutamide                      | 0      | 4 | -0.529 | --- | --- | 0  |
| 443 | syrosingopine                   | -0.012 | 4 | 0.529  | --- | --- | 25 |
| 444 | nortriptyline                   | 0.176  | 4 | 0.529  | --- | --- | 25 |
| 445 | nisoxetine                      | -0.155 | 4 | -0.528 | --- | --- | 25 |
| 446 | ikarugamycin                    | 0.194  | 3 | 0.527  | --- | --- | 33 |
| 447 | salsolinol                      | -0.12  | 3 | -0.527 | --- | --- | 33 |
| 448 | N-acetyl-L-aspartic acid        | -0.093 | 4 | 0.526  | --- | --- | 0  |
| 449 | oxetacaine                      | 0      | 5 | 0.525  | --- | --- | 0  |
| 450 | GW-8510                         | 0      | 4 | 0.525  | --- | --- | 0  |
| 451 | hydrochlorothiazide             | 0      | 5 | -0.524 | --- | --- | 0  |
| 452 | bufexamac                       | 0      | 4 | 0.522  | --- | --- | 0  |
| 453 | phenazopyridine                 | 0.161  | 4 | 0.521  | --- | --- | 25 |
| 454 | flupentixol                     | 0.155  | 4 | 0.52   | --- | --- | 25 |
| 455 | josamycin                       | -0.053 | 5 | -0.52  | --- | --- | 40 |
| 456 | isoetarine                      | 0      | 4 | 0.52   | --- | --- | 0  |
| 457 | N-phenylanthranilic acid        | 0      | 1 | 0.519  | --- | --- | 0  |
| 458 | vinblastine                     | 0      | 3 | -0.518 | --- | --- | 0  |
| 459 | carcinine                       | 0      | 4 | 0.518  | --- | --- | 0  |
| 460 | protoveratrine A                | 0.08   | 4 | 0.517  | --- | --- | 25 |
| 461 | bisacodyl                       | 0      | 4 | 0.514  | --- | --- | 0  |
| 462 | rifabutin                       | 0      | 3 | 0.514  | --- | --- | 0  |
| 463 | sulfinpyrazone                  | -0.013 | 4 | 0.512  | --- | --- | 25 |
| 464 | anisomycin                      | -0.148 | 4 | -0.512 | --- | --- | 25 |
| 465 | flunarizine                     | 0      | 4 | 0.511  | --- | --- | 0  |
| 466 | propranolol                     | -0.103 | 4 | -0.511 | --- | --- | 25 |
| 467 | terbutaline                     | 0.085  | 4 | 0.511  | --- | --- | 25 |
| 468 | ellipticine                     | 0      | 4 | 0.51   | --- | --- | 0  |
| 469 | flavoxate                       | 0.133  | 4 | 0.51   | --- | --- | 25 |
| 470 | bendroflumethiazide             | 0.012  | 6 | 0.509  | --- | --- | 33 |
| 471 | roxithromycin                   | 0      | 4 | 0.509  | --- | --- | 0  |
| 472 | telenzepine                     | 0      | 4 | -0.507 | --- | --- | 0  |
| 473 | nicergoline                     | 0      | 5 | 0.506  | --- | --- | 0  |
| 474 | oxprenolol                      | 0      | 4 | 0.505  | --- | --- | 0  |
| 475 | protriptyline                   | 0.026  | 4 | 0.505  | --- | --- | 25 |
| 476 | ronidazole                      | 0      | 3 | 0.505  | --- | --- | 0  |
| 477 | etilefrine                      | -0.136 | 4 | -0.504 | --- | --- | 25 |



|     |                                |        |   |        |     |     |    |
|-----|--------------------------------|--------|---|--------|-----|-----|----|
| 478 | piretanide                     | -0.139 | 4 | -0.504 | --- | --- | 25 |
| 479 | naphazoline                    | -0.208 | 5 | -0.503 | --- | --- | 40 |
| 480 | Prestwick-1080                 | 0      | 4 | -0.503 | --- | --- | 0  |
| 481 | PF-00539745-00                 | 0      | 3 | -0.503 | --- | --- | 0  |
| 482 | cefoxitin                      | 0      | 4 | -0.502 | --- | --- | 0  |
| 483 | gliclazide                     | 0      | 4 | 0.502  | --- | --- | 0  |
| 484 | rescinnamine                   | 0      | 3 | 0.501  | --- | --- | 0  |
| 485 | orlistat                       | -0.218 | 5 | -0.501 | --- | --- | 40 |
| 486 | LM-1685                        | 0.198  | 3 | 0.5    | --- | --- | 33 |
| 487 | latamoxef                      | 0.119  | 3 | 0.5    | --- | --- | 33 |
| 488 | fenbendazole                   | -0.106 | 4 | -0.498 | --- | --- | 25 |
| 489 | skimmianine                    | 0      | 4 | 0.497  | --- | --- | 0  |
| 490 | pyridoxine                     | 0.131  | 4 | 0.497  | --- | --- | 25 |
| 491 | PHA-00767505E                  | 0      | 4 | -0.496 | --- | --- | 0  |
| 492 | bromperidol                    | 0      | 3 | 0.495  | --- | --- | 0  |
| 493 | suxibuzone                     | -0.194 | 4 | 0.495  | --- | --- | 0  |
| 494 | hexestrol                      | 0      | 4 | 0.495  | --- | --- | 0  |
| 495 | esculetin                      | 0      | 3 | -0.495 | --- | --- | 0  |
| 496 | podophyllotoxin                | 0      | 4 | -0.493 | --- | --- | 0  |
| 497 | levamisole                     | 0      | 4 | 0.492  | --- | --- | 0  |
| 498 | loracarbef                     | -0.143 | 4 | -0.492 | --- | --- | 25 |
| 499 | acepromazine                   | 0      | 4 | 0.491  | --- | --- | 0  |
| 500 | rimexolone                     | 0      | 4 | 0.49   | --- | --- | 0  |
| 501 | neostigmine bromide            | 0      | 4 | -0.49  | --- | --- | 0  |
| 502 | zardaverine                    | -0.127 | 4 | -0.489 | --- | --- | 25 |
| 503 | vitexin                        | -0.129 | 4 | -0.489 | --- | --- | 25 |
| 504 | etofylline                     | 0      | 5 | -0.487 | --- | --- | 0  |
| 505 | meglumine                      | -0.128 | 4 | -0.486 | --- | --- | 25 |
| 506 | naproxen                       | -0.117 | 9 | -0.485 | --- | --- | 33 |
| 507 | moxonidine                     | -0.266 | 3 | -0.483 | --- | --- | 33 |
| 508 | (+)-isoprenaline               | -0.153 | 4 | -0.483 | --- | --- | 25 |
| 509 | ofloxacin                      | 0.204  | 5 | 0.48   | --- | --- | 40 |
| 510 | Prestwick-860                  | 0      | 4 | 0.48   | --- | --- | 0  |
| 511 | moroxydine                     | -0.236 | 5 | -0.479 | --- | --- | 40 |
| 512 | ifosfamide                     | -0.188 | 3 | -0.478 | --- | --- | 33 |
| 513 | fluspirilene                   | 0      | 4 | 0.478  | --- | --- | 0  |
| 514 | bephenium<br>hydroxynaphthoate | 0.094  | 5 | 0.477  | --- | --- | 20 |
| 515 | cefotetan                      | 0.158  | 3 | 0.477  | --- | --- | 33 |
| 516 | betamethasone                  | 0.089  | 3 | 0.476  | --- | --- | 33 |
| 517 | cefotiam                       | 0.118  | 4 | -0.473 | --- | --- | 0  |
| 518 | nipecotic acid                 | 0      | 4 | -0.473 | --- | --- | 0  |
| 519 | myosmine                       | -0.082 | 6 | -0.473 | --- | --- | 33 |
| 520 | triamterene                    | -0.23  | 5 | -0.473 | --- | --- | 40 |
| 521 | nadide                         | -0.154 | 4 | -0.472 | --- | --- | 25 |
| 522 | progesterone                   | 0      | 4 | 0.472  | --- | --- | 0  |
| 523 | ceforanide                     | 0.007  | 4 | -0.471 | --- | --- | 25 |
| 524 | ipratropium bromide            | 0      | 3 | 0.471  | --- | --- | 0  |
| 525 | clomifene                      | 0      | 4 | 0.47   | --- | --- | 0  |
| 526 | spiradoline                    | -0.109 | 4 | -0.47  | --- | --- | 25 |
| 527 | mexiletine                     | -0.153 | 6 | -0.47  | --- | --- | 33 |
| 528 | scopoletin                     | 0      | 2 | 0.47   | --- | --- | 0  |
| 529 | nadolol                        | 0.108  | 4 | -0.47  | --- | --- | 0  |
| 530 | etacrynic acid                 | 0      | 3 | -0.469 | --- | --- | 0  |
| 531 | PHA-00816795                   | 0      | 2 | 0.468  | --- | --- | 0  |
| 532 | pentetrazol                    | -0.155 | 4 | -0.468 | --- | --- | 25 |
| 533 | cyclizine                      | 0.138  | 4 | 0.467  | --- | --- | 25 |
| 534 | procyclidine                   | -0.12  | 4 | -0.466 | --- | --- | 25 |
| 535 | torasemide                     | 0      | 4 | 0.466  | --- | --- | 0  |
| 536 | hesperetin                     | 0.077  | 5 | 0.465  | --- | --- | 20 |
| 537 | guanadrel                      | 0.074  | 5 | -0.465 | --- | --- | 0  |

|     |                                |        |   |        |     |     |    |
|-----|--------------------------------|--------|---|--------|-----|-----|----|
| 538 | ceftazidime                    | 0.154  | 3 | 0.465  | --- | --- | 33 |
| 539 | iohexol                        | 0      | 4 | -0.464 | --- | --- | 0  |
| 540 | ketanserin                     | -0.138 | 4 | -0.463 | --- | --- | 25 |
| 541 | tolfenamic acid                | 0.132  | 4 | 0.463  | --- | --- | 25 |
| 542 | pindolol                       | -0.151 | 5 | -0.462 | --- | --- | 40 |
| 543 | probenecid                     | 0      | 4 | -0.462 | --- | --- | 0  |
| 544 | adenosine phosphate            | 0      | 4 | -0.459 | --- | --- | 0  |
| 545 | tetryzoline                    | 0      | 3 | 0.459  | --- | --- | 0  |
| 546 | clemizole                      | 0.205  | 5 | 0.459  | --- | --- | 40 |
| 547 | dehydrocholic acid             | -0.162 | 5 | -0.457 | --- | --- | 20 |
| 548 | beclometasone                  | -0.145 | 3 | 0.457  | --- | --- | 0  |
| 549 | aminohippuric acid             | 0      | 4 | -0.457 | --- | --- | 0  |
| 550 | caffeic acid                   | -0.11  | 3 | 0.456  | --- | --- | 33 |
| 551 | amphotericin B                 | 0.153  | 4 | 0.456  | --- | --- | 25 |
| 552 | eucatropine                    | 0      | 6 | -0.455 | --- | --- | 0  |
| 553 | Prestwick-981                  | 0      | 3 | -0.454 | --- | --- | 0  |
| 554 | vincamine                      | 0.004  | 6 | -0.454 | --- | --- | 16 |
| 555 | isoniazid                      | -0.145 | 5 | -0.454 | --- | --- | 20 |
| 556 | sulfachlorpyridazine           | -0.189 | 5 | -0.453 | --- | --- | 40 |
| 557 | idoxuridine                    | -0.075 | 5 | -0.453 | --- | --- | 20 |
| 558 | SB-202190                      | 0      | 5 | -0.452 | --- | --- | 0  |
| 559 | bupivacaine                    | 0.157  | 4 | 0.451  | --- | --- | 25 |
| 560 | clomipramine                   | 0.148  | 4 | 0.451  | --- | --- | 25 |
| 561 | zaprinast                      | -0.118 | 4 | -0.451 | --- | --- | 25 |
| 562 | corticosterone                 | 0      | 4 | 0.45   | --- | --- | 0  |
| 563 | alfadolone                     | 0      | 3 | -0.45  | --- | --- | 0  |
| 564 | ajmaline                       | -0.068 | 3 | -0.449 | --- | --- | 33 |
| 565 | carbachol                      | 0      | 4 | 0.448  | --- | --- | 0  |
| 566 | triflusal                      | 0      | 3 | 0.448  | --- | --- | 0  |
| 567 | trimethobenzamide              | -0.013 | 5 | -0.448 | --- | --- | 20 |
| 568 | fludroxycortide                | -0.163 | 5 | -0.448 | --- | --- | 40 |
| 569 | Prestwick-1083                 | 0.143  | 3 | 0.447  | --- | --- | 33 |
| 570 | propafenone                    | 0      | 4 | 0.447  | --- | --- | 0  |
| 571 | glycopyrronium bromide         | -0.189 | 5 | -0.446 | --- | --- | 40 |
| 572 | buflomedil                     | 0      | 4 | 0.446  | --- | --- | 0  |
| 573 | aceclofenac                    | 0.049  | 4 | -0.446 | --- | --- | 25 |
| 574 | cefsulodin                     | -0.135 | 4 | -0.445 | --- | --- | 25 |
| 575 | procaine                       | 0.084  | 5 | 0.444  | --- | --- | 20 |
| 576 | methacholine chloride          | 0      | 3 | 0.443  | --- | --- | 33 |
| 577 | alsterpauellone                | 0      | 3 | 0.442  | --- | --- | 0  |
| 578 | etanidazole                    | 0.071  | 4 | 0.441  | --- | --- | 25 |
| 579 | trioxysalen                    | 0      | 4 | 0.44   | --- | --- | 0  |
| 580 | 0297417-0002B                  | -0.186 | 3 | 0.44   | --- | --- | 0  |
| 581 | SC-58125                       | 0.114  | 4 | 0.439  | --- | --- | 25 |
| 582 | dinoprostone                   | -0.125 | 4 | -0.438 | --- | --- | 25 |
| 583 | iodixanol                      | 0      | 3 | -0.438 | --- | --- | 0  |
| 584 | clofazimine                    | -0.13  | 5 | -0.438 | --- | --- | 20 |
| 585 | Chicago Sky Blue 6B            | 0.072  | 4 | -0.436 | --- | --- | 0  |
| 586 | pronetalol                     | 0      | 4 | 0.435  | --- | --- | 0  |
| 587 | Prestwick-692                  | 0.051  | 4 | -0.435 | --- | --- | 25 |
| 588 | doxazosin                      | 0      | 4 | 0.435  | --- | --- | 0  |
| 589 | BAS-012416453                  | 0.163  | 3 | 0.434  | --- | --- | 33 |
| 590 | guanethidine                   | -0.055 | 3 | 0.434  | --- | --- | 33 |
| 591 | benzathine<br>benzylpenicillin | 0      | 4 | -0.434 | --- | --- | 0  |
| 592 | troleandomycin                 | 0      | 4 | 0.434  | --- | --- | 0  |
| 593 | monobenzone                    | 0      | 4 | 0.434  | --- | --- | 0  |
| 594 | mestranol                      | 0.121  | 4 | 0.433  | --- | --- | 25 |
| 595 | promazine                      | 0.091  | 6 | 0.433  | --- | --- | 16 |
| 596 | tolnaftate                     | -0.094 | 5 | -0.432 | --- | --- | 20 |
| 597 | cefotaxime                     | 0      | 5 | -0.431 | --- | --- | 0  |

|     |                                         |        |   |        |     |     |    |
|-----|-----------------------------------------|--------|---|--------|-----|-----|----|
| 598 | sulconazole                             | 0      | 4 | 0.43   | --- | --- | 0  |
| 599 | 5211181                                 | 0      | 2 | -0.43  | --- | --- | 0  |
| 600 | primaquine                              | 0      | 4 | 0.429  | --- | --- | 0  |
| 601 | C-75                                    | 0      | 4 | 0.428  | --- | --- | 0  |
| 602 | diethylcarbamazine                      | -0.178 | 4 | -0.428 | --- | --- | 25 |
| 603 | sulfadimethoxine                        | 0.064  | 5 | -0.428 | --- | --- | 0  |
| 604 | resveratrol                             | 0.077  | 9 | 0.427  | --- | --- | 22 |
| 605 | 16,16-dimethylprostaglandin E2          | 0.123  | 3 | 0.427  | --- | --- | 33 |
| 606 | cefazolin                               | -0.199 | 5 | -0.426 | --- | --- | 40 |
| 607 | butyl hydroxybenzoate                   | 0.07   | 5 | 0.426  | --- | --- | 40 |
| 608 | ambroxol                                | 0.021  | 4 | -0.426 | --- | --- | 25 |
| 609 | picrotoxinin                            | 0.117  | 4 | 0.426  | --- | --- | 25 |
| 610 | arachidonic acid                        | -0.061 | 3 | -0.426 | --- | --- | 33 |
| 611 | chrysin                                 | 0      | 3 | 0.425  | --- | --- | 0  |
| 612 | butirosin                               | 0.1    | 4 | 0.425  | --- | --- | 25 |
| 613 | metacycline                             | 0      | 4 | -0.425 | --- | --- | 0  |
| 614 | mepyramine                              | 0.156  | 4 | 0.424  | --- | --- | 25 |
| 615 | dantrolene                              | 0.16   | 6 | 0.424  | --- | --- | 33 |
| 616 | lobelanidine                            | 0.11   | 4 | 0.424  | --- | --- | 25 |
| 617 | aconitine                               | 0      | 4 | -0.423 | --- | --- | 0  |
| 618 | ampyrone                                | 0.061  | 5 | -0.423 | --- | --- | 20 |
| 619 | colforsin                               | -0.136 | 5 | -0.423 | --- | --- | 20 |
| 620 | guanabenz                               | -0.168 | 5 | -0.423 | --- | --- | 40 |
| 621 | levopropoxyphene                        | 0      | 4 | -0.422 | --- | --- | 0  |
| 622 | myricetin                               | 0      | 4 | -0.422 | --- | --- | 0  |
| 623 | tiaprofenic acid                        | -0.108 | 4 | -0.422 | --- | --- | 25 |
| 624 | BCB000040                               | 0      | 4 | -0.422 | --- | --- | 0  |
| 625 | galantamine                             | 0.108  | 4 | 0.422  | --- | --- | 25 |
| 626 | butacaine                               | -0.106 | 4 | -0.421 | --- | --- | 25 |
| 627 | enalapril                               | 0      | 4 | -0.421 | --- | --- | 0  |
| 628 | androsterone                            | -0.167 | 4 | -0.42  | --- | --- | 25 |
| 629 | gabexate                                | 0      | 4 | -0.419 | --- | --- | 0  |
| 630 | Prestwick-967                           | -0.169 | 4 | -0.419 | --- | --- | 25 |
| 631 | acetylsalicylsalicylic acid             | 0.13   | 4 | 0.419  | --- | --- | 25 |
| 632 | saquinavir                              | 0      | 4 | -0.418 | --- | --- | 0  |
| 633 | 3-acetamidocoumarin                     | 0.12   | 4 | -0.418 | --- | --- | 0  |
| 634 | aminophylline                           | 0      | 4 | 0.418  | --- | --- | 0  |
| 635 | delsoline                               | 0.124  | 4 | 0.418  | --- | --- | 25 |
| 636 | nicardipine                             | 0.12   | 4 | 0.418  | --- | --- | 25 |
| 637 | alpha-ergocryptine                      | -0.136 | 6 | -0.418 | --- | --- | 33 |
| 638 | flumetasone                             | 0.113  | 6 | 0.417  | --- | --- | 33 |
| 639 | estropipate                             | 0      | 4 | -0.417 | --- | --- | 0  |
| 640 | napelline                               | -0.059 | 4 | 0.417  | --- | --- | 25 |
| 641 | AH-23848                                | -0.212 | 3 | -0.417 | --- | --- | 33 |
| 642 | cyproheptadine                          | 0      | 5 | 0.417  | --- | --- | 0  |
| 643 | 11-deoxy-16,16-dimethylprostaglandin E2 | 0.099  | 4 | 0.416  | --- | --- | 25 |
| 644 | dimethadione                            | 0      | 4 | -0.415 | --- | --- | 0  |
| 645 | butoconazole                            | 0.168  | 4 | 0.414  | --- | --- | 25 |
| 646 | pheneticillin                           | 0.005  | 4 | -0.414 | --- | --- | 25 |
| 647 | liothyronine                            | 0      | 4 | 0.414  | --- | --- | 0  |
| 648 | mefloquine                              | 0.096  | 5 | 0.413  | --- | --- | 40 |
| 649 | ioxaglic acid                           | -0.171 | 3 | 0.413  | --- | --- | 0  |
| 650 | CP-944629                               | -0.16  | 4 | -0.413 | --- | --- | 25 |
| 651 | bepriidil                               | -0.135 | 4 | 0.413  | --- | --- | 0  |

|     |                                |        |    |        |     |     |    |
|-----|--------------------------------|--------|----|--------|-----|-----|----|
| 652 | docosaheanoic acid ethyl ester | 0      | 2  | -0.412 | --- | --- | 0  |
| 653 | moxisylyte                     | -0.094 | 5  | -0.412 | --- | --- | 20 |
| 654 | sertaconazole                  | 0.111  | 4  | 0.411  | --- | --- | 25 |
| 655 | Prestwick-665                  | -0.002 | 5  | 0.41   | --- | --- | 20 |
| 656 | tiabendazole                   | 0      | 4  | 0.41   | --- | --- | 0  |
| 657 | cinchonine                     | 0.097  | 4  | -0.409 | --- | --- | 0  |
| 658 | gallamine triethiodide         | 0      | 5  | 0.409  | --- | --- | 0  |
| 659 | cyclopenthiazide               | -0.159 | 4  | -0.409 | --- | --- | 25 |
| 660 | 7-aminocephalosporanic acid    | 0.165  | 4  | 0.409  | --- | --- | 25 |
| 661 | bretylum tosilate              | 0.101  | 4  | 0.409  | --- | --- | 25 |
| 662 | tetraethylenepentamine         | -0.176 | 6  | -0.409 | --- | --- | 33 |
| 663 | hyoscyamine                    | 0.086  | 5  | 0.408  | --- | --- | 20 |
| 664 | lynestrenol                    | -0.257 | 5  | -0.408 | --- | --- | 40 |
| 665 | lumicolchicine                 | 0      | 3  | -0.408 | --- | --- | 0  |
| 666 | gossypol                       | 0.065  | 6  | 0.407  | --- | --- | 16 |
| 667 | merbromin                      | 0.08   | 5  | -0.407 | --- | --- | 0  |
| 668 | trimetazidine                  | 0      | 4  | 0.407  | --- | --- | 0  |
| 669 | adrenosterone                  | 0      | 4  | 0.407  | --- | --- | 0  |
| 670 | zomepirac                      | -0.123 | 4  | -0.406 | --- | --- | 25 |
| 671 | clidinium bromide              | 0      | 4  | -0.406 | --- | --- | 0  |
| 672 | adiphenine                     | 0.144  | 5  | -0.405 | --- | --- | 0  |
| 673 | prednicarbate                  | 0      | 3  | 0.405  | --- | --- | 0  |
| 674 | pentoxyverine                  | -0.157 | 4  | 0.405  | --- | --- | 0  |
| 675 | methanthelinium bromide        | -0.142 | 4  | -0.404 | --- | --- | 25 |
| 676 | meclofenamic acid              | 0      | 5  | -0.404 | --- | --- | 0  |
| 677 | lysergol                       | -0.053 | 4  | 0.402  | --- | --- | 25 |
| 678 | mycophenolic acid              | 0.192  | 3  | 0.402  | --- | --- | 33 |
| 679 | dicloxacillin                  | 0      | 4  | -0.401 | --- | --- | 0  |
| 680 | TTNPB                          | 0      | 2  | 0.401  | --- | --- | 0  |
| 681 | pilocarpine                    | 0.149  | 4  | -0.401 | --- | --- | 0  |
| 682 | calcium folinate               | 0.081  | 5  | -0.398 | --- | --- | 0  |
| 683 | cisapride                      | 0.137  | 4  | 0.398  | --- | --- | 25 |
| 684 | pyrazinamide                   | 0      | 4  | 0.398  | --- | --- | 0  |
| 685 | physostigmine                  | 0.149  | 4  | 0.398  | --- | --- | 25 |
| 686 | tetrahydroalstonine            | -0.144 | 4  | -0.397 | --- | --- | 25 |
| 687 | imidurea                       | -0.281 | 3  | -0.396 | --- | --- | 33 |
| 688 | metrizamide                    | -0.165 | 4  | -0.396 | --- | --- | 25 |
| 689 | proadifen                      | -0.111 | 4  | -0.396 | --- | --- | 25 |
| 690 | 0179445-0000                   | -0.135 | 8  | -0.395 | --- | --- | 25 |
| 691 | Prestwick-559                  | -0.215 | 3  | 0.395  | --- | --- | 0  |
| 692 | diphenylpyraline               | 0.103  | 6  | -0.394 | --- | --- | 0  |
| 693 | terconazole                    | 0      | 4  | 0.393  | --- | --- | 0  |
| 694 | ginkgolide A                   | -0.091 | 4  | 0.392  | --- | --- | 0  |
| 695 | nitrendipine                   | -0.039 | 5  | 0.392  | --- | --- | 20 |
| 696 | diazoxide                      | -0.244 | 5  | -0.392 | --- | --- | 40 |
| 697 | diltiazem                      | -0.254 | 5  | -0.391 | --- | --- | 40 |
| 698 | ethambutol                     | 0.115  | 5  | 0.391  | --- | --- | 20 |
| 699 | geldanamycin                   | -0.318 | 15 | -0.391 | --- | --- | 46 |
| 700 | bambuterol                     | 0.076  | 4  | -0.39  | --- | --- | 0  |
| 701 | pyrvinium                      | -0.247 | 6  | -0.389 | --- | --- | 33 |
| 702 | lisuride                       | 0.103  | 5  | -0.387 | --- | --- | 0  |
| 703 | levcycloserine                 | -0.142 | 4  | -0.387 | --- | --- | 25 |
| 704 | propofol                       | 0      | 4  | 0.387  | --- | --- | 0  |
| 705 | rosiglitazone                  | -0.08  | 14 | -0.386 | --- | --- | 14 |
| 706 | theophylline                   | 0      | 4  | -0.386 | --- | --- | 0  |
| 707 | paroxetine                     | -0.134 | 4  | -0.386 | --- | --- | 25 |
| 708 | cimetidine                     | 0.083  | 5  | 0.386  | --- | --- | 40 |
| 709 | acetazolamide                  | 0      | 4  | 0.386  | --- | --- | 0  |

|     |                           |        |   |        |     |     |    |
|-----|---------------------------|--------|---|--------|-----|-----|----|
| 710 | yohimbine                 | -0.072 | 5 | -0.385 | --- | --- | 20 |
| 711 | N-acetyl-L-leucine        | 0      | 4 | 0.385  | --- | --- | 0  |
| 712 | lymecycline               | -0.129 | 4 | 0.385  | --- | --- | 0  |
| 713 | paromomycin               | -0.108 | 4 | -0.385 | --- | --- | 25 |
| 714 | staurosporine             | 0      | 4 | -0.384 | --- | --- | 0  |
| 715 | zidovudine                | -0.153 | 4 | -0.384 | --- | --- | 25 |
| 716 | mafenide                  | -0.065 | 5 | -0.384 | --- | --- | 40 |
| 717 | altizide                  | 0      | 4 | 0.383  | --- | --- | 0  |
| 718 | hexetidine                | 0.148  | 4 | -0.383 | --- | --- | 0  |
| 719 | sulfamonomethoxine        | -0.046 | 4 | -0.383 | --- | --- | 25 |
| 720 | fluorouracil              | 0      | 4 | -0.383 | --- | --- | 0  |
| 721 | ursodeoxycholic acid      | 0      | 3 | 0.382  | --- | --- | 0  |
| 722 | flumequine                | 0.14   | 4 | 0.382  | --- | --- | 25 |
| 723 | rotenone                  | -0.091 | 4 | -0.382 | --- | --- | 25 |
| 724 | griseofulvin              | 0.197  | 5 | 0.382  | --- | --- | 40 |
| 725 | 2,6-dimethylpiperidine    | -0.08  | 5 | -0.382 | --- | --- | 20 |
| 726 | 2-aminobenzenesulfonamide | -0.119 | 4 | -0.381 | --- | --- | 25 |
| 727 | ergocalciferol            | 0      | 4 | -0.381 | --- | --- | 0  |
| 728 | PNU-0293363               | -0.004 | 3 | -0.381 | --- | --- | 33 |
| 729 | antazoline                | -0.128 | 4 | -0.381 | --- | --- | 25 |
| 730 | hydrocotamine             | 0      | 4 | 0.381  | --- | --- | 0  |
| 731 | sulfaphenazole            | 0.162  | 4 | 0.381  | --- | --- | 25 |
| 732 | nifuroxazide              | 0      | 4 | 0.38   | --- | --- | 0  |
| 733 | sulfabenzamide            | 0.076  | 4 | 0.38   | --- | --- | 25 |
| 734 | BCB000039                 | 0      | 3 | 0.38   | --- | --- | 0  |
| 735 | disulfiram                | -0.089 | 5 | -0.379 | --- | --- | 40 |
| 736 | cinchocaine               | 0.119  | 5 | 0.378  | --- | --- | 20 |
| 737 | oxamniquine               | 0      | 4 | -0.378 | --- | --- | 0  |
| 738 | hydrocortisone            | -0.118 | 3 | -0.378 | --- | --- | 33 |
| 739 | streptozocin              | 0      | 4 | -0.378 | --- | --- | 0  |
| 740 | nalbuphine                | -0.274 | 5 | -0.378 | --- | --- | 40 |
| 741 | meclofenoxate             | 0.004  | 6 | 0.377  | --- | --- | 16 |
| 742 | CP-320650-01              | 0      | 8 | -0.377 | --- | --- | 12 |
| 743 | naloxone                  | 0      | 6 | 0.377  | --- | --- | 0  |
| 744 | harman                    | 0      | 4 | -0.376 | --- | --- | 0  |
| 745 | benzonatate               | 0      | 5 | 0.376  | --- | --- | 0  |
| 746 | aciclovir                 | -0.004 | 6 | -0.375 | --- | --- | 16 |
| 747 | boldine                   | -0.116 | 4 | -0.375 | --- | --- | 25 |
| 748 | suprofen                  | -0.154 | 4 | -0.375 | --- | --- | 25 |
| 749 | sulfacetamide             | 0      | 4 | 0.375  | --- | --- | 0  |
| 750 | NS-398                    | 0.008  | 3 | 0.374  | --- | --- | 33 |
| 751 | metoclopramide            | -0.142 | 6 | -0.373 | --- | --- | 33 |
| 752 | Prestwick-984             | -0.119 | 4 | -0.373 | --- | --- | 25 |
| 753 | molsidomine               | 0.097  | 4 | 0.373  | --- | --- | 25 |
| 754 | tocainide                 | 0.146  | 4 | -0.373 | --- | --- | 0  |
| 755 | vidarabine                | -0.031 | 4 | 0.373  | --- | --- | 25 |
| 756 | alimemazine               | 0.131  | 4 | 0.373  | --- | --- | 25 |
| 757 | 3-nitropropionic acid     | -0.141 | 4 | -0.372 | --- | --- | 25 |
| 758 | metrifonate               | -0.133 | 5 | -0.372 | --- | --- | 40 |
| 759 | praziquantel              | -0.122 | 4 | -0.372 | --- | --- | 25 |
| 760 | fenoprofen                | -0.041 | 6 | 0.371  | --- | --- | 16 |
| 761 | gentamicin                | 0.102  | 4 | -0.371 | --- | --- | 0  |
| 762 | natamycin                 | -0.19  | 4 | -0.371 | --- | --- | 25 |
| 763 | ketoconazole              | -0.112 | 4 | 0.371  | --- | --- | 25 |
| 764 | isoxicam                  | 0      | 5 | -0.37  | --- | --- | 0  |
| 765 | acemetacin                | 0      | 4 | -0.37  | --- | --- | 0  |
| 766 | cefalexin                 | 0      | 5 | 0.369  | --- | --- | 0  |
| 767 | bergenin                  | 0      | 4 | -0.368 | --- | --- | 0  |
| 768 | rolitetracycline          | 0      | 4 | 0.368  | --- | --- | 0  |

|     |                        |        |     |        |     |     |    |
|-----|------------------------|--------|-----|--------|-----|-----|----|
| 769 | iobenguane             | -0.204 | 4   | -0.367 | --- | --- | 25 |
| 770 | netilmicin             | -0.148 | 4   | -0.367 | --- | --- | 25 |
| 771 | prenylamine            | 0      | 4   | 0.367  | --- | --- | 0  |
| 772 | proguanil              | 0.123  | 3   | 0.367  | --- | --- | 33 |
| 773 | dihydroergocristine    | 0.107  | 4   | -0.367 | --- | --- | 0  |
| 774 | lithocholic acid       | 0      | 6   | -0.367 | --- | --- | 0  |
| 775 | pizotifen              | 0.092  | 4   | 0.366  | --- | --- | 25 |
| 776 | thioridazine           | 0.132  | 20  | 0.366  | --- | --- | 45 |
| 777 | alpha-yohimbine        | 0.116  | 3   | 0.366  | --- | --- | 33 |
| 778 | quercetin              | -0.148 | 6   | -0.366 | --- | --- | 33 |
| 779 | ticlopidine            | -0.11  | 5   | -0.366 | --- | --- | 20 |
| 780 | rifampicin             | 0      | 4   | -0.365 | --- | --- | 0  |
| 781 | yohimbic acid          | 0.138  | 3   | -0.365 | --- | --- | 0  |
| 782 | khellin                | 0      | 5   | -0.364 | --- | --- | 0  |
| 783 | flucytosine            | -0.151 | 4   | -0.364 | --- | --- | 25 |
| 784 | ethoxyquin             | -0.086 | 5   | -0.363 | --- | --- | 20 |
| 785 | fluphenazine           | 0.11   | 18  | 0.363  | --- | --- | 27 |
| 786 | aminoglutethimide      | -0.182 | 3   | -0.363 | --- | --- | 33 |
| 787 | isradipine             | 0.171  | 4   | 0.363  | --- | --- | 25 |
| 788 | levocabastine          | 0.126  | 4   | 0.363  | --- | --- | 25 |
| 789 | decamethonium bromide  | 0      | 4   | 0.362  | --- | --- | 0  |
| 790 | dinoprost              | 0.138  | 4   | 0.362  | --- | --- | 25 |
| 791 | glimepiride            | 0.068  | 4   | 0.362  | --- | --- | 25 |
| 792 | iopromide              | 0      | 4   | -0.361 | --- | --- | 0  |
| 793 | apomorphine            | 0.005  | 5   | 0.36   | --- | --- | 20 |
| 794 | phenformin             | 0.065  | 7   | 0.36   | --- | --- | 28 |
| 795 | oxaprozin              | 0      | 6   | 0.359  | --- | --- | 0  |
| 796 | alexidine              | 0      | 4   | -0.358 | --- | --- | 0  |
| 797 | cefamandole            | -0.156 | 4   | -0.357 | --- | --- | 25 |
| 798 | metyrapone             | -0.176 | 4   | 0.357  | --- | --- | 0  |
| 799 | tranylcypromine        | 0.098  | 5   | 0.357  | --- | --- | 20 |
| 800 | bacampicillin          | -0.12  | 4   | -0.357 | --- | --- | 25 |
| 801 | diethylstilbestrol     | -0.062 | 6   | -0.357 | --- | --- | 33 |
| 802 | trichostatin A         | 0.118  | 182 | 0.357  | --- | --- | 30 |
| 803 | loperamide             | 0.13   | 6   | 0.357  | --- | --- | 33 |
| 804 | co-dergocrine mesilate | 0.128  | 4   | -0.356 | --- | --- | 0  |
| 805 | carbamazepine          | 0.056  | 8   | 0.356  | --- | --- | 12 |
| 806 | azapropazone           | 0.173  | 3   | -0.355 | --- | --- | 0  |
| 807 | dequalinium chloride   | -0.197 | 4   | -0.355 | --- | --- | 25 |
| 808 | Prestwick-1103         | 0.143  | 4   | -0.355 | --- | --- | 0  |
| 809 | propantheline bromide  | 0.124  | 4   | 0.354  | --- | --- | 25 |
| 810 | hecogenin              | 0.123  | 4   | 0.354  | --- | --- | 25 |
| 811 | talampicillin          | -0.131 | 4   | -0.354 | --- | --- | 25 |
| 812 | serotonin              | 0.202  | 5   | 0.354  | --- | --- | 40 |
| 813 | alprostadil            | 0.024  | 7   | -0.353 | --- | --- | 14 |
| 814 | propoxycaine           | 0.129  | 4   | 0.353  | --- | --- | 25 |
| 815 | fluocinonide           | 0.093  | 5   | 0.352  | --- | --- | 20 |
| 816 | guanfacine             | 0.081  | 5   | 0.352  | --- | --- | 20 |
| 817 | chlorhexidine          | -0.167 | 5   | -0.351 | --- | --- | 40 |
| 818 | epirizole              | -0.099 | 5   | -0.351 | --- | --- | 40 |
| 819 | cefmetazole            | 0.099  | 4   | 0.351  | --- | --- | 25 |
| 820 | roxarson               | -0.084 | 4   | -0.351 | --- | --- | 25 |
| 821 | fursultiamine          | 0.139  | 4   | 0.351  | --- | --- | 25 |
| 822 | hydroquinine           | 0.113  | 4   | 0.351  | --- | --- | 25 |
| 823 | levobunolol            | 0.023  | 4   | -0.35  | --- | --- | 25 |
| 824 | cobalt chloride        | 0.07   | 3   | -0.35  | --- | --- | 33 |
| 825 | vorinostat             | 0.041  | 12  | 0.349  | --- | --- | 16 |
| 826 | dipivefrine            | 0      | 4   | 0.349  | --- | --- | 0  |
| 827 | ribavirin              | 0.095  | 4   | -0.349 | --- | --- | 0  |
| 828 | diflorasone            | -0.191 | 4   | -0.349 | --- | --- | 25 |
| 829 | todalazine             | 0.102  | 5   | 0.349  | --- | --- | 20 |

|     |                     |        |    |        |     |     |    |
|-----|---------------------|--------|----|--------|-----|-----|----|
| 830 | ganciclovir         | 0      | 4  | 0.348  | --- | --- | 0  |
| 831 | clotrimazole        | -0.117 | 5  | -0.348 | --- | --- | 40 |
| 832 | niflumic acid       | -0.138 | 4  | -0.347 | --- | --- | 25 |
| 833 | seneciophylline     | 0      | 4  | 0.347  | --- | --- | 0  |
| 834 | etodolac            | -0.144 | 5  | -0.347 | --- | --- | 20 |
| 835 | doxepin             | 0.222  | 3  | 0.347  | --- | --- | 33 |
| 836 | conessine           | 0      | 4  | -0.347 | --- | --- | 0  |
| 837 | homatropine         | 0      | 5  | -0.346 | --- | --- | 0  |
| 838 | methylergometrine   | -0.191 | 4  | 0.346  | --- | --- | 0  |
| 839 | flecainide          | -0.068 | 6  | -0.345 | --- | --- | 33 |
| 840 | fendiline           | -0.2   | 3  | -0.345 | --- | --- | 33 |
| 841 | oxolinic acid       | -0.13  | 5  | -0.344 | --- | --- | 40 |
| 842 | minocycline         | -0.267 | 5  | -0.344 | --- | --- | 40 |
| 843 | isoconazole         | -0.092 | 5  | -0.344 | --- | --- | 20 |
| 844 | ciclosporin         | -0.061 | 6  | -0.344 | --- | --- | 16 |
| 845 | chlorpropamide      | -0.189 | 6  | -0.343 | --- | --- | 33 |
| 846 | dosulepin           | 0.103  | 4  | 0.343  | --- | --- | 25 |
| 847 | mevalolactone       | 0.104  | 3  | 0.342  | --- | --- | 33 |
| 848 | CP-319743           | -0.081 | 4  | -0.342 | --- | --- | 25 |
| 849 | clozapine           | -0.124 | 17 | -0.342 | --- | --- | 17 |
| 850 | glycocholic acid    | 0.17   | 4  | -0.342 | --- | --- | 0  |
| 851 | risperidone         | -0.098 | 3  | 0.341  | --- | --- | 33 |
| 852 | repaglinide         | -0.167 | 4  | -0.341 | --- | --- | 25 |
| 853 | tolazamide          | 0      | 3  | -0.341 | --- | --- | 0  |
| 854 | solasodine          | -0.081 | 6  | -0.341 | --- | --- | 16 |
| 855 | acenocoumarol       | 0.022  | 5  | -0.34  | --- | --- | 20 |
| 856 | moracizine          | -0.147 | 4  | -0.34  | --- | --- | 25 |
| 857 | piribedil           | -0.106 | 4  | -0.34  | --- | --- | 25 |
| 858 | glibenclamide       | 0      | 4  | 0.34   | --- | --- | 0  |
| 859 | nabumetone          | 0      | 4  | 0.339  | --- | --- | 0  |
| 860 | etidronic acid      | -0.122 | 4  | 0.339  | --- | --- | 0  |
| 861 | lobeline            | 0.119  | 4  | 0.339  | --- | --- | 25 |
| 862 | naftopidil          | -0.231 | 3  | -0.338 | --- | --- | 33 |
| 863 | Prestwick-689       | -0.186 | 4  | 0.338  | --- | --- | 0  |
| 864 | Prestwick-1082      | 0.185  | 3  | -0.338 | --- | --- | 0  |
| 865 | mecamylamine        | -0.016 | 3  | -0.337 | --- | --- | 33 |
| 866 | proxymetacaine      | 0      | 4  | -0.337 | --- | --- | 0  |
| 867 | chlorogenic acid    | 0      | 4  | -0.337 | --- | --- | 0  |
| 868 | fipexide            | -0.131 | 3  | -0.336 | --- | --- | 33 |
| 869 | doxylamine          | -0.243 | 5  | -0.336 | --- | --- | 40 |
| 870 | trimethoprim        | -0.192 | 5  | -0.336 | --- | --- | 40 |
| 871 | scopolamine N-oxide | -0.012 | 5  | 0.335  | --- | --- | 20 |
| 872 | cefoperazone        | 0.159  | 3  | 0.335  | --- | --- | 33 |
| 873 | iopanoic acid       | 0.115  | 4  | 0.334  | --- | --- | 25 |
| 874 | drofenine           | 0      | 4  | 0.334  | --- | --- | 0  |
| 875 | imipramine          | 0      | 4  | 0.334  | --- | --- | 0  |
| 876 | trazodone           | -0.219 | 3  | 0.334  | --- | --- | 0  |
| 877 | Prestwick-685       | 0.086  | 5  | 0.333  | --- | --- | 20 |
| 878 | dexpropranolol      | -0.31  | 3  | -0.333 | --- | --- | 33 |
| 879 | minoxidil           | -0.129 | 5  | -0.332 | --- | --- | 20 |
| 880 | isopropamide iodide | -0.17  | 4  | -0.332 | --- | --- | 25 |
| 881 | enilconazole        | -0.021 | 4  | -0.332 | --- | --- | 25 |
| 882 | phenacetin          | -0.114 | 4  | 0.331  | --- | --- | 25 |
| 883 | prednisone          | -0.128 | 5  | -0.331 | --- | --- | 20 |
| 884 | sulfasalazine       | 0      | 5  | 0.331  | --- | --- | 0  |
| 885 | atropine            | 0      | 4  | 0.331  | --- | --- | 0  |
| 886 | naringin            | 0.078  | 4  | 0.331  | --- | --- | 25 |
| 887 | ramipril            | 0.118  | 4  | 0.331  | --- | --- | 25 |
| 888 | trimethadione       | 0.118  | 4  | -0.331 | --- | --- | 0  |
| 889 | hexylcaine          | 0      | 4  | -0.33  | --- | --- | 0  |
| 890 | aminocaproic acid   | -0.223 | 3  | -0.33  | --- | --- | 33 |

|     |                       |        |    |        |     |     |    |
|-----|-----------------------|--------|----|--------|-----|-----|----|
| 891 | tolmetin              | -0.153 | 4  | -0.33  | --- | --- | 25 |
| 892 | trifluoperazine       | 0.001  | 16 | 0.329  | --- | --- | 12 |
| 893 | etomidate             | -0.273 | 3  | -0.329 | --- | --- | 33 |
| 894 | pyrithyldione         | 0.101  | 4  | -0.329 | --- | --- | 0  |
| 895 | acacetin              | -0.136 | 6  | -0.328 | --- | --- | 33 |
| 896 | fenofibrate           | -0.111 | 3  | -0.328 | --- | --- | 33 |
| 897 | flunixin              | -0.097 | 5  | 0.327  | --- | --- | 0  |
| 898 | PF-01378883-00        | -0.001 | 4  | -0.327 | --- | --- | 25 |
| 899 | adipiodone            | 0      | 4  | -0.327 | --- | --- | 0  |
| 900 | hydrastinine          | -0.175 | 5  | -0.327 | --- | --- | 40 |
| 901 | econazole             | 0.136  | 4  | 0.326  | --- | --- | 25 |
| 902 | mefenamic acid        | -0.143 | 5  | -0.326 | --- | --- | 20 |
| 903 | pheniramine           | 0.127  | 5  | 0.326  | --- | --- | 20 |
| 904 | hydroflumethiazide    | -0.125 | 5  | -0.326 | --- | --- | 20 |
| 905 | pentoxifylline        | 0.063  | 5  | 0.326  | --- | --- | 40 |
| 906 | sulfamethoxazole      | 0.111  | 5  | 0.325  | --- | --- | 20 |
| 907 | cinnarizine           | -0.165 | 4  | 0.325  | --- | --- | 0  |
| 908 | antimycin A           | -0.233 | 5  | -0.325 | --- | --- | 40 |
| 909 | lincomycin            | -0.084 | 3  | -0.325 | --- | --- | 33 |
| 910 | cyclopentolate        | -0.075 | 4  | 0.325  | --- | --- | 25 |
| 911 | cefadroxil            | 0      | 4  | -0.324 | --- | --- | 0  |
| 912 | benzbromarone         | 0      | 3  | -0.324 | --- | --- | 0  |
| 913 | finasteride           | -0.014 | 6  | -0.324 | --- | --- | 33 |
| 914 | omeprazole            | -0.061 | 4  | 0.323  | --- | --- | 25 |
| 915 | brompheniramine       | 0.112  | 4  | 0.322  | --- | --- | 25 |
| 916 | lorglumide            | -0.024 | 5  | 0.322  | --- | --- | 20 |
| 917 | citolone              | -0.026 | 6  | -0.322 | --- | --- | 16 |
| 918 | danzol                | 0.14   | 4  | 0.322  | --- | --- | 25 |
| 919 | pyrantel              | -0.191 | 5  | -0.321 | --- | --- | 40 |
| 920 | sulfamerazine         | -0.122 | 5  | -0.321 | --- | --- | 20 |
| 921 | AG-028671             | -0.162 | 3  | -0.321 | --- | --- | 33 |
| 922 | 1,4-chrysenequinone   | 0      | 2  | 0.321  | --- | --- | 0  |
| 923 | Prestwick-682         | 0.096  | 4  | 0.32   | --- | --- | 25 |
| 924 | clemastine            | 0.212  | 3  | 0.32   | --- | --- | 33 |
| 925 | chlorpromazine        | -0.039 | 19 | 0.32   | --- | --- | 10 |
| 926 | labetalol             | -0.127 | 4  | -0.32  | --- | --- | 25 |
| 927 | atropine methonitrate | 0.161  | 3  | 0.319  | --- | --- | 33 |
| 928 | quipazine             | 0.07   | 4  | 0.318  | --- | --- | 25 |
| 929 | articaine             | 0.126  | 3  | 0.317  | --- | --- | 33 |
| 930 | sulfafurazole         | -0.239 | 5  | -0.316 | --- | --- | 40 |
| 931 | metformin             | -0.063 | 10 | -0.316 | --- | --- | 20 |
| 932 | lomustine             | 0.036  | 4  | 0.316  | --- | --- | 25 |
| 933 | hydroxyachillin       | -0.08  | 4  | -0.316 | --- | --- | 25 |
| 934 | calycanthine          | 0.035  | 4  | 0.315  | --- | --- | 25 |
| 935 | benperidol            | 0      | 4  | 0.315  | --- | --- | 0  |
| 936 | lansoprazole          | 0.111  | 4  | -0.315 | --- | --- | 0  |
| 937 | proscillaridin        | 0      | 3  | -0.315 | --- | --- | 0  |
| 938 | meprylcaine           | -0.119 | 4  | 0.314  | --- | --- | 25 |
| 939 | gelsemine             | -0.022 | 4  | 0.314  | --- | --- | 25 |
| 940 | guaifenesin           | 0.002  | 6  | -0.314 | --- | --- | 33 |
| 941 | mifepristone          | 0      | 4  | 0.313  | --- | --- | 0  |
| 942 | cefaclor              | 0.085  | 4  | -0.313 | --- | --- | 0  |
| 943 | procainamide          | 0      | 4  | 0.313  | --- | --- | 0  |
| 944 | arcaine               | 0.166  | 4  | 0.313  | --- | --- | 25 |
| 945 | Prestwick-920         | 0.096  | 4  | 0.312  | --- | --- | 25 |
| 946 | BCB000038             | -0.018 | 4  | 0.312  | --- | --- | 25 |
| 947 | diflunisal            | 0      | 5  | -0.312 | --- | --- | 0  |
| 948 | imipenem              | -0.156 | 4  | 0.312  | --- | --- | 0  |
| 949 | amikacin              | -0.109 | 4  | -0.311 | --- | --- | 25 |
| 950 | Prestwick-664         | 0.006  | 6  | 0.311  | --- | --- | 16 |
| 951 | ranitidine            | -0.1   | 5  | -0.311 | --- | --- | 20 |



|      |                           |        |    |        |     |     |    |
|------|---------------------------|--------|----|--------|-----|-----|----|
| 952  | laudanosine               | 0      | 4  | 0.311  | --- | --- | 0  |
| 953  | monorden                  | -0.223 | 22 | -0.31  | --- | --- | 40 |
| 954  | benzethonium chloride     | -0.196 | 3  | -0.31  | --- | --- | 33 |
| 955  | quinidine                 | 0.096  | 3  | 0.31   | --- | --- | 33 |
| 956  | pempidine                 | -0.241 | 5  | -0.31  | --- | --- | 40 |
| 957  | cefuroxime                | 0      | 4  | -0.309 | --- | --- | 0  |
| 958  | trimethylcolchicinic acid | -0.096 | 4  | -0.309 | --- | --- | 25 |
| 959  | atovaquone                | -0.237 | 3  | -0.309 | --- | --- | 33 |
| 960  | fenbufen                  | 0.169  | 6  | 0.309  | --- | --- | 33 |
| 961  | troglitazone              | 0.134  | 16 | 0.309  | --- | --- | 43 |
| 962  | amylocaine                | 0.105  | 5  | 0.308  | --- | --- | 20 |
| 963  | letrozole                 | -0.067 | 4  | -0.308 | --- | --- | 25 |
| 964  | solanine                  | 0      | 4  | 0.308  | --- | --- | 0  |
| 965  | Prestwick-674             | -0.172 | 6  | -0.308 | --- | --- | 33 |
| 966  | hexamethonium bromide     | -0.09  | 5  | 0.308  | --- | --- | 20 |
| 967  | AR-A014418                | -0.199 | 3  | -0.308 | --- | --- | 33 |
| 968  | profenamine               | -0.152 | 4  | -0.308 | --- | --- | 25 |
| 969  | harpagoside               | -0.018 | 4  | -0.307 | --- | --- | 25 |
| 970  | nocodazole                | -0.121 | 6  | -0.307 | --- | --- | 33 |
| 971  | pipemidic acid            | 0.107  | 3  | 0.307  | --- | --- | 33 |
| 972  | 3-acetylcoumarin          | -0.17  | 5  | -0.307 | --- | --- | 40 |
| 973  | vinpocetine               | -0.161 | 4  | -0.307 | --- | --- | 25 |
| 974  | pirenperone               | 0.089  | 5  | -0.306 | --- | --- | 0  |
| 975  | 0175029-0000              | -0.086 | 6  | -0.306 | --- | --- | 33 |
| 976  | 10-methoxyharmalan        | -0.152 | 4  | -0.306 | --- | --- | 25 |
| 977  | Prestwick-972             | -0.159 | 3  | -0.305 | --- | --- | 33 |
| 978  | baclofen                  | -0.021 | 5  | -0.305 | --- | --- | 20 |
| 979  | oleandomycin              | -0.124 | 5  | -0.304 | --- | --- | 40 |
| 980  | ioversol                  | -0.123 | 4  | 0.304  | --- | --- | 0  |
| 981  | etiocholanolone           | -0.027 | 6  | -0.304 | --- | --- | 16 |
| 982  | 0225151-0000              | 0.114  | 3  | 0.304  | --- | --- | 33 |
| 983  | riboflavin                | -0.14  | 4  | -0.303 | --- | --- | 25 |
| 984  | etynodiol                 | -0.056 | 4  | -0.303 | --- | --- | 25 |
| 985  | dirithromycin             | 0.182  | 3  | 0.303  | --- | --- | 33 |
| 986  | urapidil                  | 0      | 4  | 0.302  | --- | --- | 0  |
| 987  | raloxifene                | 0.121  | 7  | 0.302  | --- | --- | 42 |
| 988  | hydralazine               | 0.066  | 6  | 0.302  | --- | --- | 16 |
| 989  | IC-86621                  | 0      | 4  | 0.301  | --- | --- | 0  |
| 990  | SR-95639A                 | 0.126  | 4  | -0.3   | --- | --- | 0  |
| 991  | chlorprothixene           | 0.122  | 4  | 0.299  | --- | --- | 25 |
| 992  | testosterone              | 0      | 5  | 0.299  | --- | --- | 0  |
| 993  | propylthiouracil          | -0.125 | 4  | 0.299  | --- | --- | 0  |
| 994  | betonicine                | -0.038 | 6  | 0.299  | --- | --- | 33 |
| 995  | spectinomycin             | -0.139 | 4  | -0.299 | --- | --- | 25 |
| 996  | dihydroergotamine         | -0.008 | 5  | 0.298  | --- | --- | 20 |
| 997  | meropenem                 | -0.146 | 4  | -0.298 | --- | --- | 25 |
| 998  | sulindac                  | 0.193  | 7  | 0.298  | --- | --- | 42 |
| 999  | tetroquinone              | 0      | 4  | 0.297  | --- | --- | 0  |
| 1000 | allantoin                 | -0.096 | 5  | -0.297 | --- | --- | 20 |
| 1001 | metixene                  | -0.006 | 4  | -0.297 | --- | --- | 25 |
| 1002 | pergolide                 | 0      | 4  | -0.297 | --- | --- | 0  |
| 1003 | prednisolone              | 0      | 5  | -0.296 | --- | --- | 0  |
| 1004 | AG-013608                 | -0.011 | 8  | 0.296  | --- | --- | 12 |
| 1005 | sulfaquinoxaline          | 0.043  | 3  | -0.296 | --- | --- | 33 |
| 1006 | sulfamethoxypyridazine    | -0.026 | 5  | 0.295  | --- | --- | 20 |
| 1007 | budesonide                | -0.164 | 4  | 0.295  | --- | --- | 0  |
| 1008 | tenoxicam                 | 0.102  | 4  | 0.295  | --- | --- | 25 |
| 1009 | betazole                  | -0.078 | 5  | 0.294  | --- | --- | 0  |
| 1010 | streptomycin              | 0.103  | 4  | -0.294 | --- | --- | 0  |
| 1011 | procarbazine              | 0      | 3  | 0.293  | --- | --- | 0  |
| 1012 | benfotiamine              | 0      | 5  | 0.293  | --- | --- | 0  |

|      |                           |        |    |        |     |     |    |
|------|---------------------------|--------|----|--------|-----|-----|----|
| 1013 | carbinoxamine             | -0.15  | 4  | -0.293 | --- | --- | 25 |
| 1014 | tetracaine                | 0.147  | 3  | 0.293  | --- | --- | 33 |
| 1015 | orphenadrine              | 0.103  | 6  | 0.293  | --- | --- | 16 |
| 1016 | acetohexamide             | 0.109  | 4  | 0.292  | --- | --- | 25 |
| 1017 | pyrimethamine             | -0.213 | 5  | -0.292 | --- | --- | 40 |
| 1018 | monastrol                 | -0.059 | 8  | -0.291 | --- | --- | 37 |
| 1019 | SC-19220                  | 0.132  | 4  | 0.29   | --- | --- | 25 |
| 1020 | prochlorperazine          | 0.055  | 16 | 0.289  | --- | --- | 12 |
| 1021 | azathioprine              | 0.019  | 7  | 0.289  | --- | --- | 28 |
| 1022 | asiaticoside              | 0.119  | 4  | -0.289 | --- | --- | 0  |
| 1023 | nifedipine                | -0.081 | 7  | 0.289  | --- | --- | 0  |
| 1024 | dimenhydrinate            | 0.122  | 4  | 0.289  | --- | --- | 25 |
| 1025 | amantadine                | 0.148  | 4  | 0.289  | --- | --- | 25 |
| 1026 | pregnenolone              | -0.2   | 4  | -0.288 | --- | --- | 25 |
| 1027 | alverine                  | -0.108 | 4  | -0.287 | --- | --- | 25 |
| 1028 | nafcillin                 | 0.098  | 4  | 0.287  | --- | --- | 25 |
| 1029 | palmatine                 | 0      | 4  | -0.287 | --- | --- | 0  |
| 1030 | bromopride                | -0.087 | 6  | -0.287 | --- | --- | 16 |
| 1031 | dapsone                   | 0.102  | 5  | -0.286 | --- | --- | 0  |
| 1032 | mephentermine             | -0.011 | 5  | 0.286  | --- | --- | 20 |
| 1033 | clenbuterol               | -0.013 | 5  | -0.286 | --- | --- | 20 |
| 1034 | methyldopa                | 0      | 5  | -0.286 | --- | --- | 0  |
| 1035 | 6-bromoindirubin-3'-oxime | 0.032  | 7  | -0.286 | --- | --- | 14 |
| 1036 | meticrane                 | -0.214 | 5  | -0.285 | --- | --- | 40 |
| 1037 | pirinixic acid            | -0.03  | 5  | 0.285  | --- | --- | 20 |
| 1038 | abamectin                 | 0      | 4  | 0.285  | --- | --- | 0  |
| 1039 | nitrofurantoin            | 0      | 5  | -0.284 | --- | --- | 0  |
| 1040 | fusidic acid              | -0.129 | 4  | -0.284 | --- | --- | 25 |
| 1041 | hydrastine hydrochloride  | -0.002 | 4  | 0.284  | --- | --- | 25 |
| 1042 | epivincamine              | -0.063 | 4  | -0.284 | --- | --- | 25 |
| 1043 | octopamine                | 0      | 4  | 0.284  | --- | --- | 0  |
| 1044 | nalidixic acid            | 0      | 5  | -0.284 | --- | --- | 0  |
| 1045 | fluorometholone           | -0.15  | 4  | 0.283  | --- | --- | 0  |
| 1046 | sotalol                   | 0      | 4  | 0.283  | --- | --- | 0  |
| 1047 | 0316684-0000              | 0.112  | 4  | -0.283 | --- | --- | 0  |
| 1048 | carbenoxolone             | 0.133  | 4  | 0.283  | --- | --- | 25 |
| 1049 | zalcitabine               | -0.168 | 4  | -0.283 | --- | --- | 25 |
| 1050 | fluvastatin               | -0.151 | 4  | 0.282  | --- | --- | 0  |
| 1051 | amitriptyline             | 0.077  | 6  | -0.282 | --- | --- | 0  |
| 1052 | benzylamine               | 0      | 4  | -0.282 | --- | --- | 0  |
| 1053 | fenspiride                | 0.055  | 5  | -0.282 | --- | --- | 20 |
| 1054 | bromocriptine             | -0.005 | 5  | 0.281  | --- | --- | 20 |
| 1055 | captopril                 | -0.006 | 5  | 0.281  | --- | --- | 20 |
| 1056 | fludrocortisone           | 0.107  | 8  | 0.28   | --- | --- | 37 |
| 1057 | carbarsone                | -0.116 | 4  | -0.28  | --- | --- | 25 |
| 1058 | probucol                  | -0.221 | 6  | -0.28  | --- | --- | 33 |
| 1059 | atropine oxide            | 0.119  | 5  | 0.279  | --- | --- | 20 |
| 1060 | benserazide               | 0      | 5  | -0.279 | --- | --- | 0  |
| 1061 | eticlopride               | 0.128  | 4  | 0.279  | --- | --- | 25 |
| 1062 | cytisine                  | 0      | 4  | 0.278  | --- | --- | 0  |
| 1063 | vancomycin                | 0.141  | 4  | 0.278  | --- | --- | 25 |
| 1064 | triamcinolone             | -0.16  | 5  | -0.278 | --- | --- | 40 |
| 1065 | amrinone                  | -0.036 | 4  | -0.277 | --- | --- | 25 |
| 1066 | clonidine                 | -0.025 | 4  | 0.277  | --- | --- | 25 |
| 1067 | memantine                 | 0.144  | 4  | 0.277  | --- | --- | 25 |
| 1068 | Prestwick-1084            | -0.139 | 4  | 0.277  | --- | --- | 0  |
| 1069 | dexpanthenol              | -0.192 | 4  | -0.277 | --- | --- | 25 |
| 1070 | luteolin                  | -0.099 | 4  | 0.276  | --- | --- | 0  |
| 1071 | thioperamide              | -0.024 | 5  | -0.276 | --- | --- | 20 |
| 1072 | scoulerine                | 0.019  | 4  | -0.276 | --- | --- | 25 |

|      |                      |        |   |        |     |     |    |
|------|----------------------|--------|---|--------|-----|-----|----|
| 1073 | bicuculline          | 0.144  | 4 | 0.275  | --- | --- | 25 |
| 1074 | methoxamine          | 0.103  | 4 | -0.275 | --- | --- | 0  |
| 1075 | carteolol            | -0.003 | 4 | -0.275 | --- | --- | 25 |
| 1076 | crotamiton           | -0.121 | 4 | -0.275 | --- | --- | 25 |
| 1077 | CAY-10397            | -0.03  | 3 | -0.274 | --- | --- | 33 |
| 1078 | amiprilose           | -0.037 | 4 | 0.274  | --- | --- | 25 |
| 1079 | thalidomide          | 0.042  | 7 | 0.274  | --- | --- | 14 |
| 1080 | santonin             | -0.091 | 4 | -0.274 | --- | --- | 25 |
| 1081 | doxycycline          | 0.082  | 5 | 0.274  | --- | --- | 20 |
| 1082 | PF-00875133-00       | 0.118  | 3 | 0.274  | --- | --- | 33 |
| 1083 | tolazoline           | -0.23  | 5 | -0.273 | --- | --- | 40 |
| 1084 | ketoprofen           | 0.022  | 6 | 0.273  | --- | --- | 33 |
| 1085 | levodopa             | -0.109 | 5 | -0.273 | --- | --- | 40 |
| 1086 | 4-hydroxyphenazone   | 0.093  | 5 | 0.273  | --- | --- | 40 |
| 1087 | riluzole             | 0      | 5 | -0.273 | --- | --- | 0  |
| 1088 | vinburnine           | 0.1    | 4 | 0.272  | --- | --- | 25 |
| 1089 | tiletamine           | 0.117  | 4 | -0.272 | --- | --- | 0  |
| 1090 | triprolidine         | -0.066 | 4 | 0.272  | --- | --- | 25 |
| 1091 | meptazinol           | -0.143 | 4 | 0.271  | --- | --- | 0  |
| 1092 | 0173570-0000         | -0.006 | 6 | 0.271  | --- | --- | 33 |
| 1093 | chloropyramine       | -0.081 | 4 | -0.271 | --- | --- | 25 |
| 1094 | propidium iodide     | -0.03  | 4 | 0.271  | --- | --- | 25 |
| 1095 | corynanthine         | 0      | 3 | -0.271 | --- | --- | 0  |
| 1096 | nicotinic acid       | 0.076  | 4 | 0.27   | --- | --- | 25 |
| 1097 | (-)-MK-801           | 0.11   | 4 | 0.27   | --- | --- | 25 |
| 1098 | tinidazole           | 0.029  | 6 | -0.27  | --- | --- | 16 |
| 1099 | stachydrine          | 0.133  | 4 | 0.27   | --- | --- | 25 |
| 1100 | SB-203580            | 0.116  | 5 | 0.269  | --- | --- | 20 |
| 1101 | pivampicillin        | -0.154 | 4 | 0.268  | --- | --- | 0  |
| 1102 | thiamine             | 0.17   | 3 | 0.268  | --- | --- | 33 |
| 1103 | aminophenazone       | 0.081  | 5 | 0.267  | --- | --- | 20 |
| 1104 | celecoxib            | -0.133 | 5 | -0.267 | --- | --- | 40 |
| 1105 | cotinine             | -0.166 | 6 | -0.267 | --- | --- | 33 |
| 1106 | amiloride            | 0.116  | 5 | 0.267  | --- | --- | 40 |
| 1107 | PF-00562151-00       | -0.005 | 8 | -0.266 | --- | --- | 25 |
| 1108 | levothyroxine sodium | 0.11   | 4 | 0.265  | --- | --- | 25 |
| 1109 | sulfaquanidine       | -0.021 | 5 | 0.264  | --- | --- | 20 |
| 1110 | etamsylate           | -0.156 | 4 | -0.264 | --- | --- | 25 |
| 1111 | lovastatin           | 0.134  | 4 | 0.264  | --- | --- | 25 |
| 1112 | pentolonium          | -0.097 | 5 | -0.262 | --- | --- | 20 |
| 1113 | norfloxacin          | -0.088 | 5 | -0.262 | --- | --- | 20 |
| 1114 | bumetanide           | 0.007  | 4 | -0.262 | --- | --- | 25 |
| 1115 | epitiostanol         | -0.068 | 4 | 0.262  | --- | --- | 25 |
| 1116 | heptaminol           | 0.175  | 5 | 0.262  | --- | --- | 40 |
| 1117 | pentamidine          | -0.188 | 5 | -0.262 | --- | --- | 40 |
| 1118 | felodipine           | -0.164 | 7 | -0.261 | --- | --- | 28 |
| 1119 | phenylpropanolamine  | -0.131 | 4 | -0.261 | --- | --- | 25 |
| 1120 | phentolamine         | -0.002 | 7 | -0.261 | --- | --- | 14 |
| 1121 | noscapine            | 0      | 4 | 0.26   | --- | --- | 0  |
| 1122 | morantel             | -0.069 | 5 | 0.26   | --- | --- | 20 |
| 1123 | anabasine            | -0.199 | 3 | -0.259 | --- | --- | 33 |
| 1124 | Prestwick-1085       | 0      | 4 | 0.259  | --- | --- | 0  |
| 1125 | betahistine          | -0.174 | 4 | -0.259 | --- | --- | 25 |
| 1126 | sulfadiazine         | -0.051 | 5 | 0.259  | --- | --- | 20 |
| 1127 | midodrine            | 0.013  | 5 | -0.259 | --- | --- | 20 |
| 1128 | gramine              | -0.205 | 4 | -0.259 | --- | --- | 25 |
| 1129 | calcium pantothenate | -0.147 | 4 | -0.258 | --- | --- | 25 |
| 1130 | debrisoquine         | -0.017 | 4 | -0.258 | --- | --- | 25 |
| 1131 | paracetamol          | 0      | 4 | 0.258  | --- | --- | 0  |
| 1132 | rilmenidine          | 0.119  | 4 | -0.257 | --- | --- | 0  |
| 1133 | tetracycline         | 0.082  | 5 | 0.257  | --- | --- | 40 |

|      |                       |        |    |        |     |     |    |
|------|-----------------------|--------|----|--------|-----|-----|----|
| 1134 | kinetin               | 0      | 4  | -0.256 | --- | --- | 0  |
| 1135 | aztreonam             | -0.114 | 5  | -0.256 | --- | --- | 20 |
| 1136 | naltrexone            | -0.2   | 5  | -0.256 | --- | --- | 40 |
| 1137 | ethisterone           | -0.044 | 6  | -0.256 | --- | --- | 16 |
| 1138 | benzthiazide          | 0      | 4  | -0.256 | --- | --- | 0  |
| 1139 | tranexamic acid       | 0.149  | 5  | 0.255  | --- | --- | 40 |
| 1140 | flurbiprofen          | -0.165 | 5  | -0.255 | --- | --- | 40 |
| 1141 | N6-methyladenosine    | 0.002  | 4  | -0.255 | --- | --- | 25 |
| 1142 | famotidine            | 0.082  | 5  | 0.255  | --- | --- | 40 |
| 1143 | ethotoin              | -0.081 | 6  | -0.255 | --- | --- | 16 |
| 1144 | enoxacin              | 0      | 4  | 0.255  | --- | --- | 0  |
| 1145 | flutamide             | -0.059 | 5  | -0.254 | --- | --- | 40 |
| 1146 | tamoxifen             | 0.005  | 7  | -0.253 | --- | --- | 14 |
| 1147 | halcinonide           | 0.007  | 5  | 0.253  | --- | --- | 40 |
| 1148 | pancuronium bromide   | -0.087 | 4  | 0.253  | --- | --- | 0  |
| 1149 | pramocaine            | -0.082 | 5  | -0.252 | --- | --- | 20 |
| 1150 | spironolactone        | -0.05  | 5  | 0.252  | --- | --- | 20 |
| 1151 | wortmannin            | -0.035 | 18 | -0.252 | --- | --- | 22 |
| 1152 | tyloxapol             | -0.081 | 4  | -0.252 | --- | --- | 25 |
| 1153 | phenelzine            | -0.069 | 6  | -0.252 | --- | --- | 16 |
| 1154 | ramifenazone          | 0.11   | 4  | 0.252  | --- | --- | 25 |
| 1155 | sparteine             | 0.149  | 4  | 0.252  | --- | --- | 25 |
| 1156 | mefexamide            | 0.139  | 4  | 0.251  | --- | --- | 25 |
| 1157 | harmine               | -0.137 | 4  | 0.25   | --- | --- | 0  |
| 1158 | naftidrofuryl         | -0.186 | 4  | -0.25  | --- | --- | 25 |
| 1159 | carisoprodol          | 0.204  | 4  | 0.25   | --- | --- | 25 |
| 1160 | salbutamol            | -0.085 | 5  | -0.25  | --- | --- | 40 |
| 1161 | indapamide            | 0.034  | 6  | -0.25  | --- | --- | 16 |
| 1162 | sodium phenylbutyrate | 0.127  | 7  | 0.249  | --- | --- | 28 |
| 1163 | lidocaine             | 0.119  | 5  | 0.249  | --- | --- | 20 |
| 1164 | Prestwick-864         | 0.149  | 4  | 0.248  | --- | --- | 25 |
| 1165 | tridihexethyl         | 0.185  | 4  | 0.248  | --- | --- | 25 |
| 1166 | iocetamic acid        | 0.008  | 4  | -0.248 | --- | --- | 25 |
| 1167 | carmustine            | 0.146  | 3  | 0.247  | --- | --- | 33 |
| 1168 | zimeldine             | -0.018 | 5  | 0.247  | --- | --- | 20 |
| 1169 | methyldopate          | 0.152  | 4  | 0.247  | --- | --- | 25 |
| 1170 | kawain                | 0.087  | 5  | 0.247  | --- | --- | 20 |
| 1171 | spiramycin            | -0.163 | 6  | -0.247 | --- | --- | 33 |
| 1172 | Trolox C              | -0.106 | 4  | -0.247 | --- | --- | 25 |
| 1173 | pirenzepine           | -0.188 | 5  | -0.246 | --- | --- | 40 |
| 1174 | ornidazole            | 0.006  | 5  | 0.246  | --- | --- | 20 |
| 1175 | succinylsulfathiazole | 0      | 4  | 0.246  | --- | --- | 0  |
| 1176 | ciclopirox            | 0.17   | 4  | 0.244  | --- | --- | 25 |
| 1177 | berberine             | -0.178 | 4  | 0.244  | --- | --- | 0  |
| 1178 | 6-benzylaminopurine   | -0.071 | 5  | -0.243 | --- | --- | 20 |
| 1179 | fluvoxamine           | -0.141 | 4  | 0.243  | --- | --- | 0  |
| 1180 | digoxigenin           | 0.092  | 5  | -0.243 | --- | --- | 0  |
| 1181 | practolol             | 0.021  | 4  | 0.243  | --- | --- | 25 |
| 1182 | PF-00539758-00        | 0.15   | 3  | 0.243  | --- | --- | 33 |
| 1183 | oxantel               | 0.074  | 4  | 0.242  | --- | --- | 25 |
| 1184 | dienestrol            | -0.187 | 3  | -0.242 | --- | --- | 33 |
| 1185 | bemegride             | 0.117  | 4  | -0.242 | --- | --- | 0  |
| 1186 | ciprofloxacin         | -0.073 | 5  | -0.242 | --- | --- | 40 |
| 1187 | metamizole sodium     | -0.061 | 6  | -0.241 | --- | --- | 16 |
| 1188 | tretinoin             | -0.01  | 22 | 0.24   | --- | --- | 9  |
| 1189 | canavanine            | 0.025  | 3  | -0.24  | --- | --- | 33 |
| 1190 | flufenamic acid       | -0.194 | 6  | -0.238 | --- | --- | 33 |
| 1191 | estradiol             | -0.043 | 37 | -0.238 | --- | --- | 21 |
| 1192 | neomycin              | -0.109 | 5  | -0.238 | --- | --- | 40 |
| 1193 | dexamethasone         | 0.076  | 8  | 0.238  | --- | --- | 25 |
| 1194 | Prestwick-1100        | 0.089  | 4  | 0.238  | --- | --- | 25 |

|      |                         |        |    |        |     |     |    |
|------|-------------------------|--------|----|--------|-----|-----|----|
| 1195 | ritodrine               | 0      | 4  | 0.238  | --- | --- | 0  |
| 1196 | harmaline               | 0.155  | 4  | 0.237  | --- | --- | 25 |
| 1197 | noretynodrel            | -0.035 | 4  | -0.237 | --- | --- | 25 |
| 1198 | apramycin               | -0.185 | 4  | 0.237  | --- | --- | 0  |
| 1199 | demeclocycline          | -0.017 | 6  | 0.237  | --- | --- | 16 |
| 1200 | ricinine                | -0.19  | 4  | -0.236 | --- | --- | 25 |
| 1201 | mepenzolate bromide     | -0.131 | 5  | -0.236 | --- | --- | 40 |
| 1202 | miconazole              | -0.034 | 5  | 0.236  | --- | --- | 20 |
| 1203 | cefapirin               | 0.019  | 4  | 0.235  | --- | --- | 25 |
| 1204 | nefopam                 | -0.111 | 5  | -0.235 | --- | --- | 40 |
| 1205 | ozagrel                 | 0      | 4  | 0.235  | --- | --- | 0  |
| 1206 | simvastatin             | -0.183 | 4  | -0.235 | --- | --- | 25 |
| 1207 | midecamycin             | 0.071  | 5  | 0.234  | --- | --- | 20 |
| 1208 | dexibuprofen            | 0.02   | 4  | -0.234 | --- | --- | 25 |
| 1209 | cyanocobalamin          | -0.091 | 4  | -0.233 | --- | --- | 25 |
| 1210 | amodiaquine             | -0.034 | 4  | 0.233  | --- | --- | 25 |
| 1211 | isotretinoin            | 0.021  | 4  | -0.233 | --- | --- | 25 |
| 1212 | ribostamycin            | 0      | 4  | 0.233  | --- | --- | 0  |
| 1213 | sulfadimidine           | 0.07   | 6  | 0.233  | --- | --- | 33 |
| 1214 | benzamil                | -0.01  | 6  | 0.232  | --- | --- | 33 |
| 1215 | clioquinol              | 0.082  | 5  | 0.232  | --- | --- | 20 |
| 1216 | valproic acid           | 0.065  | 57 | 0.232  | --- | --- | 26 |
| 1217 | S-propranolol           | -0.13  | 4  | -0.231 | --- | --- | 25 |
| 1218 | 3-hydroxy-DL-kynurenine | -0.136 | 6  | -0.231 | --- | --- | 33 |
| 1219 | lactobionic acid        | 0.151  | 4  | 0.23   | --- | --- | 25 |
| 1220 | alpha-estradiol         | -0.189 | 16 | -0.23  | --- | --- | 37 |
| 1221 | azaperone               | -0.14  | 4  | -0.23  | --- | --- | 25 |
| 1222 | leflunomide             | -0.028 | 4  | -0.23  | --- | --- | 25 |
| 1223 | acebutolol              | 0.093  | 5  | -0.23  | --- | --- | 0  |
| 1224 | eldeline                | 0.046  | 6  | 0.23   | --- | --- | 16 |
| 1225 | fluticasone             | 0.113  | 4  | 0.23   | --- | --- | 25 |
| 1226 | monocrotaline           | -0.047 | 4  | -0.229 | --- | --- | 25 |
| 1227 | thiopropazine           | 0.114  | 5  | 0.229  | --- | --- | 20 |
| 1228 | terguride               | -0.056 | 8  | 0.229  | --- | --- | 12 |
| 1229 | meclozine               | -0.036 | 5  | 0.228  | --- | --- | 20 |
| 1230 | H-89                    | -0.173 | 3  | -0.228 | --- | --- | 33 |
| 1231 | maprotiline             | 0.149  | 4  | 0.228  | --- | --- | 25 |
| 1232 | kanamycin               | 0.067  | 4  | 0.227  | --- | --- | 25 |
| 1233 | cefixime                | 0.147  | 4  | 0.226  | --- | --- | 25 |
| 1234 | nifurtimox              | -0.062 | 4  | 0.226  | --- | --- | 25 |
| 1235 | nystatin                | 0.135  | 3  | 0.226  | --- | --- | 33 |
| 1236 | nifenazone              | -0.053 | 5  | -0.225 | --- | --- | 20 |
| 1237 | mometasone              | -0.173 | 4  | -0.225 | --- | --- | 25 |
| 1238 | mephesisin              | -0.135 | 5  | -0.225 | --- | --- | 40 |
| 1239 | lomefloxacin            | -0.002 | 6  | 0.225  | --- | --- | 16 |
| 1240 | isocarboxazid           | -0.007 | 5  | -0.224 | --- | --- | 20 |
| 1241 | butamben                | 0.081  | 4  | -0.224 | --- | --- | 0  |
| 1242 | glipizide               | 0.062  | 5  | 0.224  | --- | --- | 20 |
| 1243 | verapamil               | -0.023 | 6  | 0.224  | --- | --- | 16 |
| 1244 | dacarbazine             | 0      | 4  | 0.224  | --- | --- | 0  |
| 1245 | chlormezanone           | -0.002 | 4  | -0.224 | --- | --- | 25 |
| 1246 | azacyclonol             | -0.014 | 5  | -0.222 | --- | --- | 20 |
| 1247 | nomifensine             | -0.123 | 5  | 0.222  | --- | --- | 0  |
| 1248 | sulfamethizole          | 0      | 4  | 0.222  | --- | --- | 0  |
| 1249 | PHA-00851261E           | 0.071  | 8  | 0.221  | --- | --- | 37 |
| 1250 | acetylsalicylic acid    | -0.056 | 13 | 0.22   | --- | --- | 7  |
| 1251 | PHA-00745360            | 0.119  | 8  | -0.22  | --- | --- | 0  |
| 1252 | betulinic acid          | 0.13   | 4  | -0.22  | --- | --- | 0  |
| 1253 | sulfadoxine             | -0.171 | 3  | -0.219 | --- | --- | 33 |
| 1254 | gibberellic acid        | 0.104  | 4  | 0.217  | --- | --- | 25 |

|      |                           |        |    |        |     |     |    |
|------|---------------------------|--------|----|--------|-----|-----|----|
| 1255 | harmalol                  | -0.012 | 3  | 0.216  | --- | --- | 33 |
| 1256 | clindamycin               | -0.026 | 5  | -0.215 | --- | --- | 20 |
| 1257 | diclofenamide             | 0      | 4  | 0.215  | --- | --- | 0  |
| 1258 | metampicillin             | 0.106  | 5  | -0.215 | --- | --- | 0  |
| 1259 | edrophonium chloride      | -0.006 | 5  | -0.214 | --- | --- | 20 |
| 1260 | zuclopenthixol            | 0.139  | 4  | 0.214  | --- | --- | 25 |
| 1261 | metolazone                | -0.04  | 5  | -0.213 | --- | --- | 20 |
| 1262 | piromidic acid            | -0.107 | 4  | 0.213  | --- | --- | 0  |
| 1263 | foliosidine               | 0      | 6  | -0.212 | --- | --- | 16 |
| 1264 | Prestwick-642             | 0.132  | 4  | -0.211 | --- | --- | 0  |
| 1265 | prilocaine                | -0.063 | 6  | -0.211 | --- | --- | 33 |
| 1266 | R-atenolol                | -0.126 | 4  | -0.211 | --- | --- | 25 |
| 1267 | mesalazine                | 0.024  | 5  | -0.209 | --- | --- | 20 |
| 1268 | N-acetylmuramic acid      | 0.056  | 4  | 0.207  | --- | --- | 25 |
| 1269 | ketotifen                 | 0.092  | 4  | 0.207  | --- | --- | 25 |
| 1270 | pralidoxime               | 0.122  | 4  | 0.206  | --- | --- | 25 |
| 1271 | erythromycin              | 0.089  | 5  | 0.205  | --- | --- | 20 |
| 1272 | heliotrine                | -0.187 | 6  | -0.205 | --- | --- | 33 |
| 1273 | dizocilpine               | 0.001  | 5  | -0.204 | --- | --- | 20 |
| 1274 | nordihydroguaiaretic acid | -0.166 | 15 | -0.204 | --- | --- | 33 |
| 1275 | sulfathiazole             | 0.039  | 5  | -0.203 | --- | --- | 20 |
| 1276 | altretamine               | -0.046 | 4  | 0.203  | --- | --- | 25 |
| 1277 | tolbutamide               | -0.033 | 7  | -0.203 | --- | --- | 14 |
| 1278 | diclofenac                | 0.077  | 5  | 0.2    | --- | --- | 20 |
| 1279 | tonzonium bromide         | -0.027 | 4  | -0.199 | --- | --- | 25 |
| 1280 | tremorine                 | -0.035 | 4  | 0.199  | --- | --- | 25 |
| 1281 | paclitaxel                | 0.006  | 6  | -0.199 | --- | --- | 16 |
| 1282 | sulfametoxydiazine        | -0.15  | 4  | -0.197 | --- | --- | 25 |
| 1283 | flucloxacillin            | -0.068 | 4  | 0.196  | --- | --- | 25 |
| 1284 | chlortalidone             | 0.081  | 4  | 0.194  | --- | --- | 25 |
| 1285 | tropine                   | 0.109  | 4  | 0.194  | --- | --- | 25 |
| 1286 | deferoxamine              | -0.055 | 8  | 0.193  | --- | --- | 25 |
| 1287 | LY-294002                 | -0.117 | 61 | -0.192 | --- | --- | 29 |
| 1288 | phenindione               | -0.157 | 4  | -0.191 | --- | --- | 25 |
| 1289 | sulpiride                 | -0.034 | 5  | 0.19   | --- | --- | 20 |
| 1290 | semustine                 | -0.127 | 4  | -0.19  | --- | --- | 25 |
| 1291 | picotamide                | 0.008  | 5  | 0.189  | --- | --- | 20 |
| 1292 | genistein                 | 0.082  | 17 | -0.189 | --- | --- | 5  |
| 1293 | capsaicin                 | -0.013 | 4  | 0.185  | --- | --- | 25 |
| 1294 | tribenoside               | 0.017  | 4  | -0.181 | --- | --- | 25 |
| 1295 | hydroxyzine               | 0.012  | 5  | -0.181 | --- | --- | 20 |
| 1296 | alfuzosin                 | -0.107 | 5  | -0.18  | --- | --- | 20 |
| 1297 | famprofazone              | -0.087 | 6  | -0.179 | --- | --- | 33 |
| 1298 | levonorgestrel            | -0.135 | 6  | -0.178 | --- | --- | 33 |
| 1299 | pioglitazone              | 0.038  | 11 | -0.178 | --- | --- | 9  |
| 1300 | furaltadone               | -0.102 | 6  | -0.176 | --- | --- | 33 |
| 1301 | mebeverine                | -0.038 | 4  | -0.176 | --- | --- | 25 |
| 1302 | pimozide                  | -0.148 | 4  | 0.174  | --- | --- | 0  |
| 1303 | fulvestrant               | -0.101 | 40 | -0.166 | --- | --- | 25 |
| 1304 | 15-delta prostaglandin J2 | -0.13  | 15 | -0.164 | --- | --- | 26 |
| 1305 | tropicamide               | -0.084 | 6  | 0.162  | --- | --- | 16 |
| 1306 | proglumide                | -0.012 | 5  | 0.154  | --- | --- | 20 |
| 1307 | alclometasone             | -0.028 | 4  | -0.132 | --- | --- | 25 |
| 1308 | sirolimus                 | -0.077 | 44 | -0.115 | --- | --- | 20 |
| 1309 | haloperidol               | -0.018 | 32 | -0.113 | --- | --- | 12 |
