# Supplementary material for: Genomic and immunological profiles of small-cell lung cancer between East Asians and Caucasian
Source: Springer Nature journal article supplement (doi:10.1186/s12935-022-02588-w), 2022-04-29
Supplement: MOESM15 [file 20359852]

**Supplementary Table.6 Related to Supplementary Fig. 5a The results of the CMap analysis of the Caucasian cohort (TP53/RB1 co-mutations vs No alterations in TP53/RB1).**

| rank | cmap name           | mean   | n   | enrichment | p       | specificity | percent non-null |
|------|---------------------|--------|-----|------------|---------|-------------|------------------|
| 1    | thioridazine        | -0.451 | 20  | -0.598     | 0       | 0.0645      | 80               |
| 2    | LY-294002           | -0.367 | 61  | -0.47      | 0       | 0.0614      | 72               |
| 3    | trichostatin A      | -0.276 | 182 | -0.268     | 0       | 0.6238      | 59               |
| 4    | sirolimus           | -0.283 | 44  | -0.339     | 0.00008 | 0.2466      | 56               |
| 5    | thapsigargin        | 0.664  | 3   | 0.951      | 0.0001  | 0.0955      | 100              |
| 6    | alpha-estradiol     | -0.43  | 16  | -0.527     | 0.00012 | 0           | 87               |
| 7    | oxybenzone          | 0.507  | 4   | 0.864      | 0.00046 | 0           | 100              |
| 8    | semustine           | 0.488  | 4   | 0.854      | 0.00062 | 0.0678      | 100              |
| 9    | tanespimycin        | -0.221 | 62  | -0.252     | 0.00064 | 0.4538      | 50               |
| 10   | iopamidol           | 0.457  | 4   | 0.834      | 0.00115 | 0.0063      | 75               |
| 11   | vincamine           | 0.414  | 6   | 0.705      | 0.00175 | 0           | 83               |
| 12   | ethotoin            | -0.473 | 6   | -0.69      | 0.00215 | 0.0052      | 100              |
| 13   | tonzonium bromide   | -0.529 | 4   | -0.807     | 0.00271 | 0.0172      | 100              |
| 14   | lanatoside C        | -0.469 | 6   | -0.68      | 0.0029  | 0.0851      | 83               |
| 15   | pioglitazone        | 0.231  | 11  | 0.502      | 0.00394 | 0.034       | 63               |
| 16   | neostigmine bromide | 0.294  | 4   | 0.783      | 0.00414 | 0.0073      | 50               |
| 17   | trazodone           | -0.574 | 3   | -0.869     | 0.00443 | 0.0225      | 100              |
| 18   | amoxicillin         | -0.567 | 4   | -0.781     | 0.00471 | 0.0222      | 100              |
| 19   | melatonin           | 0.45   | 4   | 0.776      | 0.00477 | 0.0128      | 75               |
| 20   | zimeidine           | -0.429 | 5   | -0.696     | 0.00571 | 0.0275      | 100              |
| 21   | prochlorperazine    | -0.328 | 16  | -0.408     | 0.00648 | 0.1415      | 68               |
| 22   | valproic acid       | -0.207 | 57  | -0.219     | 0.00733 | 0.2688      | 54               |
| 23   | xylometazoline      | -0.497 | 4   | -0.752     | 0.00762 | 0.0166      | 100              |
| 24   | cloperastine        | -0.413 | 6   | -0.628     | 0.0083  | 0.042       | 83               |
| 25   | harmine             | -0.528 | 4   | -0.735     | 0.00979 | 0.0553      | 100              |
| 26   | fluphenazine        | -0.28  | 18  | -0.373     | 0.00996 | 0.1429      | 61               |
| 27   | hesperidin          | 0.32   | 4   | 0.729      | 0.01076 | 0.0073      | 50               |
| 28   | DL-thiorphan        | -0.633 | 2   | -0.928     | 0.01093 | 0.0227      | 100              |
| 29   | merbromin           | 0.496  | 5   | 0.661      | 0.01192 | 0.0741      | 80               |
| 30   | piperidolate        | -0.568 | 3   | -0.817     | 0.01208 | 0.0361      | 100              |
| 31   | valinomycin         | 0.196  | 4   | 0.72       | 0.01231 | 0.1512      | 50               |
| 32   | helveticoside       | -0.423 | 6   | -0.607     | 0.01236 | 0.0779      | 83               |
| 33   | sulfafurazole       | -0.486 | 5   | -0.652     | 0.01256 | 0.0739      | 100              |
| 34   | florfenicol         | -0.506 | 4   | -0.717     | 0.01287 | 0.0252      | 100              |
| 35   | digoxigenin         | -0.405 | 5   | -0.649     | 0.01316 | 0.0952      | 80               |
| 36   | xamoterol           | 0.435  | 3   | 0.81       | 0.01392 | 0.0181      | 66               |
| 37   | trimetazidine       | -0.516 | 4   | -0.705     | 0.01564 | 0.0924      | 100              |
| 38   | cefapirin           | 0.236  | 4   | 0.705      | 0.01583 | 0.0154      | 50               |
| 39   | proscillaridin      | -0.643 | 3   | -0.798     | 0.01695 | 0.0546      | 100              |
| 40   | naringenin          | 0.453  | 4   | 0.698      | 0.01721 | 0.1383      | 75               |
| 41   | altizide            | 0.196  | 4   | 0.697      | 0.01743 | 0           | 50               |
| 42   | blebbistatin        | -0.616 | 2   | -0.907     | 0.01746 | 0.027       | 100              |
| 43   | meteneprost         | 0.388  | 4   | 0.697      | 0.01757 | 0.087       | 75               |
| 44   | diltiazem           | -0.451 | 5   | -0.626     | 0.01882 | 0.0729      | 80               |
| 45   | bromperidol         | -0.553 | 3   | -0.79      | 0.01893 | 0.0121      | 100              |
| 46   | ergocalciferol      | 0.321  | 4   | 0.688      | 0.02001 | 0.0184      | 50               |
| 47   | cloxacillin         | 0.448  | 4   | 0.687      | 0.02035 | 0.0272      | 75               |
| 48   | nadolol             | 0.488  | 4   | 0.686      | 0.02043 | 0.2418      | 75               |
| 49   | tretinoin           | -0.261 | 22  | -0.31      | 0.02218 | 0.2206      | 59               |
| 50   | loperamide          | -0.367 | 6   | -0.57      | 0.0229  | 0.1316      | 83               |
| 51   | zoxazolamine        | -0.487 | 4   | -0.677     | 0.02407 | 0.0606      | 100              |
| 52   | digitoxigenin       | -0.557 | 4   | -0.677     | 0.02435 | 0.0784      | 100              |
| 53   | dacarbazine         | -0.455 | 4   | -0.675     | 0.02473 | 0.0259      | 75               |
| 54   | oxymetazoline       | -0.42  | 4   | -0.673     | 0.02564 | 0.0181      | 100              |
| 55   | galantamine         | -0.464 | 4   | -0.672     | 0.02598 | 0.0054      | 75               |
| 56   | pilocarpine         | 0.3    | 4   | 0.668      | 0.02682 | 0.1132      | 50               |

|     |                    |        |    |        |         |        |     |
|-----|--------------------|--------|----|--------|---------|--------|-----|
| 57  | vorinostat         | -0.327 | 12 | -0.404 | 0.02796 | 0.5575 | 66  |
| 58  | mepacrine          | -0.594 | 2  | -0.882 | 0.02819 | 0.0583 | 100 |
| 59  | Prestwick-559      | -0.539 | 3  | -0.758 | 0.02924 | 0.0667 | 100 |
| 60  | digoxin            | -0.521 | 4  | -0.66  | 0.03018 | 0.1122 | 75  |
| 61  | gliclazide         | -0.437 | 4  | -0.656 | 0.03223 | 0.125  | 75  |
| 62  | terfenadine        | -0.51  | 3  | -0.749 | 0.03237 | 0.1376 | 100 |
| 63  | indoprofen         | 0.4    | 4  | 0.656  | 0.03256 | 0.0679 | 75  |
| 64  | solanine           | -0.512 | 4  | -0.653 | 0.03378 | 0.0656 | 100 |
| 65  | zardaverine        | 0.17   | 4  | 0.651  | 0.03489 | 0.0652 | 75  |
| 66  | mesoridazine       | -0.378 | 4  | -0.647 | 0.0367  | 0.0437 | 75  |
| 67  | ouabain            | -0.507 | 4  | -0.645 | 0.03774 | 0.1053 | 75  |
| 68  | promazine          | -0.403 | 6  | -0.536 | 0.03995 | 0.0634 | 83  |
| 69  | cyproheptadine     | -0.332 | 5  | -0.577 | 0.04055 | 0.0318 | 80  |
| 70  | ambroxol           | 0.433  | 4  | 0.64   | 0.04074 | 0.1438 | 75  |
| 71  | rilmenidine        | -0.153 | 4  | -0.638 | 0.04098 | 0.0685 | 50  |
| 72  | artemisinin        | -0.454 | 3  | -0.727 | 0.04194 | 0.0181 | 100 |
| 73  | norcyclobenzaprine | -0.444 | 4  | -0.635 | 0.04337 | 0.1318 | 75  |
| 74  | bumetanide         | 0.402  | 4  | 0.634  | 0.04404 | 0.2012 | 75  |
| 75  | acemetacin         | 0.496  | 4  | 0.634  | 0.04434 | 0.0787 | 75  |
| 76  | metixene           | -0.354 | 4  | -0.629 | 0.04657 | 0.0923 | 75  |
| 77  | cetirizine         | -0.408 | 4  | -0.628 | 0.04733 | 0.1691 | 75  |
| 78  | imatinib           | 0.356  | 2  | 0.845  | 0.04829 | 0.0309 | 100 |
| 79  | dilazep            | -0.451 | 5  | -0.563 | 0.0485  | 0.0966 | 80  |
| 80  | parthenolide       | -0.189 | 4  | -0.625 | 0.04884 | 0.2621 | 50  |
| 81  | lincomycin         | 0.377  | 3  | 0.708  | 0.04891 | 0.0236 | 66  |
| 82  | danazol            | 0.368  | 4  | 0.626  | 0.04916 | 0.0303 | 75  |
| 83  | F0447-0125         | 0.247  | 4  | 0.623  | 0.05047 | 0.1231 | 50  |
| 84  | ketanserine        | -0.418 | 4  | -0.622 | 0.05081 | 0.0538 | 75  |
| 85  | ramipril           | 0.249  | 4  | 0.621  | 0.05182 | 0.0301 | 50  |
| 86  | ethambutol         | -0.296 | 5  | -0.558 | 0.05187 | 0.0281 | 80  |
| 87  | piretanide         | 0.249  | 4  | 0.62   | 0.05246 | 0.053  | 75  |
| 88  | hydroflumethiazide | -0.337 | 5  | -0.555 | 0.05435 | 0.067  | 60  |
| 89  | paromomycin        | 0.233  | 4  | 0.616  | 0.05546 | 0.012  | 50  |
| 90  | folic acid         | 0.316  | 4  | 0.616  | 0.05556 | 0.0568 | 75  |
| 91  | colistin           | 0.415  | 4  | 0.615  | 0.05624 | 0.1813 | 75  |
| 92  | etacrynic acid     | -0.412 | 3  | -0.697 | 0.05671 | 0.024  | 100 |
| 93  | dicoumarol         | -0.293 | 6  | -0.51  | 0.05769 | 0.0167 | 50  |
| 94  | diethylstilbestrol | 0.348  | 6  | 0.509  | 0.05778 | 0.3579 | 66  |
| 95  | trifluoperazine    | -0.271 | 16 | -0.32  | 0.05798 | 0.3846 | 50  |
| 96  | astemizole         | -0.4   | 5  | -0.549 | 0.05892 | 0.2574 | 80  |
| 97  | homochlorcyclizine | -0.362 | 4  | -0.61  | 0.05916 | 0.125  | 75  |
| 98  | nocodazole         | -0.244 | 6  | -0.507 | 0.05983 | 0.1774 | 50  |
| 99  | bisacodyl          | -0.432 | 4  | -0.608 | 0.06077 | 0.0887 | 75  |
| 100 | imidurea           | -0.427 | 3  | -0.688 | 0.06133 | 0.1081 | 100 |
| 101 | S-propranolol      | -0.429 | 4  | -0.605 | 0.06306 | 0.0366 | 75  |
| 102 | daunorubicin       | -0.427 | 4  | -0.605 | 0.06338 | 0.2456 | 75  |
| 103 | 5194442            | 0.305  | 4  | 0.604  | 0.06378 | 0.0968 | 75  |
| 104 | pramocaine         | -0.32  | 5  | -0.543 | 0.06416 | 0.0617 | 80  |
| 105 | ondansetron        | 0.378  | 4  | 0.603  | 0.06461 | 0.1453 | 75  |
| 106 | cefotiam           | 0.348  | 4  | 0.602  | 0.06541 | 0.1329 | 75  |
| 107 | sulfametoxydiazine | -0.433 | 4  | -0.597 | 0.06976 | 0.1748 | 75  |
| 108 | colchicine         | -0.355 | 6  | -0.496 | 0.0698  | 0.0916 | 83  |
| 109 | beta-escin         | -0.357 | 6  | -0.496 | 0.06996 | 0.1074 | 66  |
| 110 | Prestwick-981      | -0.438 | 3  | -0.673 | 0.07023 | 0.0244 | 100 |
| 111 | ciprofibrate       | 0.219  | 4  | 0.592  | 0.07321 | 0.0592 | 75  |
| 112 | praziquantel       | 0.316  | 4  | 0.591  | 0.07376 | 0.0592 | 75  |
| 113 | apigenin           | -0.437 | 4  | -0.591 | 0.0749  | 0.3261 | 75  |
| 114 | bromocriptine      | -0.388 | 5  | -0.531 | 0.07516 | 0.1462 | 80  |
| 115 | vitexin            | -0.301 | 4  | -0.59  | 0.07571 | 0.0405 | 50  |
| 116 | sulfadimethoxine   | 0.359  | 5  | 0.532  | 0.07648 | 0.3898 | 60  |
| 117 | amikacin           | 0.261  | 4  | 0.587  | 0.07683 | 0.0177 | 50  |

|     |                         |        |    |        |         |        |    |
|-----|-------------------------|--------|----|--------|---------|--------|----|
| 118 | amiodarone              | -0.362 | 5  | -0.529 | 0.07686 | 0.2275 | 80 |
| 119 | piperacetazine          | -0.271 | 4  | -0.588 | 0.0776  | 0.1168 | 50 |
| 120 | bacampicillin           | 0.155  | 4  | 0.586  | 0.07788 | 0.0904 | 50 |
| 121 | (-)-MK-801              | -0.403 | 4  | -0.586 | 0.07961 | 0.0919 | 75 |
| 122 | gabapentin              | -0.305 | 4  | -0.586 | 0.07997 | 0.0833 | 75 |
| 123 | trimipramine            | -0.369 | 4  | -0.585 | 0.08039 | 0.0236 | 75 |
| 124 | 5211181                 | 0.333  | 2  | 0.798  | 0.08185 | 0.0848 | 50 |
| 125 | isoetarine              | -0.447 | 4  | -0.581 | 0.08445 | 0.0988 | 75 |
| 126 | chloroquine             | -0.331 | 4  | -0.579 | 0.08645 | 0.0796 | 75 |
| 127 | bepidil                 | -0.399 | 4  | -0.578 | 0.08749 | 0.2121 | 75 |
| 128 | perhexiline             | -0.422 | 4  | -0.57  | 0.09501 | 0.2269 | 75 |
| 129 | theobromine             | 0.074  | 4  | 0.567  | 0.09563 | 0.0276 | 50 |
| 130 | 5707885                 | 0.271  | 4  | 0.565  | 0.09698 | 0.3834 | 50 |
| 131 | nitrofuraf              | 0.273  | 4  | 0.564  | 0.09893 | 0.1111 | 50 |
| 132 | deptropine              | -0.432 | 4  | -0.563 | 0.10145 | 0.2239 | 75 |
| 133 | procarbazine            | -0.289 | 3  | -0.633 | 0.10187 | 0.0161 | 66 |
| 134 | oxolamine               | 0.266  | 4  | 0.56   | 0.1036  | 0.2747 | 50 |
| 135 | Prestwick-675           | 0.255  | 4  | 0.559  | 0.10414 | 0.1949 | 50 |
| 136 | geldanamycin            | -0.243 | 15 | -0.302 | 0.10432 | 0.5    | 53 |
| 137 | salbutamol              | -0.429 | 5  | -0.504 | 0.10498 | 0.0827 | 80 |
| 138 | thiocolchicoside        | -0.395 | 4  | -0.56  | 0.10525 | 0.2012 | 75 |
| 139 | clemastine              | 0.271  | 3  | 0.628  | 0.10682 | 0.228  | 66 |
| 140 | cotinine                | -0.298 | 6  | -0.463 | 0.10756 | 0.2188 | 66 |
| 141 | atropine methonitrate   | -0.293 | 3  | -0.627 | 0.1076  | 0.1038 | 66 |
| 142 | triflusal               | -0.432 | 3  | -0.625 | 0.10953 | 0.3128 | 66 |
| 143 | decamethonium bromid    | 0.263  | 4  | 0.553  | 0.10975 | 0.0559 | 50 |
| 144 | gliquidone              | 0.217  | 4  | 0.553  | 0.11005 | 0.0633 | 50 |
| 145 | iproniazid              | 0.322  | 5  | 0.502  | 0.11038 | 0.3129 | 60 |
| 146 | aciclovir               | 0.263  | 6  | 0.457  | 0.11422 | 0.3789 | 50 |
| 147 | hydrastine hydrochloric | -0.232 | 4  | -0.552 | 0.11486 | 0.1429 | 50 |
| 148 | proadifen               | -0.362 | 4  | -0.546 | 0.12206 | 0.1739 | 75 |
| 149 | dextromethorphan        | -0.431 | 4  | -0.546 | 0.12244 | 0.2335 | 75 |
| 150 | clonidine               | -0.468 | 4  | -0.545 | 0.1229  | 0.1037 | 75 |
| 151 | diloxanide              | 0.244  | 4  | 0.542  | 0.12334 | 0.25   | 50 |
| 152 | docosahexaenoic acid    | 0.225  | 2  | 0.75   | 0.12428 | 0.1443 | 50 |
| 153 | prenylamine             | -0.362 | 4  | -0.541 | 0.12801 | 0.2477 | 75 |
| 154 | ifenprodil              | -0.444 | 4  | -0.541 | 0.12861 | 0.3333 | 75 |
| 155 | amodiaquine             | -0.372 | 4  | -0.538 | 0.13215 | 0.1513 | 75 |
| 156 | ampyrone                | 0.252  | 5  | 0.485  | 0.13253 | 0.2262 | 60 |
| 157 | nortriptyline           | -0.219 | 4  | -0.536 | 0.13392 | 0.1898 | 75 |
| 158 | antazoline              | -0.342 | 4  | -0.535 | 0.13571 | 0.1509 | 75 |
| 159 | alvespimycin            | -0.288 | 12 | -0.32  | 0.1358  | 0.3841 | 50 |
| 160 | hycanthone              | -0.342 | 4  | -0.534 | 0.13603 | 0.1849 | 75 |
| 161 | calcium folinate        | 0.282  | 5  | 0.482  | 0.13816 | 0.4751 | 60 |
| 162 | imipenem                | -0.395 | 4  | -0.532 | 0.13895 | 0.3536 | 75 |
| 163 | aztreonam               | -0.349 | 5  | -0.48  | 0.1397  | 0.0729 | 80 |
| 164 | methylethergometrine    | -0.431 | 4  | -0.53  | 0.14223 | 0.25   | 75 |
| 165 | clomifene               | -0.438 | 4  | -0.529 | 0.14369 | 0.1957 | 75 |
| 166 | triflupromazine         | 0.356  | 4  | 0.525  | 0.1454  | 0.2908 | 50 |
| 167 | fusidic acid            | 0.211  | 4  | 0.525  | 0.14633 | 0.1242 | 50 |
| 168 | verapamil               | -0.216 | 6  | -0.437 | 0.14791 | 0.1188 | 66 |
| 169 | glycopyrronium bromid   | -0.198 | 5  | -0.475 | 0.14807 | 0.1282 | 80 |
| 170 | pivmecillinam           | 0.332  | 4  | 0.523  | 0.14808 | 0.2366 | 50 |
| 171 | proguanil               | -0.318 | 3  | -0.595 | 0.14849 | 0.1333 | 66 |
| 172 | pargyline               | -0.393 | 4  | -0.524 | 0.14936 | 0.3568 | 75 |
| 173 | desoxycortone           | 0.064  | 4  | 0.522  | 0.14967 | 0.0909 | 50 |
| 174 | flumequine              | -0.381 | 4  | -0.523 | 0.15133 | 0.1637 | 75 |
| 175 | Prestwick-967           | 0.265  | 4  | 0.52   | 0.15198 | 0.1077 | 50 |
| 176 | prazosin                | -0.256 | 6  | -0.432 | 0.15631 | 0.121  | 50 |
| 177 | latamoxef               | -0.404 | 3  | -0.588 | 0.15886 | 0.2012 | 66 |
| 178 | enalapril               | 0.159  | 4  | 0.515  | 0.15956 | 0.1049 | 50 |

|     |                         |        |    |        |         |        |     |
|-----|-------------------------|--------|----|--------|---------|--------|-----|
| 179 | norethisterone          | -0.393 | 4  | -0.516 | 0.16089 | 0.2195 | 75  |
| 180 | calycanthine            | 0.283  | 4  | 0.514  | 0.16111 | 0.1302 | 50  |
| 181 | amiloride               | -0.342 | 5  | -0.465 | 0.16391 | 0.2292 | 80  |
| 182 | propafenone             | -0.391 | 4  | -0.514 | 0.16394 | 0.2963 | 75  |
| 183 | bufexamac               | -0.384 | 4  | -0.514 | 0.16408 | 0.3412 | 75  |
| 184 | ceftazidime             | -0.301 | 3  | -0.583 | 0.16649 | 0.0881 | 66  |
| 185 | 0297417-0002B           | -0.413 | 3  | -0.583 | 0.16675 | 0.3361 | 66  |
| 186 | pergolide               | -0.297 | 4  | -0.511 | 0.16814 | 0.1704 | 50  |
| 187 | tinidazole              | -0.247 | 6  | -0.425 | 0.1695  | 0.2114 | 50  |
| 188 | scopolamine N-oxide     | -0.24  | 5  | -0.461 | 0.17206 | 0.3175 | 60  |
| 189 | furazolidone            | 0.279  | 4  | 0.506  | 0.17297 | 0.3871 | 50  |
| 190 | thiostrepton            | -0.371 | 4  | -0.508 | 0.17339 | 0.3426 | 75  |
| 191 | dexamethasone           | 0.007  | 8  | 0.366  | 0.18046 | 0.1771 | 50  |
| 192 | chrysin                 | -0.381 | 3  | -0.573 | 0.18218 | 0.4343 | 66  |
| 193 | piperine                | 0.127  | 4  | 0.5    | 0.18311 | 0.0775 | 50  |
| 194 | pentoxyverine           | -0.352 | 4  | -0.501 | 0.18383 | 0.4873 | 75  |
| 195 | vinpocetine             | -0.308 | 4  | -0.501 | 0.18433 | 0.3122 | 75  |
| 196 | PNU-0293363             | 0.274  | 3  | 0.571  | 0.1873  | 0.1698 | 66  |
| 197 | lysergol                | -0.408 | 4  | -0.498 | 0.18835 | 0.1936 | 75  |
| 198 | Prestwick-685           | -0.319 | 5  | -0.452 | 0.18977 | 0.3579 | 60  |
| 199 | monobenzone             | -0.366 | 4  | -0.495 | 0.1933  | 0.2635 | 75  |
| 200 | fasudil                 | 0.219  | 2  | 0.683  | 0.2007  | 0.0593 | 50  |
| 201 | etynodiol               | 0.267  | 4  | 0.489  | 0.20205 | 0.3416 | 50  |
| 202 | mefexamide              | -0.236 | 4  | -0.49  | 0.20301 | 0.1879 | 50  |
| 203 | emetine                 | -0.257 | 4  | -0.489 | 0.20341 | 0.6412 | 75  |
| 204 | trimethobenzamide       | 0.336  | 5  | 0.446  | 0.20461 | 0.5215 | 60  |
| 205 | 4,5-dianilinophthalimid | -0.419 | 2  | -0.68  | 0.2047  | 0.3386 | 100 |
| 206 | trifluridine            | -0.377 | 4  | -0.488 | 0.20665 | 0.2377 | 75  |
| 207 | clomipramine            | -0.387 | 4  | -0.487 | 0.20742 | 0.3664 | 75  |
| 208 | betamethasone           | 0.21   | 3  | 0.558  | 0.2101  | 0.1243 | 66  |
| 209 | calmidazolium           | -0.466 | 2  | -0.675 | 0.2109  | 0.3197 | 100 |
| 210 | zuclopenthixol          | -0.291 | 4  | -0.484 | 0.21421 | 0.1395 | 50  |
| 211 | arachidonic acid        | -0.319 | 3  | -0.554 | 0.21647 | 0.359  | 66  |
| 212 | seneciphylline          | -0.357 | 4  | -0.482 | 0.21882 | 0.1718 | 50  |
| 213 | pyridoxine              | -0.377 | 4  | -0.481 | 0.22083 | 0.4335 | 75  |
| 214 | rolitetracycline        | -0.272 | 4  | -0.481 | 0.22113 | 0.3911 | 50  |
| 215 | dihydrostreptomycin     | -0.27  | 5  | -0.435 | 0.22565 | 0.1687 | 60  |
| 216 | H-89                    | -0.241 | 3  | -0.549 | 0.22666 | 0.2054 | 66  |
| 217 | canadine                | 0.329  | 4  | 0.475  | 0.22666 | 0.6012 | 50  |
| 218 | cyclopenthiiazide       | -0.237 | 4  | -0.478 | 0.22696 | 0.2108 | 50  |
| 219 | coralyne                | 0.118  | 4  | 0.475  | 0.22829 | 0.2025 | 50  |
| 220 | copper sulfate          | 0.216  | 4  | 0.474  | 0.22972 | 0.2727 | 50  |
| 221 | clenbuterol             | -0.256 | 5  | -0.432 | 0.23104 | 0.1854 | 60  |
| 222 | nordihydroquaiaretic a  | -0.138 | 15 | -0.257 | 0.23452 | 0.2778 | 53  |
| 223 | fluspirilene            | -0.34  | 4  | -0.469 | 0.24675 | 0.4425 | 75  |
| 224 | pseudopelletierine      | -0.367 | 4  | -0.468 | 0.24898 | 0.3892 | 75  |
| 225 | SC-560                  | 0.151  | 3  | 0.538  | 0.24944 | 0.483  | 66  |
| 226 | ribavirin               | 0.33   | 4  | 0.465  | 0.24998 | 0.4563 | 50  |
| 227 | alpha-yohimbine         | 0.189  | 3  | 0.537  | 0.25118 | 0.3353 | 66  |
| 228 | palmatine               | -0.19  | 4  | -0.467 | 0.25169 | 0.2737 | 50  |
| 229 | bucladesine             | 0.189  | 6  | 0.386  | 0.25625 | 0.2687 | 50  |
| 230 | bergenin                | 0.302  | 4  | 0.462  | 0.25644 | 0.2848 | 50  |
| 231 | rotenone                | -0.216 | 4  | -0.464 | 0.25648 | 0.3333 | 50  |
| 232 | thalidomide             | -0.279 | 7  | -0.36  | 0.25902 | 0.4032 | 57  |
| 233 | iloprost                | 0.323  | 3  | 0.533  | 0.25979 | 0.5263 | 66  |
| 234 | butein                  | 0.162  | 2  | 0.639  | 0.25993 | 0.2866 | 50  |
| 235 | terbutaline             | -0.223 | 4  | -0.462 | 0.26098 | 0.1689 | 50  |
| 236 | etomidate               | -0.371 | 3  | -0.531 | 0.26122 | 0.5714 | 66  |
| 237 | citalopram              | 0.212  | 4  | 0.459  | 0.26374 | 0.2798 | 50  |
| 238 | santonin                | -0.18  | 4  | -0.46  | 0.26523 | 0.2434 | 75  |
| 239 | bupivacaine             | -0.226 | 4  | -0.459 | 0.2679  | 0.2407 | 75  |

|     |                         |        |    |        |         |        |    |
|-----|-------------------------|--------|----|--------|---------|--------|----|
| 240 | carteolol               | 0.231  | 4  | 0.457  | 0.26945 | 0.4546 | 50 |
| 241 | 3-acetamidocoumarin     | 0.339  | 4  | 0.456  | 0.27146 | 0.6519 | 50 |
| 242 | SB-202190               | -0.286 | 5  | -0.415 | 0.27157 | 0.2463 | 60 |
| 243 | cinchonidine            | -0.289 | 4  | -0.457 | 0.27353 | 0.2123 | 75 |
| 244 | bethanechol             | -0.241 | 4  | -0.455 | 0.27848 | 0.3237 | 50 |
| 245 | canavanine              | -0.347 | 3  | -0.523 | 0.2792  | 0.3144 | 66 |
| 246 | epiandrosterone         | -0.229 | 4  | -0.453 | 0.28322 | 0.3881 | 75 |
| 247 | fenoprofen              | -0.332 | 6  | -0.377 | 0.2842  | 0.648  | 66 |
| 248 | nefopam                 | -0.185 | 5  | -0.409 | 0.28489 | 0.2828 | 60 |
| 249 | IC-86621                | 0.126  | 4  | 0.449  | 0.28668 | 0.3068 | 50 |
| 250 | ethosuximide            | -0.357 | 4  | -0.451 | 0.28763 | 0.3678 | 75 |
| 251 | picROTOXININ            | -0.246 | 4  | -0.451 | 0.28901 | 0.2707 | 50 |
| 252 | Trolox C                | -0.355 | 4  | -0.45  | 0.28982 | 0.3069 | 75 |
| 253 | BCB000040               | 0.258  | 4  | 0.447  | 0.29179 | 0.3086 | 50 |
| 254 | sulOCTIDIL              | -0.38  | 4  | -0.449 | 0.29273 | 0.3587 | 75 |
| 255 | propylthiouracil        | -0.344 | 4  | -0.448 | 0.29412 | 0.5677 | 75 |
| 256 | levothyroxine sodium    | 0.291  | 4  | 0.446  | 0.29575 | 0.3129 | 50 |
| 257 | chloropyramine          | -0.164 | 4  | -0.448 | 0.29658 | 0.3224 | 75 |
| 258 | metitepine              | -0.228 | 4  | -0.447 | 0.2968  | 0.3391 | 50 |
| 259 | chlorcyclizine          | -0.229 | 6  | -0.372 | 0.29749 | 0.1696 | 66 |
| 260 | omeprazole              | -0.327 | 4  | -0.447 | 0.29762 | 0.6798 | 50 |
| 261 | bambuterol              | 0.157  | 4  | 0.445  | 0.29764 | 0.3642 | 50 |
| 262 | betulinic acid          | 0.336  | 4  | 0.444  | 0.29999 | 0.5095 | 50 |
| 263 | tiaprofenic acid        | -0.185 | 4  | -0.446 | 0.30044 | 0.3476 | 50 |
| 264 | phensuximide            | -0.134 | 4  | -0.444 | 0.30532 | 0.4952 | 75 |
| 265 | letrozole               | 0.151  | 4  | 0.441  | 0.30872 | 0.1964 | 50 |
| 266 | orciprenaline           | -0.273 | 4  | -0.443 | 0.30967 | 0.3286 | 75 |
| 267 | dosulepin               | -0.22  | 4  | -0.442 | 0.31061 | 0.2479 | 50 |
| 268 | talampicillin           | -0.349 | 4  | -0.441 | 0.31359 | 0.4706 | 75 |
| 269 | enilconazole            | -0.146 | 4  | -0.439 | 0.32042 | 0.3292 | 75 |
| 270 | tropine                 | 0.185  | 4  | 0.437  | 0.32058 | 0.3188 | 50 |
| 271 | meptazinol              | -0.227 | 4  | -0.437 | 0.32396 | 0.3568 | 50 |
| 272 | tolfenamic acid         | -0.289 | 4  | -0.437 | 0.32439 | 0.4059 | 75 |
| 273 | sulfapyridine           | -0.2   | 4  | -0.436 | 0.32674 | 0.2832 | 50 |
| 274 | PF-00539758-00          | -0.243 | 3  | -0.5   | 0.33036 | 0.2519 | 66 |
| 275 | phenelzine              | -0.211 | 6  | -0.36  | 0.33511 | 0.2444 | 50 |
| 276 | ethisterone             | 0.143  | 6  | 0.358  | 0.33543 | 0.4774 | 50 |
| 277 | puromycin               | -0.327 | 4  | -0.432 | 0.33707 | 0.597  | 75 |
| 278 | spiramycin              | 0.068  | 6  | 0.357  | 0.33894 | 0.3697 | 50 |
| 279 | yohimbic acid           | -0.29  | 3  | -0.496 | 0.33942 | 0.4824 | 66 |
| 280 | suramin sodium          | 0.133  | 4  | 0.43   | 0.33985 | 0.3562 | 50 |
| 281 | acetylsalicylic acid    | -0.203 | 13 | -0.247 | 0.34315 | 0.5775 | 53 |
| 282 | dehydrocholic acid      | -0.225 | 5  | -0.387 | 0.34557 | 0.3044 | 60 |
| 283 | ursolic acid            | -0.118 | 4  | -0.428 | 0.34779 | 0.4599 | 75 |
| 284 | orlistat                | -0.232 | 5  | -0.386 | 0.34909 | 0.2874 | 60 |
| 285 | indapamide              | 0.021  | 6  | 0.353  | 0.35001 | 0.2647 | 50 |
| 286 | flucloxacillin          | 0.144  | 4  | 0.426  | 0.35039 | 0.3701 | 50 |
| 287 | arachidonyltrifluoromet | 0.329  | 2  | 0.58   | 0.35318 | 0.4843 | 50 |
| 288 | 0173570-0000            | -0.233 | 6  | -0.353 | 0.35501 | 0.5985 | 50 |
| 289 | noretynodrel            | -0.28  | 4  | -0.426 | 0.35658 | 0.363  | 50 |
| 290 | Prestwick-1103          | 0.31   | 4  | 0.424  | 0.35704 | 0.6522 | 50 |
| 291 | albendazole             | -0.323 | 3  | -0.489 | 0.35772 | 0.4571 | 66 |
| 292 | tolmetin                | 0.15   | 4  | 0.423  | 0.35883 | 0.25   | 50 |
| 293 | labetalol               | -0.373 | 4  | -0.425 | 0.35931 | 0.3022 | 75 |
| 294 | riboflavin              | -0.295 | 4  | -0.425 | 0.35931 | 0.6754 | 50 |
| 295 | cefmetazole             | 0.15   | 4  | 0.423  | 0.35955 | 0.2632 | 50 |
| 296 | pregnenolone            | 0.304  | 4  | 0.422  | 0.36096 | 0.4968 | 50 |
| 297 | ketoprofen              | -0.203 | 6  | -0.351 | 0.36286 | 0.3462 | 50 |
| 298 | metergoline             | -0.365 | 4  | -0.423 | 0.36301 | 0.3304 | 75 |
| 299 | nialamide               | -0.297 | 4  | -0.422 | 0.36697 | 0.4577 | 75 |
| 300 | gelsemine               | 0.12   | 4  | 0.42   | 0.36707 | 0.2908 | 50 |

|     |                        |        |   |        |         |        |    |
|-----|------------------------|--------|---|--------|---------|--------|----|
| 301 | pivampicillin          | -0.319 | 4 | -0.421 | 0.36903 | 0.4652 | 75 |
| 302 | dioxybenzone           | -0.334 | 4 | -0.421 | 0.37043 | 0.4731 | 75 |
| 303 | mifepristone           | 0.167  | 4 | 0.418  | 0.37252 | 0.3052 | 50 |
| 304 | torasemide             | -0.377 | 4 | -0.419 | 0.37449 | 0.4406 | 75 |
| 305 | molindone              | 0.137  | 4 | 0.417  | 0.37522 | 0.325  | 50 |
| 306 | benzylamine            | -0.261 | 4 | -0.418 | 0.37713 | 0.3789 | 75 |
| 307 | AR-A014418             | -0.257 | 3 | -0.481 | 0.37838 | 0.3846 | 66 |
| 308 | nimesulide             | -0.281 | 4 | -0.416 | 0.38332 | 0.4    | 75 |
| 309 | sulfacetamide          | -0.314 | 4 | -0.415 | 0.38634 | 0.4308 | 75 |
| 310 | nizatidine             | 0.28   | 4 | 0.413  | 0.38728 | 0.3926 | 50 |
| 311 | ionomycin              | -0.371 | 3 | -0.475 | 0.39264 | 0.4508 | 66 |
| 312 | Prestwick-642          | 0.304  | 4 | 0.41   | 0.39565 | 0.6886 | 50 |
| 313 | Prestwick-1084         | -0.296 | 4 | -0.412 | 0.39641 | 0.7954 | 50 |
| 314 | butoconazole           | -0.15  | 4 | -0.411 | 0.39909 | 0.4351 | 50 |
| 315 | pepstatin              | 0.151  | 4 | 0.409  | 0.39993 | 0.4167 | 50 |
| 316 | clorsulon              | 0.288  | 4 | 0.408  | 0.40128 | 0.6725 | 50 |
| 317 | guanfacine             | -0.287 | 5 | -0.369 | 0.40284 | 0.5746 | 60 |
| 318 | piroxicam              | -0.308 | 4 | -0.408 | 0.40689 | 0.4971 | 75 |
| 319 | corticosterone         | 0.222  | 4 | 0.405  | 0.41137 | 0.5567 | 50 |
| 320 | fenoterol              | -0.391 | 3 | -0.467 | 0.41419 | 0.4641 | 66 |
| 321 | propoxycaïne           | 0.1    | 4 | 0.402  | 0.42368 | 0.3684 | 50 |
| 322 | irinotecan             | -0.327 | 3 | -0.463 | 0.42398 | 0.6739 | 66 |
| 323 | adenosine phosphate    | -0.178 | 4 | -0.403 | 0.42547 | 0.3907 | 50 |
| 324 | gemfibrozil            | -0.215 | 5 | -0.362 | 0.42583 | 0.5316 | 60 |
| 325 | propranolol            | 0.028  | 4 | 0.401  | 0.42732 | 0.3712 | 50 |
| 326 | benperidol             | -0.215 | 4 | -0.401 | 0.43094 | 0.3988 | 75 |
| 327 | niridazole             | 0.041  | 4 | 0.398  | 0.43576 | 0.3876 | 50 |
| 328 | hexamethonium bromide  | -0.216 | 5 | -0.359 | 0.43757 | 0.6129 | 60 |
| 329 | metrizamide            | 0.149  | 4 | 0.397  | 0.43828 | 0.6164 | 50 |
| 330 | epitioctanol           | 0.057  | 4 | 0.397  | 0.43934 | 0.5067 | 50 |
| 331 | pirindole              | -0.311 | 3 | -0.456 | 0.44399 | 0.4422 | 66 |
| 332 | carbarsone             | 0.118  | 4 | 0.396  | 0.44407 | 0.3675 | 50 |
| 333 | sisomicin              | -0.219 | 4 | -0.397 | 0.44513 | 0.3961 | 50 |
| 334 | halcinonide            | -0.208 | 5 | -0.357 | 0.44516 | 0.481  | 60 |
| 335 | protriptyline          | -0.305 | 4 | -0.396 | 0.44779 | 0.5338 | 50 |
| 336 | strophanthidin         | -0.089 | 4 | -0.396 | 0.44815 | 0.3933 | 50 |
| 337 | Prestwick-920          | -0.227 | 4 | -0.395 | 0.4493  | 0.4124 | 50 |
| 338 | aconitine              | 0.164  | 4 | 0.394  | 0.44936 | 0.3987 | 50 |
| 339 | procyclidine           | -0.06  | 4 | -0.395 | 0.45042 | 0.431  | 50 |
| 340 | xylazine               | -0.307 | 4 | -0.395 | 0.45147 | 0.5    | 50 |
| 341 | naringin               | -0.32  | 4 | -0.394 | 0.45304 | 0.5388 | 50 |
| 342 | cyclopentolate         | -0.141 | 4 | -0.394 | 0.4535  | 0.4563 | 50 |
| 343 | 0316684-0000           | 0.027  | 4 | 0.392  | 0.45499 | 0.3718 | 50 |
| 344 | bicuculline            | -0.275 | 4 | -0.393 | 0.45865 | 0.4859 | 50 |
| 345 | selegiline             | -0.301 | 4 | -0.392 | 0.45921 | 0.4268 | 50 |
| 346 | fluvoxamine            | -0.252 | 4 | -0.392 | 0.4613  | 0.5146 | 50 |
| 347 | phenindione            | -0.188 | 4 | -0.392 | 0.4613  | 0.573  | 50 |
| 348 | etilefrine             | 0.048  | 4 | 0.39   | 0.46233 | 0.5673 | 50 |
| 349 | saquinavir             | -0.285 | 4 | -0.391 | 0.46297 | 0.4943 | 50 |
| 350 | methyl dopate          | 0.075  | 4 | 0.389  | 0.46414 | 0.6629 | 50 |
| 351 | androsterone           | -0.246 | 4 | -0.39  | 0.46581 | 0.3205 | 50 |
| 352 | 16-phenyltetranorprost | 0.007  | 4 | 0.388  | 0.46679 | 0.4653 | 50 |
| 353 | hyoscyamine            | -0.289 | 5 | -0.349 | 0.47316 | 0.5591 | 60 |
| 354 | cicloheximide          | -0.229 | 4 | -0.388 | 0.47339 | 0.6815 | 50 |
| 355 | chloropyrazine         | 0.289  | 4 | 0.386  | 0.47385 | 0.7152 | 50 |
| 356 | CP-645525-01           | -0.296 | 3 | -0.443 | 0.47674 | 0.6194 | 66 |
| 357 | oxprenolol             | -0.198 | 4 | -0.387 | 0.47681 | 0.6634 | 50 |
| 358 | glimepiride            | -0.188 | 4 | -0.387 | 0.47749 | 0.3771 | 50 |
| 359 | ofloxacin              | -0.022 | 5 | -0.348 | 0.47982 | 0.5665 | 60 |
| 360 | hesperetin             | -0.345 | 5 | -0.347 | 0.48141 | 0.5556 | 60 |
| 361 | betahistine            | -0.294 | 4 | -0.385 | 0.48223 | 0.64   | 50 |

|     |                       |        |   |        |         |        |    |
|-----|-----------------------|--------|---|--------|---------|--------|----|
| 362 | flupentixol           | -0.265 | 4 | -0.385 | 0.48386 | 0.576  | 50 |
| 363 | carcinine             | -0.162 | 4 | -0.385 | 0.48439 | 0.4385 | 50 |
| 364 | alverine              | -0.245 | 4 | -0.384 | 0.48593 | 0.457  | 50 |
| 365 | aminophenazone        | -0.275 | 5 | -0.346 | 0.48603 | 0.4706 | 60 |
| 366 | dipivefrine           | -0.271 | 4 | -0.384 | 0.48718 | 0.5197 | 50 |
| 367 | iocetamic acid        | 0.103  | 4 | 0.381  | 0.49    | 0.5852 | 50 |
| 368 | cefaclor              | 0.107  | 4 | 0.378  | 0.50023 | 0.5833 | 50 |
| 369 | ronidazole            | -0.347 | 3 | -0.434 | 0.50052 | 0.782  | 66 |
| 370 | spiradoline           | -0.12  | 4 | -0.379 | 0.50104 | 0.4651 | 50 |
| 371 | pempidine             | -0.281 | 5 | -0.342 | 0.50159 | 0.5679 | 60 |
| 372 | levodopa              | -0.163 | 5 | -0.341 | 0.50305 | 0.6061 | 60 |
| 373 | dobutamine            | -0.25  | 4 | -0.378 | 0.50522 | 0.529  | 50 |
| 374 | quinostatin           | -0.422 | 2 | -0.498 | 0.50555 | 0.7786 | 50 |
| 375 | mephentermine         | -0.25  | 5 | -0.34  | 0.50776 | 0.3556 | 60 |
| 376 | dirithromycin         | -0.201 | 3 | -0.431 | 0.50847 | 0.4693 | 66 |
| 377 | ozagrel               | -0.214 | 4 | -0.377 | 0.51069 | 0.4913 | 50 |
| 378 | STOCK1N-28457         | -0.284 | 3 | -0.43  | 0.51306 | 0.7005 | 66 |
| 379 | ipratropium bromide   | -0.369 | 3 | -0.429 | 0.51661 | 0.7612 | 66 |
| 380 | tetryzoline           | -0.247 | 3 | -0.425 | 0.52634 | 0.3137 | 66 |
| 381 | 5253409               | 0.064  | 2 | 0.493  | 0.5264  | 0.518  | 50 |
| 382 | cromoglicic acid      | -0.179 | 2 | -0.493 | 0.52664 | 0.5193 | 50 |
| 383 | ketoconazole          | 0.048  | 4 | 0.37   | 0.53029 | 0.4967 | 50 |
| 384 | amoxapine             | -0.2   | 5 | -0.334 | 0.53129 | 0.5641 | 60 |
| 385 | SC-58125              | -0.166 | 4 | -0.371 | 0.53146 | 0.5684 | 50 |
| 386 | 15(S)-15-methylprosta | 0.168  | 4 | 0.368  | 0.53427 | 0.6667 | 50 |
| 387 | cefotaxime            | -0.107 | 5 | -0.332 | 0.53694 | 0.5879 | 60 |
| 388 | BCB000038             | 0.102  | 4 | 0.366  | 0.54342 | 0.4146 | 50 |
| 389 | piribedil             | -0.349 | 4 | -0.365 | 0.55205 | 0.61   | 50 |
| 390 | eticlopride           | 0.249  | 4 | 0.363  | 0.55434 | 0.8056 | 50 |
| 391 | gabexate              | 0.258  | 4 | 0.363  | 0.55434 | 0.7025 | 50 |
| 392 | monocrotaline         | -0.134 | 4 | -0.364 | 0.55527 | 0.5134 | 50 |
| 393 | probucol              | -0.178 | 6 | -0.3   | 0.55606 | 0.4785 | 50 |
| 394 | SR-95531              | 0.137  | 4 | 0.36   | 0.56299 | 0.4698 | 50 |
| 395 | quinpirole            | 0.125  | 4 | 0.36   | 0.56444 | 0.7514 | 50 |
| 396 | proxymetacaine        | -0.298 | 4 | -0.361 | 0.56566 | 0.5562 | 50 |
| 397 | spironolactone        | -0.271 | 5 | -0.324 | 0.56766 | 0.6405 | 60 |
| 398 | LM-1685               | -0.14  | 3 | -0.408 | 0.57329 | 0.5159 | 66 |
| 399 | PHA-00767505E         | 0.069  | 4 | 0.357  | 0.57334 | 0.6129 | 50 |
| 400 | sitosterol            | -0.318 | 4 | -0.358 | 0.57399 | 0.8163 | 50 |
| 401 | clorquiline           | -0.269 | 4 | -0.356 | 0.58086 | 0.568  | 50 |
| 402 | edrophonium chloride  | -0.27  | 5 | -0.32  | 0.58456 | 0.6535 | 60 |
| 403 | ketorolac             | -0.062 | 4 | 0.353  | 0.58752 | 0.6186 | 50 |
| 404 | glafenine             | -0.279 | 4 | -0.354 | 0.58851 | 0.7602 | 50 |
| 405 | nisoxetine            | -0.17  | 4 | -0.352 | 0.59573 | 0.6646 | 50 |
| 406 | raubasine             | -0.098 | 4 | -0.351 | 0.60075 | 0.5321 | 50 |
| 407 | tetramisole           | -0.048 | 4 | 0.349  | 0.60252 | 0.4706 | 50 |
| 408 | fenbendazole          | -0.252 | 4 | -0.348 | 0.6105  | 0.595  | 50 |
| 409 | paracetamol           | -0.26  | 4 | -0.345 | 0.61951 | 0.6573 | 50 |
| 410 | estrone               | -0.043 | 4 | -0.343 | 0.62866 | 0.6264 | 50 |
| 411 | meprylcaine           | -0.172 | 4 | -0.34  | 0.6391  | 0.6084 | 50 |
| 412 | cyclizine             | -0.233 | 4 | -0.338 | 0.64557 | 0.6584 | 50 |
| 413 | sulfinpyrazone        | -0.268 | 4 | -0.338 | 0.64557 | 0.7333 | 50 |
| 414 | fipexide              | -0.273 | 3 | -0.381 | 0.65085 | 0.7624 | 66 |
| 415 | cefalotin             | -0.263 | 4 | -0.335 | 0.65396 | 0.6935 | 50 |
| 416 | metaraminol           | -0.13  | 4 | -0.335 | 0.65551 | 0.6648 | 50 |
| 417 | berberine             | -0.276 | 4 | -0.334 | 0.65673 | 0.7616 | 50 |
| 418 | parbendazole          | -0.265 | 4 | -0.333 | 0.66116 | 0.7569 | 50 |
| 419 | meglumine             | -0.247 | 4 | -0.333 | 0.66208 | 0.6169 | 50 |
| 420 | cefalexin             | -0.268 | 5 | -0.3   | 0.66376 | 0.9101 | 60 |
| 421 | flavoxate             | -0.286 | 4 | -0.332 | 0.66464 | 0.6485 | 50 |
| 422 | pyrvinium             | -0.264 | 6 | -0.275 | 0.6671  | 0.8041 | 50 |

|     |                        |        |   |        |         |        |    |
|-----|------------------------|--------|---|--------|---------|--------|----|
| 423 | guanethidine           | -0.304 | 3 | -0.373 | 0.67286 | 0.7326 | 66 |
| 424 | isotretinoin           | -0.07  | 4 | -0.329 | 0.67395 | 0.7143 | 50 |
| 425 | tobramycin             | -0.237 | 4 | -0.327 | 0.68153 | 0.8371 | 50 |
| 426 | SR-95639A              | -0.199 | 4 | -0.327 | 0.68301 | 0.6395 | 50 |
| 427 | sulfasalazine          | -0.134 | 5 | -0.293 | 0.69056 | 0.694  | 60 |
| 428 | Prestwick-665          | -0.288 | 5 | -0.293 | 0.6912  | 0.8201 | 60 |
| 429 | methapyrilene          | -0.258 | 4 | -0.324 | 0.69182 | 0.6704 | 50 |
| 430 | fluvastatin            | -0.109 | 4 | -0.324 | 0.69323 | 0.6319 | 50 |
| 431 | guinisocaine           | -0.3   | 4 | -0.323 | 0.69639 | 0.648  | 50 |
| 432 | nadide                 | -0.169 | 4 | -0.322 | 0.69902 | 0.7093 | 50 |
| 433 | 5182598                | 0.08   | 2 | 0.444  | 0.69991 | 0.8039 | 50 |
| 434 | famprofazone           | -0.251 | 6 | -0.267 | 0.70009 | 0.8391 | 50 |
| 435 | estropipate            | -0.103 | 4 | -0.321 | 0.70069 | 0.7379 | 50 |
| 436 | 5248896                | -0.308 | 2 | -0.443 | 0.7015  | 0.8618 | 50 |
| 437 | probenecid             | -0.157 | 4 | -0.32  | 0.7067  | 0.6482 | 50 |
| 438 | 5255229                | -0.206 | 2 | -0.441 | 0.70691 | 0.5574 | 50 |
| 439 | lorglumide             | -0.24  | 5 | -0.289 | 0.70702 | 0.9026 | 60 |
| 440 | alfaxalone             | -0.227 | 3 | -0.36  | 0.7088  | 0.7766 | 66 |
| 441 | Prestwick-1080         | -0.237 | 4 | -0.319 | 0.70889 | 0.7989 | 50 |
| 442 | isocorydine            | -0.107 | 4 | -0.315 | 0.72315 | 0.6259 | 50 |
| 443 | ornidazole             | -0.225 | 5 | -0.285 | 0.72432 | 0.8534 | 60 |
| 444 | dydrogesterone         | -0.165 | 4 | -0.314 | 0.72546 | 0.6203 | 50 |
| 445 | lidoflazine            | -0.057 | 3 | -0.353 | 0.72783 | 0.6715 | 66 |
| 446 | midecamycin            | -0.302 | 5 | -0.282 | 0.73524 | 0.7461 | 60 |
| 447 | glibenclamide          | -0.14  | 4 | -0.31  | 0.736   | 0.8794 | 50 |
| 448 | sulpiride              | -0.038 | 5 | -0.281 | 0.73864 | 0.7449 | 60 |
| 449 | mimosine               | 0.054  | 3 | -0.348 | 0.73942 | 0.7852 | 66 |
| 450 | 10-methoxyharmalan     | -0.049 | 4 | -0.308 | 0.74211 | 0.705  | 50 |
| 451 | ticarcillin            | -0.353 | 3 | -0.346 | 0.74758 | 0.7329 | 66 |
| 452 | pentetrazol            | -0.215 | 4 | -0.306 | 0.74975 | 0.7512 | 50 |
| 453 | adrenosterone          | -0.241 | 4 | -0.305 | 0.75241 | 0.8276 | 50 |
| 454 | papaverine             | -0.175 | 4 | -0.304 | 0.7548  | 0.7547 | 50 |
| 455 | idazoxan               | -0.257 | 4 | -0.299 | 0.77177 | 0.8315 | 50 |
| 456 | menadione              | -0.291 | 2 | -0.418 | 0.77552 | 0.8276 | 50 |
| 457 | metanephrine           | -0.107 | 5 | -0.271 | 0.77705 | 0.8026 | 60 |
| 458 | etifenin               | -0.255 | 4 | -0.297 | 0.77883 | 0.7701 | 50 |
| 459 | eucatropine            | -0.23  | 6 | -0.246 | 0.78453 | 0.9427 | 50 |
| 460 | crotamiton             | -0.217 | 4 | -0.293 | 0.79186 | 0.8373 | 50 |
| 461 | piperlongumine         | -0.268 | 2 | -0.408 | 0.80069 | 0.8861 | 50 |
| 462 | meropenem              | -0.186 | 4 | -0.29  | 0.80077 | 0.8624 | 50 |
| 463 | 2,6-dimethylpiperidine | -0.18  | 5 | -0.263 | 0.80445 | 0.827  | 60 |
| 464 | zalcitabine            | -0.081 | 4 | -0.287 | 0.80966 | 0.75   | 50 |
| 465 | ciclopirox             | -0.165 | 4 | -0.286 | 0.81076 | 0.9048 | 50 |
| 466 | spiperone              | -0.282 | 2 | -0.404 | 0.81087 | 0.8158 | 50 |
| 467 | medrysone              | -0.297 | 6 | -0.239 | 0.81419 | 0.9568 | 50 |
| 468 | altretamine            | -0.06  | 4 | -0.285 | 0.81456 | 0.7452 | 50 |
| 469 | clobetasol             | -0.266 | 3 | -0.324 | 0.81562 | 0.8013 | 66 |
| 470 | ricinine               | -0.16  | 4 | -0.284 | 0.81915 | 0.7651 | 50 |
| 471 | progesterone           | -0.259 | 4 | -0.283 | 0.82015 | 0.8054 | 50 |
| 472 | cinoxacin              | -0.249 | 4 | -0.283 | 0.82063 | 0.8966 | 50 |
| 473 | 5230742                | -0.28  | 2 | -0.399 | 0.82168 | 0.8689 | 50 |
| 474 | 1,4-chrysenequinone    | -0.28  | 2 | -0.398 | 0.82343 | 0.8516 | 50 |
| 475 | scoulerine             | -0.138 | 4 | -0.281 | 0.82568 | 0.8908 | 50 |
| 476 | niflumic acid          | -0.218 | 4 | -0.28  | 0.82781 | 0.8068 | 50 |
| 477 | flufenamic acid        | -0.235 | 6 | -0.234 | 0.8305  | 0.9143 | 50 |
| 478 | practolol              | -0.096 | 4 | -0.277 | 0.83724 | 0.8469 | 50 |
| 479 | remoxipride            | -0.234 | 4 | -0.277 | 0.83773 | 0.9441 | 50 |
| 480 | 0198306-0000           | -0.231 | 4 | -0.275 | 0.84271 | 0.8921 | 50 |
| 481 | NU-1025                | 0.15   | 2 | 0.39   | 0.84274 | 0.7698 | 50 |
| 482 | Y-27632                | -0.239 | 2 | -0.388 | 0.84727 | 0.9618 | 50 |
| 483 | chlorphenesin          | -0.232 | 4 | -0.273 | 0.84861 | 0.8981 | 50 |

|     |                           |        |   |        |         |        |     |
|-----|---------------------------|--------|---|--------|---------|--------|-----|
| 484 | benfluorex                | -0.248 | 4 | -0.273 | 0.84945 | 0.7929 | 50  |
| 485 | chloramphenicol           | -0.215 | 4 | -0.271 | 0.8557  | 0.9048 | 50  |
| 486 | hecogenin                 | -0.082 | 4 | -0.27  | 0.8579  | 0.8674 | 50  |
| 487 | syrosingopine             | -0.235 | 4 | -0.266 | 0.86771 | 0.8866 | 50  |
| 488 | phenazopyridine           | -0.283 | 4 | -0.265 | 0.86972 | 0.9114 | 50  |
| 489 | roxithromycin             | -0.221 | 4 | -0.261 | 0.88086 | 0.9833 | 50  |
| 490 | telenzepine               | -0.1   | 4 | -0.26  | 0.88408 | 0.8506 | 50  |
| 491 | acetylsalicylsalicylic ac | -0.081 | 4 | -0.258 | 0.88945 | 0.9101 | 50  |
| 492 | clofibrate                | 0.017  | 2 | 0.368  | 0.89008 | 0.9152 | 50  |
| 493 | lobelanidine              | -0.227 | 4 | -0.257 | 0.89061 | 0.9141 | 50  |
| 494 | amantadine                | -0.032 | 4 | -0.254 | 0.89972 | 0.9085 | 50  |
| 495 | (-)-atenolol              | -0.205 | 4 | -0.252 | 0.90272 | 0.8977 | 50  |
| 496 | napelline                 | -0.193 | 4 | -0.247 | 0.91738 | 0.9379 | 50  |
| 497 | TTNPB                     | 0.008  | 2 | 0.346  | 0.92737 | 0.9317 | 50  |
| 498 | tomatidine                | -0.144 | 4 | -0.242 | 0.9285  | 0.9337 | 50  |
| 499 | ampicillin                | -0.052 | 4 | -0.239 | 0.93531 | 0.9434 | 50  |
| 500 | bupropion                 | -0.226 | 4 | -0.234 | 0.94726 | 0.9706 | 50  |
| 501 | delsoline                 | -0.24  | 4 | -0.229 | 0.95528 | 0.9661 | 50  |
| 502 | repaglinide               | -0.229 | 4 | -0.227 | 0.95854 | 0.9902 | 50  |
| 503 | scopolamine               | -0.223 | 4 | -0.224 | 0.96348 | 0.9456 | 50  |
| 504 | proxiphylline             | -0.132 | 4 | -0.214 | 0.97675 | 0.9753 | 50  |
| 505 | Prestwick-1100            | -0.2   | 4 | -0.211 | 0.97955 | 0.9752 | 50  |
| 506 | doxazosin                 | -0.209 | 4 | -0.206 | 0.98355 | 0.9949 | 50  |
| 507 | roxarsone                 | -0.222 | 4 | -0.196 | 0.99079 | 1      | 50  |
| 508 | tiratricol                | -0.117 | 4 | -0.183 | 0.99556 | 1      | 50  |
| 509 | suxibuzone                | -0.075 | 4 | -0.177 | 0.9971  | 1      | 50  |
| 510 | DL-PPMP                   | 0.936  | 1 | 0.999  | ---     | ---    | 100 |
| 511 | tyrphostin AG-1478        | 0.783  | 1 | 0.992  | ---     | ---    | 100 |
| 512 | BW-B70C                   | 0.732  | 1 | 0.985  | ---     | ---    | 100 |
| 513 | 12,13-EODE                | 0.705  | 1 | 0.98   | ---     | ---    | 100 |
| 514 | 5186324                   | 0.652  | 1 | 0.97   | ---     | ---    | 100 |
| 515 | 5186223                   | 0.629  | 1 | 0.96   | ---     | ---    | 100 |
| 516 | 5114445                   | -0.641 | 1 | -0.959 | ---     | ---    | 100 |
| 517 | 5149715                   | 0.62   | 1 | 0.958  | ---     | ---    | 100 |
| 518 | demecolcine               | -0.608 | 1 | -0.938 | ---     | ---    | 100 |
| 519 | gefitinib                 | -0.584 | 1 | -0.919 | ---     | ---    | 100 |
| 520 | sulindac sulfide          | 0.517  | 1 | 0.913  | ---     | ---    | 100 |
| 521 | tomelukast                | 0.387  | 1 | 0.858  | ---     | ---    | 100 |
| 522 | N-phenylantranilic ac     | 0.383  | 1 | 0.856  | ---     | ---    | 100 |
| 523 | PHA-00665752              | -0.511 | 1 | -0.852 | ---     | ---    | 100 |
| 524 | 2-deoxy-D-glucose         | 0.361  | 1 | 0.85   | ---     | ---    | 100 |
| 525 | 5666823                   | 0      | 1 | 0.835  | ---     | ---    | 0   |
| 526 | fisetin                   | 0      | 1 | 0.833  | ---     | ---    | 0   |
| 527 | tyrphostin AG-825         | 0      | 1 | 0.832  | ---     | ---    | 0   |
| 528 | pararosaniline            | -0.485 | 1 | -0.825 | ---     | ---    | 100 |
| 529 | reserpine                 | 0.091  | 3 | 0.82   | ---     | ---    | 33  |
| 530 | doxorubicin               | 0      | 3 | 0.82   | ---     | ---    | 0   |
| 531 | dopamine                  | 0      | 1 | 0.818  | ---     | ---    | 0   |
| 532 | H-7                       | 0      | 4 | 0.816  | ---     | ---    | 0   |
| 533 | tioguanine                | -0.478 | 1 | -0.816 | ---     | ---    | 100 |
| 534 | 5224221                   | 0      | 2 | 0.814  | ---     | ---    | 0   |
| 535 | sanguinarine              | 0      | 2 | 0.812  | ---     | ---    | 0   |
| 536 | cantharidin               | 0      | 1 | 0.805  | ---     | ---    | 0   |
| 537 | azacitidine               | 0      | 3 | 0.802  | ---     | ---    | 0   |
| 538 | mitoxantrone              | 0      | 3 | 0.792  | ---     | ---    | 0   |
| 539 | GW-8510                   | 0      | 4 | 0.79   | ---     | ---    | 0   |
| 540 | HC toxin                  | -0.457 | 1 | -0.79  | ---     | ---    | 100 |
| 541 | exemestane                | 0      | 1 | 0.788  | ---     | ---    | 0   |
| 542 | verteporfin               | 0      | 3 | 0.787  | ---     | ---    | 0   |
| 543 | trichlormethiazide        | 0.087  | 4 | 0.781  | ---     | ---    | 25  |
| 544 | 5286656                   | -0.439 | 1 | -0.775 | ---     | ---    | 100 |

|     |                       |        |   |        |     |     |     |
|-----|-----------------------|--------|---|--------|-----|-----|-----|
| 545 | camptothecin          | 0      | 3 | 0.771  | --- | --- | 0   |
| 546 | alsterpauellone       | 0      | 3 | 0.768  | --- | --- | 0   |
| 547 | piromidic acid        | 0.123  | 4 | 0.76   | --- | --- | 25  |
| 548 | cytochalasin B        | 0      | 1 | 0.753  | --- | --- | 0   |
| 549 | dienestrol            | 0.209  | 3 | 0.749  | --- | --- | 33  |
| 550 | BAS-012416453         | 0.141  | 3 | 0.744  | --- | --- | 33  |
| 551 | 5109870               | 0      | 1 | 0.742  | --- | --- | 0   |
| 552 | MS-275                | 0      | 2 | 0.732  | --- | --- | 0   |
| 553 | aminoglutethimide     | 0.174  | 3 | 0.726  | --- | --- | 33  |
| 554 | etamsylate            | 0      | 4 | 0.71   | --- | --- | 0   |
| 555 | NS-398                | 0.187  | 3 | 0.707  | --- | --- | 33  |
| 556 | ebselen               | 0      | 3 | 0.699  | --- | --- | 0   |
| 557 | 5252917               | 0      | 2 | 0.696  | --- | --- | 0   |
| 558 | moxonidine            | 0      | 3 | 0.69   | --- | --- | 0   |
| 559 | risperidone           | 0.223  | 3 | 0.688  | --- | --- | 33  |
| 560 | dexverapamil          | 0      | 1 | 0.682  | --- | --- | 0   |
| 561 | R-atenolol            | 0.158  | 4 | 0.678  | --- | --- | 25  |
| 562 | chlorambucil          | 0      | 4 | 0.669  | --- | --- | 0   |
| 563 | hexestrol             | 0      | 4 | 0.664  | --- | --- | 0   |
| 564 | 5162773               | 0      | 1 | 0.661  | --- | --- | 0   |
| 565 | 5213008               | 0      | 1 | 0.661  | --- | --- | 0   |
| 566 | isopropamide iodide   | 0.144  | 4 | 0.659  | --- | --- | 25  |
| 567 | fosfosal              | 0.112  | 4 | 0.657  | --- | --- | 25  |
| 568 | rottlerin             | 0      | 3 | 0.655  | --- | --- | 0   |
| 569 | dimethyloxalylglycine | -0.264 | 1 | -0.655 | --- | --- | 100 |
| 570 | HNMPA-(AM)3           | -0.254 | 1 | -0.654 | --- | --- | 100 |
| 571 | 3-aminobenzamide      | 0      | 1 | 0.652  | --- | --- | 0   |
| 572 | U0125                 | -0.228 | 1 | -0.651 | --- | --- | 100 |
| 573 | acepromazine          | 0      | 4 | 0.65   | --- | --- | 0   |
| 574 | depudecin             | 0      | 2 | 0.65   | --- | --- | 0   |
| 575 | dimethadione          | 0.137  | 4 | 0.646  | --- | --- | 25  |
| 576 | 5152487               | 0      | 1 | 0.64   | --- | --- | 0   |
| 577 | hydrocotamine         | 0.107  | 4 | 0.638  | --- | --- | 25  |
| 578 | oligomycin            | 0      | 1 | 0.637  | --- | --- | 0   |
| 579 | nifuroxazide          | 0.084  | 4 | 0.63   | --- | --- | 25  |
| 580 | doxepin               | 0.179  | 3 | 0.628  | --- | --- | 33  |
| 581 | ticlopidine           | 0.105  | 5 | 0.625  | --- | --- | 20  |
| 582 | pimethixene           | 0.187  | 3 | 0.621  | --- | --- | 33  |
| 583 | STOCK1N-35215         | 0      | 3 | 0.617  | --- | --- | 0   |
| 584 | beclometasone         | 0.191  | 3 | 0.613  | --- | --- | 33  |
| 585 | meticrane             | 0      | 5 | 0.61   | --- | --- | 0   |
| 586 | aminocaproic acid     | 0.214  | 3 | 0.608  | --- | --- | 33  |
| 587 | 5140203               | 0      | 1 | 0.604  | --- | --- | 0   |
| 588 | cefuroxime            | 0.131  | 4 | 0.603  | --- | --- | 25  |
| 589 | etidronic acid        | 0.159  | 4 | 0.6    | --- | --- | 25  |
| 590 | oxamic acid           | 0      | 1 | 0.599  | --- | --- | 0   |
| 591 | 7-aminocephalosporar  | 0.097  | 4 | 0.592  | --- | --- | 25  |
| 592 | lisinopril            | 0      | 3 | 0.582  | --- | --- | 0   |
| 593 | mercaptapurine        | 0      | 2 | 0.58   | --- | --- | 0   |
| 594 | decitabine            | 0      | 1 | -0.58  | --- | --- | 0   |
| 595 | thioguanosine         | 0      | 4 | 0.578  | --- | --- | 0   |
| 596 | alcuronium chloride   | 0      | 2 | 0.577  | --- | --- | 0   |
| 597 | minocycline           | 0.235  | 5 | 0.571  | --- | --- | 40  |
| 598 | STOCK1N-35696         | 0      | 2 | -0.57  | --- | --- | 0   |
| 599 | (-)-catechin          | 0      | 1 | 0.57   | --- | --- | 0   |
| 600 | sulfaguanidine        | 0.131  | 5 | 0.569  | --- | --- | 20  |
| 601 | celastrol             | 0      | 1 | 0.569  | --- | --- | 0   |
| 602 | cefoxitin             | 0.131  | 4 | 0.568  | --- | --- | 25  |
| 603 | mebhydrolin           | -0.112 | 4 | -0.565 | --- | --- | 25  |
| 604 | azaperone             | 0.14   | 4 | 0.564  | --- | --- | 25  |
| 605 | metacycline           | 0      | 4 | 0.563  | --- | --- | 0   |

|     |                       |        |   |        |     |     |    |
|-----|-----------------------|--------|---|--------|-----|-----|----|
| 606 | flutamide             | 0.11   | 5 | 0.562  | --- | --- | 20 |
| 607 | diclofenamide         | 0.069  | 4 | 0.56   | --- | --- | 25 |
| 608 | SB-203580             | 0.228  | 5 | 0.558  | --- | --- | 40 |
| 609 | harmalol              | -0.126 | 3 | -0.557 | --- | --- | 33 |
| 610 | lymecycline           | 0      | 4 | 0.557  | --- | --- | 0  |
| 611 | hydralazine           | 0.145  | 6 | 0.556  | --- | --- | 16 |
| 612 | flumetasone           | 0.017  | 6 | 0.554  | --- | --- | 16 |
| 613 | fludroxycortide       | 0      | 5 | 0.552  | --- | --- | 0  |
| 614 | fenbufen              | 0.218  | 6 | 0.552  | --- | --- | 33 |
| 615 | benzonatate           | 0.011  | 5 | 0.55   | --- | --- | 20 |
| 616 | nalidixic acid        | 0.16   | 5 | 0.549  | --- | --- | 40 |
| 617 | etanidazole           | 0      | 4 | 0.548  | --- | --- | 0  |
| 618 | topiramate            | 0      | 1 | -0.548 | --- | --- | 0  |
| 619 | moxisylyte            | 0.148  | 5 | 0.547  | --- | --- | 20 |
| 620 | iohexol               | -0.151 | 4 | -0.546 | --- | --- | 25 |
| 621 | sulfaphenazole        | 0.114  | 4 | 0.544  | --- | --- | 25 |
| 622 | oxantel               | 0.047  | 4 | 0.544  | --- | --- | 25 |
| 623 | 1,5-isoguinolinediol  | 0      | 1 | -0.543 | --- | --- | 0  |
| 624 | Prestwick-972         | 0      | 3 | -0.54  | --- | --- | 0  |
| 625 | lumicolchicine        | -0.18  | 3 | -0.54  | --- | --- | 33 |
| 626 | propantheline bromide | 0      | 4 | 0.539  | --- | --- | 0  |
| 627 | 2-aminobenzenesulfon  | -0.073 | 4 | -0.539 | --- | --- | 25 |
| 628 | viomycin              | 0      | 4 | -0.539 | --- | --- | 0  |
| 629 | midodrine             | -0.09  | 5 | -0.537 | --- | --- | 20 |
| 630 | phenyl biguanide      | 0      | 1 | -0.537 | --- | --- | 0  |
| 631 | norfloxacin           | -0.075 | 5 | 0.537  | --- | --- | 0  |
| 632 | ethaverine            | -0.174 | 4 | 0.537  | --- | --- | 0  |
| 633 | cyanocobalamin        | 0      | 4 | 0.537  | --- | --- | 0  |
| 634 | PF-00875133-00        | 0.184  | 3 | 0.536  | --- | --- | 33 |
| 635 | skimianine            | -0.133 | 4 | 0.535  | --- | --- | 0  |
| 636 | acetazolamide         | 0      | 4 | 0.533  | --- | --- | 0  |
| 637 | cinnarizine           | 0.118  | 4 | 0.533  | --- | --- | 25 |
| 638 | esculetin             | -0.161 | 3 | -0.532 | --- | --- | 33 |
| 639 | etoposide             | -0.159 | 4 | -0.528 | --- | --- | 25 |
| 640 | halofantrine          | 0      | 3 | -0.527 | --- | --- | 0  |
| 641 | maprotiline           | -0.1   | 4 | -0.526 | --- | --- | 25 |
| 642 | methoxsalen           | 0      | 3 | 0.526  | --- | --- | 0  |
| 643 | C-75                  | 0      | 4 | 0.525  | --- | --- | 25 |
| 644 | butirosin             | 0      | 4 | 0.525  | --- | --- | 0  |
| 645 | tiletamine            | 0      | 4 | -0.525 | --- | --- | 0  |
| 646 | splitomicin           | 0      | 1 | 0.523  | --- | --- | 0  |
| 647 | thioperamide          | 0      | 5 | -0.521 | --- | --- | 0  |
| 648 | chlorphenamine        | 0      | 4 | 0.521  | --- | --- | 0  |
| 649 | propofol              | -0.042 | 4 | 0.519  | --- | --- | 25 |
| 650 | benserazide           | -0.184 | 5 | -0.519 | --- | --- | 40 |
| 651 | tacrolimus            | 0.128  | 3 | 0.516  | --- | --- | 33 |
| 652 | lansoprazole          | 0.21   | 4 | 0.515  | --- | --- | 25 |
| 653 | MG-132                | 0      | 1 | -0.515 | --- | --- | 0  |
| 654 | ethionamide           | 0.187  | 3 | 0.515  | --- | --- | 33 |
| 655 | phenanthridinone      | 0      | 1 | -0.514 | --- | --- | 0  |
| 656 | pipemidic acid        | 0      | 3 | 0.512  | --- | --- | 0  |
| 657 | dihydroergocristine   | -0.131 | 4 | -0.512 | --- | --- | 25 |
| 658 | AG-012559             | -0.132 | 3 | -0.511 | --- | --- | 33 |
| 659 | biperiden             | 0      | 5 | -0.511 | --- | --- | 0  |
| 660 | moroxydine            | 0      | 5 | 0.509  | --- | --- | 0  |
| 661 | pizotifen             | -0.107 | 4 | -0.509 | --- | --- | 25 |
| 662 | STOCK1N-35874         | 0      | 2 | -0.508 | --- | --- | 0  |
| 663 | isoflupredone         | 0      | 3 | -0.508 | --- | --- | 0  |
| 664 | carmustine            | 0      | 3 | 0.507  | --- | --- | 0  |
| 665 | pyrithyldione         | -0.114 | 4 | -0.506 | --- | --- | 25 |
| 666 | dorzolamide           | 0      | 4 | 0.501  | --- | --- | 0  |

|     |                       |        |   |        |     |     |    |
|-----|-----------------------|--------|---|--------|-----|-----|----|
| 667 | 5151277               | 0      | 1 | 0.501  | --- | --- | 0  |
| 668 | azapropazone          | -0.116 | 3 | -0.5   | --- | --- | 33 |
| 669 | prilocaine            | 0.108  | 6 | 0.499  | --- | --- | 33 |
| 670 | bisoprolol            | 0.143  | 4 | 0.498  | --- | --- | 25 |
| 671 | trimethadione         | 0.146  | 4 | 0.498  | --- | --- | 25 |
| 672 | netilmicin            | 0.192  | 4 | 0.497  | --- | --- | 25 |
| 673 | sulfabenzamide        | 0.19   | 4 | 0.497  | --- | --- | 25 |
| 674 | trihexyphenidyl       | 0      | 3 | -0.497 | --- | --- | 0  |
| 675 | esculin               | 0.138  | 4 | 0.496  | --- | --- | 25 |
| 676 | exisulind             | 0      | 2 | -0.496 | --- | --- | 0  |
| 677 | Prestwick-1082        | 0.238  | 3 | 0.495  | --- | --- | 33 |
| 678 | gentamicin            | 0.154  | 4 | 0.495  | --- | --- | 25 |
| 679 | vigabatrin            | -0.115 | 3 | -0.495 | --- | --- | 33 |
| 680 | moracizine            | 0      | 4 | 0.495  | --- | --- | 0  |
| 681 | fenofibrate           | 0.05   | 3 | 0.494  | --- | --- | 33 |
| 682 | mepyramine            | 0      | 4 | 0.491  | --- | --- | 0  |
| 683 | cefepime              | -0.145 | 4 | -0.49  | --- | --- | 25 |
| 684 | guanabenz             | -0.08  | 5 | -0.489 | --- | --- | 20 |
| 685 | penbutolol            | -0.168 | 3 | -0.488 | --- | --- | 33 |
| 686 | bezafibrate           | 0      | 4 | 0.488  | --- | --- | 0  |
| 687 | mestranol             | 0.022  | 4 | 0.487  | --- | --- | 25 |
| 688 | mephenytoin           | 0.091  | 4 | 0.486  | --- | --- | 25 |
| 689 | Prestwick-682         | 0.167  | 4 | 0.486  | --- | --- | 25 |
| 690 | sertaconazole         | 0      | 4 | 0.486  | --- | --- | 0  |
| 691 | benzocaine            | -0.073 | 4 | -0.485 | --- | --- | 25 |
| 692 | liothyronine          | -0.112 | 4 | 0.485  | --- | --- | 0  |
| 693 | oxybuprocaine         | 0      | 4 | 0.485  | --- | --- | 0  |
| 694 | stachydrine           | 0      | 4 | 0.484  | --- | --- | 0  |
| 695 | pyrimethamine         | 0.096  | 5 | 0.484  | --- | --- | 20 |
| 696 | chlorprothixene       | -0.021 | 4 | 0.483  | --- | --- | 25 |
| 697 | pirenerone            | -0.138 | 5 | -0.482 | --- | --- | 40 |
| 698 | chenodeoxycholic acid | 0.164  | 4 | 0.48   | --- | --- | 25 |
| 699 | articaïne             | 0.153  | 3 | 0.48   | --- | --- | 33 |
| 700 | sparteine             | 0.113  | 4 | 0.479  | --- | --- | 25 |
| 701 | ifosfamide            | -0.197 | 3 | -0.478 | --- | --- | 33 |
| 702 | capsaicin             | 0.086  | 4 | 0.478  | --- | --- | 25 |
| 703 | rescinnamine          | 0      | 3 | 0.478  | --- | --- | 0  |
| 704 | dicloxacillin         | 0      | 4 | 0.476  | --- | --- | 0  |
| 705 | lisuride              | 0.197  | 5 | 0.476  | --- | --- | 40 |
| 706 | phenazone             | -0.155 | 3 | -0.475 | --- | --- | 33 |
| 707 | hexetidine            | -0.114 | 4 | -0.473 | --- | --- | 25 |
| 708 | simvastatin           | -0.043 | 4 | 0.473  | --- | --- | 25 |
| 709 | tolazoline            | 0.103  | 5 | 0.47   | --- | --- | 40 |
| 710 | gibberellic acid      | 0.073  | 4 | 0.47   | --- | --- | 25 |
| 711 | isocarboxazid         | 0.129  | 5 | 0.468  | --- | --- | 40 |
| 712 | benzylpenicillin      | 0.007  | 4 | 0.468  | --- | --- | 25 |
| 713 | kawain                | 0.03   | 5 | 0.466  | --- | --- | 20 |
| 714 | Prestwick-984         | 0.095  | 4 | 0.464  | --- | --- | 25 |
| 715 | pancuronium bromide   | 0.008  | 4 | 0.464  | --- | --- | 25 |
| 716 | sulconazole           | -0.158 | 4 | 0.461  | --- | --- | 0  |
| 717 | pindolol              | -0.125 | 5 | -0.46  | --- | --- | 40 |
| 718 | quercetin             | 0.186  | 6 | 0.46   | --- | --- | 33 |
| 719 | rifampicin            | 0.119  | 4 | 0.46   | --- | --- | 25 |
| 720 | bacitracin            | -0.176 | 3 | -0.459 | --- | --- | 33 |
| 721 | harpagoside           | 0      | 4 | 0.458  | --- | --- | 0  |
| 722 | felbinac              | 0.163  | 4 | 0.458  | --- | --- | 25 |
| 723 | Prestwick-860         | -0.123 | 4 | 0.457  | --- | --- | 0  |
| 724 | fendiline             | 0      | 3 | 0.456  | --- | --- | 0  |
| 725 | monensin              | 0      | 6 | -0.456 | --- | --- | 0  |
| 726 | arcaine               | 0.148  | 4 | 0.456  | --- | --- | 25 |
| 727 | nimodipine            | -0.165 | 4 | -0.456 | --- | --- | 25 |

|     |                        |        |   |        |     |     |    |
|-----|------------------------|--------|---|--------|-----|-----|----|
| 728 | Prestwick-692          | 0      | 4 | 0.455  | --- | --- | 0  |
| 729 | vancomycin             | 0      | 4 | -0.455 | --- | --- | 0  |
| 730 | suprofen               | 0.126  | 4 | 0.454  | --- | --- | 25 |
| 731 | prednicarbate          | 0      | 3 | 0.454  | --- | --- | 0  |
| 732 | tetroquinone           | 0.149  | 4 | 0.454  | --- | --- | 25 |
| 733 | (+/-)-catechin         | 0.162  | 4 | 0.454  | --- | --- | 25 |
| 734 | tropicamide            | -0.063 | 6 | 0.451  | --- | --- | 0  |
| 735 | cobalt chloride        | 0.174  | 3 | 0.451  | --- | --- | 33 |
| 736 | levobunolol            | 0.12   | 4 | 0.451  | --- | --- | 25 |
| 737 | estriol                | -0.109 | 4 | 0.45   | --- | --- | 0  |
| 738 | tetrahydroalstonine    | 0.165  | 4 | 0.45   | --- | --- | 25 |
| 739 | mevalolactone          | 0.203  | 3 | 0.45   | --- | --- | 33 |
| 740 | 16,16-dimethylprostagl | 0.13   | 3 | 0.45   | --- | --- | 33 |
| 741 | ivermectin             | -0.021 | 5 | 0.449  | --- | --- | 20 |
| 742 | brompheniramine        | 0      | 4 | 0.448  | --- | --- | 0  |
| 743 | clidinium bromide      | 0.173  | 4 | 0.448  | --- | --- | 25 |
| 744 | clofazimine            | 0      | 5 | -0.447 | --- | --- | 0  |
| 745 | vinblastine            | 0.165  | 3 | 0.447  | --- | --- | 33 |
| 746 | butyl hydroxybenzoate  | 0      | 5 | 0.447  | --- | --- | 0  |
| 747 | carbimazole            | 0.269  | 3 | 0.446  | --- | --- | 33 |
| 748 | fluocinonide           | -0.079 | 5 | 0.445  | --- | --- | 0  |
| 749 | ceforanide             | 0.167  | 4 | 0.445  | --- | --- | 25 |
| 750 | nicotinic acid         | -0.098 | 4 | 0.445  | --- | --- | 0  |
| 751 | naftopidil             | -0.09  | 3 | 0.443  | --- | --- | 33 |
| 752 | alfuzosin              | 0.068  | 5 | 0.443  | --- | --- | 20 |
| 753 | Prestwick-674          | 0.042  | 6 | 0.443  | --- | --- | 33 |
| 754 | terconazole            | 0      | 4 | 0.441  | --- | --- | 0  |
| 755 | metamizole sodium      | -0.082 | 6 | 0.441  | --- | --- | 0  |
| 756 | Gly-His-Lys            | 0.266  | 3 | 0.441  | --- | --- | 33 |
| 757 | gramine                | -0.148 | 4 | -0.44  | --- | --- | 25 |
| 758 | doxycycline            | -0.081 | 5 | -0.44  | --- | --- | 20 |
| 759 | dyclonine              | 0.078  | 4 | 0.44   | --- | --- | 25 |
| 760 | guanadrel              | 0.121  | 5 | 0.439  | --- | --- | 20 |
| 761 | AG-028671              | -0.105 | 3 | -0.438 | --- | --- | 33 |
| 762 | tyloxapol              | -0.135 | 4 | 0.437  | --- | --- | 0  |
| 763 | betonicine             | -0.056 | 6 | -0.437 | --- | --- | 33 |
| 764 | bromopride             | 0      | 6 | 0.437  | --- | --- | 0  |
| 765 | atracurium besilate    | 0.257  | 3 | 0.435  | --- | --- | 33 |
| 766 | benzethonium chloride  | -0.146 | 3 | -0.435 | --- | --- | 33 |
| 767 | atractyloside          | 0.186  | 5 | 0.435  | --- | --- | 40 |
| 768 | homatropine            | -0.075 | 5 | -0.435 | --- | --- | 20 |
| 769 | ellipticine            | -0.138 | 4 | 0.434  | --- | --- | 0  |
| 770 | cyclobenzaprine        | 0.222  | 4 | 0.433  | --- | --- | 25 |
| 771 | nystatin               | -0.084 | 3 | -0.433 | --- | --- | 33 |
| 772 | spaglumic acid         | 0      | 2 | 0.433  | --- | --- | 0  |
| 773 | noscipine              | 0.141  | 4 | 0.433  | --- | --- | 25 |
| 774 | amphotericin B         | -0.074 | 4 | -0.432 | --- | --- | 25 |
| 775 | W-13                   | 0      | 2 | 0.431  | --- | --- | 0  |
| 776 | MK-886                 | 0      | 2 | 0.431  | --- | --- | 0  |
| 777 | ramifenazone           | 0.126  | 4 | 0.43   | --- | --- | 25 |
| 778 | convolamine            | 0.154  | 4 | 0.429  | --- | --- | 25 |
| 779 | carbenoxolone          | -0.078 | 4 | -0.427 | --- | --- | 25 |
| 780 | amrinone               | 0      | 4 | 0.427  | --- | --- | 0  |
| 781 | quinidine              | 0      | 3 | 0.427  | --- | --- | 0  |
| 782 | vanoxerine             | 0.135  | 4 | 0.427  | --- | --- | 25 |
| 783 | triamterene            | 0      | 5 | 0.426  | --- | --- | 0  |
| 784 | carbinoxamine          | -0.086 | 4 | 0.426  | --- | --- | 0  |
| 785 | Prestwick-1083         | 0      | 3 | 0.425  | --- | --- | 0  |
| 786 | oxyphenbutazone        | -0.126 | 4 | -0.425 | --- | --- | 25 |
| 787 | tranexamic acid        | 0.151  | 5 | 0.421  | --- | --- | 20 |
| 788 | fluoxetine             | -0.113 | 4 | -0.421 | --- | --- | 25 |

|     |                         |        |   |        |     |     |    |
|-----|-------------------------|--------|---|--------|-----|-----|----|
| 789 | ikarugamycin            | 0.17   | 3 | 0.42   | --- | --- | 33 |
| 790 | dinoprost               | 0.174  | 4 | 0.42   | --- | --- | 25 |
| 791 | streptomycin            | 0.118  | 4 | 0.419  | --- | --- | 25 |
| 792 | bemegride               | 0.16   | 4 | 0.418  | --- | --- | 25 |
| 793 | N-acetyl-L-aspartic aci | 0.13   | 4 | 0.418  | --- | --- | 25 |
| 794 | primaquine              | 0      | 4 | 0.418  | --- | --- | 0  |
| 795 | zomepirac               | -0.105 | 4 | 0.417  | --- | --- | 0  |
| 796 | AH-23848                | -0.14  | 3 | -0.417 | --- | --- | 33 |
| 797 | metrifonate             | 0      | 5 | 0.416  | --- | --- | 0  |
| 798 | nitrofurantoin          | 0.005  | 5 | 0.415  | --- | --- | 20 |
| 799 | primidone               | 0.095  | 4 | 0.414  | --- | --- | 25 |
| 800 | isoconazole             | 0      | 5 | 0.414  | --- | --- | 0  |
| 801 | thiamine                | 0      | 3 | 0.413  | --- | --- | 0  |
| 802 | Prestwick-864           | 0      | 4 | 0.412  | --- | --- | 0  |
| 803 | aminophylline           | 0.009  | 4 | 0.412  | --- | --- | 25 |
| 804 | etiocholanolone         | 0.157  | 6 | 0.412  | --- | --- | 33 |
| 805 | oxytetracycline         | -0.167 | 3 | 0.411  | --- | --- | 0  |
| 806 | amitriptyline           | 0.13   | 6 | 0.411  | --- | --- | 16 |
| 807 | hydrocortisone          | -0.24  | 3 | -0.411 | --- | --- | 33 |
| 808 | CP-319743               | 0.132  | 4 | 0.41   | --- | --- | 25 |
| 809 | Prestwick-664           | -0.152 | 6 | 0.41   | --- | --- | 0  |
| 810 | triprolidine            | 0      | 4 | 0.41   | --- | --- | 0  |
| 811 | pronetamol              | -0.081 | 4 | 0.409  | --- | --- | 0  |
| 812 | chlormezanone           | 0.121  | 4 | 0.408  | --- | --- | 25 |
| 813 | fludrocortisone         | 0.169  | 8 | 0.408  | --- | --- | 37 |
| 814 | nalbuphine              | -0.174 | 5 | -0.408 | --- | --- | 40 |
| 815 | benzthiazide            | 0.095  | 4 | 0.407  | --- | --- | 25 |
| 816 | clebopride              | -0.111 | 4 | -0.407 | --- | --- | 25 |
| 817 | pyrantel                | -0.2   | 5 | -0.407 | --- | --- | 40 |
| 818 | furaltadone             | 0.023  | 6 | 0.407  | --- | --- | 16 |
| 819 | hydroquinine            | -0.104 | 4 | -0.406 | --- | --- | 25 |
| 820 | racecadotril            | 0.106  | 4 | 0.406  | --- | --- | 25 |
| 821 | bretylum tosilate       | 0.173  | 4 | 0.405  | --- | --- | 25 |
| 822 | econazole               | 0.085  | 4 | 0.404  | --- | --- | 25 |
| 823 | guaifenesin             | -0.15  | 6 | -0.404 | --- | --- | 33 |
| 824 | sulindac                | 0.092  | 7 | 0.403  | --- | --- | 42 |
| 825 | phthalylsulfathiazole   | -0.095 | 5 | 0.402  | --- | --- | 0  |
| 826 | tetracaine              | 0.188  | 3 | 0.401  | --- | --- | 33 |
| 827 | diphenhydramine         | 0.124  | 5 | 0.401  | --- | --- | 20 |
| 828 | pipenzolate bromide     | -0.022 | 4 | 0.401  | --- | --- | 25 |
| 829 | clotrimazole            | 0.154  | 5 | 0.4    | --- | --- | 40 |
| 830 | sulfamethoxazole        | -0.215 | 5 | -0.4   | --- | --- | 40 |
| 831 | MG-262                  | 0      | 3 | 0.399  | --- | --- | 0  |
| 832 | ranitidine              | -0.084 | 5 | 0.399  | --- | --- | 0  |
| 833 | bufloxedil              | 0.018  | 4 | 0.398  | --- | --- | 25 |
| 834 | hydroxyzine             | 0      | 5 | 0.397  | --- | --- | 20 |
| 835 | thiethylperazine        | 0.146  | 4 | 0.397  | --- | --- | 25 |
| 836 | tolbutamide             | 0.019  | 7 | 0.395  | --- | --- | 42 |
| 837 | rolipram                | -0.101 | 4 | -0.394 | --- | --- | 25 |
| 838 | gallamine triethiodide  | -0.055 | 5 | 0.394  | --- | --- | 0  |
| 839 | cortisone               | -0.162 | 3 | 0.394  | --- | --- | 0  |
| 840 | tiapride                | 0.193  | 5 | 0.392  | --- | --- | 40 |
| 841 | ajmaline                | 0.116  | 3 | 0.392  | --- | --- | 33 |
| 842 | thiamphenicol           | 0.251  | 5 | 0.392  | --- | --- | 40 |
| 843 | loracarbef              | -0.08  | 4 | -0.391 | --- | --- | 25 |
| 844 | captopril               | 0.117  | 5 | 0.39   | --- | --- | 40 |
| 845 | streptozocin            | 0.212  | 4 | 0.39   | --- | --- | 25 |
| 846 | cephaeline              | 0      | 5 | -0.389 | --- | --- | 0  |
| 847 | meclofenamic acid       | -0.066 | 5 | -0.389 | --- | --- | 20 |
| 848 | methocarbamol           | 0.001  | 3 | 0.387  | --- | --- | 33 |
| 849 | memantine               | 0.107  | 4 | 0.386  | --- | --- | 25 |

|     |                       |        |   |        |     |     |    |
|-----|-----------------------|--------|---|--------|-----|-----|----|
| 850 | diclofenac            | 0.086  | 5 | 0.386  | --- | --- | 40 |
| 851 | isosorbide            | 0      | 4 | 0.386  | --- | --- | 0  |
| 852 | finasteride           | 0.16   | 6 | 0.386  | --- | --- | 33 |
| 853 | pimozide              | -0.093 | 4 | 0.385  | --- | --- | 0  |
| 854 | cefalonium            | 0.057  | 3 | 0.384  | --- | --- | 33 |
| 855 | PHA-00816795          | 0      | 2 | -0.384 | --- | --- | 0  |
| 856 | ioxaglic acid         | 0      | 3 | 0.384  | --- | --- | 0  |
| 857 | benzathine benzylpeni | 0.18   | 4 | 0.383  | --- | --- | 25 |
| 858 | rifabutin             | -0.163 | 3 | -0.382 | --- | --- | 33 |
| 859 | 3-acetylcoumarin      | 0.01   | 5 | 0.382  | --- | --- | 20 |
| 860 | lasalocid             | 0.109  | 4 | 0.382  | --- | --- | 25 |
| 861 | drofenine             | 0      | 4 | 0.382  | --- | --- | 0  |
| 862 | solasodine            | -0.178 | 6 | -0.381 | --- | --- | 33 |
| 863 | clopamide             | 0.15   | 4 | 0.381  | --- | --- | 25 |
| 864 | harmol                | 0.093  | 4 | 0.38   | --- | --- | 25 |
| 865 | boldine               | 0      | 4 | 0.38   | --- | --- | 0  |
| 866 | timolol               | 0.119  | 4 | 0.379  | --- | --- | 25 |
| 867 | ciclacillin           | -0.094 | 4 | -0.378 | --- | --- | 25 |
| 868 | urapidil              | -0.119 | 4 | 0.377  | --- | --- | 0  |
| 869 | Prestwick-691         | 0.14   | 3 | 0.377  | --- | --- | 33 |
| 870 | iopromide             | 0      | 4 | 0.377  | --- | --- | 0  |
| 871 | isoniazid             | 0.131  | 5 | 0.377  | --- | --- | 20 |
| 872 | ginkgolide A          | -0.123 | 4 | 0.377  | --- | --- | 0  |
| 873 | chlorogenic acid      | 0.03   | 4 | -0.376 | --- | --- | 25 |
| 874 | scriptaid             | -0.152 | 3 | 0.376  | --- | --- | 0  |
| 875 | withaferin A          | -0.084 | 4 | -0.376 | --- | --- | 25 |
| 876 | diphenylpyraline      | -0.05  | 6 | -0.375 | --- | --- | 16 |
| 877 | karakoline            | 0.078  | 6 | 0.374  | --- | --- | 16 |
| 878 | myricetin             | 0.132  | 4 | 0.374  | --- | --- | 25 |
| 879 | foliosidine           | 0      | 6 | 0.373  | --- | --- | 0  |
| 880 | prednisone            | 0.173  | 5 | 0.372  | --- | --- | 40 |
| 881 | hymecromone           | -0.095 | 4 | -0.372 | --- | --- | 25 |
| 882 | corbadrine            | -0.128 | 4 | -0.371 | --- | --- | 25 |
| 883 | caffeic acid          | -0.083 | 3 | 0.37   | --- | --- | 33 |
| 884 | debrisoquine          | 0      | 4 | 0.369  | --- | --- | 0  |
| 885 | isometheptene         | 0.142  | 4 | 0.369  | --- | --- | 25 |
| 886 | theophylline          | -0.138 | 4 | -0.369 | --- | --- | 25 |
| 887 | sodium phenylbutyrate | 0.003  | 7 | 0.368  | --- | --- | 28 |
| 888 | sulmazole             | 0.128  | 3 | 0.368  | --- | --- | 33 |
| 889 | niclosamide           | -0.225 | 5 | -0.368 | --- | --- | 40 |
| 890 | cyclic adenosine monc | 0.027  | 4 | -0.367 | --- | --- | 25 |
| 891 | sulfadiazine          | 0.005  | 5 | 0.367  | --- | --- | 20 |
| 892 | levocabastine         | -0.096 | 4 | -0.367 | --- | --- | 25 |
| 893 | levopropoxyphene      | 0.072  | 4 | -0.367 | --- | --- | 25 |
| 894 | nifenazone            | 0.129  | 5 | 0.365  | --- | --- | 40 |
| 895 | dl-alpha tocopherol   | -0.18  | 4 | -0.364 | --- | --- | 25 |
| 896 | adiphenine            | 0.146  | 5 | 0.364  | --- | --- | 20 |
| 897 | procaine              | -0.216 | 5 | -0.363 | --- | --- | 40 |
| 898 | trioxysalen           | -0.162 | 4 | 0.363  | --- | --- | 0  |
| 899 | sulfadimidine         | -0.17  | 6 | -0.362 | --- | --- | 33 |
| 900 | CP-690334-01          | -0.016 | 8 | -0.362 | --- | --- | 37 |
| 901 | aminohippuric acid    | -0.016 | 4 | 0.361  | --- | --- | 25 |
| 902 | demecarium bromide    | 0.103  | 4 | 0.361  | --- | --- | 25 |
| 903 | denatonium benzoate   | -0.127 | 4 | -0.361 | --- | --- | 25 |
| 904 | atropine oxide        | 0.144  | 5 | 0.361  | --- | --- | 40 |
| 905 | metoprolol            | 0.14   | 4 | 0.361  | --- | --- | 25 |
| 906 | trimethoprim          | -0.017 | 5 | 0.361  | --- | --- | 20 |
| 907 | fluorometholone       | 0.01   | 4 | 0.36   | --- | --- | 25 |
| 908 | vidarabine            | -0.123 | 4 | -0.36  | --- | --- | 25 |
| 909 | fusaric acid          | -0.174 | 4 | -0.36  | --- | --- | 25 |
| 910 | anisomycin            | 0      | 4 | 0.359  | --- | --- | 0  |

|     |                         |        |   |        |     |     |    |
|-----|-------------------------|--------|---|--------|-----|-----|----|
| 911 | chlortalidone           | -0.05  | 4 | -0.359 | --- | --- | 25 |
| 912 | phenylpropanolamine     | -0.096 | 4 | -0.359 | --- | --- | 25 |
| 913 | dipyridamole            | -0.113 | 6 | 0.358  | --- | --- | 16 |
| 914 | Prestwick-857           | 0      | 4 | 0.358  | --- | --- | 0  |
| 915 | pentoxifylline          | 0.108  | 5 | 0.358  | --- | --- | 20 |
| 916 | atropine                | -0.136 | 4 | -0.358 | --- | --- | 25 |
| 917 | (+)-chelidone           | 0.162  | 4 | 0.357  | --- | --- | 25 |
| 918 | methyldopa              | 0      | 5 | 0.357  | --- | --- | 0  |
| 919 | trimethylcolchicine     | 0.102  | 4 | 0.356  | --- | --- | 25 |
| 920 | trapidil                | 0.087  | 3 | 0.356  | --- | --- | 33 |
| 921 | cinchonine              | -0.037 | 4 | -0.356 | --- | --- | 25 |
| 922 | mecamylamine            | -0.144 | 3 | -0.355 | --- | --- | 33 |
| 923 | dapsone                 | 0.195  | 5 | 0.355  | --- | --- | 40 |
| 924 | nomifensine             | 0.035  | 5 | 0.355  | --- | --- | 20 |
| 925 | naproxen                | 0.165  | 9 | 0.354  | --- | --- | 33 |
| 926 | oxedrine                | 0.128  | 4 | 0.354  | --- | --- | 25 |
| 927 | pentolonium             | 0.05   | 5 | 0.354  | --- | --- | 40 |
| 928 | anabasine               | -0.156 | 3 | 0.352  | --- | --- | 0  |
| 929 | podophyllotoxin         | 0.175  | 4 | 0.351  | --- | --- | 25 |
| 930 | oxybutynin              | -0.004 | 4 | 0.351  | --- | --- | 25 |
| 931 | canrenoic acid          | -0.013 | 4 | 0.35   | --- | --- | 25 |
| 932 | aceclofenac             | 0.008  | 4 | -0.35  | --- | --- | 25 |
| 933 | Prestwick-983           | 0.182  | 3 | 0.35   | --- | --- | 33 |
| 934 | celecoxib               | 0.206  | 5 | 0.35   | --- | --- | 40 |
| 935 | phenoxybenzamine        | -0.126 | 4 | 0.35   | --- | --- | 0  |
| 936 | piracetam               | -0.16  | 4 | -0.35  | --- | --- | 25 |
| 937 | hemicholinium           | -0.153 | 4 | -0.349 | --- | --- | 25 |
| 938 | benzbromarone           | 0.129  | 3 | 0.349  | --- | --- | 33 |
| 939 | heliotrine              | -0.074 | 6 | 0.348  | --- | --- | 16 |
| 940 | etofenamate             | -0.137 | 4 | 0.348  | --- | --- | 0  |
| 941 | demeclocycline          | -0.128 | 6 | 0.348  | --- | --- | 16 |
| 942 | pirinixic acid          | 0.053  | 5 | 0.347  | --- | --- | 40 |
| 943 | resveratrol             | -0.107 | 9 | 0.347  | --- | --- | 0  |
| 944 | naftidrofuryl           | 0.096  | 4 | 0.346  | --- | --- | 25 |
| 945 | flurbiprofen            | -0.08  | 5 | -0.346 | --- | --- | 20 |
| 946 | chlorpropamide          | 0.05   | 6 | 0.346  | --- | --- | 33 |
| 947 | amprolium               | -0.065 | 5 | 0.346  | --- | --- | 40 |
| 948 | retrorsine              | -0.003 | 4 | 0.344  | --- | --- | 25 |
| 949 | khellin                 | 0.071  | 5 | 0.344  | --- | --- | 40 |
| 950 | dequalinium chloride    | -0.15  | 4 | 0.343  | --- | --- | 0  |
| 951 | heptaminol              | 0.213  | 5 | 0.343  | --- | --- | 40 |
| 952 | equilin                 | 0.057  | 5 | 0.342  | --- | --- | 20 |
| 953 | acenocoumarol           | -0.069 | 5 | -0.342 | --- | --- | 40 |
| 954 | diprophylline           | -0.171 | 5 | -0.341 | --- | --- | 40 |
| 955 | oxetacaine              | -0.083 | 5 | 0.341  | --- | --- | 20 |
| 956 | thiamazole              | -0.137 | 6 | -0.341 | --- | --- | 33 |
| 957 | naphazoline             | -0.056 | 5 | 0.341  | --- | --- | 0  |
| 958 | lomustine               | 0.074  | 4 | 0.34   | --- | --- | 25 |
| 959 | amylocaine              | 0.026  | 5 | 0.34   | --- | --- | 20 |
| 960 | amiprilose              | -0.07  | 4 | 0.34   | --- | --- | 0  |
| 961 | cefotetan               | -0.094 | 3 | 0.34   | --- | --- | 0  |
| 962 | 8-azaquanine            | -0.21  | 4 | 0.339  | --- | --- | 0  |
| 963 | nafcillin               | 0.029  | 4 | 0.339  | --- | --- | 25 |
| 964 | luteolin                | -0.168 | 4 | -0.339 | --- | --- | 25 |
| 965 | quipazine               | 0.092  | 4 | 0.339  | --- | --- | 25 |
| 966 | cefamandole             | 0.073  | 4 | 0.338  | --- | --- | 25 |
| 967 | 11-deoxy-16,16-dimethyl | -0.023 | 4 | 0.338  | --- | --- | 25 |
| 968 | tolnaftate              | 0.194  | 5 | 0.338  | --- | --- | 40 |
| 969 | rimexolone              | -0.148 | 4 | 0.338  | --- | --- | 0  |
| 970 | metoclopramide          | -0.062 | 6 | 0.336  | --- | --- | 33 |
| 971 | famotidine              | -0.028 | 5 | 0.335  | --- | --- | 20 |

|      |                      |        |    |        |     |     |    |
|------|----------------------|--------|----|--------|-----|-----|----|
| 972  | glycocholic acid     | 0.016  | 4  | 0.335  | --- | --- | 25 |
| 973  | megestrol            | -0.073 | 4  | 0.334  | --- | --- | 0  |
| 974  | fursultiamine        | -0.074 | 4  | 0.334  | --- | --- | 0  |
| 975  | tremorine            | -0.009 | 4  | 0.334  | --- | --- | 25 |
| 976  | rofecoxib            | -0.05  | 6  | -0.333 | --- | --- | 16 |
| 977  | betulin              | 0.154  | 3  | 0.333  | --- | --- | 33 |
| 978  | mebendazole          | -0.253 | 5  | -0.333 | --- | --- | 40 |
| 979  | staurosporine        | -0.063 | 4  | 0.333  | --- | --- | 25 |
| 980  | PF-00539745-00       | -0.023 | 3  | 0.333  | --- | --- | 33 |
| 981  | alprenolol           | -0.147 | 4  | -0.331 | --- | --- | 25 |
| 982  | molsidomine          | -0.075 | 4  | 0.331  | --- | --- | 0  |
| 983  | nipecotic acid       | -0.115 | 4  | 0.331  | --- | --- | 0  |
| 984  | dicycloverine        | 0.041  | 5  | 0.33   | --- | --- | 20 |
| 985  | levomepromazine      | 0.085  | 4  | 0.329  | --- | --- | 25 |
| 986  | quinethazone         | -0.085 | 4  | 0.329  | --- | --- | 0  |
| 987  | PHA-00745360         | -0.042 | 8  | -0.328 | --- | --- | 12 |
| 988  | scopoletin           | -0.213 | 2  | 0.328  | --- | --- | 0  |
| 989  | benfotiamine         | -0.222 | 5  | -0.327 | --- | --- | 40 |
| 990  | nabumetone           | -0.006 | 4  | 0.327  | --- | --- | 25 |
| 991  | difenidol            | -0.203 | 3  | 0.327  | --- | --- | 0  |
| 992  | diperodon            | 0.083  | 3  | 0.327  | --- | --- | 33 |
| 993  | ethoxyquin           | -0.194 | 5  | -0.326 | --- | --- | 40 |
| 994  | mycophenolic acid    | -0.006 | 3  | 0.327  | --- | --- | 33 |
| 995  | methazolamide        | -0.137 | 4  | 0.326  | --- | --- | 0  |
| 996  | monastrol            | 0.008  | 8  | 0.326  | --- | --- | 12 |
| 997  | novobiocin           | -0.01  | 9  | 0.326  | --- | --- | 11 |
| 998  | carisoprodol         | -0.016 | 4  | 0.325  | --- | --- | 25 |
| 999  | tolazamide           | -0.073 | 3  | -0.325 | --- | --- | 33 |
| 1000 | brinzolamide         | -0.079 | 4  | 0.325  | --- | --- | 0  |
| 1001 | pheneticillin        | 0.054  | 4  | 0.324  | --- | --- | 25 |
| 1002 | BCB000039            | -0.166 | 3  | -0.324 | --- | --- | 33 |
| 1003 | sulfamethoxypridazin | -0.179 | 5  | -0.323 | --- | --- | 40 |
| 1004 | calcium pantothenate | -0.135 | 4  | -0.322 | --- | --- | 25 |
| 1005 | dropropizine         | -0.07  | 4  | 0.322  | --- | --- | 25 |
| 1006 | lactobionic acid     | -0.081 | 4  | 0.322  | --- | --- | 0  |
| 1007 | 5155877              | 0.009  | 4  | 0.322  | --- | --- | 25 |
| 1008 | harman               | -0.081 | 4  | 0.321  | --- | --- | 0  |
| 1009 | methylprednisolone   | -0.127 | 4  | -0.321 | --- | --- | 25 |
| 1010 | baclofen             | -0.098 | 5  | -0.32  | --- | --- | 40 |
| 1011 | abamectin            | 0.03   | 4  | 0.32   | --- | --- | 25 |
| 1012 | protoveratrine A     | -0.032 | 4  | 0.32   | --- | --- | 25 |
| 1013 | triamcinolone        | 0.034  | 5  | 0.32   | --- | --- | 40 |
| 1014 | fluorouracil         | -0.154 | 4  | 0.32   | --- | --- | 0  |
| 1015 | alclometasone        | -0.033 | 4  | -0.319 | --- | --- | 25 |
| 1016 | erastin              | -0.082 | 4  | -0.318 | --- | --- | 25 |
| 1017 | etamivan             | -0.028 | 4  | 0.318  | --- | --- | 25 |
| 1018 | troglitazone         | -0.006 | 16 | 0.318  | --- | --- | 25 |
| 1019 | flunisolide          | -0.16  | 6  | 0.317  | --- | --- | 0  |
| 1020 | kanamycin            | 0.077  | 4  | 0.317  | --- | --- | 25 |
| 1021 | citolone             | -0.139 | 6  | 0.317  | --- | --- | 0  |
| 1022 | ciprofloxacin        | 0.037  | 5  | 0.317  | --- | --- | 20 |
| 1023 | serotonin            | -0.068 | 5  | -0.317 | --- | --- | 40 |
| 1024 | cycloserine          | -0.133 | 4  | -0.317 | --- | --- | 25 |
| 1025 | cyproterone          | -0.135 | 4  | 0.316  | --- | --- | 0  |
| 1026 | felodipine           | -0.094 | 7  | 0.316  | --- | --- | 0  |
| 1027 | leflunomide          | 0.016  | 4  | -0.316 | --- | --- | 25 |
| 1028 | isradipine           | -0.083 | 4  | 0.315  | --- | --- | 0  |
| 1029 | enoxacin             | -0.115 | 4  | -0.315 | --- | --- | 25 |
| 1030 | levamisole           | -0.155 | 4  | 0.315  | --- | --- | 0  |
| 1031 | sotalol              | -0.084 | 4  | 0.315  | --- | --- | 0  |
| 1032 | AH-6809              | -0.167 | 2  | 0.315  | --- | --- | 0  |

|      |                        |        |    |        |     |     |    |
|------|------------------------|--------|----|--------|-----|-----|----|
| 1033 | ioversol               | -0.16  | 4  | -0.314 | --- | --- | 25 |
| 1034 | pyrazinamide           | -0.108 | 4  | -0.314 | --- | --- | 25 |
| 1035 | betazole               | -0.223 | 5  | -0.314 | --- | --- | 40 |
| 1036 | 6-bromoindirubin-3'-ox | 0.049  | 7  | 0.313  | --- | --- | 28 |
| 1037 | milrinone              | -0.224 | 3  | -0.313 | --- | --- | 33 |
| 1038 | 0175029-0000           | -0.153 | 6  | 0.313  | --- | --- | 0  |
| 1039 | pirenzepine            | -0.154 | 5  | 0.312  | --- | --- | 0  |
| 1040 | sulfamonomethoxine     | 0.136  | 4  | 0.312  | --- | --- | 25 |
| 1041 | carbachol              | -0.157 | 4  | 0.312  | --- | --- | 0  |
| 1042 | flecainide             | 0.047  | 6  | 0.312  | --- | --- | 33 |
| 1043 | chlorzoxazone          | -0.058 | 4  | 0.311  | --- | --- | 25 |
| 1044 | betaxolol              | -0.002 | 4  | 0.311  | --- | --- | 25 |
| 1045 | proglumide             | 0.02   | 5  | 0.311  | --- | --- | 20 |
| 1046 | N-acetyl-L-leucine     | -0.14  | 4  | 0.311  | --- | --- | 0  |
| 1047 | phenformin             | 0.066  | 7  | 0.311  | --- | --- | 28 |
| 1048 | dinoprostone           | 0.057  | 4  | 0.31   | --- | --- | 25 |
| 1049 | diflunisal             | 0.05   | 5  | 0.31   | --- | --- | 20 |
| 1050 | cefsulodin             | -0.035 | 4  | 0.31   | --- | --- | 25 |
| 1051 | mepenzolate bromide    | -0.08  | 5  | -0.309 | --- | --- | 20 |
| 1052 | valdecoxib             | -0.114 | 3  | 0.309  | --- | --- | 0  |
| 1053 | arecoline              | -0.006 | 4  | -0.309 | --- | --- | 25 |
| 1054 | rosiglitazone          | 0.091  | 14 | 0.308  | --- | --- | 42 |
| 1055 | metyrapone             | -0.121 | 4  | 0.308  | --- | --- | 0  |
| 1056 | cimetidine             | 0.015  | 5  | 0.308  | --- | --- | 20 |
| 1057 | kaempferol             | 0.047  | 4  | 0.308  | --- | --- | 25 |
| 1058 | levonorgestrel         | -0.204 | 6  | 0.307  | --- | --- | 0  |
| 1059 | metronidazole          | 0.147  | 5  | 0.307  | --- | --- | 40 |
| 1060 | profenamine            | -0.095 | 4  | -0.307 | --- | --- | 25 |
| 1061 | colforsin              | -0.045 | 5  | 0.306  | --- | --- | 20 |
| 1062 | 6-azathymine           | -0.178 | 4  | 0.306  | --- | --- | 0  |
| 1063 | mometasone             | 0.055  | 4  | 0.306  | --- | --- | 25 |
| 1064 | troleandomycin         | -0.135 | 4  | 0.306  | --- | --- | 0  |
| 1065 | budesonide             | -0.018 | 4  | 0.305  | --- | --- | 25 |
| 1066 | homosalate             | -0.16  | 4  | 0.304  | --- | --- | 0  |
| 1067 | tranlycypromine        | -0.195 | 5  | 0.303  | --- | --- | 0  |
| 1068 | PNU-0230031            | 0.084  | 8  | 0.303  | --- | --- | 25 |
| 1069 | bendroflumethiazide    | -0.116 | 6  | 0.302  | --- | --- | 0  |
| 1070 | cefadroxil             | -0.088 | 4  | 0.302  | --- | --- | 0  |
| 1071 | cefazolin              | 0.032  | 5  | 0.301  | --- | --- | 20 |
| 1072 | meclofenoxate          | -0.177 | 6  | -0.3   | --- | --- | 33 |
| 1073 | flunarizine            | -0.144 | 4  | 0.3    | --- | --- | 0  |
| 1074 | doxylamine             | -0.06  | 5  | 0.299  | --- | --- | 20 |
| 1075 | acetohexamide          | 0.067  | 4  | 0.299  | --- | --- | 25 |
| 1076 | josamycin              | -0.05  | 5  | -0.298 | --- | --- | 40 |
| 1077 | diethylcarbamazine     | 0.051  | 4  | 0.298  | --- | --- | 25 |
| 1078 | lithocholic acid       | -0.009 | 6  | 0.298  | --- | --- | 16 |
| 1079 | azacyclonol            | 0.065  | 5  | 0.298  | --- | --- | 40 |
| 1080 | 6-benzylaminopurine    | -0.035 | 5  | 0.297  | --- | --- | 20 |
| 1081 | idoxuridine            | 0.017  | 5  | 0.297  | --- | --- | 20 |
| 1082 | laudanospine           | -0.008 | 4  | 0.297  | --- | --- | 25 |
| 1083 | buspirone              | -0.049 | 4  | 0.297  | --- | --- | 25 |
| 1084 | myosmine               | 0.079  | 6  | 0.297  | --- | --- | 33 |
| 1085 | methacholine chloride  | -0.201 | 3  | 0.296  | --- | --- | 0  |
| 1086 | PHA-00851261E          | 0.027  | 8  | 0.296  | --- | --- | 25 |
| 1087 | clemizole              | -0.105 | 5  | 0.294  | --- | --- | 0  |
| 1088 | 3-hydroxy-DL-kynureni  | 0.078  | 6  | 0.294  | --- | --- | 16 |
| 1089 | terazosin              | 0.088  | 4  | 0.293  | --- | --- | 25 |
| 1090 | nicardipine            | -0.012 | 4  | 0.293  | --- | --- | 25 |
| 1091 | etofylline             | -0.147 | 5  | 0.293  | --- | --- | 20 |
| 1092 | atovaquone             | -0.204 | 3  | 0.292  | --- | --- | 0  |
| 1093 | hydrochlorothiazide    | 0.131  | 5  | 0.292  | --- | --- | 40 |

|      |                        |        |    |        |     |     |    |
|------|------------------------|--------|----|--------|-----|-----|----|
| 1094 | ursodeoxycholic acid   | -0.213 | 3  | 0.292  | --- | --- | 0  |
| 1095 | sulfamethizole         | -0.105 | 4  | 0.291  | --- | --- | 25 |
| 1096 | clofilium tosylate     | -0.213 | 3  | -0.291 | --- | --- | 33 |
| 1097 | benzamil               | -0.035 | 6  | -0.291 | --- | --- | 33 |
| 1098 | pinacidil              | -0.054 | 4  | 0.291  | --- | --- | 25 |
| 1099 | disulfiram             | 0.118  | 5  | 0.29   | --- | --- | 40 |
| 1100 | methoxamine            | -0.011 | 4  | -0.29  | --- | --- | 25 |
| 1101 | hydrastinine           | 0.047  | 5  | 0.289  | --- | --- | 20 |
| 1102 | lidocaine              | -0.016 | 5  | 0.289  | --- | --- | 40 |
| 1103 | sulfadoxine            | -0.125 | 3  | -0.288 | --- | --- | 33 |
| 1104 | nicergoline            | -0.228 | 5  | -0.288 | --- | --- | 40 |
| 1105 | 15-delta prostaglandin | -0.085 | 15 | -0.288 | --- | --- | 33 |
| 1106 | desipramine            | 0.077  | 4  | 0.287  | --- | --- | 25 |
| 1107 | piperacillin           | -0.073 | 5  | -0.287 | --- | --- | 40 |
| 1108 | naftifine              | 0.06   | 4  | 0.287  | --- | --- | 25 |
| 1109 | cefoperazone           | -0.023 | 3  | -0.286 | --- | --- | 33 |
| 1110 | perphenazine           | -0.194 | 5  | -0.286 | --- | --- | 40 |
| 1111 | adiopidone             | -0.133 | 4  | -0.286 | --- | --- | 25 |
| 1112 | dimenhydrinate         | 0.082  | 4  | -0.286 | --- | --- | 25 |
| 1113 | procainamide           | -0.161 | 4  | 0.286  | --- | --- | 0  |
| 1114 | iodixanol              | 0.066  | 3  | 0.286  | --- | --- | 33 |
| 1115 | metformin              | -0.074 | 10 | -0.286 | --- | --- | 30 |
| 1116 | ganciclovir            | -0.108 | 4  | -0.285 | --- | --- | 25 |
| 1117 | sulfaquinolaxaline     | 0.062  | 3  | 0.285  | --- | --- | 33 |
| 1118 | L-methionine sulfoximi | -0.103 | 4  | 0.285  | --- | --- | 25 |
| 1119 | salsolinol             | -0.108 | 3  | -0.284 | --- | --- | 33 |
| 1120 | cytisine               | 0.019  | 4  | -0.284 | --- | --- | 25 |
| 1121 | lovastatin             | -0.044 | 4  | 0.284  | --- | --- | 25 |
| 1122 | asiaticoside           | -0.018 | 4  | 0.282  | --- | --- | 25 |
| 1123 | flunixin               | -0.17  | 5  | -0.282 | --- | --- | 20 |
| 1124 | eldeline               | -0.124 | 6  | 0.281  | --- | --- | 0  |
| 1125 | yohimbine              | -0.134 | 5  | -0.281 | --- | --- | 20 |
| 1126 | naltrexone             | 0.107  | 5  | 0.28   | --- | --- | 40 |
| 1127 | hydroxyachillin        | -0.101 | 4  | -0.28  | --- | --- | 25 |
| 1128 | PNU-0251126            | -0.002 | 6  | -0.28  | --- | --- | 33 |
| 1129 | PHA-00846566E          | -0.128 | 3  | 0.279  | --- | --- | 0  |
| 1130 | cisapride              | -0.156 | 4  | -0.278 | --- | --- | 25 |
| 1131 | Prestwick-689          | -0.014 | 4  | 0.278  | --- | --- | 25 |
| 1132 | raloxifene             | -0.125 | 7  | -0.278 | --- | --- | 28 |
| 1133 | tridihexethyl          | -0.129 | 4  | -0.278 | --- | --- | 25 |
| 1134 | 3-nitropropionic acid  | -0.187 | 4  | 0.277  | --- | --- | 0  |
| 1135 | isoxicam               | 0.044  | 5  | -0.277 | --- | --- | 20 |
| 1136 | colecalfiferol         | -0.225 | 4  | 0.276  | --- | --- | 0  |
| 1137 | nomegestrol            | 0.049  | 3  | 0.276  | --- | --- | 33 |
| 1138 | pralidoxime            | 0.011  | 4  | 0.274  | --- | --- | 25 |
| 1139 | meclozine              | -0.186 | 5  | 0.274  | --- | --- | 0  |
| 1140 | clindamycin            | -0.094 | 5  | -0.274 | --- | --- | 40 |
| 1141 | fluticasone            | -0.095 | 4  | -0.273 | --- | --- | 25 |
| 1142 | azathioprine           | -0.172 | 7  | 0.273  | --- | --- | 0  |
| 1143 | mefloquine             | -0.18  | 5  | -0.273 | --- | --- | 40 |
| 1144 | griseofulvin           | -0.041 | 5  | 0.273  | --- | --- | 20 |
| 1145 | oleandomycin           | -0.091 | 5  | -0.273 | --- | --- | 20 |
| 1146 | minoxidil              | 0.043  | 5  | 0.273  | --- | --- | 20 |
| 1147 | 5279552                | -0.214 | 2  | 0.272  | --- | --- | 0  |
| 1148 | flucytosine            | 0.032  | 4  | 0.272  | --- | --- | 25 |
| 1149 | epirizole              | -0.088 | 5  | -0.272 | --- | --- | 20 |
| 1150 | alprostadil            | 0.064  | 7  | 0.271  | --- | --- | 42 |
| 1151 | metampicillin          | 0.124  | 5  | 0.271  | --- | --- | 40 |
| 1152 | 0225151-0000           | -0.131 | 3  | 0.271  | --- | --- | 0  |
| 1153 | testosterone           | 0.036  | 5  | 0.271  | --- | --- | 40 |
| 1154 | CP-944629              | 0.003  | 4  | 0.27   | --- | --- | 25 |

|      |                        |        |   |        |     |     |    |
|------|------------------------|--------|---|--------|-----|-----|----|
| 1155 | biotin                 | -0.132 | 3 | 0.27   | --- | --- | 0  |
| 1156 | pheniramine            | -0.081 | 5 | 0.27   | --- | --- | 0  |
| 1157 | CP-320650-01           | 0.066  | 8 | 0.27   | --- | --- | 25 |
| 1158 | isoxsuprine            | -0.2   | 5 | -0.269 | --- | --- | 40 |
| 1159 | spectinomycin          | -0.009 | 4 | 0.269  | --- | --- | 25 |
| 1160 | hexylcaine             | -0.13  | 4 | -0.268 | --- | --- | 25 |
| 1161 | loxapine               | 0.038  | 4 | 0.268  | --- | --- | 25 |
| 1162 | alpha-ergocryptine     | -0.086 | 6 | -0.268 | --- | --- | 33 |
| 1163 | 4-hydroxyphenazone     | 0.071  | 5 | 0.268  | --- | --- | 40 |
| 1164 | gossypol               | 0.014  | 6 | 0.268  | --- | --- | 16 |
| 1165 | co-dergocrine mesilate | -0.098 | 4 | -0.266 | --- | --- | 25 |
| 1166 | tacrine                | -0.113 | 4 | -0.266 | --- | --- | 25 |
| 1167 | picotamide             | -0.111 | 5 | 0.266  | --- | --- | 20 |
| 1168 | azlocillin             | -0.154 | 4 | 0.265  | --- | --- | 0  |
| 1169 | erythromycin           | -0.047 | 5 | 0.265  | --- | --- | 20 |
| 1170 | dexpropranolol         | -0.16  | 3 | -0.264 | --- | --- | 33 |
| 1171 | tetracycline           | 0.054  | 5 | 0.264  | --- | --- | 20 |
| 1172 | tetraethylenepentamin  | -0.09  | 6 | 0.264  | --- | --- | 16 |
| 1173 | SC-19220               | -0.132 | 4 | -0.263 | --- | --- | 25 |
| 1174 | lomefloxacin           | 0.011  | 6 | 0.263  | --- | --- | 16 |
| 1175 | Prestwick-1085         | -0.15  | 4 | -0.263 | --- | --- | 25 |
| 1176 | paroxetine             | -0.109 | 4 | -0.262 | --- | --- | 25 |
| 1177 | apramycin              | -0.145 | 4 | 0.262  | --- | --- | 0  |
| 1178 | mexiletine             | -0.081 | 6 | 0.261  | --- | --- | 0  |
| 1179 | dizocilpine            | -0.125 | 5 | -0.261 | --- | --- | 20 |
| 1180 | iopanoic acid          | -0.078 | 4 | 0.26   | --- | --- | 25 |
| 1181 | velnacrine             | -0.028 | 4 | 0.26   | --- | --- | 25 |
| 1182 | kinetin                | -0.102 | 4 | 0.259  | --- | --- | 0  |
| 1183 | ribostamycin           | -0.148 | 4 | 0.259  | --- | --- | 0  |
| 1184 | mafenide               | 0.081  | 5 | 0.259  | --- | --- | 40 |
| 1185 | miconazole             | -0.231 | 5 | 0.259  | --- | --- | 0  |
| 1186 | CAY-10397              | -0.064 | 3 | -0.259 | --- | --- | 33 |
| 1187 | imipramine             | -0.113 | 4 | -0.257 | --- | --- | 25 |
| 1188 | etodolac               | -0.138 | 5 | 0.257  | --- | --- | 0  |
| 1189 | ketotifen              | 0.04   | 4 | -0.256 | --- | --- | 25 |
| 1190 | sulfachlorpyridazine   | -0.146 | 5 | -0.255 | --- | --- | 40 |
| 1191 | alfadolone             | -0.005 | 3 | 0.253  | --- | --- | 33 |
| 1192 | tribenoside            | -0.103 | 4 | 0.253  | --- | --- | 0  |
| 1193 | CP-863187              | -0.119 | 4 | -0.251 | --- | --- | 25 |
| 1194 | alimemazine            | -0.095 | 4 | 0.251  | --- | --- | 25 |
| 1195 | cefixime               | -0.143 | 4 | -0.251 | --- | --- | 25 |
| 1196 | furosemide             | 0.004  | 4 | -0.251 | --- | --- | 25 |
| 1197 | diazoxide              | -0.003 | 5 | 0.25   | --- | --- | 20 |
| 1198 | butacaine              | 0.041  | 4 | 0.25   | --- | --- | 25 |
| 1199 | salsolidin             | -0.157 | 4 | -0.25  | --- | --- | 25 |
| 1200 | domperidone            | 0.105  | 4 | 0.25   | --- | --- | 25 |
| 1201 | nifurtimox             | -0.144 | 4 | 0.249  | --- | --- | 0  |
| 1202 | levcycloserine         | -0.185 | 4 | 0.249  | --- | --- | 0  |
| 1203 | phenacetin             | -0.163 | 4 | 0.248  | --- | --- | 0  |
| 1204 | N-acetylmuramic acid   | -0.016 | 4 | -0.247 | --- | --- | 25 |
| 1205 | droperidol             | 0.009  | 4 | 0.247  | --- | --- | 25 |
| 1206 | tubocurarine chloride  | -0.169 | 4 | 0.247  | --- | --- | 0  |
| 1207 | minaprine              | -0.063 | 5 | 0.247  | --- | --- | 20 |
| 1208 | dexpanthenol           | -0.161 | 4 | 0.247  | --- | --- | 0  |
| 1209 | diflorasone            | -0.141 | 4 | 0.246  | --- | --- | 0  |
| 1210 | cinchocaine            | -0.069 | 5 | 0.246  | --- | --- | 20 |
| 1211 | methylbenzethonium c   | -0.04  | 6 | 0.246  | --- | --- | 16 |
| 1212 | chlorhexidine          | -0.076 | 5 | 0.246  | --- | --- | 20 |
| 1213 | succinylsulfathiazole  | -0.104 | 4 | -0.246 | --- | --- | 25 |
| 1214 | lycorine               | 0.035  | 5 | 0.245  | --- | --- | 40 |
| 1215 | todalazine             | -0.078 | 5 | 0.245  | --- | --- | 20 |

|      |                      |        |    |        |     |     |    |
|------|----------------------|--------|----|--------|-----|-----|----|
| 1216 | natamycin            | -0.203 | 4  | 0.245  | --- | --- | 0  |
| 1217 | sulfamerazine        | 0.082  | 5  | 0.244  | --- | --- | 40 |
| 1218 | dihydroergotamine    | -0.122 | 5  | -0.244 | --- | --- | 20 |
| 1219 | oxolinic acid        | -0.2   | 5  | -0.244 | --- | --- | 40 |
| 1220 | vinburnine           | -0.041 | 4  | 0.243  | --- | --- | 25 |
| 1221 | methantheinium bromi | -0.017 | 4  | 0.242  | --- | --- | 25 |
| 1222 | N6-methyladenosine   | -0.058 | 4  | -0.242 | --- | --- | 25 |
| 1223 | fenspiride           | -0.151 | 5  | -0.241 | --- | --- | 40 |
| 1224 | metolazone           | -0.106 | 5  | -0.241 | --- | --- | 40 |
| 1225 | nilutamide           | 0.019  | 4  | 0.24   | --- | --- | 25 |
| 1226 | promethazine         | -0.183 | 4  | -0.24  | --- | --- | 25 |
| 1227 | neomycin             | 0.025  | 5  | 0.24   | --- | --- | 20 |
| 1228 | terguride            | -0.045 | 8  | 0.239  | --- | --- | 25 |
| 1229 | indometacin          | -0.081 | 8  | -0.239 | --- | --- | 37 |
| 1230 | (+)-isoprenaline     | -0.135 | 4  | 0.239  | --- | --- | 0  |
| 1231 | zaprinast            | 0.034  | 4  | 0.239  | --- | --- | 25 |
| 1232 | pridinol             | -0.107 | 4  | 0.238  | --- | --- | 0  |
| 1233 | corynanthine         | -0.098 | 3  | 0.238  | --- | --- | 33 |
| 1234 | tracazolate          | -0.143 | 4  | -0.238 | --- | --- | 25 |
| 1235 | disopyramide         | 0.054  | 4  | 0.238  | --- | --- | 25 |
| 1236 | iobenguane           | -0.125 | 4  | -0.236 | --- | --- | 25 |
| 1237 | propidium iodide     | -0.076 | 4  | 0.236  | --- | --- | 25 |
| 1238 | methotrexate         | 0.015  | 8  | 0.236  | --- | --- | 25 |
| 1239 | phentolamine         | 0.049  | 7  | 0.236  | --- | --- | 28 |
| 1240 | zidovudine           | 0.025  | 4  | 0.235  | --- | --- | 25 |
| 1241 | lobeline             | -0.066 | 4  | -0.234 | --- | --- | 25 |
| 1242 | thiopropazine        | -0.083 | 5  | -0.233 | --- | --- | 40 |
| 1243 | riluzole             | -0.121 | 5  | 0.233  | --- | --- | 0  |
| 1244 | butamben             | 0.053  | 4  | 0.232  | --- | --- | 25 |
| 1245 | carbamazepine        | -0.087 | 8  | 0.232  | --- | --- | 12 |
| 1246 | sulfathiazole        | -0.117 | 5  | -0.232 | --- | --- | 40 |
| 1247 | oxamniquine          | 0.052  | 4  | 0.23   | --- | --- | 25 |
| 1248 | physostigmine        | -0.001 | 4  | 0.23   | --- | --- | 25 |
| 1249 | nitrendipine         | -0.111 | 5  | 0.23   | --- | --- | 20 |
| 1250 | oxaprozin            | -0.141 | 6  | 0.228  | --- | --- | 16 |
| 1251 | octopamine           | -0.008 | 4  | 0.228  | --- | --- | 25 |
| 1252 | estradiol            | 0.124  | 37 | 0.227  | --- | --- | 35 |
| 1253 | ciclosporin          | 0.057  | 6  | -0.227 | --- | --- | 33 |
| 1254 | harmaline            | -0.013 | 4  | -0.226 | --- | --- | 25 |
| 1255 | tocainide            | -0.01  | 4  | -0.226 | --- | --- | 25 |
| 1256 | mesalazine           | 0.052  | 5  | 0.225  | --- | --- | 20 |
| 1257 | PF-01378883-00       | -0.012 | 4  | 0.225  | --- | --- | 25 |
| 1258 | prasterone           | -0.029 | 4  | 0.223  | --- | --- | 25 |
| 1259 | tenoxicam            | -0.063 | 4  | -0.223 | --- | --- | 25 |
| 1260 | wortmannin           | -0.16  | 18 | -0.222 | --- | --- | 38 |
| 1261 | AG-013608            | -0.068 | 8  | 0.222  | --- | --- | 12 |
| 1262 | clioquinol           | -0.093 | 5  | -0.222 | --- | --- | 20 |
| 1263 | bephenium hydroxynal | -0.12  | 5  | 0.222  | --- | --- | 20 |
| 1264 | pentamidine          | -0.146 | 5  | 0.221  | --- | --- | 0  |
| 1265 | (-)-isoprenaline     | -0.156 | 4  | 0.22   | --- | --- | 0  |
| 1266 | sulfanilamide        | -0.081 | 4  | -0.22  | --- | --- | 25 |
| 1267 | acacetin             | -0.034 | 6  | 0.22   | --- | --- | 16 |
| 1268 | ritodrine            | -0.123 | 4  | -0.22  | --- | --- | 25 |
| 1269 | allantoin            | -0.06  | 5  | 0.22   | --- | --- | 20 |
| 1270 | securinine           | -0.075 | 4  | -0.219 | --- | --- | 25 |
| 1271 | antimycin A          | -0.199 | 5  | 0.217  | --- | --- | 0  |
| 1272 | naloxone             | -0.166 | 6  | 0.217  | --- | --- | 0  |
| 1273 | apomorphine          | -0.221 | 5  | 0.217  | --- | --- | 0  |
| 1274 | morantel             | -0.194 | 5  | -0.215 | --- | --- | 40 |
| 1275 | genistein            | 0.074  | 17 | 0.212  | --- | --- | 29 |
| 1276 | fulvestrant          | -0.23  | 40 | -0.21  | --- | --- | 47 |

|      |                         |        |    |        |     |     |    |
|------|-------------------------|--------|----|--------|-----|-----|----|
| 1277 | mianserin               | -0.194 | 5  | -0.209 | --- | --- | 40 |
| 1278 | tetrandrine             | 0.017  | 4  | -0.209 | --- | --- | 25 |
| 1279 | Chicago Sky Blue 6B     | -0.029 | 4  | 0.208  | --- | --- | 25 |
| 1280 | epivincamine            | 0.017  | 4  | 0.207  | --- | --- | 25 |
| 1281 | 0317956-0000            | -0.009 | 8  | -0.206 | --- | --- | 37 |
| 1282 | pentetic acid           | 0.017  | 5  | -0.205 | --- | --- | 20 |
| 1283 | prednisolone            | -0.058 | 5  | -0.205 | --- | --- | 40 |
| 1284 | clozapine               | -0.069 | 17 | -0.202 | --- | --- | 35 |
| 1285 | alexidine               | -0.144 | 4  | -0.2   | --- | --- | 25 |
| 1286 | ascorbic acid           | 0.002  | 4  | 0.199  | --- | --- | 25 |
| 1287 | tiabendazole            | -0.117 | 4  | 0.198  | --- | --- | 0  |
| 1288 | lynestrenol             | -0.048 | 5  | 0.197  | --- | --- | 20 |
| 1289 | nifedipine              | -0.044 | 7  | 0.197  | --- | --- | 14 |
| 1290 | conessine               | -0.002 | 4  | 0.196  | --- | --- | 25 |
| 1291 | dexibuprofen            | -0.03  | 4  | 0.195  | --- | --- | 25 |
| 1292 | tamoxifen               | -0.088 | 7  | 0.194  | --- | --- | 14 |
| 1293 | chlortetracycline       | -0.153 | 5  | -0.193 | --- | --- | 40 |
| 1294 | deferoxamine            | -0.137 | 8  | 0.193  | --- | --- | 12 |
| 1295 | meclocycline            | -0.019 | 4  | 0.192  | --- | --- | 25 |
| 1296 | mephesisin              | -0.116 | 5  | 0.186  | --- | --- | 20 |
| 1297 | haloperidol             | -0.066 | 32 | -0.185 | --- | --- | 31 |
| 1298 | acebutolol              | -0.079 | 5  | 0.183  | --- | --- | 20 |
| 1299 | mebeverine              | -0.007 | 4  | -0.182 | --- | --- | 25 |
| 1300 | mefenamic acid          | -0.042 | 5  | 0.181  | --- | --- | 20 |
| 1301 | paclitaxel              | -0.098 | 6  | 0.18   | --- | --- | 16 |
| 1302 | dantrolene              | -0.124 | 6  | -0.178 | --- | --- | 33 |
| 1303 | orphenadrine            | -0.064 | 6  | 0.175  | --- | --- | 16 |
| 1304 | chlorpromazine          | -0.202 | 19 | -0.17  | --- | --- | 42 |
| 1305 | monorden                | -0.105 | 22 | -0.168 | --- | --- | 40 |
| 1306 | 0179445-0000            | -0.123 | 8  | -0.166 | --- | --- | 25 |
| 1307 | glipizide               | -0.068 | 5  | 0.16   | --- | --- | 20 |
| 1308 | diphemanil metilsulfate | -0.058 | 5  | 0.151  | --- | --- | 20 |
| 1309 | PF-00562151-00          | -0.013 | 8  | 0.139  | --- | --- | 25 |
